# Supplementary material
Source: Royal Society of Chemistry journal article supplement (doi:10.1039/d6ce00096g)
Supplement: d6ce00096g2.xlsx [file d6ce00096g2.xlsx]

## Sheet: FIGURE 1(a)
FIGURE 1(a)
2 Theta (degree)	Intensity (a.u.)	2 Theta (degree)	Intensity (a.u.)	2 Theta (degree)	Intensity (a.u.)
2	16357.9	2	457365	2	779365
2.01	16924	2.01	457019	2.01	779675
2.02	16874.2	2.02	457080	2.02	779554
2.03	16557.8	2.03	457359	2.03	779777
2.04	16778.3	2.04	457714	2.04	778665
2.05	16122.5	2.05	457078	2.05	778927
2.06	16299.1	2.06	457096	2.06	779468
2.07	16317.9	2.07	456660	2.07	779739
2.08	16787.2	2.08	457002	2.08	779258
2.09	16785.1	2.09	457325	2.09	778858
2.1	16735.3	2.1	457096	2.1	778252
2.11	16611.1	2.11	456984	2.11	778994
2.12	17104.6	2.12	457296	2.12	779379
2.13	17074.4	2.13	457195	2.13	778948
2.14	16815.6	2.14	457245	2.14	779321
2.15	17340.9	2.15	456898	2.15	779509
2.16	16754	2.16	457281	2.16	778751
2.17	17486.8	2.17	457272	2.17	779247
2.18	17330.3	2.18	457963	2.18	778908
2.19	17064	2.19	457788	2.19	778906
2.2	17288	2.2	458629	2.2	778804
2.21	18077.1	2.21	457982	2.21	779532
2.22	17612.7	2.22	457362	2.22	779600
2.23	17435.5	2.23	457231	2.23	779018
2.24	16967	2.24	458019	2.24	779534
2.25	17179.3	2.25	457939	2.25	779357
2.26	17599.2	2.26	458204	2.26	779536
2.27	17444.5	2.27	458968	2.27	780010
2.28	17968.1	2.28	458515	2.28	779068
2.29	17419.3	2.29	458677	2.29	778828
2.3	17559.7	2.3	458804	2.3	779638
2.31	17515	2.31	458816	2.31	779806
2.32	17371.9	2.32	459298	2.32	779887
2.33	17564.6	2.33	459430	2.33	780111
2.34	17904.8	2.34	458515	2.34	779815
2.35	18597.9	2.35	460040	2.35	779938
2.36	19231.7	2.36	460367	2.36	780491
2.37	18946.3	2.37	461145	2.37	779970
2.38	19167.2	2.38	461575	2.38	780919
2.39	19728.4	2.39	461414	2.39	781026
2.4	19998.3	2.4	462198	2.4	781642
2.41	20691.2	2.41	462110	2.41	781060
2.42	21024.9	2.42	462332	2.42	781269
2.43	20899.5	2.43	462336	2.43	782219
2.44	22164.1	2.44	462091	2.44	782153
2.45	21655.1	2.45	462271	2.45	781661
2.46	22370.2	2.46	462430	2.46	782605
2.47	21648.2	2.47	462697	2.47	782001
2.48	21673.2	2.48	463753	2.48	782992
2.49	22663.6	2.49	462651	2.49	783263
2.5	22128.1	2.5	462671	2.5	782856
2.51	22100.9	2.51	462468	2.51	782839
2.52	22511.7	2.52	463178	2.52	783179
2.53	22755.3	2.53	463160	2.53	782672
2.54	22528.6	2.54	463000	2.54	783531
2.55	22565.7	2.55	463665	2.55	783435
2.56	22295.3	2.56	462980	2.56	783226
2.57	22271.1	2.57	463079	2.57	783594
2.58	23682.3	2.58	462243	2.58	783111
2.59	22773.3	2.59	462909	2.59	782761
2.6	23346.7	2.6	463680	2.6	782516
2.61	22511.5	2.61	462686	2.61	782804
2.62	22899	2.62	463320	2.62	782806
2.63	22896.1	2.63	463828	2.63	782437
2.64	22663.8	2.64	463322	2.64	782419
2.65	22905.6	2.65	462971	2.65	782699
2.66	23135.1	2.66	463144	2.66	783307
2.67	22566.9	2.67	463273	2.67	783456
2.68	23077	2.68	463546	2.68	783006
2.69	23395.2	2.69	463734	2.69	782331
2.7	22253.5	2.7	462811	2.7	782789
2.71	22977.9	2.71	462850	2.71	783563
2.72	23052	2.72	463371	2.72	782991
2.73	22860.2	2.73	464430	2.73	782469
2.74	23042.8	2.74	462458	2.74	783297
2.75	22991.6	2.75	463624	2.75	783137
2.76	22395.9	2.76	462894	2.76	783327
2.77	23026.5	2.77	463086	2.77	782893
2.78	23208.4	2.78	463779	2.78	783120
2.79	23339.6	2.79	462700	2.79	782789
2.8	22763.3	2.8	463370	2.8	783070
2.81	23817.5	2.81	462923	2.81	782593
2.82	23313.9	2.82	463247	2.82	783033
2.83	23095.7	2.83	463572	2.83	782556
2.84	22565	2.84	464301	2.84	782774
2.85	23004.1	2.85	462857	2.85	782917
2.86	22766.4	2.86	462571	2.86	782447
2.87	23383.8	2.87	462857	2.87	783187
2.88	23296.6	2.88	463572	2.88	783322
2.89	23960.9	2.89	463775	2.89	783109
2.9	23796.5	2.9	463966	2.9	783186
2.91	22795	2.91	464425	2.91	782696
2.92	22781.1	2.92	463799	2.92	782700
2.93	23010.4	2.93	463574	2.93	782870
2.94	23351.9	2.94	464433	2.94	783601
2.95	23183.4	2.95	463828	2.95	782568
2.96	24355.3	2.96	463608	2.96	782777
2.97	23679.6	2.97	464056	2.97	783708
2.98	23905.3	2.98	464105	2.98	783643
2.99	23882.5	2.99	463529	2.99	783482
3	24316.9	3	463919	3	783133
3.01	23924.6	3.01	464850	3.01	783541
3.02	23872.7	3.02	465074	3.02	783154
3.03	24592.5	3.03	464749	3.03	783794
3.04	24714.1	3.04	464355	3.04	782982
3.05	23915.4	3.05	464435	3.05	782815
3.06	23905.5	3.06	464654	3.06	783561
3.07	24587.9	3.07	464797	3.07	783019
3.08	24934.5	3.08	464410	3.08	783220
3.09	24558.1	3.09	464435	3.09	782834
3.1	24932.3	3.1	465099	3.1	782743
3.11	24621.7	3.11	465430	3.11	783712
3.12	24237.1	3.12	465034	3.12	783686
3.13	24412.2	3.13	464852	3.13	783534
3.14	24288.3	3.14	465706	3.14	783450
3.15	25004.2	3.15	465528	3.15	783651
3.16	25794.8	3.16	465062	3.16	784025
3.17	25776	3.17	465971	3.17	783661
3.18	25593.1	3.18	465202	3.18	783747
3.19	26610.6	3.19	465335	3.19	783592
3.2	25880.5	3.2	466067	3.2	783693
3.21	25827	3.21	466682	3.21	784279
3.22	25694.2	3.22	465579	3.22	784078
3.23	26224.4	3.23	466032	3.23	784079
3.24	26260.2	3.24	465911	3.24	784115
3.25	26033.3	3.25	465959	3.25	783625
3.26	27195.2	3.26	465586	3.26	783693
3.27	26174.6	3.27	465790	3.27	784450
3.28	26628.2	3.28	465523	3.28	784282
3.29	26884.8	3.29	465512	3.29	783500
3.3	26775.6	3.3	465577	3.3	784839
3.31	26940.7	3.31	465416	3.31	784446
3.32	26735.1	3.32	466311	3.32	784803
3.33	26419	3.33	466000	3.33	784198
3.34	27171.1	3.34	465895	3.34	783732
3.35	27261.1	3.35	465793	3.35	784673
3.36	26855	3.36	466186	3.36	784719
3.37	27313.7	3.37	467427	3.37	784729
3.38	26539.3	3.38	466521	3.38	785460
3.39	27055.7	3.39	465336	3.39	784313
3.4	27735.9	3.4	466451	3.4	784592
3.41	27369.4	3.41	466756	3.41	785271
3.42	26455.4	3.42	465861	3.42	784666
3.43	26944.2	3.43	466757	3.43	785362
3.44	26922.9	3.44	465998	3.44	785564
3.45	27759.6	3.45	466830	3.45	785125
3.46	27123.6	3.46	465715	3.46	785313
3.47	27470.1	3.47	465308	3.47	785254
3.48	28395.8	3.48	465756	3.48	785460
3.49	27483.6	3.49	466610	3.49	785510
3.5	27847.9	3.5	466942	3.5	785160
3.51	27503.4	3.51	466026	3.51	784527
3.52	27121.2	3.52	465767	3.52	785006
3.53	27470.3	3.53	467040	3.53	785424
3.54	27039.9	3.54	466677	3.54	784527
3.55	27528.9	3.55	466702	3.55	784967
3.56	28553.3	3.56	467490	3.56	784948
3.57	28052.6	3.57	466143	3.57	785775
3.58	27923	3.58	466090	3.58	785117
3.59	26719.2	3.59	467011	3.59	785281
3.6	28318.6	3.6	466702	3.6	785514
3.61	28336.6	3.61	466773	3.61	786067
3.62	28215.8	3.62	466814	3.62	786106
3.63	28089.4	3.63	466946	3.63	784775
3.64	28540.3	3.64	466952	3.64	785196
3.65	27988.2	3.65	467825	3.65	785225
3.66	28112.8	3.66	467676	3.66	784937
3.67	28580.3	3.67	466990	3.67	785815
3.68	27363.2	3.68	466819	3.68	785543
3.69	27562.5	3.69	466741	3.69	786194
3.7	28014.3	3.7	467091	3.7	786043
3.71	27913	3.71	467273	3.71	785451
3.72	27940	3.72	466986	3.72	785733
3.73	28966.4	3.73	467133	3.73	785917
3.74	28329.6	3.74	467364	3.74	785313
3.75	27953.5	3.75	467272	3.75	786490
3.76	28699.3	3.76	467670	3.76	785714
3.77	28642.3	3.77	466992	3.77	785008
3.78	28384.6	3.78	466953	3.78	785503
3.79	29130	3.79	466583	3.79	785257
3.8	29464.2	3.8	467023	3.8	785640
3.81	29404.7	3.81	467759	3.81	785339
3.82	28090.4	3.82	468052	3.82	785475
3.83	27970.7	3.83	467004	3.83	785690
3.84	28738.5	3.84	467580	3.84	785359
3.85	29325.4	3.85	467553	3.85	786526
3.86	28086.4	3.86	467092	3.86	786632
3.87	28454.4	3.87	466982	3.87	786248
3.88	28241.2	3.88	467354	3.88	785155
3.89	28781.3	3.89	467507	3.89	784372
3.9	28716	3.9	467008	3.9	785873
3.91	29075.2	3.91	467418	3.91	785547
3.92	28116.9	3.92	466996	3.92	785444
3.93	28718.8	3.93	468160	3.93	786833
3.94	28984.9	3.94	467734	3.94	785195
3.95	28515.4	3.95	466680	3.95	785537
3.96	28819	3.96	466790	3.96	784326
3.97	28860.2	3.97	468696	3.97	785320
3.98	29059.6	3.98	466920	3.98	784872
3.99	28868.9	3.99	466506	3.99	785384
4	29285.6	4	467484	4	785350
4.01	28893.8	4.01	468015	4.01	785779
4.02	28648.1	4.02	467960	4.02	786018
4.03	28076.8	4.03	466420	4.03	785371
4.04	29048.4	4.04	467092	4.04	785782
4.05	28723.5	4.05	466647	4.05	785920
4.06	28597.5	4.06	467064	4.06	786872
4.07	28577.5	4.07	466538	4.07	785546
4.08	29107.6	4.08	466278	4.08	785548
4.09	28633.7	4.09	465705	4.09	785652
4.1	27999.8	4.1	467324	4.1	785994
4.11	28061	4.11	466790	4.11	785498
4.12	29432.1	4.12	466828	4.12	785796
4.13	29027.6	4.13	466769	4.13	785533
4.14	30112.9	4.14	467616	4.14	785697
4.15	28140.6	4.15	466750	4.15	785258
4.16	28935.7	4.16	467687	4.16	785041
4.17	29278.4	4.17	467660	4.17	784602
4.18	28503.7	4.18	466608	4.18	785619
4.19	28580.7	4.19	466436	4.19	785100
4.2	29061.1	4.2	467573	4.2	785654
4.21	27739.2	4.21	466870	4.21	785053
4.22	28698.6	4.22	467893	4.22	785839
4.23	29616	4.23	467130	4.23	786013
4.24	29196	4.24	466690	4.24	785464
4.25	29680.7	4.25	467260	4.25	785739
4.26	29671.7	4.26	466507	4.26	785474
4.27	29301.2	4.27	467548	4.27	785304
4.28	28813.5	4.28	467519	4.28	785584
4.29	28886	4.29	466965	4.29	786341
4.3	29233.9	4.3	467721	4.3	785642
4.31	28575.4	4.31	467629	4.31	785778
4.32	28198.9	4.32	467555	4.32	785474
4.33	28958.2	4.33	467805	4.33	785661
4.34	29791.2	4.34	466799	4.34	786258
4.35	29381.6	4.35	467741	4.35	785867
4.36	28902.7	4.36	467310	4.36	786472
4.37	29823.3	4.37	467475	4.37	785828
4.38	28792.7	4.38	467805	4.38	784891
4.39	29126.3	4.39	466625	4.39	785411
4.4	28859.8	4.4	467539	4.4	785191
4.41	29109	4.41	467572	4.41	785836
4.42	29638.7	4.42	466849	4.42	785927
4.43	29818.1	4.43	466799	4.43	785618
4.44	30189.9	4.44	467116	4.44	786107
4.45	29201.5	4.45	466460	4.45	784925
4.46	29155.2	4.46	467029	4.46	785837
4.47	30061.3	4.47	466499	4.47	784792
4.48	28864.8	4.48	468018	4.48	785480
4.49	28817.7	4.49	468069	4.49	785456
4.5	29150.1	4.5	467568	4.5	785400
4.51	30223.1	4.51	467896	4.51	785733
4.52	29206.8	4.52	466340	4.52	786210
4.53	28835.3	4.53	467375	4.53	785429
4.54	28630.5	4.54	467632	4.54	785181
4.55	29127.6	4.55	467397	4.55	785741
4.56	28808.6	4.56	467400	4.56	785522
4.57	30242.6	4.57	467817	4.57	785469
4.58	29822	4.58	467586	4.58	785395
4.59	29880.1	4.59	468349	4.59	785586
4.6	29660.5	4.6	467830	4.6	784643
4.61	29565.7	4.61	467922	4.61	786126
4.62	29377.5	4.62	467101	4.62	785091
4.63	29988.8	4.63	467277	4.63	784911
4.64	30018.6	4.64	467039	4.64	785537
4.65	29974.5	4.65	467038	4.65	785538
4.66	29813.1	4.66	467762	4.66	785360
4.67	29693.4	4.67	467547	4.67	784819
4.68	28523.3	4.68	467603	4.68	785238
4.69	29945.2	4.69	467097	4.69	785154
4.7	29623.4	4.7	467480	4.7	784830
4.71	29741.7	4.71	468029	4.71	786320
4.72	29998.6	4.72	467548	4.72	786009
4.73	30040.8	4.73	467819	4.73	786440
4.74	29144.8	4.74	467742	4.74	785823
4.75	30354.4	4.75	468066	4.75	785902
4.76	30389.1	4.76	467645	4.76	785996
4.77	30543.1	4.77	467902	4.77	786043
4.78	29951.5	4.78	467372	4.78	786153
4.79	29750.1	4.79	466869	4.79	785497
4.8	30755.5	4.8	467624	4.8	786000
4.81	30458.6	4.81	467331	4.81	785646
4.82	30612	4.82	467829	4.82	784751
4.83	29709.1	4.83	467290	4.83	785830
4.84	30272.6	4.84	467793	4.84	786022
4.85	30492.8	4.85	467432	4.85	785358
4.86	29684.2	4.86	467539	4.86	786340
4.87	29384.3	4.87	468198	4.87	785753
4.88	29790.4	4.88	467306	4.88	786315
4.89	30858.5	4.89	467414	4.89	785696
4.9	31307	4.9	467860	4.9	786796
4.91	31580.1	4.91	467233	4.91	786518
4.92	30091	4.92	467513	4.92	785052
4.93	31200.8	4.93	467830	4.93	785959
4.94	29694.4	4.94	468004	4.94	786258
4.95	30470.9	4.95	467893	4.95	785510
4.96	29893.1	4.96	468520	4.96	785436
4.97	31026.9	4.97	468625	4.97	786813
4.98	30461.5	4.98	467485	4.98	786155
4.99	31443.2	4.99	468150	4.99	785940
5	31638.6	5	468200	5	786579
5.01	31574.7	5.01	467864	5.01	786075
5.02	31704.8	5.02	468111	5.02	785755
5.03	31193.7	5.03	467937	5.03	784856
5.04	30897.2	5.04	468737	5.04	786276
5.05	30934.2	5.05	468014	5.05	786652
5.06	30419.8	5.06	468976	5.06	785618
5.07	31313.8	5.07	468411	5.07	785756
5.08	32010.7	5.08	468177	5.08	786248
5.09	31410.8	5.09	467839	5.09	786024
5.1	31137.1	5.1	467425	5.1	785341
5.11	31415.5	5.11	468096	5.11	785511
5.12	31021.3	5.12	468401	5.12	786006
5.13	31243.7	5.13	467931	5.13	786006
5.14	31318.7	5.14	468041	5.14	785437
5.15	31345.1	5.15	468838	5.15	786378
5.16	30698.7	5.16	468343	5.16	785836
5.17	31769.8	5.17	468309	5.17	785732
5.18	30949.9	5.18	468497	5.18	786054
5.19	29887.2	5.19	468887	5.19	786791
5.2	31920.7	5.2	468077	5.2	786187
5.21	31003.9	5.21	468269	5.21	785754
5.22	30637.8	5.22	468587	5.22	785961
5.23	31796.8	5.23	467540	5.23	785936
5.24	32510.1	5.24	467221	5.24	786135
5.25	31830.3	5.25	468808	5.25	786293
5.26	31986.4	5.26	467601	5.26	786764
5.27	32440.2	5.27	468225	5.27	786647
5.28	33149.8	5.28	468515	5.28	786061
5.29	31377.6	5.29	468463	5.29	785813
5.3	31268.6	5.3	468421	5.3	785848
5.31	31932.4	5.31	468878	5.31	786058
5.32	32431	5.32	468346	5.32	786017
5.33	31665.6	5.33	468967	5.33	786785
5.34	30810.6	5.34	468864	5.34	786755
5.35	31596.2	5.35	468522	5.35	786351
5.36	31544.1	5.36	469609	5.36	786692
5.37	31704.6	5.37	468183	5.37	786180
5.38	32515.4	5.38	468948	5.38	786194
5.39	32166.2	5.39	468950	5.39	785296
5.4	31908.2	5.4	468989	5.4	786821
5.41	31560.5	5.41	469660	5.41	785836
5.42	32002.1	5.42	469229	5.42	785465
5.43	31992.4	5.43	468779	5.43	786620
5.44	32351	5.44	469105	5.44	786768
5.45	32511.4	5.45	467631	5.45	786537
5.46	31923.6	5.46	468908	5.46	786322
5.47	32590.5	5.47	468675	5.47	785857
5.48	31584.7	5.48	468911	5.48	786936
5.49	32696.7	5.49	469001	5.49	786898
5.5	31766.8	5.5	467728	5.5	786725
5.51	31605.7	5.51	468879	5.51	787010
5.52	33011	5.52	468089	5.52	787075
5.53	31468.4	5.53	468161	5.53	786891
5.54	31480.6	5.54	468893	5.54	786431
5.55	31915	5.55	468679	5.55	786024
5.56	32856.2	5.56	468086	5.56	786139
5.57	32291.7	5.57	468647	5.57	786197
5.58	32373.4	5.58	468509	5.58	784655
5.59	32867.7	5.59	468512	5.59	786394
5.6	32307.8	5.6	468955	5.6	786334
5.61	32753.2	5.61	469181	5.61	786207
5.62	33441.1	5.62	468552	5.62	786801
5.63	33247.8	5.63	469811	5.63	786481
5.64	32957.3	5.64	469461	5.64	786245
5.65	33814.8	5.65	468771	5.65	786493
5.66	32909.2	5.66	469006	5.66	787423
5.67	34032.3	5.67	470111	5.67	786595
5.68	33919.3	5.68	469080	5.68	786912
5.69	33613.6	5.69	469388	5.69	786516
5.7	33211.9	5.7	469332	5.7	787684
5.71	32744.7	5.71	469016	5.71	786570
5.72	32917.3	5.72	469839	5.72	785604
5.73	32338.2	5.73	468729	5.73	785985
5.74	33127.3	5.74	468689	5.74	786803
5.75	32630.7	5.75	468778	5.75	786767
5.76	32194.7	5.76	469209	5.76	786119
5.77	33954.9	5.77	469518	5.77	786495
5.78	33490.4	5.78	469277	5.78	786817
5.79	33287.4	5.79	470101	5.79	787458
5.8	33790.8	5.8	468952	5.8	786325
5.81	33948.2	5.81	468633	5.81	786644
5.82	33174.8	5.82	468656	5.82	785981
5.83	32919.3	5.83	469292	5.83	786164
5.84	32775	5.84	469588	5.84	786977
5.85	33247.1	5.85	468899	5.85	787022
5.86	33653.7	5.86	469558	5.86	786229
5.87	33457.8	5.87	469965	5.87	786755
5.88	33370.6	5.88	470936	5.88	786744
5.89	33384.3	5.89	469260	5.89	787166
5.9	33213.8	5.9	468685	5.9	787416
5.91	33709.9	5.91	468902	5.91	787701
5.92	33893.4	5.92	469840	5.92	786482
5.93	33487.3	5.93	469961	5.93	787254
5.94	33839.1	5.94	469957	5.94	787204
5.95	34177.6	5.95	469677	5.95	787346
5.96	34000	5.96	468656	5.96	786516
5.97	33645.1	5.97	469108	5.97	787022
5.98	32823.7	5.98	469432	5.98	787771
5.99	33239.3	5.99	469440	5.99	786819
6	34626.6	6	469533	6	787294
6.01	34762.2	6.01	469672	6.01	787422
6.02	33677.9	6.02	469322	6.02	787064
6.03	34726.6	6.03	468718	6.03	787178
6.04	33955.8	6.04	469973	6.04	787359
6.05	33411.6	6.05	470162	6.05	787250
6.06	34205.6	6.06	469580	6.06	787480
6.07	34092.4	6.07	469839	6.07	787049
6.08	33929.3	6.08	469722	6.08	786687
6.09	34180.2	6.09	469463	6.09	786578
6.1	33792.2	6.1	469268	6.1	786349
6.11	34480.7	6.11	469893	6.11	786842
6.12	32886.4	6.12	470266	6.12	786916
6.13	34063.2	6.13	469399	6.13	787299
6.14	33939	6.14	469344	6.14	787498
6.15	35018	6.15	469818	6.15	788050
6.16	34240.1	6.16	469897	6.16	787398
6.17	34739.8	6.17	469651	6.17	786891
6.18	35337.9	6.18	470007	6.18	787157
6.19	34234.9	6.19	469821	6.19	788050
6.2	34917.2	6.2	469593	6.2	787021
6.21	34587.6	6.21	469599	6.21	787733
6.22	34802.2	6.22	470130	6.22	788160
6.23	34742.1	6.23	469238	6.23	786889
6.24	34167.1	6.24	470324	6.24	786840
6.25	33660.6	6.25	469690	6.25	787061
6.26	34030.9	6.26	470549	6.26	787384
6.27	34876.6	6.27	469426	6.27	787466
6.28	34812	6.28	469833	6.28	788182
6.29	35122.4	6.29	469392	6.29	787143
6.3	35751.9	6.3	469962	6.3	787273
6.31	34736.2	6.31	470750	6.31	787624
6.32	34717.3	6.32	469736	6.32	787247
6.33	35040.3	6.33	469847	6.33	788115
6.34	36165.2	6.34	470114	6.34	788103
6.35	35229.8	6.35	469467	6.35	787873
6.36	35823.2	6.36	470125	6.36	787679
6.37	36773.8	6.37	470835	6.37	788554
6.38	34999.5	6.38	470437	6.38	787621
6.39	35073.7	6.39	470220	6.39	787910
6.4	34975	6.4	470493	6.4	787429
6.41	36019.1	6.41	470136	6.41	787282
6.42	35898.2	6.42	471062	6.42	787664
6.43	36184.4	6.43	469532	6.43	788036
6.44	37101	6.44	470705	6.44	787467
6.45	36914.8	6.45	470186	6.45	788143
6.46	34920	6.46	471177	6.46	787709
6.47	34892.7	6.47	470481	6.47	788178
6.48	35362.4	6.48	470068	6.48	787762
6.49	35959.6	6.49	469875	6.49	787925
6.5	35162.6	6.5	470049	6.5	788279
6.51	35571.8	6.51	470959	6.51	787771
6.52	36885.4	6.52	470459	6.52	788881
6.53	36629.3	6.53	470020	6.53	787687
6.54	35842	6.54	470114	6.54	788075
6.55	35329.6	6.55	470382	6.55	788377
6.56	36101.1	6.56	470436	6.56	788546
6.57	36663.2	6.57	470872	6.57	789159
6.58	35887.7	6.58	470175	6.58	787901
6.59	36379.9	6.59	471796	6.59	788130
6.6	37391.7	6.6	471570	6.6	787131
6.61	35757.7	6.61	471207	6.61	788446
6.62	36839.5	6.62	470779	6.62	788322
6.63	37165.2	6.63	471473	6.63	787880
6.64	36928.7	6.64	471133	6.64	787634
6.65	36170.3	6.65	471529	6.65	788240
6.66	35897.6	6.66	469883	6.66	787887
6.67	36709.7	6.67	470295	6.67	787676
6.68	36746.1	6.68	470907	6.68	787275
6.69	36531.7	6.69	470730	6.69	787417
6.7	37192.8	6.7	470451	6.7	788324
6.71	37331.1	6.71	470277	6.71	788698
6.72	36646.4	6.72	471121	6.72	788201
6.73	36595.9	6.73	471259	6.73	787946
6.74	37733.5	6.74	470503	6.74	788052
6.75	35825.3	6.75	471424	6.75	787903
6.76	35644.6	6.76	470713	6.76	789307
6.77	37905.3	6.77	470545	6.77	788765
6.78	36956.9	6.78	471318	6.78	787682
6.79	37205.1	6.79	471190	6.79	787926
6.8	37778.2	6.8	470438	6.8	788353
6.81	36858.1	6.81	471451	6.81	788599
6.82	36533.7	6.82	469707	6.82	788163
6.83	37013.3	6.83	471331	6.83	787768
6.84	37459.4	6.84	471118	6.84	788889
6.85	37659.5	6.85	472432	6.85	789111
6.86	37626.7	6.86	471333	6.86	788327
6.87	37278.9	6.87	472035	6.87	788600
6.88	38221.3	6.88	471582	6.88	788461
6.89	39114.2	6.89	472232	6.89	787776
6.9	37303.6	6.9	472779	6.9	788597
6.91	38207.7	6.91	473012	6.91	789815
6.92	38206.9	6.92	471885	6.92	789153
6.93	38073.6	6.93	471430	6.93	789477
6.94	38821	6.94	473085	6.94	789713
6.95	39278.5	6.95	473283	6.95	790667
6.96	40004.7	6.96	473093	6.96	790468
6.97	40364.8	6.97	473523	6.97	789908
6.98	40762.1	6.98	474867	6.98	789730
6.99	40816.8	6.99	475165	6.99	790789
7	42609.7	7	475382	7	791156
7.01	43250	7.01	475605	7.01	792457
7.02	43238.8	7.02	477548	7.02	793168
7.03	45335	7.03	477951	7.03	793748
7.04	46278.4	7.04	478399	7.04	795147
7.05	48460.5	7.05	479818	7.05	795557
7.06	49317	7.06	481426	7.06	796648
7.07	51389.7	7.07	483099	7.07	798443
7.08	53284	7.08	484139	7.08	799727
7.09	56970.8	7.09	486400	7.09	801486
7.1	58936.9	7.1	490064	7.1	803173
7.11	62645.6	7.11	492726	7.11	805769
7.12	67779.9	7.12	494864	7.12	809219
7.13	71476.6	7.13	497547	7.13	812678
7.14	77691.1	7.14	502744	7.14	817207
7.15	84746.3	7.15	508648	7.15	824123
7.16	92966	7.16	516229	7.16	829596
7.17	104322	7.17	522539	7.17	838202
7.18	117290	7.18	531629	7.18	849951
7.19	137573	7.19	542998	7.19	862996
7.2	157881	7.2	559392	7.2	878459
7.21	184067	7.21	576770	7.21	900775
7.22	219200	7.22	596487	7.22	920928
7.23	255785	7.23	618125	7.23	936768
7.24	300562	7.24	647031	7.24	949779
7.25	340893	7.25	667985	7.25	961956
7.26	382924	7.26	690011	7.26	969402
7.27	409004	7.27	709484	7.27	978561
7.28	415553	7.28	721080	7.28	986063
7.29	400233	7.29	730768	7.29	984914
7.3	371271	7.3	726923	7.3	975316
7.31	349117	7.31	712204	7.31	949822
7.32	355049	7.32	688517	7.32	913763
7.33	368187	7.33	648796	7.33	882859
7.34	354966	7.34	603520	7.34	854267
7.35	303874	7.35	559656	7.35	832301
7.36	232852	7.36	527847	7.36	820535
7.37	163501	7.37	505853	7.37	809150
7.38	116130	7.38	493001	7.38	801354
7.39	85348.4	7.39	486360	7.39	797584
7.4	66539.4	7.4	482045	7.4	796565
7.41	58200.8	7.41	481766	7.41	793665
7.42	53338.1	7.42	478702	7.42	792763
7.43	49355.2	7.43	478224	7.43	793135
7.44	47296.1	7.44	477621	7.44	792415
7.45	47179.6	7.45	476819	7.45	792248
7.46	46886.4	7.46	477051	7.46	792356
7.47	46510.7	7.47	476691	7.47	793159
7.48	45295.8	7.48	476274	7.48	791696
7.49	44500	7.49	475816	7.49	790935
7.5	44546.5	7.5	475837	7.5	790786
7.51	45894.8	7.51	476369	7.51	791570
7.52	46355.9	7.52	475651	7.52	791018
7.53	44767.7	7.53	475326	7.53	792763
7.54	46233.9	7.54	475906	7.54	792518
7.55	45914.1	7.55	476148	7.55	791744
7.56	47607.2	7.56	477247	7.56	791545
7.57	47093.9	7.57	477010	7.57	793695
7.58	47497.3	7.58	477749	7.58	793006
7.59	48395.3	7.59	477871	7.59	791761
7.6	49180.7	7.6	477959	7.6	793297
7.61	49666.9	7.61	478871	7.61	794501
7.62	51275	7.62	478692	7.62	793829
7.63	50118.4	7.63	477718	7.63	794051
7.64	50499.8	7.64	478651	7.64	793951
7.65	51581.8	7.65	477772	7.65	793181
7.66	50273.2	7.66	478540	7.66	792890
7.67	49650	7.67	478592	7.67	793989
7.68	49761.2	7.68	478608	7.68	794130
7.69	50985.1	7.69	478842	7.69	793260
7.7	50674.7	7.7	478718	7.7	792707
7.71	50029	7.71	477980	7.71	792976
7.72	50716.1	7.72	478043	7.72	791948
7.73	49445.4	7.73	478814	7.73	793269
7.74	49760.5	7.74	478877	7.74	793016
7.75	50615.6	7.75	477906	7.75	792496
7.76	50467.8	7.76	477331	7.76	792826
7.77	48806.8	7.77	477893	7.77	791556
7.78	48245.9	7.78	477925	7.78	791771
7.79	48656	7.79	477552	7.79	792292
7.8	48577.7	7.8	477377	7.8	792903
7.81	49012	7.81	478495	7.81	792355
7.82	49124.7	7.82	477834	7.82	792350
7.83	48968.7	7.83	478393	7.83	792702
7.84	49420	7.84	478424	7.84	793357
7.85	49177.6	7.85	477006	7.85	793159
7.86	48245.8	7.86	476854	7.86	792660
7.87	49215.4	7.87	477701	7.87	792949
7.88	50304.2	7.88	477829	7.88	792837
7.89	49913.4	7.89	476629	7.89	793988
7.9	48650.6	7.9	477161	7.9	792320
7.91	49824.3	7.91	477852	7.91	792663
7.92	49802.3	7.92	477727	7.92	794025
7.93	48736.9	7.93	476177	7.93	791924
7.94	48625.6	7.94	476950	7.94	792568
7.95	49327.5	7.95	477712	7.95	792144
7.96	47765	7.96	478200	7.96	791564
7.97	49273.6	7.97	477509	7.97	792571
7.98	48265.4	7.98	477377	7.98	792003
7.99	47727.2	7.99	476507	7.99	791743
8	47901.3	8	477116	8	793254
8.01	47858.3	8.01	476159	8.01	792018
8.02	46900.9	8.02	476722	8.02	791990
8.03	48673.3	8.03	476204	8.03	791837
8.04	47233.9	8.04	476837	8.04	791126
8.05	47317.5	8.05	476813	8.05	790861
8.06	47326.3	8.06	476541	8.06	792445
8.07	46463	8.07	476557	8.07	791802
8.08	46452	8.08	475562	8.08	792177
8.09	47204.8	8.09	476516	8.09	791675
8.1	45854.8	8.1	476323	8.1	791307
8.11	45685.4	8.11	476788	8.11	791169
8.12	46871.7	8.12	477340	8.12	791006
8.13	47597	8.13	477200	8.13	792073
8.14	46645.9	8.14	476509	8.14	791509
8.15	48218.1	8.15	477221	8.15	792158
8.16	47228.9	8.16	475669	8.16	792601
8.17	47340.6	8.17	476566	8.17	791301
8.18	46902.1	8.18	476305	8.18	791396
8.19	44737.9	8.19	477034	8.19	791720
8.2	45574	8.2	476970	8.2	790681
8.21	47094.8	8.21	476796	8.21	790321
8.22	47449.9	8.22	476661	8.22	791992
8.23	47327.5	8.23	475560	8.23	791713
8.24	46184	8.24	476274	8.24	792030
8.25	46024.5	8.25	476102	8.25	791347
8.26	46434.2	8.26	476160	8.26	791568
8.27	46910.9	8.27	475974	8.27	791190
8.28	46882.8	8.28	475262	8.28	791599
8.29	47624.5	8.29	476671	8.29	791262
8.3	46209.9	8.3	476212	8.3	790907
8.31	46943.4	8.31	476479	8.31	790482
8.32	45787.8	8.32	476155	8.32	791752
8.33	46274.6	8.33	475115	8.33	792257
8.34	45357.2	8.34	474903	8.34	791977
8.35	46148.6	8.35	475016	8.35	790761
8.36	47494	8.36	476421	8.36	791338
8.37	47720.5	8.37	475410	8.37	791663
8.38	47746.3	8.38	476300	8.38	791707
8.39	46780.5	8.39	475483	8.39	791739
8.4	46798.9	8.4	477148	8.4	791081
8.41	46935.8	8.41	476405	8.41	792500
8.42	45573.2	8.42	476343	8.42	791463
8.43	44711.4	8.43	476316	8.43	790060
8.44	46206.4	8.44	475536	8.44	790954
8.45	45075.8	8.45	476064	8.45	791326
8.46	46391.3	8.46	476044	8.46	791505
8.47	45701.2	8.47	475881	8.47	791145
8.48	45478.8	8.48	475398	8.48	790968
8.49	45341.2	8.49	475590	8.49	790782
8.5	45551.4	8.5	475877	8.5	790372
8.51	45305.6	8.51	475006	8.51	790606
8.52	46278.8	8.52	476100	8.52	790579
8.53	46867.4	8.53	474937	8.53	790842
8.54	44567	8.54	475267	8.54	791837
8.55	45610.2	8.55	476006	8.55	791397
8.56	44580.9	8.56	475935	8.56	790076
8.57	44980	8.57	475463	8.57	791803
8.58	45438.5	8.58	475947	8.58	791538
8.59	45663.8	8.59	476046	8.59	791664
8.6	44221.3	8.6	477040	8.6	791183
8.61	44234.7	8.61	475052	8.61	790426
8.62	44218.7	8.62	475409	8.62	790540
8.63	45847.9	8.63	476410	8.63	790649
8.64	44452.4	8.64	475835	8.64	790964
8.65	46681.2	8.65	475207	8.65	790540
8.66	45252.8	8.66	474824	8.66	790659
8.67	45156.5	8.67	476437	8.67	790880
8.68	45631.9	8.68	474910	8.68	790746
8.69	43954.2	8.69	474967	8.69	790267
8.7	44938.6	8.7	476063	8.7	790753
8.71	45907.7	8.71	476115	8.71	791221
8.72	45159.3	8.72	476542	8.72	791895
8.73	44563.7	8.73	475653	8.73	790569
8.74	44976.9	8.74	475520	8.74	790435
8.75	46486.9	8.75	475750	8.75	790639
8.76	45748	8.76	474160	8.76	790855
8.77	46170.1	8.77	474998	8.77	790519
8.78	45644.9	8.78	476166	8.78	790555
8.79	45546.1	8.79	476074	8.79	790972
8.8	45041.4	8.8	475985	8.8	791678
8.81	44963	8.81	476196	8.81	791558
8.82	44581.2	8.82	474592	8.82	790571
8.83	45500.6	8.83	475252	8.83	791289
8.84	45396.7	8.84	475117	8.84	791066
8.85	45217.7	8.85	475051	8.85	791425
8.86	44896.8	8.86	474916	8.86	791801
8.87	45149.9	8.87	476101	8.87	790266
8.88	45573.8	8.88	474386	8.88	790177
8.89	45022.1	8.89	475479	8.89	789958
8.9	45865.3	8.9	475705	8.9	790266
8.91	46282	8.91	475207	8.91	790775
8.92	46346.9	8.92	475808	8.92	791061
8.93	45974.1	8.93	475251	8.93	791174
8.94	44410.1	8.94	474513	8.94	790434
8.95	45152.3	8.95	475452	8.95	790855
8.96	44784	8.96	475153	8.96	791381
8.97	44409.3	8.97	474985	8.97	790184
8.98	44804.9	8.98	474629	8.98	790937
8.99	46158.1	8.99	474984	8.99	790909
9	45764.6	9	474039	9	790226
9.01	45742.8	9.01	475093	9.01	790832
9.02	44312	9.02	475020	9.02	790662
9.03	45983.3	9.03	474837	9.03	790585
9.04	45125.2	9.04	474634	9.04	790352
9.05	45090.6	9.05	475586	9.05	791352
9.06	45690.5	9.06	475938	9.06	790967
9.07	45572.4	9.07	476103	9.07	789976
9.08	44991.2	9.08	475813	9.08	791233
9.09	43617.8	9.09	475536	9.09	790620
9.1	44062	9.1	474446	9.1	790680
9.11	44686.6	9.11	474861	9.11	791070
9.12	45413.8	9.12	476057	9.12	790937
9.13	44976.7	9.13	474968	9.13	789820
9.14	45413	9.14	475569	9.14	790709
9.15	45304.5	9.15	474594	9.15	790511
9.16	45440.5	9.16	474437	9.16	791109
9.17	45306.2	9.17	475111	9.17	790235
9.18	44777.5	9.18	475103	9.18	791048
9.19	45414.1	9.19	474423	9.19	790793
9.2	44324.7	9.2	475278	9.2	790288
9.21	44599.3	9.21	474954	9.21	790436
9.22	45004.4	9.22	475168	9.22	790026
9.23	45661.4	9.23	475003	9.23	791061
9.24	46347.1	9.24	474968	9.24	790538
9.25	45658.1	9.25	474848	9.25	790715
9.26	44916.2	9.26	474642	9.26	790666
9.27	45148.6	9.27	474915	9.27	791006
9.28	44505.7	9.28	475976	9.28	789538
9.29	44923.9	9.29	475767	9.29	791463
9.3	45350.5	9.3	474827	9.3	790535
9.31	45068.1	9.31	474980	9.31	789976
9.32	45030.1	9.32	475682	9.32	791165
9.33	45513.4	9.33	474608	9.33	790945
9.34	46029.6	9.34	473538	9.34	789701
9.35	44770.1	9.35	475016	9.35	791049
9.36	45613.5	9.36	474953	9.36	790177
9.37	46082.7	9.37	476092	9.37	790132
9.38	45431.8	9.38	476104	9.38	790744
9.39	45075.8	9.39	474248	9.39	790144
9.4	45207.7	9.4	475019	9.4	790517
9.41	46255.8	9.41	475067	9.41	791227
9.42	44680.1	9.42	474244	9.42	790056
9.43	45108.8	9.43	475062	9.43	790735
9.44	44845.8	9.44	475133	9.44	790280
9.45	44887.7	9.45	474841	9.45	790342
9.46	45075	9.46	474946	9.46	789630
9.47	45365.1	9.47	474414	9.47	790493
9.48	46840.6	9.48	475463	9.48	791475
9.49	46216.3	9.49	475010	9.49	790817
9.5	45555.6	9.5	475144	9.5	790724
9.51	44738.6	9.51	475066	9.51	791213
9.52	45064	9.52	475289	9.52	791493
9.53	44858.4	9.53	474456	9.53	791055
9.54	46138.9	9.54	475026	9.54	791004
9.55	46787.1	9.55	475911	9.55	791382
9.56	47738.6	9.56	474547	9.56	791166
9.57	44475.8	9.57	475417	9.57	791297
9.58	46552.8	9.58	475287	9.58	790949
9.59	46035.9	9.59	474939	9.59	790868
9.6	45049.9	9.6	474950	9.6	790606
9.61	47103.8	9.61	475166	9.61	790022
9.62	45798	9.62	475075	9.62	790288
9.63	46126.4	9.63	475127	9.63	790035
9.64	47301	9.64	474921	9.64	790371
9.65	46365.3	9.65	475124	9.65	791573
9.66	45522.4	9.66	474435	9.66	791063
9.67	47148.1	9.67	474573	9.67	790647
9.68	45359.9	9.68	474554	9.68	790635
9.69	45922.5	9.69	475071	9.69	791530
9.7	45918.9	9.7	474119	9.7	790615
9.71	46348.8	9.71	475211	9.71	790754
9.72	45963.8	9.72	475494	9.72	789921
9.73	46458.9	9.73	474448	9.73	790750
9.74	46878.2	9.74	475211	9.74	791161
9.75	45882.8	9.75	474646	9.75	791070
9.76	45415	9.76	474762	9.76	790251
9.77	46407.2	9.77	475665	9.77	790795
9.78	46103.3	9.78	476325	9.78	790514
9.79	45804.4	9.79	476011	9.79	790517
9.8	46058.8	9.8	475186	9.8	791462
9.81	45916.2	9.81	475619	9.81	791495
9.82	45929.9	9.82	476332	9.82	790512
9.83	46729.5	9.83	474095	9.83	790591
9.84	45798.2	9.84	474738	9.84	790909
9.85	44781.7	9.85	475802	9.85	791508
9.86	46527.9	9.86	475325	9.86	790587
9.87	46187.4	9.87	475805	9.87	790622
9.88	46692.9	9.88	476334	9.88	790931
9.89	46091	9.89	474911	9.89	791151
9.9	45300.1	9.9	474642	9.9	790186
9.91	44883.4	9.91	474418	9.91	790541
9.92	45017.3	9.92	477035	9.92	791131
9.93	46881.3	9.93	475762	9.93	790408
9.94	46993.7	9.94	475019	9.94	791004
9.95	47374.7	9.95	475182	9.95	791113
9.96	46631	9.96	474790	9.96	791564
9.97	46539.8	9.97	475283	9.97	791196
9.98	47003.2	9.98	476006	9.98	791362
9.99	44928.7	9.99	475659	9.99	791783
10	45899.2	10	475082	10	791611
10.01	47048.6	10.01	476149	10.01	791991
10.02	44798.4	10.02	475286	10.02	791565
10.03	46268.2	10.03	475872	10.03	791476
10.04	46939.3	10.04	475425	10.04	792194
10.05	47062.8	10.05	474999	10.05	791809
10.06	46497.4	10.06	475267	10.06	791631
10.07	46889	10.07	476480	10.07	791336
10.08	48112.6	10.08	476954	10.08	790740
10.09	48101.9	10.09	476679	10.09	791590
10.1	48294.4	10.1	477471	10.1	792632
10.11	48497.7	10.11	477014	10.11	792434
10.12	48707.9	10.12	476680	10.12	791881
10.13	48276.4	10.13	476744	10.13	793309
10.14	48400.2	10.14	476603	10.14	792635
10.15	47923.6	10.15	476281	10.15	792817
10.16	48590.1	10.16	478181	10.16	793644
10.17	51103.1	10.17	477385	10.17	792952
10.18	51865.9	10.18	477242	10.18	795260
10.19	52436.9	10.19	478473	10.19	795088
10.2	56114.2	10.2	479866	10.2	796484
10.21	55331	10.21	479359	10.21	797215
10.22	59807.9	10.22	482131	10.22	797782
10.23	62793	10.23	485035	10.23	800700
10.24	67087.6	10.24	487174	10.24	804160
10.25	71582.1	10.25	489460	10.25	807087
10.26	78966.3	10.26	493904	10.26	810356
10.27	86104	10.27	497066	10.27	813096
10.28	94691	10.28	502721	10.28	817148
10.29	100490	10.29	506090	10.29	819310
10.3	106993	10.3	510444	10.3	822537
10.31	111044	10.31	515307	10.31	821648
10.32	113052	10.32	517714	10.32	824030
10.33	104574	10.33	517591	10.33	821933
10.34	99037.6	10.34	517665	10.34	820191
10.35	90683.7	10.35	515357	10.35	817346
10.36	81599.7	10.36	511564	10.36	811935
10.37	79311.3	10.37	505284	10.37	806786
10.38	74512.2	10.38	501092	10.38	801736
10.39	71730.2	10.39	493702	10.39	798898
10.4	66604	10.4	486170	10.4	795681
10.41	61874.2	10.41	482338	10.41	793707
10.42	56212.6	10.42	479758	10.42	792441
10.43	53648.2	10.43	478611	10.43	791999
10.44	51865.1	10.44	477670	10.44	792988
10.45	49375.8	10.45	477174	10.45	792765
10.46	48889.3	10.46	476838	10.46	791782
10.47	47950.4	10.47	476081	10.47	791206
10.48	48019.5	10.48	476196	10.48	791469
10.49	47725.8	10.49	476343	10.49	791245
10.5	48478.9	10.5	476385	10.5	791438
10.51	48444	10.51	475900	10.51	791151
10.52	47885	10.52	476351	10.52	791902
10.53	48446	10.53	476135	10.53	792104
10.54	49102.1	10.54	476069	10.54	791559
10.55	49284.8	10.55	475387	10.55	791304
10.56	48592.6	10.56	476073	10.56	791607
10.57	48423.7	10.57	475775	10.57	791653
10.58	47531.9	10.58	476105	10.58	792539
10.59	48024.9	10.59	475366	10.59	791099
10.6	47355.5	10.6	475673	10.6	792164
10.61	47764.3	10.61	476283	10.61	792539
10.62	47247.2	10.62	474742	10.62	791948
10.63	47619.7	10.63	476131	10.63	790701
10.64	48743	10.64	476375	10.64	791964
10.65	47575.2	10.65	475684	10.65	791035
10.66	47662.8	10.66	475403	10.66	791253
10.67	47223.2	10.67	476823	10.67	792212
10.68	48316.4	10.68	475979	10.68	792027
10.69	47423	10.69	475738	10.69	791204
10.7	48102.4	10.7	476391	10.7	791830
10.71	48968.5	10.71	477007	10.71	791772
10.72	46899.7	10.72	476568	10.72	791127
10.73	48437.7	10.73	476179	10.73	790787
10.74	48567.5	10.74	476105	10.74	792198
10.75	49421	10.75	476095	10.75	792010
10.76	47290.9	10.76	476934	10.76	792570
10.77	48181.6	10.77	475873	10.77	792200
10.78	48204.1	10.78	476170	10.78	791970
10.79	48967.4	10.79	476386	10.79	792173
10.8	49467	10.8	476322	10.8	791749
10.81	48069.3	10.81	476631	10.81	791758
10.82	46965.6	10.82	476950	10.82	792550
10.83	47960.3	10.83	475992	10.83	791861
10.84	49073.7	10.84	476477	10.84	792254
10.85	49353.7	10.85	475967	10.85	792451
10.86	49992.3	10.86	476471	10.86	792464
10.87	48503.1	10.87	477226	10.87	791913
10.88	49409.4	10.88	476632	10.88	792906
10.89	49171.7	10.89	477355	10.89	790960
10.9	49197.3	10.9	476226	10.9	791829
10.91	48420.9	10.91	475859	10.91	792375
10.92	47818.9	10.92	477157	10.92	793020
10.93	47531.4	10.93	476636	10.93	793314
10.94	48617.9	10.94	475611	10.94	791917
10.95	47944.7	10.95	476071	10.95	792691
10.96	48131.9	10.96	476000	10.96	792373
10.97	49145.8	10.97	476274	10.97	792137
10.98	50325.7	10.98	476685	10.98	792083
10.99	48481.1	10.99	475454	10.99	791707
11	46929.4	11	476697	11	793054
11.01	48468	11.01	476505	11.01	792041
11.02	48803	11.02	476170	11.02	792879
11.03	48602	11.03	475905	11.03	792098
11.04	48603.6	11.04	476112	11.04	791858
11.05	48282.7	11.05	475706	11.05	791651
11.06	47674.8	11.06	476215	11.06	792248
11.07	47780.4	11.07	476052	11.07	791359
11.08	47394.5	11.08	476489	11.08	792384
11.09	48917.3	11.09	476342	11.09	792303
11.1	50174.1	11.1	476726	11.1	792625
11.11	50698	11.11	476433	11.11	792845
11.12	48636	11.12	476624	11.12	793571
11.13	49936.4	11.13	477193	11.13	792071
11.14	50436.2	11.14	477413	11.14	792414
11.15	49192.2	11.15	476038	11.15	792588
11.16	48228	11.16	477163	11.16	792218
11.17	49374.9	11.17	477569	11.17	792436
11.18	48350.4	11.18	476389	11.18	793095
11.19	49224.5	11.19	477456	11.19	791697
11.2	51087	11.2	477014	11.2	792056
11.21	50788.3	11.21	476670	11.21	792524
11.22	49822.1	11.22	475319	11.22	793017
11.23	48293.5	11.23	476541	11.23	793569
11.24	48808.2	11.24	475687	11.24	791456
11.25	50152.8	11.25	476561	11.25	793190
11.26	48594.3	11.26	476173	11.26	792931
11.27	48756.4	11.27	477151	11.27	791901
11.28	48927.7	11.28	477229	11.28	792530
11.29	48926.8	11.29	477421	11.29	791826
11.3	47745.6	11.3	476656	11.3	792075
11.31	49164.4	11.31	478283	11.31	792946
11.32	48644.3	11.32	477758	11.32	791211
11.33	49751.2	11.33	476680	11.33	791954
11.34	49214.6	11.34	476627	11.34	793133
11.35	49426.1	11.35	475332	11.35	792780
11.36	49516.4	11.36	475625	11.36	792369
11.37	49895.9	11.37	476898	11.37	792025
11.38	49336.2	11.38	476595	11.38	792652
11.39	49486	11.39	476954	11.39	792156
11.4	49875.6	11.4	477334	11.4	793198
11.41	49110.7	11.41	477724	11.41	793054
11.42	50419.1	11.42	476303	11.42	792466
11.43	50289.8	11.43	476770	11.43	792812
11.44	49553.6	11.44	476478	11.44	792249
11.45	48038.2	11.45	476745	11.45	793081
11.46	49337.1	11.46	477114	11.46	792866
11.47	48534.6	11.47	477081	11.47	791156
11.48	48933.2	11.48	476337	11.48	792666
11.49	49519.6	11.49	476214	11.49	791890
11.5	50059.4	11.5	476533	11.5	792603
11.51	50024.6	11.51	477485	11.51	792514
11.52	47661	11.52	477079	11.52	792621
11.53	50003.2	11.53	476850	11.53	792556
11.54	49979.8	11.54	476460	11.54	792980
11.55	49184.5	11.55	475465	11.55	792804
11.56	48168.7	11.56	476028	11.56	792609
11.57	48932.2	11.57	477292	11.57	792376
11.58	49500.2	11.58	476916	11.58	791473
11.59	50654.5	11.59	476629	11.59	793392
11.6	48846.8	11.6	476561	11.6	792934
11.61	48942.1	11.61	477823	11.61	792301
11.62	49091.4	11.62	477898	11.62	792140
11.63	49259.4	11.63	475849	11.63	792909
11.64	48682.8	11.64	477606	11.64	792555
11.65	49450.8	11.65	477003	11.65	791740
11.66	48917.4	11.66	477577	11.66	793886
11.67	48163.6	11.67	477078	11.67	792259
11.68	49090.7	11.68	478312	11.68	792143
11.69	48706.7	11.69	476020	11.69	793332
11.7	49330.4	11.7	476685	11.7	791805
11.71	47968.8	11.71	478187	11.71	793065
11.72	48831.3	11.72	477842	11.72	792454
11.73	50979.4	11.73	476602	11.73	793678
11.74	49148.5	11.74	477136	11.74	792904
11.75	49544.6	11.75	477101	11.75	791872
11.76	48635.1	11.76	476196	11.76	792780
11.77	48852.8	11.77	477318	11.77	793186
11.78	49190.8	11.78	476075	11.78	792957
11.79	49766.1	11.79	478077	11.79	792066
11.8	48561	11.8	476483	11.8	792529
11.81	47965.8	11.81	476438	11.81	792530
11.82	50126.7	11.82	476099	11.82	792631
11.83	49465.1	11.83	476801	11.83	792737
11.84	49012.9	11.84	476697	11.84	792933
11.85	49392	11.85	477445	11.85	792332
11.86	49382.5	11.86	477581	11.86	792588
11.87	48684.7	11.87	476396	11.87	792558
11.88	49189.5	11.88	476701	11.88	792359
11.89	50425.4	11.89	476932	11.89	793241
11.9	50153.5	11.9	477211	11.9	792303
11.91	49360.6	11.91	477575	11.91	793041
11.92	49940.9	11.92	477230	11.92	791887
11.93	48687.5	11.93	477626	11.93	793155
11.94	48510.1	11.94	477104	11.94	793589
11.95	47669.7	11.95	477217	11.95	792770
11.96	48983.1	11.96	477311	11.96	792501
11.97	51203.2	11.97	476765	11.97	792239
11.98	49254.4	11.98	476384	11.98	792515
11.99	49878.5	11.99	477613	11.99	792753
12	49508.5	12	476701	12	792827
12.01	47917.6	12.01	476300	12.01	793806
12.02	48737.5	12.02	477147	12.02	794115
12.03	49286.5	12.03	477338	12.03	792239
12.04	48936.7	12.04	477090	12.04	792745
12.05	49038.3	12.05	477236	12.05	792671
12.06	49210.8	12.06	477261	12.06	793484
12.07	48178.8	12.07	477821	12.07	793652
12.08	48819.6	12.08	477288	12.08	793234
12.09	48950.6	12.09	476740	12.09	792508
12.1	50175	12.1	477515	12.1	792102
12.11	48716.8	12.11	477119	12.11	793567
12.12	48809.5	12.12	476736	12.12	792737
12.13	49782.6	12.13	477593	12.13	792915
12.14	49402.8	12.14	476128	12.14	793318
12.15	49309	12.15	477077	12.15	792871
12.16	50211.8	12.16	478781	12.16	793170
12.17	49904.9	12.17	477953	12.17	794210
12.18	48904.6	12.18	477703	12.18	792953
12.19	49790.1	12.19	477285	12.19	793369
12.2	49316.6	12.2	477788	12.2	792113
12.21	50418.9	12.21	477524	12.21	792925
12.22	50038.9	12.22	477153	12.22	792578
12.23	50514.3	12.23	477161	12.23	793092
12.24	49798.9	12.24	477438	12.24	793263
12.25	50384.5	12.25	478137	12.25	793807
12.26	51502.7	12.26	477582	12.26	793709
12.27	50011.1	12.27	477903	12.27	794024
12.28	51205.7	12.28	478107	12.28	793161
12.29	51840.4	12.29	478300	12.29	793218
12.3	51585.3	12.3	478262	12.3	794483
12.31	51045.9	12.31	478897	12.31	793720
12.32	51210.7	12.32	479014	12.32	793566
12.33	50549.3	12.33	477527	12.33	793546
12.34	50645.2	12.34	477141	12.34	793973
12.35	50896.1	12.35	478899	12.35	792875
12.36	52419.7	12.36	478722	12.36	794054
12.37	50838.3	12.37	477775	12.37	794937
12.38	49888.7	12.38	479101	12.38	794100
12.39	50094.8	12.39	478941	12.39	793871
12.4	51160.3	12.4	478726	12.4	794747
12.41	51414.8	12.41	478097	12.41	794944
12.42	51329.8	12.42	479127	12.42	794753
12.43	51542.2	12.43	479044	12.43	794357
12.44	51363	12.44	479974	12.44	794119
12.45	51622.1	12.45	478486	12.45	794349
12.46	52163.1	12.46	480206	12.46	795847
12.47	52722.8	12.47	480782	12.47	796202
12.48	54557.7	12.48	480594	12.48	796157
12.49	54226.3	12.49	481201	12.49	797344
12.5	54751.9	12.5	482749	12.5	797844
12.51	57534.8	12.51	483118	12.51	799208
12.52	60455	12.52	483528	12.52	800055
12.53	63389	12.53	485546	12.53	801214
12.54	66891.4	12.54	487103	12.54	804076
12.55	71924.9	12.55	488763	12.55	807402
12.56	78044.6	12.56	493077	12.56	812833
12.57	89572.7	12.57	499882	12.57	815777
12.58	103120	12.58	503837	12.58	824159
12.59	116206	12.59	510418	12.59	831585
12.6	135730	12.6	519821	12.6	842519
12.61	154706	12.61	529236	12.61	849370
12.62	179297	12.62	540520	12.62	857363
12.63	194223	12.63	554811	12.63	863906
12.64	207921	12.64	562556	12.64	869608
12.65	212437	12.65	571768	12.65	870311
12.66	208846	12.66	578084	12.66	872124
12.67	194280	12.67	583285	12.67	874941
12.68	174498	12.68	584704	12.68	869398
12.69	150393	12.69	581551	12.69	859994
12.7	132854	12.7	571161	12.7	848138
12.71	120044	12.71	559281	12.71	836835
12.72	108247	12.72	543756	12.72	825128
12.73	97099.1	12.73	528463	12.73	814640
12.74	86890.6	12.74	515624	12.74	807261
12.75	78471.3	12.75	503527	12.75	802572
12.76	69828.6	12.76	494228	12.76	799436
12.77	63913.7	12.77	488050	12.77	797036
12.78	59914.2	12.78	484963	12.78	797170
12.79	55952.2	12.79	482578	12.79	796143
12.8	52733.4	12.8	482432	12.8	794687
12.81	52935	12.81	481439	12.81	794648
12.82	51703.8	12.82	481490	12.82	795192
12.83	51506.1	12.83	480715	12.83	795263
12.84	50916	12.84	479826	12.84	794758
12.85	50567.5	12.85	480462	12.85	794321
12.86	49824.6	12.86	479250	12.86	794389
12.87	49907.3	12.87	480585	12.87	794344
12.88	51306.2	12.88	479861	12.88	794687
12.89	49903.2	12.89	479923	12.89	795179
12.9	51071.8	12.9	479685	12.9	794970
12.91	50341.4	12.91	478934	12.91	793219
12.92	50529.8	12.92	478307	12.92	794563
12.93	50904.9	12.93	479651	12.93	793160
12.94	50450	12.94	478897	12.94	794108
12.95	49749.2	12.95	479660	12.95	794757
12.96	51002.8	12.96	479019	12.96	793327
12.97	49447.8	12.97	479041	12.97	793985
12.98	51491.9	12.98	478937	12.98	793981
12.99	51433.9	12.99	478254	12.99	793530
13	50451.9	13	477938	13	793057
13.01	51386.2	13.01	479175	13.01	793010
13.02	49541.6	13.02	477986	13.02	793677
13.03	49644	13.03	478737	13.03	793943
13.04	49449.5	13.04	478506	13.04	794094
13.05	50668.5	13.05	478842	13.05	793353
13.06	49884.9	13.06	479482	13.06	794225
13.07	50833.9	13.07	478821	13.07	793910
13.08	49616.2	13.08	478711	13.08	793446
13.09	50178	13.09	478819	13.09	794485
13.1	49069.9	13.1	478564	13.1	793629
13.11	50196.3	13.11	479798	13.11	794703
13.12	51307.7	13.12	479689	13.12	793271
13.13	50936.3	13.13	478488	13.13	793828
13.14	50577	13.14	478813	13.14	794016
13.15	49827.6	13.15	477974	13.15	793480
13.16	51084.1	13.16	477996	13.16	793452
13.17	50402.6	13.17	480124	13.17	794461
13.18	52455.8	13.18	478840	13.18	793300
13.19	50044.5	13.19	479487	13.19	794468
13.2	49618.2	13.2	478320	13.2	793510
13.21	49681.9	13.21	480080	13.21	793478
13.22	50053.1	13.22	479742	13.22	794933
13.23	49942.5	13.23	478993	13.23	794228
13.24	51065.5	13.24	479499	13.24	794027
13.25	51499.4	13.25	479823	13.25	793604
13.26	51841	13.26	480460	13.26	793541
13.27	50648.2	13.27	478107	13.27	793861
13.28	51841.2	13.28	478798	13.28	793957
13.29	50440.1	13.29	478360	13.29	794006
13.3	51465.4	13.3	480456	13.3	794484
13.31	53228.4	13.31	479319	13.31	794718
13.32	51455.4	13.32	479325	13.32	795019
13.33	50175.1	13.33	478177	13.33	794980
13.34	50542	13.34	478749	13.34	794383
13.35	51797.1	13.35	479322	13.35	794302
13.36	50984.7	13.36	479543	13.36	793701
13.37	50241.8	13.37	480328	13.37	793542
13.38	50921.7	13.38	479480	13.38	793755
13.39	50801.1	13.39	479911	13.39	794307
13.4	51440.6	13.4	479772	13.4	794311
13.41	51416.3	13.41	480320	13.41	794496
13.42	52056.8	13.42	479391	13.42	794747
13.43	50174.6	13.43	478995	13.43	793978
13.44	51613.1	13.44	479631	13.44	794433
13.45	51351.7	13.45	479054	13.45	793858
13.46	51285.5	13.46	478672	13.46	793475
13.47	50591.4	13.47	477367	13.47	793772
13.48	50695.7	13.48	479082	13.48	794490
13.49	52518.4	13.49	479810	13.49	793956
13.5	51987	13.5	478935	13.5	794199
13.51	51545.5	13.51	478631	13.51	793396
13.52	50773.9	13.52	479524	13.52	794011
13.53	50820.8	13.53	478609	13.53	794704
13.54	51205.3	13.54	480198	13.54	794496
13.55	51695.3	13.55	479983	13.55	794116
13.56	51343.2	13.56	479271	13.56	794232
13.57	51999.3	13.57	479615	13.57	794534
13.58	50250.9	13.58	478885	13.58	794761
13.59	51226.3	13.59	478469	13.59	794111
13.6	51158	13.6	479119	13.6	794280
13.61	51140.1	13.61	479278	13.61	794294
13.62	51570.7	13.62	479386	13.62	793654
13.63	49193.9	13.63	479428	13.63	794795
13.64	50068.6	13.64	479116	13.64	795257
13.65	49983.5	13.65	479463	13.65	795587
13.66	51057.8	13.66	480213	13.66	794542
13.67	51903.3	13.67	479768	13.67	794433
13.68	50230.6	13.68	479249	13.68	795199
13.69	49413.7	13.69	479284	13.69	794763
13.7	50805.5	13.7	478276	13.7	794259
13.71	51279.5	13.71	479925	13.71	795446
13.72	51002.6	13.72	479003	13.72	794663
13.73	51728.7	13.73	478882	13.73	794265
13.74	49258	13.74	479059	13.74	794926
13.75	51170.7	13.75	479132	13.75	794374
13.76	51986.7	13.76	480327	13.76	794535
13.77	50539.8	13.77	479516	13.77	794364
13.78	50318.2	13.78	479448	13.78	794230
13.79	50691.4	13.79	480057	13.79	794779
13.8	51541.2	13.8	479355	13.8	794252
13.81	50036.6	13.81	480091	13.81	794187
13.82	50061	13.82	480006	13.82	794351
13.83	50876.5	13.83	479732	13.83	794211
13.84	50455.7	13.84	480213	13.84	794049
13.85	49985	13.85	479672	13.85	793158
13.86	50516.5	13.86	479192	13.86	794928
13.87	50885.9	13.87	479834	13.87	794850
13.88	50316	13.88	479600	13.88	794613
13.89	50913.5	13.89	479704	13.89	794146
13.9	50137.5	13.9	479617	13.9	794196
13.91	50558.2	13.91	479879	13.91	794148
13.92	50286.3	13.92	479681	13.92	794291
13.93	50786.7	13.93	479161	13.93	794681
13.94	51247.1	13.94	478738	13.94	794119
13.95	51119.2	13.95	481040	13.95	793649
13.96	50319.4	13.96	480845	13.96	794557
13.97	50575.1	13.97	479286	13.97	795096
13.98	50375.8	13.98	479824	13.98	794253
13.99	49759.3	13.99	480339	13.99	794983
14	50646.7	14	478826	14	793959
14.01	51048.9	14.01	478308	14.01	793786
14.02	50714.6	14.02	479689	14.02	794282
14.03	50866.3	14.03	479106	14.03	793938
14.04	50273.1	14.04	478822	14.04	794673
14.05	51311.2	14.05	479038	14.05	793335
14.06	49870.3	14.06	479817	14.06	794061
14.07	51863.3	14.07	479750	14.07	794176
14.08	50158.6	14.08	479587	14.08	793960
14.09	52123.9	14.09	479080	14.09	793333
14.1	50865.3	14.1	478866	14.1	795019
14.11	50457.1	14.11	479135	14.11	795391
14.12	50755.2	14.12	479395	14.12	794671
14.13	50472.7	14.13	479785	14.13	793942
14.14	50155.2	14.14	479721	14.14	794774
14.15	50270.6	14.15	478342	14.15	793947
14.16	50356.2	14.16	479150	14.16	793609
14.17	51802.8	14.17	479892	14.17	794924
14.18	49771.2	14.18	479666	14.18	793546
14.19	50371.8	14.19	480234	14.19	794584
14.2	51938.9	14.2	479783	14.2	794789
14.21	50091.6	14.21	479705	14.21	794849
14.22	51103.6	14.22	480238	14.22	794424
14.23	50955.4	14.23	479173	14.23	794117
14.24	50600.2	14.24	480495	14.24	793984
14.25	50500.6	14.25	478642	14.25	793564
14.26	50113.1	14.26	478841	14.26	793479
14.27	51438.7	14.27	478623	14.27	793789
14.28	49309.4	14.28	479158	14.28	794371
14.29	50479.1	14.29	480325	14.29	794520
14.3	50732.9	14.3	479572	14.3	794669
14.31	49846.2	14.31	479187	14.31	794763
14.32	49578	14.32	479472	14.32	794823
14.33	51241.4	14.33	479540	14.33	794551
14.34	49425.2	14.34	479433	14.34	794409
14.35	50435.7	14.35	480152	14.35	794191
14.36	50690.4	14.36	479551	14.36	794889
14.37	49288.2	14.37	479523	14.37	794566
14.38	51143.8	14.38	479906	14.38	796171
14.39	50810.3	14.39	480104	14.39	794998
14.4	49934.3	14.4	479162	14.4	793511
14.41	50391.6	14.41	479513	14.41	794839
14.42	50356.2	14.42	479113	14.42	794463
14.43	51639.6	14.43	480470	14.43	794158
14.44	50799.1	14.44	480402	14.44	794156
14.45	51082	14.45	480216	14.45	795207
14.46	50978.2	14.46	480524	14.46	794807
14.47	50963.4	14.47	481591	14.47	794968
14.48	50990.1	14.48	480612	14.48	795006
14.49	50639.6	14.49	479424	14.49	794726
14.5	51858.8	14.5	480905	14.5	795900
14.51	50981	14.51	480730	14.51	795280
14.52	53677.3	14.52	481454	14.52	795603
14.53	53557.9	14.53	481128	14.53	797303
14.54	54523.2	14.54	482326	14.54	796892
14.55	55993.5	14.55	482286	14.55	797860
14.56	57049.4	14.56	482655	14.56	797652
14.57	60550.6	14.57	484004	14.57	799713
14.58	63089.3	14.58	485365	14.58	800732
14.59	65157.1	14.59	486120	14.59	801486
14.6	67892.7	14.6	488426	14.6	803088
14.61	67549.8	14.61	487342	14.61	801622
14.62	69444.5	14.62	489873	14.62	804736
14.63	71019.5	14.63	492387	14.63	804846
14.64	68600	14.64	494106	14.64	803766
14.65	67820	14.65	492875	14.65	803100
14.66	63665.4	14.66	494597	14.66	803569
14.67	61841.3	14.67	494026	14.67	802775
14.68	57045.1	14.68	491005	14.68	800945
14.69	56265.3	14.69	489475	14.69	799894
14.7	54317	14.7	488221	14.7	797370
14.71	54217.1	14.71	485142	14.71	796593
14.72	52215.7	14.72	484706	14.72	795982
14.73	52809.3	14.73	482926	14.73	795713
14.74	51622.6	14.74	481639	14.74	795933
14.75	51177.9	14.75	481632	14.75	795045
14.76	51081.8	14.76	482917	14.76	794066
14.77	50219.7	14.77	480108	14.77	795521
14.78	49011.2	14.78	480014	14.78	794800
14.79	49955.6	14.79	479701	14.79	794784
14.8	48925.5	14.8	480428	14.8	794843
14.81	49284	14.81	479530	14.81	794103
14.82	49212.6	14.82	480361	14.82	794768
14.83	49828.3	14.83	480463	14.83	793880
14.84	49827.2	14.84	480429	14.84	794348
14.85	51544.8	14.85	479437	14.85	793381
14.86	50848.7	14.86	480260	14.86	794546
14.87	50856.6	14.87	481378	14.87	795025
14.88	49710.4	14.88	479847	14.88	795470
14.89	48933.9	14.89	478997	14.89	793981
14.9	48886	14.9	479931	14.9	794456
14.91	48995.4	14.91	480715	14.91	794892
14.92	50603	14.92	480514	14.92	794559
14.93	50123.5	14.93	479618	14.93	794117
14.94	49895.7	14.94	480114	14.94	795077
14.95	49846.7	14.95	481197	14.95	794225
14.96	49948.8	14.96	479738	14.96	794577
14.97	50210.4	14.97	479915	14.97	795195
14.98	50019.2	14.98	479506	14.98	794565
14.99	50621.5	14.99	479875	14.99	793748
15	49936.5	15	481152	15	793540
15.01	51012.5	15.01	480638	15.01	793938
15.02	50255.4	15.02	479415	15.02	794244
15.03	50941.6	15.03	479575	15.03	793565
15.04	50860.8	15.04	479555	15.04	793433
15.05	50162.5	15.05	480678	15.05	792896
15.06	50061.1	15.06	480168	15.06	794425
15.07	50485.3	15.07	480047	15.07	795224
15.08	50293.1	15.08	479618	15.08	794208
15.09	50277.8	15.09	480498	15.09	793945
15.1	49349.1	15.1	479938	15.1	794896
15.11	49243	15.11	480227	15.11	793694
15.12	49941.1	15.12	480240	15.12	794313
15.13	50661.7	15.13	478576	15.13	795003
15.14	49929	15.14	479250	15.14	794175
15.15	49335.2	15.15	480645	15.15	793648
15.16	50662.6	15.16	479781	15.16	794967
15.17	49531.7	15.17	478828	15.17	793854
15.18	48999	15.18	480652	15.18	794343
15.19	49544.4	15.19	480077	15.19	794615
15.2	49114.8	15.2	480503	15.2	794142
15.21	50732.1	15.21	478702	15.21	794151
15.22	49269.2	15.22	478918	15.22	794040
15.23	49264.9	15.23	479401	15.23	794464
15.24	49246.1	15.24	480234	15.24	793924
15.25	50321.3	15.25	480324	15.25	793800
15.26	48724.8	15.26	479907	15.26	794137
15.27	49161.7	15.27	480020	15.27	793797
15.28	50789.6	15.28	479218	15.28	794086
15.29	50494	15.29	479083	15.29	794649
15.3	49912.1	15.3	479926	15.3	794534
15.31	50408.2	15.31	480220	15.31	793580
15.32	50748.5	15.32	480582	15.32	794011
15.33	48870.4	15.33	479676	15.33	794170
15.34	49889.5	15.34	479243	15.34	794940
15.35	49692.4	15.35	479502	15.35	795127
15.36	51054.7	15.36	479593	15.36	793424
15.37	49139.7	15.37	479154	15.37	795053
15.38	50082.4	15.38	480090	15.38	794450
15.39	49532.8	15.39	481055	15.39	794206
15.4	49257.7	15.4	480244	15.4	793205
15.41	51125.1	15.41	479801	15.41	794291
15.42	49820.1	15.42	479915	15.42	793624
15.43	50706.1	15.43	480784	15.43	794172
15.44	48742.8	15.44	480703	15.44	794424
15.45	50122	15.45	479984	15.45	794418
15.46	51012.4	15.46	480255	15.46	793192
15.47	51197.5	15.47	480484	15.47	794229
15.48	50377.7	15.48	481655	15.48	795006
15.49	50442.9	15.49	479679	15.49	794146
15.5	50268.1	15.5	480234	15.5	794433
15.51	49719.2	15.51	480435	15.51	793217
15.52	49352.8	15.52	479425	15.52	794732
15.53	48617.2	15.53	479362	15.53	793872
15.54	49275.9	15.54	480757	15.54	794922
15.55	48921.8	15.55	480694	15.55	793886
15.56	49067.7	15.56	479103	15.56	793472
15.57	50007.1	15.57	480169	15.57	794464
15.58	50262.5	15.58	479160	15.58	794432
15.59	50254.1	15.59	479410	15.59	793309
15.6	49284	15.6	479685	15.6	794425
15.61	49239.7	15.61	479929	15.61	795177
15.62	50915.9	15.62	479641	15.62	794858
15.63	50447.3	15.63	479957	15.63	793922
15.64	48660.6	15.64	479995	15.64	794465
15.65	49091.8	15.65	480289	15.65	793543
15.66	49141.7	15.66	480256	15.66	794714
15.67	49061.3	15.67	479465	15.67	794837
15.68	48979.4	15.68	480336	15.68	794744
15.69	51165.9	15.69	479441	15.69	794349
15.7	49564.5	15.7	481042	15.7	795000
15.71	49299.2	15.71	480340	15.71	795043
15.72	49701.8	15.72	479879	15.72	794178
15.73	50597.7	15.73	481457	15.73	794275
15.74	49893.2	15.74	480851	15.74	794556
15.75	48739	15.75	480234	15.75	794414
15.76	48667	15.76	480330	15.76	794207
15.77	49336.7	15.77	480837	15.77	793262
15.78	50382.5	15.78	481514	15.78	794236
15.79	49641.1	15.79	480477	15.79	794869
15.8	49822.7	15.8	480005	15.8	795308
15.81	50340.6	15.81	480947	15.81	795097
15.82	49651.5	15.82	480851	15.82	794285
15.83	50382	15.83	481087	15.83	792967
15.84	49163.2	15.84	479756	15.84	795041
15.85	48784.6	15.85	480242	15.85	793715
15.86	48987.8	15.86	480048	15.86	795084
15.87	49175.3	15.87	480883	15.87	794281
15.88	50409.4	15.88	480204	15.88	794602
15.89	49102.5	15.89	480648	15.89	794140
15.9	49414.3	15.9	480527	15.9	794438
15.91	50751.4	15.91	480934	15.91	795719
15.92	50374.5	15.92	480125	15.92	794484
15.93	50466.6	15.93	480848	15.93	794821
15.94	50076.9	15.94	480315	15.94	794242
15.95	49161.3	15.95	479983	15.95	794942
15.96	49742.4	15.96	480092	15.96	794710
15.97	49636.2	15.97	480604	15.97	795018
15.98	49370.3	15.98	480493	15.98	794854
15.99	49628.2	15.99	480252	15.99	795106
16	50784.1	16	480112	16	795547
16.01	50888.5	16.01	480919	16.01	794490
16.02	49843.3	16.02	480179	16.02	794044
16.03	50321.2	16.03	480524	16.03	794007
16.04	49136.6	16.04	480200	16.04	794481
16.05	48232.4	16.05	482220	16.05	793732
16.06	49677.7	16.06	481254	16.06	794248
16.07	49600.7	16.07	480451	16.07	794238
16.08	49261.7	16.08	480788	16.08	793848
16.09	50833.3	16.09	480190	16.09	794947
16.1	50359.7	16.1	479952	16.1	795138
16.11	49629.8	16.11	481005	16.11	794539
16.12	50124.8	16.12	481577	16.12	794751
16.13	50058.1	16.13	481391	16.13	794593
16.14	49902.7	16.14	480406	16.14	795073
16.15	50821.2	16.15	480208	16.15	794564
16.16	49742.2	16.16	480807	16.16	795065
16.17	50052.4	16.17	481120	16.17	795049
16.18	50330	16.18	481112	16.18	795234
16.19	51237.6	16.19	482467	16.19	794742
16.2	51499.5	16.2	480705	16.2	794221
16.21	51074.2	16.21	480313	16.21	795306
16.22	49873	16.22	481170	16.22	794953
16.23	50086	16.23	482004	16.23	796568
16.24	51987.2	16.24	480309	16.24	796622
16.25	51331.6	16.25	481508	16.25	795124
16.26	51768.2	16.26	483014	16.26	795994
16.27	52894	16.27	482317	16.27	796484
16.28	54990.6	16.28	481540	16.28	796986
16.29	57387.1	16.29	483360	16.29	798369
16.3	58658.9	16.3	483208	16.3	799151
16.31	60785.9	16.31	486194	16.31	800438
16.32	63808	16.32	486594	16.32	800561
16.33	68299.6	16.33	488183	16.33	802003
16.34	73054.4	16.34	490372	16.34	804568
16.35	75296	16.35	491734	16.35	805414
16.36	75858.8	16.36	494602	16.36	805816
16.37	76164.9	16.37	496871	16.37	806507
16.38	76609.2	16.38	497763	16.38	808165
16.39	71806.8	16.39	497350	16.39	807326
16.4	68954.2	16.4	497885	16.4	807024
16.41	64918.5	16.41	497974	16.41	805752
16.42	62273.6	16.42	498314	16.42	804716
16.43	59505	16.43	495142	16.43	802455
16.44	56120.7	16.44	494618	16.44	801005
16.45	53803.4	16.45	491369	16.45	800338
16.46	52002.8	16.46	488198	16.46	799125
16.47	51461.9	16.47	485938	16.47	795491
16.48	51966.5	16.48	484425	16.48	795993
16.49	51039.7	16.49	483600	16.49	795418
16.5	48738.7	16.5	482697	16.5	794660
16.51	49991.6	16.51	481706	16.51	795430
16.52	49967.8	16.52	481709	16.52	794822
16.53	50712.4	16.53	480982	16.53	794439
16.54	48619.9	16.54	480909	16.54	794906
16.55	49738.3	16.55	482370	16.55	794217
16.56	50499.8	16.56	481486	16.56	794860
16.57	49917.8	16.57	480957	16.57	794926
16.58	49258.6	16.58	480185	16.58	794175
16.59	50682.6	16.59	480675	16.59	794541
16.6	49845.5	16.6	481940	16.6	794413
16.61	49115.7	16.61	481348	16.61	793740
16.62	49272	16.62	480723	16.62	794115
16.63	50535.1	16.63	480176	16.63	794867
16.64	51758.4	16.64	481992	16.64	793922
16.65	50214.3	16.65	480713	16.65	795185
16.66	49443.1	16.66	480235	16.66	794236
16.67	49606.6	16.67	480385	16.67	795015
16.68	49352.6	16.68	481014	16.68	794137
16.69	49041.1	16.69	481676	16.69	793696
16.7	49889.6	16.7	480684	16.7	794338
16.71	49555	16.71	482037	16.71	795454
16.72	50661.2	16.72	480208	16.72	794947
16.73	48801.1	16.73	480319	16.73	794944
16.74	49354.4	16.74	480413	16.74	795004
16.75	49602.6	16.75	481414	16.75	794836
16.76	49125.7	16.76	481326	16.76	794652
16.77	49983.5	16.77	480410	16.77	795322
16.78	50564.6	16.78	480965	16.78	794681
16.79	49254.6	16.79	480587	16.79	795402
16.8	48969.4	16.8	480722	16.8	794675
16.81	49291.3	16.81	479817	16.81	793934
16.82	49977.8	16.82	481132	16.82	794498
16.83	49937.1	16.83	480795	16.83	794654
16.84	50134.2	16.84	479626	16.84	794010
16.85	48983.9	16.85	481286	16.85	794630
16.86	49371.7	16.86	481109	16.86	795248
16.87	50176.2	16.87	480393	16.87	795390
16.88	50573.7	16.88	480898	16.88	794569
16.89	49984.1	16.89	481815	16.89	794621
16.9	50002.2	16.9	482401	16.9	793716
16.91	48941.5	16.91	481236	16.91	794830
16.92	48361.3	16.92	480036	16.92	794777
16.93	51120	16.93	480163	16.93	794454
16.94	51070.2	16.94	480416	16.94	794726
16.95	49368.6	16.95	480826	16.95	794127
16.96	48436.9	16.96	481045	16.96	794992
16.97	50180.1	16.97	480432	16.97	794966
16.98	49611.7	16.98	480560	16.98	793107
16.99	49467.7	16.99	481090	16.99	794263
17	49751	17	480782	17	793965
17.01	49746.2	17.01	480851	17.01	793028
17.02	49805.6	17.02	480871	17.02	795737
17.03	50131.7	17.03	480356	17.03	794993
17.04	50262.5	17.04	480770	17.04	795632
17.05	50726.7	17.05	480652	17.05	795509
17.06	48835.1	17.06	481545	17.06	795396
17.07	50186.5	17.07	480098	17.07	794719
17.08	50821.9	17.08	479666	17.08	794614
17.09	50525	17.09	481248	17.09	794756
17.1	48172.7	17.1	480691	17.1	794061
17.11	50425.7	17.11	480967	17.11	793960
17.12	50390	17.12	481601	17.12	794360
17.13	49789.1	17.13	479879	17.13	793598
17.14	50138.7	17.14	481778	17.14	794323
17.15	50364	17.15	480816	17.15	794286
17.16	49242.1	17.16	481479	17.16	795500
17.17	49678.2	17.17	481775	17.17	795008
17.18	51506.4	17.18	481154	17.18	794551
17.19	49696.8	17.19	481309	17.19	794081
17.2	49285.8	17.2	481771	17.2	794022
17.21	50029.2	17.21	480896	17.21	795086
17.22	51284.1	17.22	481876	17.22	794521
17.23	49542.3	17.23	481688	17.23	794415
17.24	49895	17.24	481214	17.24	793838
17.25	50640	17.25	481492	17.25	794212
17.26	50813.8	17.26	481616	17.26	794523
17.27	49425.8	17.27	481232	17.27	794643
17.28	48676.9	17.28	480613	17.28	794551
17.29	49614.2	17.29	480645	17.29	794337
17.3	50161.4	17.3	481399	17.3	794561
17.31	49704.4	17.31	481805	17.31	794661
17.32	49964.9	17.32	482862	17.32	794767
17.33	48552.9	17.33	481302	17.33	793840
17.34	49897.5	17.34	479986	17.34	795093
17.35	50516.5	17.35	481499	17.35	795295
17.36	50529.2	17.36	481035	17.36	794858
17.37	51069.2	17.37	481144	17.37	794549
17.38	51040.2	17.38	480545	17.38	795075
17.39	50049.9	17.39	482274	17.39	795582
17.4	50489.2	17.4	481580	17.4	794073
17.41	50009.1	17.41	481781	17.41	794621
17.42	51132.3	17.42	481780	17.42	795377
17.43	50270.3	17.43	481540	17.43	794940
17.44	49205	17.44	482011	17.44	794523
17.45	49348.6	17.45	480822	17.45	794417
17.46	50017.8	17.46	480401	17.46	795971
17.47	50959.5	17.47	481004	17.47	795272
17.48	50844.6	17.48	481185	17.48	795641
17.49	49506.7	17.49	480812	17.49	795915
17.5	51004	17.5	480413	17.5	795352
17.51	50524.8	17.51	481782	17.51	794158
17.52	50476.3	17.52	481510	17.52	794365
17.53	50233.3	17.53	481081	17.53	794369
17.54	50042.4	17.54	480475	17.54	794423
17.55	50918.4	17.55	481426	17.55	795136
17.56	49085.9	17.56	481381	17.56	795441
17.57	49887.2	17.57	481797	17.57	794629
17.58	49445	17.58	481898	17.58	795393
17.59	50158.5	17.59	481542	17.59	794799
17.6	50008.8	17.6	482189	17.6	794688
17.61	50006.5	17.61	481120	17.61	795600
17.62	49001.2	17.62	481684	17.62	794984
17.63	51019.2	17.63	483670	17.63	796184
17.64	49804.2	17.64	482320	17.64	794743
17.65	50610	17.65	482638	17.65	795407
17.66	50912.7	17.66	481134	17.66	795687
17.67	49773.5	17.67	481629	17.67	796187
17.68	50974.8	17.68	481468	17.68	795344
17.69	51479.3	17.69	481623	17.69	794783
17.7	50088.7	17.7	481889	17.7	794366
17.71	50334.8	17.71	481090	17.71	794669
17.72	49766	17.72	481141	17.72	795016
17.73	51296.7	17.73	481485	17.73	794349
17.74	50462.5	17.74	483035	17.74	795793
17.75	50995.9	17.75	482822	17.75	795690
17.76	51835.8	17.76	482323	17.76	795710
17.77	51180.1	17.77	482154	17.77	795835
17.78	51158.6	17.78	483212	17.78	795801
17.79	52228.3	17.79	483762	17.79	795527
17.8	52541.2	17.8	483517	17.8	796957
17.81	51909.2	17.81	483511	17.81	797406
17.82	53741.7	17.82	483578	17.82	796714
17.83	53833.5	17.83	483968	17.83	796942
17.84	57929.6	17.84	485561	17.84	796668
17.85	59225.1	17.85	487156	17.85	798321
17.86	62512.3	17.86	486501	17.86	801317
17.87	65119.8	17.87	488560	17.87	801310
17.88	71659.5	17.88	490243	17.88	803240
17.89	79516.8	17.89	493249	17.89	807161
17.9	87631.1	17.9	498682	17.9	809591
17.91	96592.5	17.91	501593	17.91	813653
17.92	104773	17.92	505687	17.92	816753
17.93	114469	17.93	510804	17.93	820411
17.94	120262	17.94	514957	17.94	823415
17.95	121105	17.95	519177	17.95	825861
17.96	117922	17.96	522977	17.96	826765
17.97	110507	17.97	526816	17.97	828433
17.98	101154	17.98	527836	17.98	828543
17.99	92024.7	17.99	527501	17.99	828115
18	84357.9	18	527338	18	822374
18.01	76313.9	18.01	521849	18.01	818196
18.02	69509.8	18.02	518212	18.02	812947
18.03	64148.6	18.03	510951	18.03	809024
18.04	58905.8	18.04	504942	18.04	805777
18.05	53976.4	18.05	498328	18.05	803553
18.06	53492	18.06	494426	18.06	799701
18.07	52469.6	18.07	491958	18.07	798602
18.08	52301.9	18.08	488492	18.08	796808
18.09	51646.3	18.09	486228	18.09	797984
18.1	51498.5	18.1	483838	18.1	797476
18.11	50785.2	18.11	483993	18.11	796553
18.12	50549	18.12	482854	18.12	796431
18.13	50080.9	18.13	483919	18.13	795634
18.14	50110.1	18.14	481860	18.14	795354
18.15	49628.8	18.15	482244	18.15	795562
18.16	50409.2	18.16	482892	18.16	795763
18.17	49690	18.17	483778	18.17	794657
18.18	50708.5	18.18	481305	18.18	795828
18.19	50183.4	18.19	480910	18.19	795118
18.2	50025	18.2	482524	18.2	795114
18.21	51328.6	18.21	482744	18.21	796070
18.22	50049.6	18.22	481470	18.22	795807
18.23	51202.7	18.23	482164	18.23	795524
18.24	50737.8	18.24	482125	18.24	795591
18.25	52116.2	18.25	482144	18.25	796395
18.26	51660.6	18.26	481530	18.26	795648
18.27	50869.1	18.27	481839	18.27	794815
18.28	49120.4	18.28	482313	18.28	795953
18.29	50369.6	18.29	482299	18.29	795901
18.3	50343.4	18.3	482882	18.3	794887
18.31	49998.5	18.31	481085	18.31	794999
18.32	50326.6	18.32	481659	18.32	794465
18.33	49467.7	18.33	480978	18.33	794663
18.34	50644.8	18.34	481468	18.34	795126
18.35	49428.9	18.35	481678	18.35	795165
18.36	50902.9	18.36	481049	18.36	795256
18.37	50448.3	18.37	481598	18.37	794325
18.38	49777.5	18.38	481997	18.38	794132
18.39	50226.1	18.39	481255	18.39	793837
18.4	49813	18.4	482035	18.4	795853
18.41	51313	18.41	483691	18.41	794588
18.42	50531.6	18.42	481027	18.42	795806
18.43	49856	18.43	479748	18.43	795988
18.44	50030.6	18.44	481388	18.44	794289
18.45	48818.1	18.45	480779	18.45	795256
18.46	50462.2	18.46	483786	18.46	795044
18.47	48713.9	18.47	481363	18.47	794065
18.48	49497.7	18.48	481189	18.48	795120
18.49	50774	18.49	481967	18.49	795128
18.5	50928.6	18.5	481478	18.5	795509
18.51	50374.4	18.51	480949	18.51	795484
18.52	50235	18.52	482187	18.52	795385
18.53	49643.2	18.53	482293	18.53	794774
18.54	49899	18.54	481502	18.54	794803
18.55	49660	18.55	482093	18.55	795873
18.56	50510.4	18.56	480452	18.56	794653
18.57	51305.4	18.57	481379	18.57	794844
18.58	50478.7	18.58	481727	18.58	796118
18.59	49016.6	18.59	481840	18.59	794781
18.6	51660.9	18.6	481718	18.6	794786
18.61	49894.4	18.61	482287	18.61	795285
18.62	50694.5	18.62	481438	18.62	795117
18.63	49847.2	18.63	482082	18.63	795934
18.64	49219.8	18.64	482241	18.64	795063
18.65	50161.9	18.65	481887	18.65	797484
18.66	51240.2	18.66	481894	18.66	796591
18.67	49980.8	18.67	482241	18.67	794685
18.68	49050.5	18.68	482178	18.68	795025
18.69	50394.1	18.69	481772	18.69	795372
18.7	49783.8	18.7	481807	18.7	796101
18.71	50486.7	18.71	482091	18.71	796068
18.72	50219	18.72	482824	18.72	795443
18.73	50260	18.73	481064	18.73	795990
18.74	50422.9	18.74	481489	18.74	795285
18.75	50503	18.75	482908	18.75	796980
18.76	50196.7	18.76	482797	18.76	795956
18.77	51508.8	18.77	483801	18.77	795521
18.78	51158.1	18.78	483176	18.78	795308
18.79	51880.7	18.79	482617	18.79	795164
18.8	51315.6	18.8	481391	18.8	795246
18.81	50998.6	18.81	482080	18.81	796181
18.82	50802.8	18.82	482819	18.82	796727
18.83	50480.8	18.83	483066	18.83	795985
18.84	49880.1	18.84	483139	18.84	795238
18.85	49960.2	18.85	482617	18.85	795579
18.86	50333.5	18.86	482547	18.86	795106
18.87	51050.4	18.87	482269	18.87	795172
18.88	49528.7	18.88	481884	18.88	795984
18.89	49328.7	18.89	481051	18.89	795405
18.9	50636.1	18.9	482949	18.9	795700
18.91	50063	18.91	481950	18.91	795810
18.92	50246	18.92	482787	18.92	794957
18.93	50278.8	18.93	482411	18.93	795459
18.94	50658.6	18.94	482007	18.94	795353
18.95	50467.2	18.95	482704	18.95	794766
18.96	50826.1	18.96	481175	18.96	794674
18.97	49819.5	18.97	482772	18.97	796305
18.98	51102	18.98	482436	18.98	795907
18.99	50428.1	18.99	482482	18.99	795188
19	50886.7	19	483935	19	795068
19.01	50036	19.01	481651	19.01	796319
19.02	49031.9	19.02	481973	19.02	796789
19.03	51081	19.03	481488	19.03	795969
19.04	51489.5	19.04	482764	19.04	795887
19.05	49960.4	19.05	482798	19.05	795212
19.06	50275.5	19.06	481343	19.06	796799
19.07	49979.1	19.07	481208	19.07	796593
19.08	49850.6	19.08	481985	19.08	796100
19.09	50138.9	19.09	482094	19.09	796053
19.1	48840.8	19.1	481886	19.1	795537
19.11	49422.3	19.11	481652	19.11	796134
19.12	49303.9	19.12	482673	19.12	795718
19.13	50568.2	19.13	481302	19.13	795569
19.14	50338.8	19.14	482352	19.14	796155
19.15	49647.9	19.15	481999	19.15	795573
19.16	50423.3	19.16	482105	19.16	795602
19.17	50583	19.17	481530	19.17	796280
19.18	50455.9	19.18	483376	19.18	796122
19.19	49906.8	19.19	481562	19.19	796184
19.2	50494.7	19.2	482468	19.2	796153
19.21	49863.2	19.21	482273	19.21	795546
19.22	49946.4	19.22	482191	19.22	795263
19.23	50001.2	19.23	482820	19.23	795883
19.24	50890.7	19.24	481822	19.24	795444
19.25	50613.3	19.25	482991	19.25	795726
19.26	50076.2	19.26	482841	19.26	795526
19.27	48966.3	19.27	482661	19.27	795157
19.28	49281.7	19.28	482286	19.28	795556
19.29	49678.9	19.29	482127	19.29	796492
19.3	49592.2	19.3	482140	19.3	797402
19.31	50547.6	19.31	483704	19.31	795582
19.32	52315.3	19.32	482831	19.32	795801
19.33	52113.8	19.33	481964	19.33	796575
19.34	52922.6	19.34	483409	19.34	796110
19.35	53204.8	19.35	483643	19.35	797168
19.36	53606.6	19.36	484069	19.36	797661
19.37	55027.8	19.37	484819	19.37	798055
19.38	55342.2	19.38	485795	19.38	798960
19.39	56655.6	19.39	485463	19.39	798260
19.4	56193.4	19.4	486508	19.4	799041
19.41	56213.9	19.41	486536	19.41	798071
19.42	55437.9	19.42	486840	19.42	798893
19.43	54483.6	19.43	486328	19.43	798659
19.44	54716.8	19.44	487462	19.44	798142
19.45	55290.4	19.45	487388	19.45	798790
19.46	53770.4	19.46	485825	19.46	798465
19.47	53011.1	19.47	486233	19.47	797960
19.48	52233.6	19.48	485161	19.48	799129
19.49	51822.8	19.49	483862	19.49	797079
19.5	51319.5	19.5	484157	19.5	796402
19.51	50659.4	19.51	483173	19.51	796551
19.52	49822.4	19.52	483646	19.52	796811
19.53	50297.1	19.53	482349	19.53	796648
19.54	51017.5	19.54	482777	19.54	795949
19.55	51352.3	19.55	482477	19.55	795883
19.56	50285.2	19.56	481424	19.56	796930
19.57	49850.7	19.57	482801	19.57	796925
19.58	50450.8	19.58	482314	19.58	795512
19.59	50804.8	19.59	482108	19.59	795864
19.6	50397.4	19.6	481756	19.6	795373
19.61	50435.7	19.61	482440	19.61	796294
19.62	50310.7	19.62	481582	19.62	796679
19.63	49371.5	19.63	481638	19.63	795850
19.64	49213.5	19.64	482256	19.64	796720
19.65	49250.9	19.65	482200	19.65	795277
19.66	50193.9	19.66	481999	19.66	796462
19.67	49019.3	19.67	481891	19.67	796464
19.68	49919.4	19.68	482185	19.68	795116
19.69	49793.7	19.69	483286	19.69	794892
19.7	50889.8	19.7	483262	19.7	795552
19.71	50717.6	19.71	482187	19.71	795009
19.72	50135.5	19.72	482357	19.72	794649
19.73	50045.1	19.73	482731	19.73	796296
19.74	49429.3	19.74	482803	19.74	795884
19.75	51018.9	19.75	481498	19.75	795814
19.76	50283.4	19.76	482340	19.76	796338
19.77	49178.1	19.77	481859	19.77	795787
19.78	49692.8	19.78	481874	19.78	795758
19.79	50145.9	19.79	481813	19.79	795381
19.8	49142.5	19.8	482529	19.8	796154
19.81	50362.1	19.81	483229	19.81	796724
19.82	49440.5	19.82	482147	19.82	796880
19.83	48798.2	19.83	482333	19.83	796184
19.84	49493.8	19.84	482256	19.84	796279
19.85	51304.4	19.85	481283	19.85	796466
19.86	50142	19.86	482525	19.86	796139
19.87	50798.2	19.87	482178	19.87	795716
19.88	50305.6	19.88	483190	19.88	795938
19.89	50552.1	19.89	482092	19.89	796453
19.9	49202.9	19.9	482264	19.9	796277
19.91	51103.6	19.91	482954	19.91	796545
19.92	50924.1	19.92	482167	19.92	796486
19.93	50170.6	19.93	483422	19.93	797048
19.94	50009.9	19.94	482548	19.94	796854
19.95	51174	19.95	482281	19.95	796576
19.96	50688.8	19.96	482765	19.96	796410
19.97	49812.4	19.97	483328	19.97	796093
19.98	50261	19.98	481338	19.98	795895
19.99	49541.5	19.99	482863	19.99	797007
20	49987.5	20	482123	20	796186
20.01	50650.1	20.01	482461	20.01	796181
20.02	49637.8	20.02	481855	20.02	796939
20.03	49896.5	20.03	481127	20.03	796258
20.04	50603.4	20.04	481276	20.04	795799
20.05	49227.4	20.05	482037	20.05	796985
20.06	49555	20.06	482968	20.06	796135
20.07	50470.6	20.07	483113	20.07	796094
20.08	49368.3	20.08	481894	20.08	796097
20.09	49207.3	20.09	482372	20.09	796258
20.1	50034.3	20.1	482540	20.1	796236
20.11	49348.6	20.11	482508	20.11	796056
20.12	49532.2	20.12	483168	20.12	796077
20.13	51324.8	20.13	481814	20.13	795707
20.14	51154	20.14	481877	20.14	795515
20.15	49510.6	20.15	482900	20.15	795454
20.16	49804.8	20.16	481997	20.16	795975
20.17	49389.8	20.17	481905	20.17	796172
20.18	51171.5	20.18	481840	20.18	796459
20.19	49645.9	20.19	482517	20.19	796930
20.2	49716.3	20.2	482702	20.2	796169
20.21	49704.1	20.21	481825	20.21	795056
20.22	49887.8	20.22	482575	20.22	795156
20.23	50048	20.23	482023	20.23	795299
20.24	49570.8	20.24	482582	20.24	796115
20.25	49497.5	20.25	481104	20.25	795818
20.26	49476.2	20.26	483360	20.26	796749
20.27	50455.6	20.27	481977	20.27	797812
20.28	50592.8	20.28	481390	20.28	796335
20.29	50272.6	20.29	482351	20.29	796219
20.3	51554.8	20.3	482149	20.3	796454
20.31	49543.6	20.31	482776	20.31	795748
20.32	49328.7	20.32	483631	20.32	797150
20.33	49792.7	20.33	483592	20.33	796067
20.34	49953.2	20.34	483129	20.34	795951
20.35	50117.4	20.35	483519	20.35	796602
20.36	50087.5	20.36	483310	20.36	796046
20.37	48831.6	20.37	483201	20.37	796581
20.38	50214.2	20.38	482544	20.38	796179
20.39	50312.4	20.39	482289	20.39	796105
20.4	50644.5	20.4	482591	20.4	796346
20.41	49952.2	20.41	482127	20.41	797347
20.42	48839.6	20.42	481323	20.42	796825
20.43	48664.3	20.43	481563	20.43	796194
20.44	50519.9	20.44	482026	20.44	796087
20.45	49426.5	20.45	482292	20.45	796198
20.46	49967.1	20.46	482756	20.46	796700
20.47	48506.7	20.47	482869	20.47	796017
20.48	49071	20.48	482705	20.48	795399
20.49	50211.2	20.49	481297	20.49	795646
20.5	50104.6	20.5	482138	20.5	795541
20.51	51114.9	20.51	482989	20.51	796264
20.52	51837.7	20.52	483562	20.52	797451
20.53	49181.7	20.53	482692	20.53	796162
20.54	49684.1	20.54	482963	20.54	795621
20.55	50138.8	20.55	482150	20.55	796028
20.56	48708.5	20.56	481372	20.56	796578
20.57	48693	20.57	482318	20.57	795817
20.58	49901.5	20.58	483327	20.58	796830
20.59	51027.9	20.59	482211	20.59	795646
20.6	49756.3	20.6	483460	20.6	796612
20.61	48681.3	20.61	482190	20.61	795697
20.62	48723.1	20.62	482088	20.62	796122
20.63	49068.9	20.63	482191	20.63	796282
20.64	49310.4	20.64	483229	20.64	796682
20.65	49297.6	20.65	482636	20.65	795960
20.66	50286	20.66	481990	20.66	797145
20.67	48941.2	20.67	481351	20.67	797125
20.68	49003.1	20.68	483043	20.68	796505
20.69	49514.4	20.69	483612	20.69	796256
20.7	52391.5	20.7	482495	20.7	795468
20.71	50362.6	20.71	484075	20.71	797015
20.72	50230.6	20.72	483068	20.72	796559
20.73	51378.2	20.73	482779	20.73	796783
20.74	50862	20.74	481564	20.74	796894
20.75	51578.8	20.75	482001	20.75	797458
20.76	50724	20.76	482617	20.76	797595
20.77	51031.9	20.77	484039	20.77	797967
20.78	51194.6	20.78	484479	20.78	796789
20.79	51614.6	20.79	482708	20.79	797054
20.8	50793.4	20.8	482000	20.8	797807
20.81	50625.1	20.81	483553	20.81	796703
20.82	52080.3	20.82	482805	20.82	798116
20.83	49960.4	20.83	483548	20.83	797918
20.84	50320.2	20.84	482906	20.84	796714
20.85	50593.3	20.85	482686	20.85	796998
20.86	48830.6	20.86	482556	20.86	796930
20.87	49013.1	20.87	483112	20.87	796515
20.88	49051	20.88	483081	20.88	796282
20.89	50459.1	20.89	481700	20.89	796343
20.9	49698	20.9	481475	20.9	796775
20.91	49981.8	20.91	481337	20.91	795927
20.92	49471.4	20.92	483276	20.92	795356
20.93	50338.1	20.93	483981	20.93	795773
20.94	49798	20.94	482465	20.94	795399
20.95	50694.6	20.95	481902	20.95	797934
20.96	50891.3	20.96	482609	20.96	795753
20.97	49240	20.97	483330	20.97	796769
20.98	49716.9	20.98	482768	20.98	796305
20.99	50007.7	20.99	482038	20.99	797890
21	50386.4	21	482660	21	796318
21.01	50075.3	21.01	482195	21.01	796194
21.02	49147.7	21.02	483732	21.02	797287
21.03	48822.1	21.03	483756	21.03	796559
21.04	50141.5	21.04	481985	21.04	796108
21.05	49944.3	21.05	482559	21.05	795936
21.06	48714.6	21.06	482263	21.06	796954
21.07	49522.3	21.07	482868	21.07	796788
21.08	49487.1	21.08	483503	21.08	796751
21.09	50360.3	21.09	481540	21.09	796659
21.1	51339.1	21.1	482361	21.1	796953
21.11	50859.1	21.11	484504	21.11	795820
21.12	50702	21.12	482929	21.12	796316
21.13	49873.7	21.13	483547	21.13	796203
21.14	50675.8	21.14	483184	21.14	797363
21.15	50772.2	21.15	482286	21.15	796324
21.16	49967.7	21.16	483785	21.16	796193
21.17	50722.4	21.17	483306	21.17	796659
21.18	50321.8	21.18	482008	21.18	796608
21.19	50439.6	21.19	483031	21.19	796642
21.2	49302.3	21.2	482699	21.2	796306
21.21	49176.3	21.21	483068	21.21	796816
21.22	49105	21.22	483116	21.22	796450
21.23	51207.8	21.23	483706	21.23	796774
21.24	49790.9	21.24	482867	21.24	797032
21.25	49816.8	21.25	482300	21.25	796867
21.26	49492.3	21.26	482802	21.26	796868
21.27	49952.4	21.27	482996	21.27	796846
21.28	49793.9	21.28	482295	21.28	796339
21.29	50801.2	21.29	482830	21.29	796387
21.3	49454.7	21.3	482661	21.3	796575
21.31	49817.3	21.31	482505	21.31	796766
21.32	50218.2	21.32	481976	21.32	797702
21.33	50692.4	21.33	482646	21.33	797495
21.34	49981	21.34	482844	21.34	797126
21.35	49283.4	21.35	483123	21.35	796026
21.36	50985.2	21.36	482844	21.36	796581
21.37	50255.4	21.37	482991	21.37	797875
21.38	50291.7	21.38	482630	21.38	796927
21.39	50899.4	21.39	482284	21.39	796362
21.4	49608.2	21.4	482368	21.4	797479
21.41	50058.7	21.41	481686	21.41	796631
21.42	49807.8	21.42	481886	21.42	797112
21.43	49465.9	21.43	483051	21.43	797172
21.44	50019	21.44	481586	21.44	796791
21.45	50936.9	21.45	481703	21.45	796766
21.46	50109.1	21.46	482983	21.46	796892
21.47	50155.7	21.47	483268	21.47	796773
21.48	50340.1	21.48	482479	21.48	796626
21.49	50123	21.49	482492	21.49	797218
21.5	50441	21.5	482245	21.5	796055
21.51	50251.9	21.51	482371	21.51	797221
21.52	50321.3	21.52	482016	21.52	797030
21.53	49931.5	21.53	481364	21.53	796285
21.54	49784	21.54	481987	21.54	796837
21.55	50859.8	21.55	483368	21.55	797310
21.56	49422	21.56	483201	21.56	798067
21.57	49871.8	21.57	482554	21.57	796277
21.58	51597.6	21.58	483107	21.58	796205
21.59	49057.6	21.59	482743	21.59	797182
21.6	50509.9	21.6	482533	21.6	797093
21.61	50639.1	21.61	481352	21.61	796825
21.62	51442.1	21.62	481897	21.62	796747
21.63	50818	21.63	482308	21.63	798116
21.64	49955.2	21.64	484065	21.64	798100
21.65	49475.5	21.65	484472	21.65	797467
21.66	50258.9	21.66	483476	21.66	796769
21.67	50453.6	21.67	482610	21.67	797128
21.68	50426.3	21.68	482762	21.68	797725
21.69	49150.1	21.69	483592	21.69	796883
21.7	50721.8	21.7	482223	21.7	796928
21.71	50917.2	21.71	483694	21.71	797001
21.72	50447.5	21.72	482958	21.72	796755
21.73	50091.3	21.73	482270	21.73	796839
21.74	50761.8	21.74	483194	21.74	796316
21.75	50493.7	21.75	483446	21.75	797290
21.76	51358.3	21.76	482355	21.76	797603
21.77	50631.3	21.77	481127	21.77	797959
21.78	49329.7	21.78	482757	21.78	796368
21.79	48924.9	21.79	481444	21.79	797599
21.8	50055.7	21.8	482065	21.8	796963
21.81	49771.5	21.81	483362	21.81	796674
21.82	50615.1	21.82	482785	21.82	796527
21.83	51017.7	21.83	482303	21.83	797401
21.84	51451.9	21.84	482231	21.84	797146
21.85	49310.1	21.85	483665	21.85	796975
21.86	50465.6	21.86	483045	21.86	797250
21.87	50737.4	21.87	482450	21.87	796536
21.88	50375.7	21.88	484432	21.88	797137
21.89	50776	21.89	484281	21.89	797477
21.9	50814.3	21.9	483617	21.9	798002
21.91	50922.4	21.91	483569	21.91	796824
21.92	51220.8	21.92	484769	21.92	797961
21.93	50691.3	21.93	484281	21.93	798662
21.94	51659	21.94	483949	21.94	798046
21.95	52066.2	21.95	485569	21.95	798744
21.96	53375.3	21.96	484893	21.96	798826
21.97	56629.6	21.97	485055	21.97	798835
[truncated: 4,803 more rows]

## Sheet: FIGURE 1(b)
FIGURE 1(b)
2 Theta (degree)	Intensity (a.u.)	2 Theta (degree)	Intensity (a.u.)
2	1.19337e+06	2	1.03475e+06
2.01	1.19332e+06	2.01	1.03568e+06
2.02	1.19283e+06	2.02	1.03527e+06
2.03	1.19251e+06	2.03	1.03536e+06
2.04	1.19286e+06	2.04	1.03515e+06
2.05	1.19276e+06	2.05	1.03584e+06
2.06	1.19305e+06	2.06	1.0358e+06
2.07	1.19282e+06	2.07	1.03475e+06
2.08	1.19284e+06	2.08	1.03483e+06
2.09	1.1927e+06	2.09	1.03511e+06
2.1	1.19316e+06	2.1	1.03549e+06
2.11	1.19305e+06	2.11	1.0352e+06
2.12	1.19263e+06	2.12	1.03535e+06
2.13	1.19257e+06	2.13	1.03536e+06
2.14	1.19283e+06	2.14	1.03518e+06
2.15	1.19237e+06	2.15	1.03569e+06
2.16	1.19333e+06	2.16	1.03549e+06
2.17	1.19306e+06	2.17	1.0355e+06
2.18	1.19254e+06	2.18	1.03523e+06
2.19	1.19371e+06	2.19	1.0357e+06
2.2	1.19343e+06	2.2	1.03523e+06
2.21	1.19298e+06	2.21	1.03543e+06
2.22	1.19296e+06	2.22	1.03559e+06
2.23	1.19301e+06	2.23	1.03588e+06
2.24	1.19302e+06	2.24	1.03546e+06
2.25	1.19344e+06	2.25	1.0359e+06
2.26	1.19325e+06	2.26	1.03526e+06
2.27	1.19378e+06	2.27	1.03545e+06
2.28	1.1935e+06	2.28	1.03578e+06
2.29	1.19395e+06	2.29	1.03611e+06
2.3	1.19329e+06	2.3	1.03618e+06
2.31	1.19352e+06	2.31	1.036e+06
2.32	1.19381e+06	2.32	1.03634e+06
2.33	1.19329e+06	2.33	1.03622e+06
2.34	1.19407e+06	2.34	1.03595e+06
2.35	1.1936e+06	2.35	1.03615e+06
2.36	1.19386e+06	2.36	1.03638e+06
2.37	1.19349e+06	2.37	1.03571e+06
2.38	1.19372e+06	2.38	1.03613e+06
2.39	1.19455e+06	2.39	1.03661e+06
2.4	1.19423e+06	2.4	1.03671e+06
2.41	1.19373e+06	2.41	1.0369e+06
2.42	1.19393e+06	2.42	1.03685e+06
2.43	1.19409e+06	2.43	1.03718e+06
2.44	1.19432e+06	2.44	1.03715e+06
2.45	1.19513e+06	2.45	1.03692e+06
2.46	1.19428e+06	2.46	1.03708e+06
2.47	1.19486e+06	2.47	1.03645e+06
2.48	1.19453e+06	2.48	1.03661e+06
2.49	1.19512e+06	2.49	1.03752e+06
2.5	1.19493e+06	2.5	1.0377e+06
2.51	1.1949e+06	2.51	1.03734e+06
2.52	1.19438e+06	2.52	1.03666e+06
2.53	1.19507e+06	2.53	1.03794e+06
2.54	1.19481e+06	2.54	1.03772e+06
2.55	1.19435e+06	2.55	1.0376e+06
2.56	1.19504e+06	2.56	1.03717e+06
2.57	1.19466e+06	2.57	1.03777e+06
2.58	1.19453e+06	2.58	1.03765e+06
2.59	1.19473e+06	2.59	1.03828e+06
2.6	1.19495e+06	2.6	1.03836e+06
2.61	1.19498e+06	2.61	1.03745e+06
2.62	1.19537e+06	2.62	1.03808e+06
2.63	1.1953e+06	2.63	1.03779e+06
2.64	1.19484e+06	2.64	1.03747e+06
2.65	1.19454e+06	2.65	1.03745e+06
2.66	1.19488e+06	2.66	1.03799e+06
2.67	1.19462e+06	2.67	1.03844e+06
2.68	1.19469e+06	2.68	1.03785e+06
2.69	1.19491e+06	2.69	1.03774e+06
2.7	1.19509e+06	2.7	1.03808e+06
2.71	1.19552e+06	2.71	1.0386e+06
2.72	1.19502e+06	2.72	1.03866e+06
2.73	1.19553e+06	2.73	1.03967e+06
2.74	1.19558e+06	2.74	1.03887e+06
2.75	1.19549e+06	2.75	1.03865e+06
2.76	1.19575e+06	2.76	1.03865e+06
2.77	1.19612e+06	2.77	1.03847e+06
2.78	1.19525e+06	2.78	1.03854e+06
2.79	1.19607e+06	2.79	1.03821e+06
2.8	1.19578e+06	2.8	1.03821e+06
2.81	1.19634e+06	2.81	1.03912e+06
2.82	1.19623e+06	2.82	1.03877e+06
2.83	1.19607e+06	2.83	1.03828e+06
2.84	1.19618e+06	2.84	1.03928e+06
2.85	1.19618e+06	2.85	1.03916e+06
2.86	1.19568e+06	2.86	1.0392e+06
2.87	1.19631e+06	2.87	1.03917e+06
2.88	1.19615e+06	2.88	1.03896e+06
2.89	1.19637e+06	2.89	1.03923e+06
2.9	1.19559e+06	2.9	1.0395e+06
2.91	1.19597e+06	2.91	1.04047e+06
2.92	1.19708e+06	2.92	1.03914e+06
2.93	1.19683e+06	2.93	1.03918e+06
2.94	1.19591e+06	2.94	1.03953e+06
2.95	1.19707e+06	2.95	1.03971e+06
2.96	1.19688e+06	2.96	1.04042e+06
2.97	1.19604e+06	2.97	1.03953e+06
2.98	1.19604e+06	2.98	1.03922e+06
2.99	1.19597e+06	2.99	1.03928e+06
3	1.19739e+06	3	1.03929e+06
3.01	1.19714e+06	3.01	1.03983e+06
3.02	1.19794e+06	3.02	1.03941e+06
3.03	1.19692e+06	3.03	1.03991e+06
3.04	1.19714e+06	3.04	1.03967e+06
3.05	1.19746e+06	3.05	1.03946e+06
3.06	1.19794e+06	3.06	1.04032e+06
3.07	1.19739e+06	3.07	1.0409e+06
3.08	1.19733e+06	3.08	1.04032e+06
3.09	1.19792e+06	3.09	1.04061e+06
3.1	1.19874e+06	3.1	1.04129e+06
3.11	1.19895e+06	3.11	1.04105e+06
3.12	1.19762e+06	3.12	1.04119e+06
3.13	1.19856e+06	3.13	1.04065e+06
3.14	1.19763e+06	3.14	1.04018e+06
3.15	1.19852e+06	3.15	1.04054e+06
3.16	1.19894e+06	3.16	1.04079e+06
3.17	1.19874e+06	3.17	1.04046e+06
3.18	1.19904e+06	3.18	1.04083e+06
3.19	1.19993e+06	3.19	1.04077e+06
3.2	1.19933e+06	3.2	1.0405e+06
3.21	1.19893e+06	3.21	1.04118e+06
3.22	1.19967e+06	3.22	1.04152e+06
3.23	1.19989e+06	3.23	1.0417e+06
3.24	1.2002e+06	3.24	1.04131e+06
3.25	1.20046e+06	3.25	1.04147e+06
3.26	1.19933e+06	3.26	1.04132e+06
3.27	1.19981e+06	3.27	1.04126e+06
3.28	1.1998e+06	3.28	1.04116e+06
3.29	1.19974e+06	3.29	1.04174e+06
3.3	1.19982e+06	3.3	1.04157e+06
3.31	1.19992e+06	3.31	1.04153e+06
3.32	1.19962e+06	3.32	1.04167e+06
3.33	1.2003e+06	3.33	1.042e+06
3.34	1.20056e+06	3.34	1.04125e+06
3.35	1.20153e+06	3.35	1.04156e+06
3.36	1.20054e+06	3.36	1.04189e+06
3.37	1.20011e+06	3.37	1.04182e+06
3.38	1.20019e+06	3.38	1.04222e+06
3.39	1.2e+06	3.39	1.04263e+06
3.4	1.20012e+06	3.4	1.04248e+06
3.41	1.19972e+06	3.41	1.04192e+06
3.42	1.19967e+06	3.42	1.04199e+06
3.43	1.19958e+06	3.43	1.04205e+06
3.44	1.2003e+06	3.44	1.04243e+06
3.45	1.20033e+06	3.45	1.0422e+06
3.46	1.20047e+06	3.46	1.0426e+06
3.47	1.20046e+06	3.47	1.04293e+06
3.48	1.19994e+06	3.48	1.04161e+06
3.49	1.20075e+06	3.49	1.04198e+06
3.5	1.20081e+06	3.5	1.04159e+06
3.51	1.20064e+06	3.51	1.04201e+06
3.52	1.20032e+06	3.52	1.04189e+06
3.53	1.20103e+06	3.53	1.04245e+06
3.54	1.20086e+06	3.54	1.04202e+06
3.55	1.20043e+06	3.55	1.04257e+06
3.56	1.20099e+06	3.56	1.04229e+06
3.57	1.2004e+06	3.57	1.0427e+06
3.58	1.20116e+06	3.58	1.04163e+06
3.59	1.20009e+06	3.59	1.04162e+06
3.6	1.20095e+06	3.6	1.04289e+06
3.61	1.20058e+06	3.61	1.04307e+06
3.62	1.20106e+06	3.62	1.04183e+06
3.63	1.19989e+06	3.63	1.0426e+06
3.64	1.19998e+06	3.64	1.04268e+06
3.65	1.20124e+06	3.65	1.04254e+06
3.66	1.19993e+06	3.66	1.04292e+06
3.67	1.20184e+06	3.67	1.04288e+06
3.68	1.20152e+06	3.68	1.04218e+06
3.69	1.20059e+06	3.69	1.04317e+06
3.7	1.20129e+06	3.7	1.04221e+06
3.71	1.20113e+06	3.71	1.04253e+06
3.72	1.20058e+06	3.72	1.04233e+06
3.73	1.20147e+06	3.73	1.04276e+06
3.74	1.20071e+06	3.74	1.04211e+06
3.75	1.2014e+06	3.75	1.043e+06
3.76	1.20025e+06	3.76	1.04244e+06
3.77	1.20077e+06	3.77	1.04269e+06
3.78	1.20122e+06	3.78	1.04298e+06
3.79	1.2014e+06	3.79	1.04354e+06
3.8	1.20044e+06	3.8	1.04238e+06
3.81	1.20092e+06	3.81	1.04221e+06
3.82	1.20139e+06	3.82	1.04325e+06
3.83	1.20116e+06	3.83	1.04258e+06
3.84	1.20073e+06	3.84	1.04183e+06
3.85	1.20125e+06	3.85	1.04178e+06
3.86	1.20083e+06	3.86	1.04247e+06
3.87	1.20143e+06	3.87	1.0436e+06
3.88	1.20085e+06	3.88	1.0429e+06
3.89	1.20087e+06	3.89	1.04326e+06
3.9	1.20065e+06	3.9	1.04395e+06
3.91	1.20092e+06	3.91	1.04321e+06
3.92	1.20076e+06	3.92	1.04316e+06
3.93	1.20127e+06	3.93	1.04378e+06
3.94	1.20035e+06	3.94	1.0435e+06
3.95	1.20139e+06	3.95	1.04354e+06
3.96	1.20096e+06	3.96	1.04292e+06
3.97	1.20021e+06	3.97	1.043e+06
3.98	1.20152e+06	3.98	1.0427e+06
3.99	1.20166e+06	3.99	1.04311e+06
4	1.2019e+06	4	1.04221e+06
4.01	1.20106e+06	4.01	1.04217e+06
4.02	1.20011e+06	4.02	1.04245e+06
4.03	1.20116e+06	4.03	1.04293e+06
4.04	1.2013e+06	4.04	1.04409e+06
4.05	1.20142e+06	4.05	1.0438e+06
4.06	1.20143e+06	4.06	1.04258e+06
4.07	1.20123e+06	4.07	1.04295e+06
4.08	1.20112e+06	4.08	1.04305e+06
4.09	1.20088e+06	4.09	1.04244e+06
4.1	1.19981e+06	4.1	1.04285e+06
4.11	1.20148e+06	4.11	1.04333e+06
4.12	1.20069e+06	4.12	1.04323e+06
4.13	1.20111e+06	4.13	1.04288e+06
4.14	1.20083e+06	4.14	1.04336e+06
4.15	1.20103e+06	4.15	1.04311e+06
4.16	1.20099e+06	4.16	1.04308e+06
4.17	1.20141e+06	4.17	1.04337e+06
4.18	1.20136e+06	4.18	1.04326e+06
4.19	1.20217e+06	4.19	1.04305e+06
4.2	1.20122e+06	4.2	1.04399e+06
4.21	1.20239e+06	4.21	1.04338e+06
4.22	1.20161e+06	4.22	1.04306e+06
4.23	1.20068e+06	4.23	1.04306e+06
4.24	1.202e+06	4.24	1.0437e+06
4.25	1.20096e+06	4.25	1.04415e+06
4.26	1.20055e+06	4.26	1.04428e+06
4.27	1.20123e+06	4.27	1.04385e+06
4.28	1.20178e+06	4.28	1.04329e+06
4.29	1.20114e+06	4.29	1.04381e+06
4.3	1.202e+06	4.3	1.04337e+06
4.31	1.20165e+06	4.31	1.0433e+06
4.32	1.20023e+06	4.32	1.04385e+06
4.33	1.20153e+06	4.33	1.04388e+06
4.34	1.20056e+06	4.34	1.04357e+06
4.35	1.20154e+06	4.35	1.04409e+06
4.36	1.2008e+06	4.36	1.04362e+06
4.37	1.20092e+06	4.37	1.04376e+06
4.38	1.20183e+06	4.38	1.04268e+06
4.39	1.20171e+06	4.39	1.04323e+06
4.4	1.20201e+06	4.4	1.04329e+06
4.41	1.20226e+06	4.41	1.04289e+06
4.42	1.20106e+06	4.42	1.04329e+06
4.43	1.20179e+06	4.43	1.04347e+06
4.44	1.20191e+06	4.44	1.04344e+06
4.45	1.20159e+06	4.45	1.04355e+06
4.46	1.20091e+06	4.46	1.04421e+06
4.47	1.20133e+06	4.47	1.04395e+06
4.48	1.2021e+06	4.48	1.04331e+06
4.49	1.20088e+06	4.49	1.04332e+06
4.5	1.20211e+06	4.5	1.04423e+06
4.51	1.20151e+06	4.51	1.04383e+06
4.52	1.20182e+06	4.52	1.04317e+06
4.53	1.20194e+06	4.53	1.04431e+06
4.54	1.20168e+06	4.54	1.04446e+06
4.55	1.20137e+06	4.55	1.04352e+06
4.56	1.2008e+06	4.56	1.04391e+06
4.57	1.20163e+06	4.57	1.04355e+06
4.58	1.20113e+06	4.58	1.04368e+06
4.59	1.20269e+06	4.59	1.04393e+06
4.6	1.20199e+06	4.6	1.04365e+06
4.61	1.20141e+06	4.61	1.04322e+06
4.62	1.20149e+06	4.62	1.0443e+06
4.63	1.20196e+06	4.63	1.04458e+06
4.64	1.20226e+06	4.64	1.04471e+06
4.65	1.2019e+06	4.65	1.04402e+06
4.66	1.20161e+06	4.66	1.04341e+06
4.67	1.20169e+06	4.67	1.04398e+06
4.68	1.20172e+06	4.68	1.04439e+06
4.69	1.20154e+06	4.69	1.04347e+06
4.7	1.20119e+06	4.7	1.04469e+06
4.71	1.20169e+06	4.71	1.04347e+06
4.72	1.20103e+06	4.72	1.04387e+06
4.73	1.20269e+06	4.73	1.04345e+06
4.74	1.20239e+06	4.74	1.04454e+06
4.75	1.2018e+06	4.75	1.04409e+06
4.76	1.20127e+06	4.76	1.04387e+06
4.77	1.20157e+06	4.77	1.0431e+06
4.78	1.20243e+06	4.78	1.04392e+06
4.79	1.20201e+06	4.79	1.04413e+06
4.8	1.20208e+06	4.8	1.04448e+06
4.81	1.201e+06	4.81	1.04433e+06
4.82	1.20193e+06	4.82	1.04347e+06
4.83	1.20188e+06	4.83	1.04411e+06
4.84	1.20214e+06	4.84	1.04439e+06
4.85	1.20189e+06	4.85	1.0443e+06
4.86	1.20278e+06	4.86	1.04452e+06
4.87	1.20249e+06	4.87	1.04444e+06
4.88	1.20221e+06	4.88	1.04539e+06
4.89	1.20282e+06	4.89	1.04484e+06
4.9	1.20187e+06	4.9	1.04375e+06
4.91	1.20175e+06	4.91	1.04453e+06
4.92	1.20277e+06	4.92	1.04503e+06
4.93	1.20241e+06	4.93	1.04398e+06
4.94	1.2022e+06	4.94	1.04427e+06
4.95	1.20248e+06	4.95	1.04438e+06
4.96	1.2021e+06	4.96	1.04405e+06
4.97	1.20151e+06	4.97	1.04418e+06
4.98	1.20137e+06	4.98	1.04456e+06
4.99	1.20216e+06	4.99	1.04537e+06
5	1.20236e+06	5	1.04431e+06
5.01	1.20227e+06	5.01	1.04507e+06
5.02	1.20232e+06	5.02	1.04509e+06
5.03	1.20154e+06	5.03	1.04444e+06
5.04	1.20232e+06	5.04	1.04474e+06
5.05	1.20312e+06	5.05	1.04467e+06
5.06	1.2027e+06	5.06	1.04441e+06
5.07	1.20205e+06	5.07	1.04463e+06
5.08	1.20345e+06	5.08	1.04527e+06
5.09	1.20298e+06	5.09	1.04463e+06
5.1	1.20313e+06	5.1	1.04532e+06
5.11	1.20229e+06	5.11	1.04478e+06
5.12	1.2027e+06	5.12	1.04453e+06
5.13	1.20258e+06	5.13	1.04475e+06
5.14	1.20256e+06	5.14	1.04465e+06
5.15	1.20271e+06	5.15	1.04466e+06
5.16	1.20258e+06	5.16	1.04458e+06
5.17	1.20262e+06	5.17	1.04494e+06
5.18	1.20156e+06	5.18	1.04507e+06
5.19	1.20216e+06	5.19	1.04517e+06
5.2	1.20235e+06	5.2	1.04467e+06
5.21	1.20258e+06	5.21	1.04533e+06
5.22	1.20268e+06	5.22	1.04451e+06
5.23	1.20271e+06	5.23	1.04434e+06
5.24	1.20347e+06	5.24	1.04465e+06
5.25	1.20316e+06	5.25	1.04583e+06
5.26	1.20315e+06	5.26	1.04486e+06
5.27	1.20269e+06	5.27	1.04531e+06
5.28	1.20222e+06	5.28	1.04459e+06
5.29	1.20235e+06	5.29	1.04416e+06
5.3	1.20255e+06	5.3	1.04408e+06
5.31	1.20379e+06	5.31	1.04566e+06
5.32	1.20322e+06	5.32	1.04497e+06
5.33	1.20289e+06	5.33	1.04547e+06
5.34	1.20258e+06	5.34	1.045e+06
5.35	1.20251e+06	5.35	1.0451e+06
5.36	1.20311e+06	5.36	1.04589e+06
5.37	1.20221e+06	5.37	1.04538e+06
5.38	1.20257e+06	5.38	1.04519e+06
5.39	1.2036e+06	5.39	1.04595e+06
5.4	1.20259e+06	5.4	1.04515e+06
5.41	1.20271e+06	5.41	1.04508e+06
5.42	1.20219e+06	5.42	1.04566e+06
5.43	1.20315e+06	5.43	1.04511e+06
5.44	1.20341e+06	5.44	1.04602e+06
5.45	1.20362e+06	5.45	1.0456e+06
5.46	1.20382e+06	5.46	1.04534e+06
5.47	1.20368e+06	5.47	1.04577e+06
5.48	1.2024e+06	5.48	1.04543e+06
5.49	1.20311e+06	5.49	1.045e+06
5.5	1.20268e+06	5.5	1.04531e+06
5.51	1.20353e+06	5.51	1.04532e+06
5.52	1.20335e+06	5.52	1.04473e+06
5.53	1.20362e+06	5.53	1.04589e+06
5.54	1.2031e+06	5.54	1.04633e+06
5.55	1.20379e+06	5.55	1.04565e+06
5.56	1.20301e+06	5.56	1.04501e+06
5.57	1.2036e+06	5.57	1.04448e+06
5.58	1.20263e+06	5.58	1.04521e+06
5.59	1.20292e+06	5.59	1.0459e+06
5.6	1.20377e+06	5.6	1.04459e+06
5.61	1.20297e+06	5.61	1.04524e+06
5.62	1.20354e+06	5.62	1.04531e+06
5.63	1.20211e+06	5.63	1.04544e+06
5.64	1.20379e+06	5.64	1.04542e+06
5.65	1.20356e+06	5.65	1.04643e+06
5.66	1.2033e+06	5.66	1.04595e+06
5.67	1.20318e+06	5.67	1.04548e+06
5.68	1.20302e+06	5.68	1.04607e+06
5.69	1.20339e+06	5.69	1.04643e+06
5.7	1.20316e+06	5.7	1.04566e+06
5.71	1.20408e+06	5.71	1.04548e+06
5.72	1.20278e+06	5.72	1.04652e+06
5.73	1.20375e+06	5.73	1.04647e+06
5.74	1.20265e+06	5.74	1.04603e+06
5.75	1.20204e+06	5.75	1.04603e+06
5.76	1.20271e+06	5.76	1.04629e+06
5.77	1.20321e+06	5.77	1.04509e+06
5.78	1.20283e+06	5.78	1.04576e+06
5.79	1.20345e+06	5.79	1.04576e+06
5.8	1.2038e+06	5.8	1.04651e+06
5.81	1.20317e+06	5.81	1.04657e+06
5.82	1.20333e+06	5.82	1.04602e+06
5.83	1.20278e+06	5.83	1.04666e+06
5.84	1.20347e+06	5.84	1.04611e+06
5.85	1.20445e+06	5.85	1.04635e+06
5.86	1.2045e+06	5.86	1.0463e+06
5.87	1.20366e+06	5.87	1.04579e+06
5.88	1.20451e+06	5.88	1.04737e+06
5.89	1.20355e+06	5.89	1.04587e+06
5.9	1.20346e+06	5.9	1.04676e+06
5.91	1.20345e+06	5.91	1.04628e+06
5.92	1.20364e+06	5.92	1.04615e+06
5.93	1.20313e+06	5.93	1.04651e+06
5.94	1.2035e+06	5.94	1.04564e+06
5.95	1.20397e+06	5.95	1.0466e+06
5.96	1.20424e+06	5.96	1.04569e+06
5.97	1.20356e+06	5.97	1.04617e+06
5.98	1.2047e+06	5.98	1.04675e+06
5.99	1.20477e+06	5.99	1.04771e+06
6	1.20398e+06	6	1.04669e+06
6.01	1.20315e+06	6.01	1.04688e+06
6.02	1.20322e+06	6.02	1.04651e+06
6.03	1.20346e+06	6.03	1.04709e+06
6.04	1.20403e+06	6.04	1.04661e+06
6.05	1.20399e+06	6.05	1.04633e+06
6.06	1.20406e+06	6.06	1.04624e+06
6.07	1.20394e+06	6.07	1.04655e+06
6.08	1.20431e+06	6.08	1.0459e+06
6.09	1.20372e+06	6.09	1.04632e+06
6.1	1.20378e+06	6.1	1.04681e+06
6.11	1.20464e+06	6.11	1.04731e+06
6.12	1.20332e+06	6.12	1.04613e+06
6.13	1.20308e+06	6.13	1.04583e+06
6.14	1.20401e+06	6.14	1.04611e+06
6.15	1.20427e+06	6.15	1.04722e+06
6.16	1.20389e+06	6.16	1.04711e+06
6.17	1.20438e+06	6.17	1.04661e+06
6.18	1.20385e+06	6.18	1.04578e+06
6.19	1.20522e+06	6.19	1.04742e+06
6.2	1.20387e+06	6.2	1.04742e+06
6.21	1.20362e+06	6.21	1.04617e+06
6.22	1.20366e+06	6.22	1.04619e+06
6.23	1.20431e+06	6.23	1.04646e+06
6.24	1.20435e+06	6.24	1.04761e+06
6.25	1.20346e+06	6.25	1.04761e+06
6.26	1.20372e+06	6.26	1.0473e+06
6.27	1.2042e+06	6.27	1.04719e+06
6.28	1.20363e+06	6.28	1.04673e+06
6.29	1.20422e+06	6.29	1.04707e+06
6.3	1.2045e+06	6.3	1.0467e+06
6.31	1.20371e+06	6.31	1.04702e+06
6.32	1.20428e+06	6.32	1.04657e+06
6.33	1.20502e+06	6.33	1.04761e+06
6.34	1.20461e+06	6.34	1.04824e+06
6.35	1.2044e+06	6.35	1.04744e+06
6.36	1.20502e+06	6.36	1.04584e+06
6.37	1.20484e+06	6.37	1.04697e+06
6.38	1.20517e+06	6.38	1.04735e+06
6.39	1.20476e+06	6.39	1.04785e+06
6.4	1.20509e+06	6.4	1.04781e+06
6.41	1.20415e+06	6.41	1.04828e+06
6.42	1.20422e+06	6.42	1.04699e+06
6.43	1.20427e+06	6.43	1.04799e+06
6.44	1.20414e+06	6.44	1.04768e+06
6.45	1.20499e+06	6.45	1.04822e+06
6.46	1.20457e+06	6.46	1.04714e+06
6.47	1.20504e+06	6.47	1.04826e+06
6.48	1.20535e+06	6.48	1.04779e+06
6.49	1.20481e+06	6.49	1.0479e+06
6.5	1.20462e+06	6.5	1.04737e+06
6.51	1.2044e+06	6.51	1.04757e+06
6.52	1.20497e+06	6.52	1.04876e+06
6.53	1.20509e+06	6.53	1.04827e+06
6.54	1.20505e+06	6.54	1.04726e+06
6.55	1.20504e+06	6.55	1.04824e+06
6.56	1.20478e+06	6.56	1.04804e+06
6.57	1.20504e+06	6.57	1.04863e+06
6.58	1.20507e+06	6.58	1.04781e+06
6.59	1.20417e+06	6.59	1.04743e+06
6.6	1.20492e+06	6.6	1.04795e+06
6.61	1.20461e+06	6.61	1.04818e+06
6.62	1.20521e+06	6.62	1.0477e+06
6.63	1.20552e+06	6.63	1.04778e+06
6.64	1.20458e+06	6.64	1.04827e+06
6.65	1.20485e+06	6.65	1.04788e+06
6.66	1.20445e+06	6.66	1.04722e+06
6.67	1.20514e+06	6.67	1.04919e+06
6.68	1.20458e+06	6.68	1.04782e+06
6.69	1.20544e+06	6.69	1.04768e+06
6.7	1.20535e+06	6.7	1.04754e+06
6.71	1.20492e+06	6.71	1.04788e+06
6.72	1.20433e+06	6.72	1.04775e+06
6.73	1.20636e+06	6.73	1.04825e+06
6.74	1.20565e+06	6.74	1.04937e+06
6.75	1.20363e+06	6.75	1.04761e+06
6.76	1.20503e+06	6.76	1.04808e+06
6.77	1.20429e+06	6.77	1.04761e+06
6.78	1.20496e+06	6.78	1.04832e+06
6.79	1.20509e+06	6.79	1.04799e+06
6.8	1.20612e+06	6.8	1.04798e+06
6.81	1.20547e+06	6.81	1.04776e+06
6.82	1.20491e+06	6.82	1.049e+06
6.83	1.20469e+06	6.83	1.04867e+06
6.84	1.20503e+06	6.84	1.04722e+06
6.85	1.2051e+06	6.85	1.04864e+06
6.86	1.20516e+06	6.86	1.04823e+06
6.87	1.2058e+06	6.87	1.04935e+06
6.88	1.20544e+06	6.88	1.04773e+06
6.89	1.20533e+06	6.89	1.04823e+06
6.9	1.20488e+06	6.9	1.04845e+06
6.91	1.20566e+06	6.91	1.04806e+06
6.92	1.20593e+06	6.92	1.04836e+06
6.93	1.20571e+06	6.93	1.04864e+06
6.94	1.20604e+06	6.94	1.04827e+06
6.95	1.20525e+06	6.95	1.0475e+06
6.96	1.2056e+06	6.96	1.04795e+06
6.97	1.20576e+06	6.97	1.04875e+06
6.98	1.2058e+06	6.98	1.04876e+06
6.99	1.20597e+06	6.99	1.0482e+06
7	1.20561e+06	7	1.04883e+06
7.01	1.20587e+06	7.01	1.04825e+06
7.02	1.20602e+06	7.02	1.04854e+06
7.03	1.20598e+06	7.03	1.04841e+06
7.04	1.20569e+06	7.04	1.04771e+06
7.05	1.20551e+06	7.05	1.04852e+06
7.06	1.20679e+06	7.06	1.04848e+06
7.07	1.20485e+06	7.07	1.04911e+06
7.08	1.20572e+06	7.08	1.04903e+06
7.09	1.2059e+06	7.09	1.04884e+06
7.1	1.20558e+06	7.1	1.04793e+06
7.11	1.20551e+06	7.11	1.04904e+06
7.12	1.20584e+06	7.12	1.04917e+06
7.13	1.20602e+06	7.13	1.04815e+06
7.14	1.20575e+06	7.14	1.04862e+06
7.15	1.20631e+06	7.15	1.04874e+06
7.16	1.20634e+06	7.16	1.04922e+06
7.17	1.20578e+06	7.17	1.05016e+06
7.18	1.20724e+06	7.18	1.04958e+06
7.19	1.20568e+06	7.19	1.04913e+06
7.2	1.20594e+06	7.2	1.04818e+06
7.21	1.20626e+06	7.21	1.04934e+06
7.22	1.20581e+06	7.22	1.04974e+06
7.23	1.20672e+06	7.23	1.04897e+06
7.24	1.20708e+06	7.24	1.04933e+06
7.25	1.20553e+06	7.25	1.0498e+06
7.26	1.20535e+06	7.26	1.04994e+06
7.27	1.20698e+06	7.27	1.04991e+06
7.28	1.20694e+06	7.28	1.05058e+06
7.29	1.20704e+06	7.29	1.05047e+06
7.3	1.20697e+06	7.3	1.05082e+06
7.31	1.20775e+06	7.31	1.05057e+06
7.32	1.20771e+06	7.32	1.05011e+06
7.33	1.20742e+06	7.33	1.05032e+06
7.34	1.20674e+06	7.34	1.05033e+06
7.35	1.20839e+06	7.35	1.05214e+06
7.36	1.2094e+06	7.36	1.05139e+06
7.37	1.21004e+06	7.37	1.05169e+06
7.38	1.2103e+06	7.38	1.05321e+06
7.39	1.20956e+06	7.39	1.05478e+06
7.4	1.21099e+06	7.4	1.0546e+06
7.41	1.21101e+06	7.41	1.0552e+06
7.42	1.20954e+06	7.42	1.05566e+06
7.43	1.2104e+06	7.43	1.05765e+06
7.44	1.20886e+06	7.44	1.05849e+06
7.45	1.20833e+06	7.45	1.06025e+06
7.46	1.20743e+06	7.46	1.05861e+06
7.47	1.20778e+06	7.47	1.05778e+06
7.48	1.20708e+06	7.48	1.0564e+06
7.49	1.20698e+06	7.49	1.05475e+06
7.5	1.20649e+06	7.5	1.05157e+06
7.51	1.20615e+06	7.51	1.05084e+06
7.52	1.20606e+06	7.52	1.05096e+06
7.53	1.20762e+06	7.53	1.05135e+06
7.54	1.20678e+06	7.54	1.05044e+06
7.55	1.20591e+06	7.55	1.05037e+06
7.56	1.20538e+06	7.56	1.04955e+06
7.57	1.20754e+06	7.57	1.04985e+06
7.58	1.20709e+06	7.58	1.04942e+06
7.59	1.20673e+06	7.59	1.05161e+06
7.6	1.20766e+06	7.6	1.04968e+06
7.61	1.20708e+06	7.61	1.04968e+06
7.62	1.20728e+06	7.62	1.04924e+06
7.63	1.20678e+06	7.63	1.05065e+06
7.64	1.20749e+06	7.64	1.0505e+06
7.65	1.20681e+06	7.65	1.04995e+06
7.66	1.20704e+06	7.66	1.04975e+06
7.67	1.20706e+06	7.67	1.05076e+06
7.68	1.20721e+06	7.68	1.05058e+06
7.69	1.2082e+06	7.69	1.05121e+06
7.7	1.20692e+06	7.7	1.05037e+06
7.71	1.207e+06	7.71	1.05031e+06
7.72	1.20671e+06	7.72	1.04966e+06
7.73	1.20718e+06	7.73	1.05017e+06
7.74	1.20734e+06	7.74	1.0506e+06
7.75	1.20785e+06	7.75	1.05044e+06
7.76	1.20789e+06	7.76	1.05149e+06
7.77	1.2083e+06	7.77	1.05048e+06
7.78	1.20699e+06	7.78	1.05171e+06
7.79	1.20804e+06	7.79	1.05052e+06
7.8	1.20932e+06	7.8	1.05084e+06
7.81	1.2096e+06	7.81	1.05208e+06
7.82	1.20938e+06	7.82	1.05159e+06
7.83	1.21062e+06	7.83	1.05242e+06
7.84	1.21176e+06	7.84	1.05236e+06
7.85	1.21229e+06	7.85	1.05326e+06
7.86	1.21163e+06	7.86	1.05272e+06
7.87	1.21194e+06	7.87	1.05309e+06
7.88	1.2112e+06	7.88	1.05469e+06
7.89	1.21026e+06	7.89	1.05522e+06
7.9	1.20942e+06	7.9	1.05438e+06
7.91	1.20882e+06	7.91	1.05463e+06
7.92	1.20858e+06	7.92	1.05478e+06
7.93	1.20791e+06	7.93	1.05301e+06
7.94	1.20868e+06	7.94	1.05191e+06
7.95	1.20749e+06	7.95	1.05127e+06
7.96	1.20761e+06	7.96	1.05072e+06
7.97	1.20605e+06	7.97	1.05137e+06
7.98	1.20779e+06	7.98	1.05036e+06
7.99	1.207e+06	7.99	1.04968e+06
8	1.20716e+06	8	1.05117e+06
8.01	1.20807e+06	8.01	1.05087e+06
8.02	1.20723e+06	8.02	1.05069e+06
8.03	1.20668e+06	8.03	1.05161e+06
8.04	1.20652e+06	8.04	1.05184e+06
8.05	1.20697e+06	8.05	1.05176e+06
8.06	1.20726e+06	8.06	1.05097e+06
8.07	1.20702e+06	8.07	1.05179e+06
8.08	1.2079e+06	8.08	1.05119e+06
8.09	1.20694e+06	8.09	1.05101e+06
8.1	1.20756e+06	8.1	1.05081e+06
8.11	1.20738e+06	8.11	1.0511e+06
8.12	1.20739e+06	8.12	1.05154e+06
8.13	1.20729e+06	8.13	1.05255e+06
8.14	1.20727e+06	8.14	1.05182e+06
8.15	1.20729e+06	8.15	1.05099e+06
8.16	1.20754e+06	8.16	1.05172e+06
8.17	1.20777e+06	8.17	1.05187e+06
8.18	1.20825e+06	8.18	1.05159e+06
8.19	1.20809e+06	8.19	1.05223e+06
8.2	1.20774e+06	8.2	1.05204e+06
8.21	1.2081e+06	8.21	1.05126e+06
8.22	1.20772e+06	8.22	1.0519e+06
8.23	1.20789e+06	8.23	1.05207e+06
8.24	1.20802e+06	8.24	1.05241e+06
8.25	1.20848e+06	8.25	1.05217e+06
8.26	1.20794e+06	8.26	1.0523e+06
8.27	1.20831e+06	8.27	1.05153e+06
8.28	1.20833e+06	8.28	1.05044e+06
8.29	1.20806e+06	8.29	1.05166e+06
8.3	1.20701e+06	8.3	1.05121e+06
8.31	1.2085e+06	8.31	1.05108e+06
8.32	1.20724e+06	8.32	1.05175e+06
8.33	1.20718e+06	8.33	1.05214e+06
8.34	1.20765e+06	8.34	1.0516e+06
8.35	1.20883e+06	8.35	1.05184e+06
8.36	1.20812e+06	8.36	1.05123e+06
8.37	1.20786e+06	8.37	1.05166e+06
8.38	1.20703e+06	8.38	1.05051e+06
8.39	1.20695e+06	8.39	1.05179e+06
8.4	1.20786e+06	8.4	1.05153e+06
8.41	1.20828e+06	8.41	1.05202e+06
8.42	1.20817e+06	8.42	1.05209e+06
8.43	1.20811e+06	8.43	1.05213e+06
8.44	1.20823e+06	8.44	1.05168e+06
8.45	1.20738e+06	8.45	1.05197e+06
8.46	1.20821e+06	8.46	1.05258e+06
8.47	1.2086e+06	8.47	1.05202e+06
8.48	1.20872e+06	8.48	1.05123e+06
8.49	1.20781e+06	8.49	1.05249e+06
8.5	1.20762e+06	8.5	1.05082e+06
8.51	1.20834e+06	8.51	1.0523e+06
8.52	1.20865e+06	8.52	1.05226e+06
8.53	1.20785e+06	8.53	1.05137e+06
8.54	1.20923e+06	8.54	1.05271e+06
8.55	1.2092e+06	8.55	1.05185e+06
8.56	1.2079e+06	8.56	1.05189e+06
8.57	1.20808e+06	8.57	1.05171e+06
8.58	1.2085e+06	8.58	1.05198e+06
8.59	1.20887e+06	8.59	1.0531e+06
8.6	1.20788e+06	8.6	1.05198e+06
8.61	1.20825e+06	8.61	1.05215e+06
8.62	1.20837e+06	8.62	1.05182e+06
8.63	1.20869e+06	8.63	1.05248e+06
8.64	1.20809e+06	8.64	1.05305e+06
8.65	1.20806e+06	8.65	1.05258e+06
8.66	1.20918e+06	8.66	1.05235e+06
8.67	1.20946e+06	8.67	1.05321e+06
8.68	1.2088e+06	8.68	1.05268e+06
8.69	1.20879e+06	8.69	1.05297e+06
8.7	1.20846e+06	8.7	1.05217e+06
8.71	1.20879e+06	8.71	1.05257e+06
8.72	1.20849e+06	8.72	1.05349e+06
8.73	1.2082e+06	8.73	1.05262e+06
8.74	1.20858e+06	8.74	1.05237e+06
8.75	1.20773e+06	8.75	1.05253e+06
8.76	1.20862e+06	8.76	1.05129e+06
8.77	1.20895e+06	8.77	1.05267e+06
8.78	1.20833e+06	8.78	1.05231e+06
8.79	1.20787e+06	8.79	1.05171e+06
8.8	1.20855e+06	8.8	1.05273e+06
8.81	1.20838e+06	8.81	1.05232e+06
8.82	1.20802e+06	8.82	1.05245e+06
8.83	1.20877e+06	8.83	1.05287e+06
8.84	1.2086e+06	8.84	1.05339e+06
8.85	1.20846e+06	8.85	1.05244e+06
8.86	1.20911e+06	8.86	1.0533e+06
8.87	1.20927e+06	8.87	1.05297e+06
8.88	1.20997e+06	8.88	1.05329e+06
8.89	1.20937e+06	8.89	1.05242e+06
8.9	1.20935e+06	8.9	1.05302e+06
8.91	1.20978e+06	8.91	1.05277e+06
8.92	1.2096e+06	8.92	1.05286e+06
8.93	1.21029e+06	8.93	1.05304e+06
8.94	1.21011e+06	8.94	1.05311e+06
8.95	1.21051e+06	8.95	1.05284e+06
8.96	1.21e+06	8.96	1.05389e+06
8.97	1.21116e+06	8.97	1.05421e+06
8.98	1.21051e+06	8.98	1.05459e+06
8.99	1.21135e+06	8.99	1.05388e+06
9	1.21215e+06	9	1.05388e+06
9.01	1.21257e+06	9.01	1.05565e+06
9.02	1.21231e+06	9.02	1.05477e+06
9.03	1.21263e+06	9.03	1.05464e+06
9.04	1.21363e+06	9.04	1.05577e+06
9.05	1.21353e+06	9.05	1.05632e+06
9.06	1.21157e+06	9.06	1.05596e+06
9.07	1.21151e+06	9.07	1.05666e+06
9.08	1.21116e+06	9.08	1.05596e+06
9.09	1.21007e+06	9.09	1.05483e+06
9.1	1.20926e+06	9.1	1.05441e+06
9.11	1.20917e+06	9.11	1.05347e+06
9.12	1.20966e+06	9.12	1.05549e+06
9.13	1.21117e+06	9.13	1.05402e+06
9.14	1.20957e+06	9.14	1.05296e+06
9.15	1.20925e+06	9.15	1.05383e+06
9.16	1.20989e+06	9.16	1.0535e+06
9.17	1.20956e+06	9.17	1.05321e+06
9.18	1.20918e+06	9.18	1.05461e+06
9.19	1.2096e+06	9.19	1.05508e+06
9.2	1.20981e+06	9.2	1.05416e+06
9.21	1.20991e+06	9.21	1.05393e+06
9.22	1.20975e+06	9.22	1.05309e+06
9.23	1.20922e+06	9.23	1.05353e+06
9.24	1.21006e+06	9.24	1.05423e+06
9.25	1.2094e+06	9.25	1.0542e+06
9.26	1.20958e+06	9.26	1.05323e+06
9.27	1.20899e+06	9.27	1.05303e+06
9.28	1.20946e+06	9.28	1.05428e+06
9.29	1.2095e+06	9.29	1.05393e+06
9.3	1.20982e+06	9.3	1.05515e+06
9.31	1.20928e+06	9.31	1.05471e+06
9.32	1.20889e+06	9.32	1.05406e+06
9.33	1.20965e+06	9.33	1.05509e+06
9.34	1.20963e+06	9.34	1.0537e+06
9.35	1.21033e+06	9.35	1.05358e+06
9.36	1.20995e+06	9.36	1.05431e+06
9.37	1.21005e+06	9.37	1.05302e+06
9.38	1.2105e+06	9.38	1.05457e+06
9.39	1.20939e+06	9.39	1.05443e+06
9.4	1.209e+06	9.4	1.05367e+06
9.41	1.20929e+06	9.41	1.05344e+06
9.42	1.21008e+06	9.42	1.0538e+06
9.43	1.21057e+06	9.43	1.05426e+06
9.44	1.21021e+06	9.44	1.05363e+06
9.45	1.21e+06	9.45	1.05409e+06
9.46	1.20959e+06	9.46	1.05483e+06
9.47	1.2095e+06	9.47	1.05367e+06
9.48	1.21028e+06	9.48	1.05426e+06
9.49	1.20905e+06	9.49	1.05413e+06
9.5	1.20926e+06	9.5	1.05436e+06
9.51	1.2101e+06	9.51	1.05386e+06
9.52	1.21006e+06	9.52	1.05467e+06
9.53	1.21014e+06	9.53	1.0537e+06
9.54	1.21017e+06	9.54	1.05378e+06
9.55	1.21134e+06	9.55	1.05387e+06
9.56	1.21e+06	9.56	1.05454e+06
9.57	1.21009e+06	9.57	1.05312e+06
9.58	1.2102e+06	9.58	1.05429e+06
9.59	1.21032e+06	9.59	1.05436e+06
9.6	1.2109e+06	9.6	1.05472e+06
9.61	1.21e+06	9.61	1.05593e+06
9.62	1.2097e+06	9.62	1.05475e+06
9.63	1.21028e+06	9.63	1.05498e+06
9.64	1.2101e+06	9.64	1.0545e+06
9.65	1.21037e+06	9.65	1.05374e+06
9.66	1.21011e+06	9.66	1.05473e+06
9.67	1.21014e+06	9.67	1.05509e+06
9.68	1.21072e+06	9.68	1.05471e+06
9.69	1.21193e+06	9.69	1.0552e+06
9.7	1.21101e+06	9.7	1.05453e+06
9.71	1.20978e+06	9.71	1.05395e+06
9.72	1.20991e+06	9.72	1.05533e+06
9.73	1.21016e+06	9.73	1.05595e+06
9.74	1.21022e+06	9.74	1.0551e+06
9.75	1.21089e+06	9.75	1.05466e+06
9.76	1.21134e+06	9.76	1.05492e+06
9.77	1.2107e+06	9.77	1.05479e+06
9.78	1.21004e+06	9.78	1.05435e+06
9.79	1.2097e+06	9.79	1.05555e+06
9.8	1.20964e+06	9.8	1.05563e+06
9.81	1.21006e+06	9.81	1.05399e+06
9.82	1.21031e+06	9.82	1.05408e+06
9.83	1.21083e+06	9.83	1.05574e+06
9.84	1.21038e+06	9.84	1.05444e+06
9.85	1.20911e+06	9.85	1.05567e+06
9.86	1.21081e+06	9.86	1.0552e+06
9.87	1.21009e+06	9.87	1.05403e+06
9.88	1.21059e+06	9.88	1.05469e+06
9.89	1.2101e+06	9.89	1.05405e+06
9.9	1.21149e+06	9.9	1.05652e+06
9.91	1.21101e+06	9.91	1.05516e+06
9.92	1.21009e+06	9.92	1.05534e+06
9.93	1.21033e+06	9.93	1.05615e+06
9.94	1.2098e+06	9.94	1.05595e+06
9.95	1.21013e+06	9.95	1.0558e+06
9.96	1.21116e+06	9.96	1.05539e+06
9.97	1.21094e+06	9.97	1.05562e+06
9.98	1.21161e+06	9.98	1.05541e+06
9.99	1.21078e+06	9.99	1.05564e+06
10	1.21111e+06	10	1.05533e+06
10.01	1.21076e+06	10.01	1.05602e+06
10.02	1.21179e+06	10.02	1.05493e+06
10.03	1.21146e+06	10.03	1.05458e+06
10.04	1.211e+06	10.04	1.05562e+06
10.05	1.21186e+06	10.05	1.05504e+06
10.06	1.21162e+06	10.06	1.05552e+06
10.07	1.21117e+06	10.07	1.05543e+06
10.08	1.21005e+06	10.08	1.056e+06
10.09	1.21104e+06	10.09	1.05516e+06
10.1	1.21141e+06	10.1	1.05497e+06
10.11	1.21152e+06	10.11	1.05493e+06
10.12	1.21129e+06	10.12	1.05611e+06
10.13	1.21009e+06	10.13	1.05549e+06
10.14	1.21056e+06	10.14	1.05539e+06
10.15	1.21154e+06	10.15	1.05562e+06
10.16	1.21244e+06	10.16	1.055e+06
10.17	1.21159e+06	10.17	1.05637e+06
10.18	1.21108e+06	10.18	1.0553e+06
10.19	1.21019e+06	10.19	1.05637e+06
10.2	1.20984e+06	10.2	1.056e+06
10.21	1.21163e+06	10.21	1.05618e+06
10.22	1.21241e+06	10.22	1.05543e+06
10.23	1.21212e+06	10.23	1.05687e+06
10.24	1.21172e+06	10.24	1.05692e+06
10.25	1.2121e+06	10.25	1.05712e+06
10.26	1.21164e+06	10.26	1.05648e+06
10.27	1.21109e+06	10.27	1.05595e+06
10.28	1.21063e+06	10.28	1.055e+06
10.29	1.21184e+06	10.29	1.0547e+06
10.3	1.21151e+06	10.3	1.05593e+06
10.31	1.21173e+06	10.31	1.05685e+06
10.32	1.21081e+06	10.32	1.05668e+06
10.33	1.21249e+06	10.33	1.056e+06
10.34	1.21203e+06	10.34	1.05674e+06
10.35	1.21204e+06	10.35	1.0565e+06
10.36	1.21201e+06	10.36	1.0568e+06
10.37	1.21241e+06	10.37	1.05645e+06
10.38	1.21282e+06	10.38	1.0567e+06
10.39	1.21347e+06	10.39	1.05669e+06
10.4	1.21451e+06	10.4	1.05812e+06
10.41	1.21478e+06	10.41	1.05691e+06
10.42	1.21579e+06	10.42	1.05772e+06
10.43	1.21662e+06	10.43	1.05781e+06
10.44	1.21859e+06	10.44	1.05756e+06
10.45	1.21897e+06	10.45	1.05888e+06
10.46	1.22193e+06	10.46	1.06043e+06
10.47	1.22383e+06	10.47	1.05974e+06
10.48	1.22507e+06	10.48	1.06226e+06
10.49	1.22555e+06	10.49	1.06381e+06
10.5	1.22516e+06	10.5	1.06548e+06
10.51	1.22488e+06	10.51	1.06599e+06
10.52	1.22228e+06	10.52	1.06667e+06
10.53	1.22057e+06	10.53	1.06866e+06
10.54	1.21846e+06	10.54	1.06714e+06
10.55	1.21545e+06	10.55	1.066e+06
10.56	1.21546e+06	10.56	1.06314e+06
10.57	1.2146e+06	10.57	1.06131e+06
10.58	1.21321e+06	10.58	1.06001e+06
10.59	1.21253e+06	10.59	1.05793e+06
10.6	1.21259e+06	10.6	1.05768e+06
10.61	1.21211e+06	10.61	1.05715e+06
10.62	1.21214e+06	10.62	1.0574e+06
10.63	1.21124e+06	10.63	1.05712e+06
10.64	1.21226e+06	10.64	1.0566e+06
10.65	1.21248e+06	10.65	1.05711e+06
10.66	1.21228e+06	10.66	1.0576e+06
10.67	1.21205e+06	10.67	1.05825e+06
10.68	1.21117e+06	10.68	1.05832e+06
10.69	1.21212e+06	10.69	1.05722e+06
10.7	1.21311e+06	10.7	1.0573e+06
10.71	1.21301e+06	10.71	1.05623e+06
10.72	1.21307e+06	10.72	1.05715e+06
10.73	1.2122e+06	10.73	1.05739e+06
10.74	1.21221e+06	10.74	1.05599e+06
10.75	1.21166e+06	10.75	1.05604e+06
10.76	1.21205e+06	10.76	1.05735e+06
10.77	1.21245e+06	10.77	1.05715e+06
10.78	1.21236e+06	10.78	1.05863e+06
10.79	1.21235e+06	10.79	1.05648e+06
10.8	1.21299e+06	10.8	1.0569e+06
10.81	1.2128e+06	10.81	1.05684e+06
10.82	1.21228e+06	10.82	1.05759e+06
10.83	1.21221e+06	10.83	1.05646e+06
10.84	1.21291e+06	10.84	1.05818e+06
10.85	1.21335e+06	10.85	1.05853e+06
10.86	1.21275e+06	10.86	1.05726e+06
10.87	1.21228e+06	10.87	1.05724e+06
10.88	1.21336e+06	10.88	1.05747e+06
10.89	1.21332e+06	10.89	1.05713e+06
10.9	1.21337e+06	10.9	1.0565e+06
10.91	1.21393e+06	10.91	1.05665e+06
10.92	1.2139e+06	10.92	1.05655e+06
10.93	1.21449e+06	10.93	1.05826e+06
10.94	1.21355e+06	10.94	1.05782e+06
10.95	1.21368e+06	10.95	1.05822e+06
10.96	1.2163e+06	10.96	1.05912e+06
10.97	1.21761e+06	10.97	1.05953e+06
10.98	1.21794e+06	10.98	1.06084e+06
10.99	1.21821e+06	10.99	1.06001e+06
11	1.21919e+06	11	1.06076e+06
11.01	1.22047e+06	11.01	1.06135e+06
11.02	1.22313e+06	11.02	1.0625e+06
11.03	1.22528e+06	11.03	1.06415e+06
11.04	1.22835e+06	11.04	1.06512e+06
11.05	1.23176e+06	11.05	1.06794e+06
11.06	1.23412e+06	11.06	1.06922e+06
11.07	1.23703e+06	11.07	1.0711e+06
11.08	1.23808e+06	11.08	1.07391e+06
11.09	1.23324e+06	11.09	1.0769e+06
11.1	1.23172e+06	11.1	1.07884e+06
11.11	1.22725e+06	11.11	1.07838e+06
11.12	1.22381e+06	11.12	1.07741e+06
11.13	1.22065e+06	11.13	1.07533e+06
11.14	1.21849e+06	11.14	1.06983e+06
11.15	1.21694e+06	11.15	1.06694e+06
11.16	1.21467e+06	11.16	1.06342e+06
11.17	1.21445e+06	11.17	1.06042e+06
11.18	1.21362e+06	11.18	1.06037e+06
11.19	1.21429e+06	11.19	1.05933e+06
11.2	1.21442e+06	11.2	1.05923e+06
11.21	1.21383e+06	11.21	1.05867e+06
11.22	1.21272e+06	11.22	1.05869e+06
11.23	1.21359e+06	11.23	1.05863e+06
11.24	1.21463e+06	11.24	1.05865e+06
11.25	1.21418e+06	11.25	1.05909e+06
11.26	1.21377e+06	11.26	1.0593e+06
11.27	1.21424e+06	11.27	1.05897e+06
11.28	1.21436e+06	11.28	1.05937e+06
11.29	1.21483e+06	11.29	1.05915e+06
11.3	1.21488e+06	11.3	1.05975e+06
11.31	1.21385e+06	11.31	1.05867e+06
11.32	1.21504e+06	11.32	1.0581e+06
11.33	1.21455e+06	11.33	1.05875e+06
11.34	1.21481e+06	11.34	1.05935e+06
11.35	1.21353e+06	11.35	1.05894e+06
11.36	1.2145e+06	11.36	1.05972e+06
11.37	1.21434e+06	11.37	1.05957e+06
11.38	1.21523e+06	11.38	1.06014e+06
11.39	1.21517e+06	11.39	1.05848e+06
11.4	1.21483e+06	11.4	1.06063e+06
11.41	1.21452e+06	11.41	1.06019e+06
11.42	1.21446e+06	11.42	1.05919e+06
11.43	1.21357e+06	11.43	1.05984e+06
11.44	1.21447e+06	11.44	1.06091e+06
11.45	1.21551e+06	11.45	1.05948e+06
11.46	1.21473e+06	11.46	1.06015e+06
11.47	1.21408e+06	11.47	1.05945e+06
11.48	1.21337e+06	11.48	1.05899e+06
11.49	1.21426e+06	11.49	1.06008e+06
11.5	1.21441e+06	11.5	1.05953e+06
11.51	1.21461e+06	11.51	1.0588e+06
11.52	1.21498e+06	11.52	1.05977e+06
11.53	1.2159e+06	11.53	1.05935e+06
11.54	1.21687e+06	11.54	1.06088e+06
11.55	1.21527e+06	11.55	1.06062e+06
11.56	1.2151e+06	11.56	1.06044e+06
11.57	1.21639e+06	11.57	1.06084e+06
11.58	1.21697e+06	11.58	1.06129e+06
11.59	1.21826e+06	11.59	1.06132e+06
11.6	1.21908e+06	11.6	1.06145e+06
11.61	1.21951e+06	11.61	1.0637e+06
11.62	1.22117e+06	11.62	1.06345e+06
11.63	1.22361e+06	11.63	1.06502e+06
11.64	1.22437e+06	11.64	1.06597e+06
11.65	1.22605e+06	11.65	1.06787e+06
11.66	1.22775e+06	11.66	1.06855e+06
11.67	1.22786e+06	11.67	1.07174e+06
11.68	1.22594e+06	11.68	1.07136e+06
11.69	1.22462e+06	11.69	1.07259e+06
11.7	1.22219e+06	11.7	1.07464e+06
11.71	1.22053e+06	11.71	1.07314e+06
11.72	1.21788e+06	11.72	1.07067e+06
11.73	1.21702e+06	11.73	1.0679e+06
11.74	1.21628e+06	11.74	1.06587e+06
11.75	1.21644e+06	11.75	1.06417e+06
11.76	1.21499e+06	11.76	1.06121e+06
11.77	1.21462e+06	11.77	1.06118e+06
11.78	1.21515e+06	11.78	1.06013e+06
11.79	1.21527e+06	11.79	1.0599e+06
11.8	1.21561e+06	11.8	1.05977e+06
11.81	1.21445e+06	11.81	1.06093e+06
11.82	1.21453e+06	11.82	1.05992e+06
11.83	1.21472e+06	11.83	1.05967e+06
11.84	1.21565e+06	11.84	1.06001e+06
11.85	1.21594e+06	11.85	1.06005e+06
11.86	1.2159e+06	11.86	1.0592e+06
11.87	1.21516e+06	11.87	1.05883e+06
11.88	1.2159e+06	11.88	1.06143e+06
11.89	1.21496e+06	11.89	1.06013e+06
11.9	1.21498e+06	11.9	1.0595e+06
11.91	1.21479e+06	11.91	1.06052e+06
11.92	1.21545e+06	11.92	1.06002e+06
11.93	1.21625e+06	11.93	1.05928e+06
11.94	1.21643e+06	11.94	1.05964e+06
11.95	1.21502e+06	11.95	1.05943e+06
11.96	1.21564e+06	11.96	1.05904e+06
11.97	1.21514e+06	11.97	1.06089e+06
11.98	1.21607e+06	11.98	1.0612e+06
11.99	1.21512e+06	11.99	1.06044e+06
12	1.21532e+06	12	1.05947e+06
12.01	1.21569e+06	12.01	1.06026e+06
12.02	1.2152e+06	12.02	1.06174e+06
12.03	1.21476e+06	12.03	1.06067e+06
12.04	1.21587e+06	12.04	1.06102e+06
12.05	1.21464e+06	12.05	1.06028e+06
12.06	1.21551e+06	12.06	1.06074e+06
12.07	1.21431e+06	12.07	1.05972e+06
12.08	1.21442e+06	12.08	1.06035e+06
12.09	1.21553e+06	12.09	1.06158e+06
12.1	1.21543e+06	12.1	1.06107e+06
12.11	1.21535e+06	12.11	1.06024e+06
12.12	1.21514e+06	12.12	1.05969e+06
12.13	1.21477e+06	12.13	1.06038e+06
12.14	1.21545e+06	12.14	1.06217e+06
12.15	1.21648e+06	12.15	1.0612e+06
12.16	1.21615e+06	12.16	1.0605e+06
12.17	1.21582e+06	12.17	1.06055e+06
12.18	1.21545e+06	12.18	1.06083e+06
12.19	1.21592e+06	12.19	1.06124e+06
12.2	1.21651e+06	12.2	1.06223e+06
12.21	1.21579e+06	12.21	1.06059e+06
12.22	1.21579e+06	12.22	1.06066e+06
12.23	1.21547e+06	12.23	1.05993e+06
12.24	1.21624e+06	12.24	1.0613e+06
12.25	1.21633e+06	12.25	1.06108e+06
12.26	1.21565e+06	12.26	1.06184e+06
12.27	1.21569e+06	12.27	1.06256e+06
12.28	1.21559e+06	12.28	1.06212e+06
12.29	1.21714e+06	12.29	1.06181e+06
12.3	1.21631e+06	12.3	1.06203e+06
12.31	1.21696e+06	12.31	1.06139e+06
12.32	1.21589e+06	12.32	1.06175e+06
12.33	1.21696e+06	12.33	1.06233e+06
12.34	1.21762e+06	12.34	1.06143e+06
12.35	1.21684e+06	12.35	1.06143e+06
12.36	1.21634e+06	12.36	1.06205e+06
12.37	1.21533e+06	12.37	1.06086e+06
12.38	1.2171e+06	12.38	1.06128e+06
12.39	1.21556e+06	12.39	1.06071e+06
12.4	1.21801e+06	12.4	1.0614e+06
12.41	1.21717e+06	12.41	1.06286e+06
12.42	1.21578e+06	12.42	1.06162e+06
12.43	1.21583e+06	12.43	1.06161e+06
12.44	1.21668e+06	12.44	1.06065e+06
12.45	1.2161e+06	12.45	1.06097e+06
12.46	1.21588e+06	12.46	1.06181e+06
12.47	1.21672e+06	12.47	1.06046e+06
12.48	1.21681e+06	12.48	1.06068e+06
12.49	1.21586e+06	12.49	1.06131e+06
12.5	1.21496e+06	12.5	1.06155e+06
12.51	1.21692e+06	12.51	1.06158e+06
12.52	1.21623e+06	12.52	1.06252e+06
12.53	1.21704e+06	12.53	1.06149e+06
12.54	1.21596e+06	12.54	1.06179e+06
12.55	1.21672e+06	12.55	1.06086e+06
12.56	1.21671e+06	12.56	1.06171e+06
12.57	1.21729e+06	12.57	1.06157e+06
12.58	1.21706e+06	12.58	1.06113e+06
12.59	1.21733e+06	12.59	1.06232e+06
12.6	1.21596e+06	12.6	1.06185e+06
12.61	1.2172e+06	12.61	1.06291e+06
12.62	1.21698e+06	12.62	1.06162e+06
12.63	1.21592e+06	12.63	1.0627e+06
12.64	1.21785e+06	12.64	1.06111e+06
12.65	1.2174e+06	12.65	1.06151e+06
12.66	1.21639e+06	12.66	1.06192e+06
12.67	1.21676e+06	12.67	1.06207e+06
12.68	1.21784e+06	12.68	1.06188e+06
12.69	1.21775e+06	12.69	1.0628e+06
12.7	1.21787e+06	12.7	1.0628e+06
12.71	1.21772e+06	12.71	1.06225e+06
12.72	1.21859e+06	12.72	1.06299e+06
12.73	1.2202e+06	12.73	1.06371e+06
12.74	1.21957e+06	12.74	1.06452e+06
12.75	1.22138e+06	12.75	1.06486e+06
12.76	1.2223e+06	12.76	1.06457e+06
12.77	1.22203e+06	12.77	1.06455e+06
12.78	1.22406e+06	12.78	1.0662e+06
12.79	1.22556e+06	12.79	1.06754e+06
12.8	1.22909e+06	12.8	1.06797e+06
12.81	1.23085e+06	12.81	1.06876e+06
12.82	1.23051e+06	12.82	1.07042e+06
12.83	1.23093e+06	12.83	1.07157e+06
12.84	1.22862e+06	12.84	1.07338e+06
12.85	1.22795e+06	12.85	1.07431e+06
12.86	1.22715e+06	12.86	1.07632e+06
12.87	1.22432e+06	12.87	1.07565e+06
12.88	1.22312e+06	12.88	1.07428e+06
12.89	1.22114e+06	12.89	1.07025e+06
12.9	1.22021e+06	12.9	1.06871e+06
12.91	1.21916e+06	12.91	1.06819e+06
12.92	1.21833e+06	12.92	1.06576e+06
12.93	1.21902e+06	12.93	1.0634e+06
12.94	1.21861e+06	12.94	1.06352e+06
12.95	1.21891e+06	12.95	1.06403e+06
12.96	1.21876e+06	12.96	1.0635e+06
12.97	1.21917e+06	12.97	1.06345e+06
12.98	1.21953e+06	12.98	1.06435e+06
12.99	1.22096e+06	12.99	1.06474e+06
13	1.22089e+06	13	1.06509e+06
13.01	1.2224e+06	13.01	1.06624e+06
13.02	1.22333e+06	13.02	1.06685e+06
13.03	1.22602e+06	13.03	1.0686e+06
13.04	1.2249e+06	13.04	1.06961e+06
13.05	1.22605e+06	13.05	1.0696e+06
13.06	1.22662e+06	13.06	1.0729e+06
13.07	1.22564e+06	13.07	1.07251e+06
13.08	1.22582e+06	13.08	1.07528e+06
13.09	1.22277e+06	13.09	1.07534e+06
13.1	1.22313e+06	13.1	1.07526e+06
13.11	1.22049e+06	13.11	1.07455e+06
13.12	1.21911e+06	13.12	1.07222e+06
13.13	1.21992e+06	13.13	1.06967e+06
13.14	1.21859e+06	13.14	1.06844e+06
13.15	1.2182e+06	13.15	1.06633e+06
13.16	1.21793e+06	13.16	1.06415e+06
13.17	1.21782e+06	13.17	1.06438e+06
13.18	1.21844e+06	13.18	1.06475e+06
13.19	1.21777e+06	13.19	1.06432e+06
13.2	1.21731e+06	13.2	1.06349e+06
13.21	1.21772e+06	13.21	1.06353e+06
13.22	1.2171e+06	13.22	1.06429e+06
13.23	1.21834e+06	13.23	1.06432e+06
13.24	1.21754e+06	13.24	1.06264e+06
13.25	1.21746e+06	13.25	1.06317e+06
13.26	1.21744e+06	13.26	1.06321e+06
13.27	1.21774e+06	13.27	1.06352e+06
13.28	1.21699e+06	13.28	1.0634e+06
13.29	1.21821e+06	13.29	1.06432e+06
13.3	1.21712e+06	13.3	1.06384e+06
13.31	1.21824e+06	13.31	1.06489e+06
13.32	1.21847e+06	13.32	1.0653e+06
13.33	1.21738e+06	13.33	1.06289e+06
13.34	1.21836e+06	13.34	1.06406e+06
13.35	1.21726e+06	13.35	1.06261e+06
13.36	1.2177e+06	13.36	1.06316e+06
13.37	1.21792e+06	13.37	1.06429e+06
13.38	1.21777e+06	13.38	1.06447e+06
13.39	1.21897e+06	13.39	1.06411e+06
13.4	1.21931e+06	13.4	1.06374e+06
13.41	1.21912e+06	13.41	1.06344e+06
13.42	1.21662e+06	13.42	1.06435e+06
13.43	1.2188e+06	13.43	1.0639e+06
13.44	1.21895e+06	13.44	1.06427e+06
13.45	1.21933e+06	13.45	1.06356e+06
13.46	1.22003e+06	13.46	1.06299e+06
13.47	1.22e+06	13.47	1.06439e+06
13.48	1.22168e+06	13.48	1.06412e+06
13.49	1.22101e+06	13.49	1.0645e+06
13.5	1.22131e+06	13.5	1.06513e+06
13.51	1.22145e+06	13.51	1.06529e+06
13.52	1.2223e+06	13.52	1.06643e+06
13.53	1.22239e+06	13.53	1.06623e+06
13.54	1.22487e+06	13.54	1.06775e+06
13.55	1.22713e+06	13.55	1.06741e+06
13.56	1.22844e+06	13.56	1.069e+06
13.57	1.23094e+06	13.57	1.06954e+06
13.58	1.23188e+06	13.58	1.07025e+06
13.59	1.23234e+06	13.59	1.07169e+06
13.6	1.23176e+06	13.6	1.07289e+06
13.61	1.23115e+06	13.61	1.07412e+06
13.62	1.22993e+06	13.62	1.0778e+06
13.63	1.22717e+06	13.63	1.0761e+06
13.64	1.2264e+06	13.64	1.07692e+06
13.65	1.22575e+06	13.65	1.07435e+06
13.66	1.2224e+06	13.66	1.07232e+06
13.67	1.22196e+06	13.67	1.06976e+06
13.68	1.22192e+06	13.68	1.0693e+06
13.69	1.22155e+06	13.69	1.06822e+06
13.7	1.22056e+06	13.7	1.06658e+06
13.71	1.21978e+06	13.71	1.06648e+06
13.72	1.22125e+06	13.72	1.06606e+06
13.73	1.22117e+06	13.73	1.06596e+06
13.74	1.22224e+06	13.74	1.06608e+06
13.75	1.22219e+06	13.75	1.06716e+06
13.76	1.22298e+06	13.76	1.06659e+06
13.77	1.22476e+06	13.77	1.06709e+06
13.78	1.22439e+06	13.78	1.06707e+06
13.79	1.22652e+06	13.79	1.06787e+06
13.8	1.228e+06	13.8	1.07063e+06
13.81	1.23038e+06	13.81	1.06922e+06
13.82	1.23136e+06	13.82	1.07181e+06
13.83	1.23154e+06	13.83	1.0718e+06
13.84	1.23132e+06	13.84	1.07324e+06
13.85	1.22858e+06	13.85	1.0744e+06
13.86	1.22846e+06	13.86	1.07461e+06
13.87	1.22704e+06	13.87	1.07559e+06
13.88	1.22485e+06	13.88	1.07465e+06
13.89	1.2216e+06	13.89	1.07356e+06
13.9	1.22137e+06	13.9	1.07175e+06
13.91	1.22068e+06	13.91	1.06931e+06
13.92	1.22008e+06	13.92	1.06866e+06
13.93	1.22056e+06	13.93	1.06729e+06
13.94	1.22019e+06	13.94	1.06571e+06
13.95	1.21966e+06	13.95	1.06529e+06
13.96	1.21892e+06	13.96	1.06566e+06
13.97	1.21994e+06	13.97	1.06437e+06
13.98	1.2189e+06	13.98	1.06522e+06
13.99	1.21892e+06	13.99	1.06554e+06
14	1.22e+06	14	1.06575e+06
14.01	1.21936e+06	14.01	1.06475e+06
14.02	1.21924e+06	14.02	1.06444e+06
14.03	1.21919e+06	14.03	1.0649e+06
14.04	1.22023e+06	14.04	1.0657e+06
14.05	1.2196e+06	14.05	1.06498e+06
14.06	1.21899e+06	14.06	1.0662e+06
14.07	1.21938e+06	14.07	1.06524e+06
14.08	1.21822e+06	14.08	1.06568e+06
14.09	1.21892e+06	14.09	1.06515e+06
14.1	1.22035e+06	14.1	1.06616e+06
14.11	1.21934e+06	14.11	1.06502e+06
14.12	1.21858e+06	14.12	1.0642e+06
14.13	1.21976e+06	14.13	1.06666e+06
14.14	1.22031e+06	14.14	1.06559e+06
14.15	1.22101e+06	14.15	1.06423e+06
14.16	1.21921e+06	14.16	1.06464e+06
14.17	1.21879e+06	14.17	1.06514e+06
14.18	1.21972e+06	14.18	1.06504e+06
14.19	1.22083e+06	14.19	1.06495e+06
14.2	1.21892e+06	14.2	1.06504e+06
14.21	1.21991e+06	14.21	1.0663e+06
14.22	1.21874e+06	14.22	1.06614e+06
14.23	1.21933e+06	14.23	1.06531e+06
14.24	1.21991e+06	14.24	1.06488e+06
14.25	1.21897e+06	14.25	1.06547e+06
14.26	1.22021e+06	14.26	1.0661e+06
14.27	1.21882e+06	14.27	1.06499e+06
14.28	1.22005e+06	14.28	1.06552e+06
14.29	1.2197e+06	14.29	1.06606e+06
14.3	1.21878e+06	14.3	1.06576e+06
14.31	1.21955e+06	14.31	1.06569e+06
14.32	1.21982e+06	14.32	1.06625e+06
14.33	1.2202e+06	14.33	1.06548e+06
14.34	1.2201e+06	14.34	1.06552e+06
14.35	1.22075e+06	14.35	1.06611e+06
14.36	1.21974e+06	14.36	1.06636e+06
14.37	1.2194e+06	14.37	1.06626e+06
14.38	1.21948e+06	14.38	1.06588e+06
14.39	1.2205e+06	14.39	1.06596e+06
14.4	1.21958e+06	14.4	1.0654e+06
14.41	1.22078e+06	14.41	1.06691e+06
14.42	1.22157e+06	14.42	1.06638e+06
14.43	1.21916e+06	14.43	1.06507e+06
14.44	1.22014e+06	14.44	1.06656e+06
14.45	1.22096e+06	14.45	1.06527e+06
14.46	1.2201e+06	14.46	1.06709e+06
14.47	1.21893e+06	14.47	1.06603e+06
14.48	1.22061e+06	14.48	1.06617e+06
14.49	1.22145e+06	14.49	1.06695e+06
14.5	1.22007e+06	14.5	1.06702e+06
14.51	1.22178e+06	14.51	1.06618e+06
14.52	1.22155e+06	14.52	1.06683e+06
14.53	1.22106e+06	14.53	1.06589e+06
14.54	1.22068e+06	14.54	1.0656e+06
14.55	1.22129e+06	14.55	1.06624e+06
14.56	1.22108e+06	14.56	1.06706e+06
14.57	1.22148e+06	14.57	1.06734e+06
14.58	1.22101e+06	14.58	1.06699e+06
14.59	1.22024e+06	14.59	1.06688e+06
14.6	1.22059e+06	14.6	1.06693e+06
14.61	1.22149e+06	14.61	1.06619e+06
14.62	1.22239e+06	14.62	1.06739e+06
14.63	1.22031e+06	14.63	1.06731e+06
14.64	1.22041e+06	14.64	1.06676e+06
14.65	1.22155e+06	14.65	1.06709e+06
14.66	1.22191e+06	14.66	1.06706e+06
14.67	1.223e+06	14.67	1.06647e+06
14.68	1.22081e+06	14.68	1.06617e+06
14.69	1.22294e+06	14.69	1.06991e+06
14.7	1.2221e+06	14.7	1.06947e+06
14.71	1.22303e+06	14.71	1.0699e+06
14.72	1.22308e+06	14.72	1.07008e+06
14.73	1.22228e+06	14.73	1.06944e+06
14.74	1.22402e+06	14.74	1.07091e+06
14.75	1.22324e+06	14.75	1.07342e+06
14.76	1.22556e+06	14.76	1.07272e+06
14.77	1.22508e+06	14.77	1.07471e+06
14.78	1.225e+06	14.78	1.07497e+06
14.79	1.22518e+06	14.79	1.07616e+06
14.8	1.22414e+06	14.8	1.07891e+06
14.81	1.22398e+06	14.81	1.07796e+06
14.82	1.22271e+06	14.82	1.07591e+06
14.83	1.22331e+06	14.83	1.07613e+06
14.84	1.22303e+06	14.84	1.07404e+06
14.85	1.22222e+06	14.85	1.07272e+06
14.86	1.22295e+06	14.86	1.07179e+06
14.87	1.22237e+06	14.87	1.07158e+06
14.88	1.22134e+06	14.88	1.06941e+06
14.89	1.2206e+06	14.89	1.06764e+06
14.9	1.22205e+06	14.9	1.06865e+06
14.91	1.22169e+06	14.91	1.06694e+06
14.92	1.22221e+06	14.92	1.06798e+06
14.93	1.22194e+06	14.93	1.06788e+06
14.94	1.22154e+06	14.94	1.06763e+06
14.95	1.22219e+06	14.95	1.06877e+06
14.96	1.22183e+06	14.96	1.06645e+06
14.97	1.22247e+06	14.97	1.0666e+06
14.98	1.2223e+06	14.98	1.06647e+06
14.99	1.22329e+06	14.99	1.06739e+06
15	1.22158e+06	15	1.06871e+06
15.01	1.22199e+06	15.01	1.06793e+06
15.02	1.22108e+06	15.02	1.06886e+06
15.03	1.22316e+06	15.03	1.06754e+06
15.04	1.22314e+06	15.04	1.06895e+06
15.05	1.22247e+06	15.05	1.06855e+06
15.06	1.22346e+06	15.06	1.06911e+06
15.07	1.22347e+06	15.07	1.0681e+06
15.08	1.22325e+06	15.08	1.06853e+06
15.09	1.22363e+06	15.09	1.06939e+06
15.1	1.22464e+06	15.1	1.06916e+06
15.11	1.22529e+06	15.11	1.07e+06
15.12	1.22489e+06	15.12	1.07109e+06
15.13	1.2278e+06	15.13	1.0709e+06
15.14	1.22895e+06	15.14	1.07084e+06
15.15	1.23109e+06	15.15	1.07357e+06
15.16	1.23473e+06	15.16	1.07366e+06
15.17	1.23585e+06	15.17	1.07449e+06
15.18	1.23968e+06	15.18	1.07917e+06
15.19	1.24298e+06	15.19	1.07942e+06
15.2	1.24452e+06	15.2	1.08247e+06
15.21	1.24552e+06	15.21	1.08738e+06
15.22	1.24697e+06	15.22	1.09086e+06
15.23	1.24395e+06	15.23	1.09319e+06
15.24	1.24209e+06	15.24	1.09576e+06
15.25	1.2384e+06	15.25	1.09584e+06
15.26	1.23455e+06	15.26	1.09591e+06
15.27	1.23124e+06	15.27	1.09251e+06
15.28	1.23039e+06	15.28	1.0875e+06
15.29	1.22687e+06	15.29	1.08456e+06
15.3	1.22528e+06	15.3	1.08007e+06
15.31	1.22432e+06	15.31	1.07571e+06
15.32	1.22414e+06	15.32	1.07297e+06
15.33	1.2233e+06	15.33	1.07272e+06
15.34	1.22334e+06	15.34	1.07081e+06
15.35	1.22263e+06	15.35	1.06911e+06
15.36	1.22299e+06	15.36	1.06835e+06
15.37	1.22237e+06	15.37	1.06725e+06
15.38	1.22323e+06	15.38	1.06787e+06
15.39	1.22419e+06	15.39	1.06885e+06
15.4	1.2228e+06	15.4	1.06975e+06
15.41	1.22142e+06	15.41	1.06912e+06
15.42	1.22259e+06	15.42	1.0674e+06
15.43	1.2217e+06	15.43	1.06895e+06
15.44	1.22258e+06	15.44	1.06783e+06
15.45	1.22265e+06	15.45	1.06811e+06
15.46	1.22241e+06	15.46	1.0698e+06
15.47	1.22289e+06	15.47	1.06882e+06
15.48	1.22281e+06	15.48	1.06859e+06
15.49	1.22405e+06	15.49	1.06843e+06
15.5	1.22409e+06	15.5	1.06915e+06
15.51	1.2227e+06	15.51	1.06773e+06
15.52	1.22243e+06	15.52	1.06755e+06
15.53	1.22209e+06	15.53	1.06713e+06
15.54	1.22339e+06	15.54	1.067e+06
15.55	1.22417e+06	15.55	1.06761e+06
15.56	1.22404e+06	15.56	1.06812e+06
15.57	1.22373e+06	15.57	1.06993e+06
15.58	1.22407e+06	15.58	1.07066e+06
15.59	1.22459e+06	15.59	1.0691e+06
15.6	1.22399e+06	15.6	1.06894e+06
15.61	1.22679e+06	15.61	1.07048e+06
15.62	1.22528e+06	15.62	1.07125e+06
15.63	1.22608e+06	15.63	1.06953e+06
15.64	1.22775e+06	15.64	1.07059e+06
15.65	1.22903e+06	15.65	1.07074e+06
15.66	1.23038e+06	15.66	1.07234e+06
15.67	1.23016e+06	15.67	1.07404e+06
15.68	1.23005e+06	15.68	1.07474e+06
15.69	1.22994e+06	15.69	1.07495e+06
15.7	1.22971e+06	15.7	1.07464e+06
15.71	1.22947e+06	15.71	1.07498e+06
15.72	1.22775e+06	15.72	1.07553e+06
15.73	1.22757e+06	15.73	1.0737e+06
15.74	1.22516e+06	15.74	1.07294e+06
15.75	1.22533e+06	15.75	1.07282e+06
15.76	1.22436e+06	15.76	1.07163e+06
15.77	1.2242e+06	15.77	1.07112e+06
15.78	1.2241e+06	15.78	1.06968e+06
15.79	1.22384e+06	15.79	1.06956e+06
15.8	1.22311e+06	15.8	1.06935e+06
15.81	1.22527e+06	15.81	1.06946e+06
15.82	1.22364e+06	15.82	1.06908e+06
15.83	1.22422e+06	15.83	1.06818e+06
15.84	1.22288e+06	15.84	1.06753e+06
15.85	1.22383e+06	15.85	1.06874e+06
15.86	1.22269e+06	15.86	1.06929e+06
15.87	1.22463e+06	15.87	1.06876e+06
15.88	1.22415e+06	15.88	1.06833e+06
15.89	1.22333e+06	15.89	1.06866e+06
15.9	1.22197e+06	15.9	1.06748e+06
15.91	1.22462e+06	15.91	1.06917e+06
15.92	1.22297e+06	15.92	1.06867e+06
15.93	1.22206e+06	15.93	1.06824e+06
15.94	1.22383e+06	15.94	1.06901e+06
15.95	1.22326e+06	15.95	1.06968e+06
15.96	1.22296e+06	15.96	1.06972e+06
15.97	1.22244e+06	15.97	1.06877e+06
15.98	1.22298e+06	15.98	1.06877e+06
15.99	1.22322e+06	15.99	1.06959e+06
16	1.2238e+06	16	1.06958e+06
16.01	1.22398e+06	16.01	1.07055e+06
16.02	1.22376e+06	16.02	1.06944e+06
16.03	1.22325e+06	16.03	1.07011e+06
16.04	1.2234e+06	16.04	1.0696e+06
16.05	1.22297e+06	16.05	1.07001e+06
16.06	1.22492e+06	16.06	1.06856e+06
16.07	1.22462e+06	16.07	1.06886e+06
16.08	1.22368e+06	16.08	1.07105e+06
16.09	1.22386e+06	16.09	1.0704e+06
16.1	1.22424e+06	16.1	1.06985e+06
16.11	1.22451e+06	16.11	1.07032e+06
16.12	1.22476e+06	16.12	1.06846e+06
16.13	1.22428e+06	16.13	1.06946e+06
16.14	1.22412e+06	16.14	1.07014e+06
16.15	1.22386e+06	16.15	1.0686e+06
16.16	1.22465e+06	16.16	1.07031e+06
16.17	1.22425e+06	16.17	1.06834e+06
16.18	1.22409e+06	16.18	1.07021e+06
16.19	1.22402e+06	16.19	1.06925e+06
16.2	1.22461e+06	16.2	1.06924e+06
16.21	1.22442e+06	16.21	1.06998e+06
16.22	1.22437e+06	16.22	1.06913e+06
16.23	1.22304e+06	16.23	1.07095e+06
16.24	1.22449e+06	16.24	1.07058e+06
16.25	1.22496e+06	16.25	1.07054e+06
16.26	1.22429e+06	16.26	1.06977e+06
16.27	1.22373e+06	16.27	1.07001e+06
16.28	1.22338e+06	16.28	1.07019e+06
16.29	1.22469e+06	16.29	1.07052e+06
16.3	1.22318e+06	16.3	1.07024e+06
16.31	1.22444e+06	16.31	1.07002e+06
16.32	1.22512e+06	16.32	1.07067e+06
16.33	1.22445e+06	16.33	1.07041e+06
16.34	1.22483e+06	16.34	1.071e+06
16.35	1.22524e+06	16.35	1.06947e+06
16.36	1.22486e+06	16.36	1.0688e+06
16.37	1.22464e+06	16.37	1.06962e+06
16.38	1.22457e+06	16.38	1.07037e+06
16.39	1.22324e+06	16.39	1.07017e+06
16.4	1.22448e+06	16.4	1.06924e+06
16.41	1.22463e+06	16.41	1.07129e+06
16.42	1.22476e+06	16.42	1.07005e+06
16.43	1.22523e+06	16.43	1.07044e+06
16.44	1.22527e+06	16.44	1.06849e+06
16.45	1.22444e+06	16.45	1.06919e+06
16.46	1.22369e+06	16.46	1.06943e+06
16.47	1.22531e+06	16.47	1.06934e+06
16.48	1.22431e+06	16.48	1.06914e+06
16.49	1.2252e+06	16.49	1.06945e+06
16.5	1.22599e+06	16.5	1.07108e+06
16.51	1.22573e+06	16.51	1.07016e+06
16.52	1.22545e+06	16.52	1.07074e+06
16.53	1.22545e+06	16.53	1.0701e+06
16.54	1.22462e+06	16.54	1.07004e+06
16.55	1.226e+06	16.55	1.07133e+06
16.56	1.22565e+06	16.56	1.06994e+06
16.57	1.22559e+06	16.57	1.07014e+06
16.58	1.22594e+06	16.58	1.06992e+06
16.59	1.22555e+06	16.59	1.07045e+06
16.6	1.22651e+06	16.6	1.07027e+06
16.61	1.22532e+06	16.61	1.06964e+06
16.62	1.22666e+06	16.62	1.06963e+06
16.63	1.22543e+06	16.63	1.07005e+06
16.64	1.22725e+06	16.64	1.07124e+06
16.65	1.22726e+06	16.65	1.07029e+06
16.66	1.22663e+06	16.66	1.07073e+06
16.67	1.22829e+06	16.67	1.07129e+06
16.68	1.22718e+06	16.68	1.07129e+06
16.69	1.22772e+06	16.69	1.07075e+06
16.7	1.22946e+06	16.7	1.07212e+06
16.71	1.23172e+06	16.71	1.07282e+06
16.72	1.234e+06	16.72	1.07287e+06
16.73	1.23455e+06	16.73	1.07275e+06
16.74	1.2369e+06	16.74	1.07316e+06
16.75	1.23761e+06	16.75	1.07584e+06
16.76	1.23821e+06	16.76	1.07683e+06
16.77	1.24021e+06	16.77	1.07845e+06
16.78	1.24051e+06	16.78	1.08041e+06
16.79	1.23903e+06	16.79	1.08219e+06
16.8	1.23701e+06	16.8	1.08243e+06
16.81	1.2368e+06	16.81	1.08384e+06
16.82	1.2343e+06	16.82	1.08185e+06
16.83	1.2322e+06	16.83	1.08203e+06
16.84	1.23035e+06	16.84	1.07777e+06
16.85	1.22977e+06	16.85	1.07807e+06
16.86	1.2277e+06	16.86	1.07646e+06
16.87	1.22786e+06	16.87	1.07409e+06
16.88	1.22679e+06	16.88	1.07349e+06
16.89	1.22565e+06	16.89	1.07236e+06
16.9	1.22514e+06	16.9	1.07093e+06
16.91	1.22701e+06	16.91	1.07164e+06
16.92	1.22663e+06	16.92	1.0706e+06
16.93	1.22661e+06	16.93	1.07132e+06
16.94	1.22753e+06	16.94	1.07185e+06
16.95	1.22599e+06	16.95	1.07236e+06
16.96	1.22728e+06	16.96	1.07112e+06
16.97	1.22569e+06	16.97	1.0719e+06
16.98	1.22759e+06	16.98	1.07279e+06
16.99	1.22688e+06	16.99	1.07214e+06
17	1.22673e+06	17	1.07329e+06
17.01	1.22796e+06	17.01	1.07255e+06
17.02	1.23091e+06	17.02	1.07203e+06
17.03	1.23007e+06	17.03	1.07268e+06
17.04	1.23172e+06	17.04	1.07301e+06
17.05	1.23249e+06	17.05	1.07384e+06
17.06	1.23645e+06	17.06	1.07477e+06
17.07	1.24042e+06	17.07	1.076e+06
17.08	1.24112e+06	17.08	1.07747e+06
17.09	1.24513e+06	17.09	1.07904e+06
17.1	1.24555e+06	17.1	1.08095e+06
17.11	1.24914e+06	17.11	1.08349e+06
17.12	1.24909e+06	17.12	1.08644e+06
17.13	1.24864e+06	17.13	1.08826e+06
17.14	1.2456e+06	17.14	1.08994e+06
17.15	1.24335e+06	17.15	1.09133e+06
17.16	1.24255e+06	17.16	1.09245e+06
17.17	1.23816e+06	17.17	1.09079e+06
17.18	1.23809e+06	17.18	1.08702e+06
17.19	1.23438e+06	17.19	1.08439e+06
17.2	1.23519e+06	17.2	1.08235e+06
17.21	1.23429e+06	17.21	1.0807e+06
17.22	1.23411e+06	17.22	1.07937e+06
17.23	1.2348e+06	17.23	1.07831e+06
17.24	1.23571e+06	17.24	1.07838e+06
17.25	1.23901e+06	17.25	1.08045e+06
17.26	1.24069e+06	17.26	1.08148e+06
17.27	1.24421e+06	17.27	1.08262e+06
17.28	1.24668e+06	17.28	1.08655e+06
17.29	1.24926e+06	17.29	1.08955e+06
17.3	1.25059e+06	17.3	1.09376e+06
17.31	1.25246e+06	17.31	1.10049e+06
17.32	1.25017e+06	17.32	1.10351e+06
17.33	1.24771e+06	17.33	1.10838e+06
17.34	1.24684e+06	17.34	1.11032e+06
17.35	1.2418e+06	17.35	1.10902e+06
17.36	1.23756e+06	17.36	1.10781e+06
17.37	1.23503e+06	17.37	1.10232e+06
17.38	1.23227e+06	17.38	1.09442e+06
17.39	1.23281e+06	17.39	1.09069e+06
17.4	1.22905e+06	17.4	1.08699e+06
17.41	1.22938e+06	17.41	1.08307e+06
17.42	1.22801e+06	17.42	1.07893e+06
17.43	1.22819e+06	17.43	1.07455e+06
17.44	1.22742e+06	17.44	1.07396e+06
17.45	1.22781e+06	17.45	1.07332e+06
17.46	1.22699e+06	17.46	1.07242e+06
17.47	1.22678e+06	17.47	1.0732e+06
17.48	1.22709e+06	17.48	1.07355e+06
17.49	1.22761e+06	17.49	1.07229e+06
17.5	1.22671e+06	17.5	1.07206e+06
17.51	1.22794e+06	17.51	1.07249e+06
17.52	1.22873e+06	17.52	1.07302e+06
17.53	1.22682e+06	17.53	1.07116e+06
17.54	1.22732e+06	17.54	1.07185e+06
17.55	1.22638e+06	17.55	1.07094e+06
17.56	1.22665e+06	17.56	1.07317e+06
17.57	1.22791e+06	17.57	1.07232e+06
17.58	1.22761e+06	17.58	1.07184e+06
17.59	1.22641e+06	17.59	1.07214e+06
17.6	1.22602e+06	17.6	1.07265e+06
17.61	1.2286e+06	17.61	1.0721e+06
17.62	1.22764e+06	17.62	1.07124e+06
17.63	1.2272e+06	17.63	1.07049e+06
17.64	1.22637e+06	17.64	1.07191e+06
17.65	1.22766e+06	17.65	1.07177e+06
17.66	1.22753e+06	17.66	1.07182e+06
17.67	1.2268e+06	17.67	1.07146e+06
17.68	1.2271e+06	17.68	1.07191e+06
17.69	1.2277e+06	17.69	1.0723e+06
17.7	1.22781e+06	17.7	1.07258e+06
17.71	1.22829e+06	17.71	1.07125e+06
17.72	1.22776e+06	17.72	1.07217e+06
17.73	1.22684e+06	17.73	1.07254e+06
17.74	1.22662e+06	17.74	1.0735e+06
17.75	1.22742e+06	17.75	1.07065e+06
17.76	1.22675e+06	17.76	1.07164e+06
17.77	1.22765e+06	17.77	1.07247e+06
17.78	1.22712e+06	17.78	1.07178e+06
17.79	1.22699e+06	17.79	1.0704e+06
17.8	1.2274e+06	17.8	1.07129e+06
17.81	1.2274e+06	17.81	1.07232e+06
17.82	1.22782e+06	17.82	1.07231e+06
17.83	1.22738e+06	17.83	1.07244e+06
17.84	1.22727e+06	17.84	1.07269e+06
17.85	1.22895e+06	17.85	1.07105e+06
17.86	1.22886e+06	17.86	1.07201e+06
17.87	1.22721e+06	17.87	1.07237e+06
17.88	1.22886e+06	17.88	1.07209e+06
17.89	1.22902e+06	17.89	1.07365e+06
17.9	1.22945e+06	17.9	1.07275e+06
17.91	1.22872e+06	17.91	1.07387e+06
17.92	1.23001e+06	17.92	1.07375e+06
17.93	1.22938e+06	17.93	1.07339e+06
17.94	1.23052e+06	17.94	1.07343e+06
17.95	1.23006e+06	17.95	1.07229e+06
17.96	1.23124e+06	17.96	1.07349e+06
17.97	1.23188e+06	17.97	1.07366e+06
17.98	1.23315e+06	17.98	1.07501e+06
17.99	1.23518e+06	17.99	1.0754e+06
18	1.23533e+06	18	1.07805e+06
18.01	1.2391e+06	18.01	1.07693e+06
18.02	1.23967e+06	18.02	1.07808e+06
18.03	1.245e+06	18.03	1.07994e+06
18.04	1.24577e+06	18.04	1.08228e+06
18.05	1.24839e+06	18.05	1.08596e+06
18.06	1.25315e+06	18.06	1.08806e+06
18.07	1.25899e+06	18.07	1.09214e+06
18.08	1.26459e+06	18.08	1.09581e+06
18.09	1.27015e+06	18.09	1.10047e+06
18.1	1.27353e+06	18.1	1.106e+06
18.11	1.27538e+06	18.11	1.11135e+06
18.12	1.27858e+06	18.12	1.1184e+06
18.13	1.27266e+06	18.13	1.12344e+06
18.14	1.26921e+06	18.14	1.13121e+06
18.15	1.26323e+06	18.15	1.13298e+06
18.16	1.25746e+06	18.16	1.13033e+06
18.17	1.25322e+06	18.17	1.12708e+06
18.18	1.24814e+06	18.18	1.11862e+06
18.19	1.24494e+06	18.19	1.10891e+06
18.2	1.24033e+06	18.2	1.10394e+06
18.21	1.23549e+06	18.21	1.0966e+06
18.22	1.23554e+06	18.22	1.09037e+06
18.23	1.23439e+06	18.23	1.08499e+06
18.24	1.23166e+06	18.24	1.0792e+06
18.25	1.22982e+06	18.25	1.07826e+06
18.26	1.22999e+06	18.26	1.07608e+06
18.27	1.22994e+06	18.27	1.07515e+06
18.28	1.23076e+06	18.28	1.07469e+06
18.29	1.23069e+06	18.29	1.07368e+06
18.3	1.22948e+06	18.3	1.07492e+06
18.31	1.22949e+06	18.31	1.07458e+06
18.32	1.22862e+06	18.32	1.07515e+06
18.33	1.22877e+06	18.33	1.07433e+06
18.34	1.22978e+06	18.34	1.07403e+06
18.35	1.22878e+06	18.35	1.07363e+06
18.36	1.22833e+06	18.36	1.07422e+06
18.37	1.22895e+06	18.37	1.07429e+06
18.38	1.22875e+06	18.38	1.07449e+06
18.39	1.22864e+06	18.39	1.074e+06
18.4	1.22902e+06	18.4	1.07233e+06
18.41	1.22937e+06	18.41	1.07365e+06
18.42	1.22827e+06	18.42	1.0732e+06
18.43	1.22809e+06	18.43	1.07204e+06
18.44	1.23012e+06	18.44	1.07352e+06
18.45	1.2284e+06	18.45	1.07286e+06
18.46	1.22922e+06	18.46	1.07325e+06
18.47	1.22808e+06	18.47	1.07268e+06
18.48	1.22885e+06	18.48	1.07493e+06
18.49	1.22916e+06	18.49	1.07434e+06
18.5	1.23052e+06	18.5	1.07485e+06
18.51	1.23098e+06	18.51	1.07431e+06
18.52	1.23011e+06	18.52	1.07451e+06
18.53	1.23046e+06	18.53	1.07375e+06
18.54	1.22944e+06	18.54	1.07418e+06
18.55	1.22983e+06	18.55	1.074e+06
18.56	1.23016e+06	18.56	1.07293e+06
18.57	1.23109e+06	18.57	1.07549e+06
18.58	1.23069e+06	18.58	1.07451e+06
18.59	1.23054e+06	18.59	1.07406e+06
18.6	1.23134e+06	18.6	1.07479e+06
18.61	1.23167e+06	18.61	1.07513e+06
18.62	1.23317e+06	18.62	1.07449e+06
18.63	1.23325e+06	18.63	1.07486e+06
18.64	1.23398e+06	18.64	1.0755e+06
18.65	1.23471e+06	18.65	1.07732e+06
18.66	1.23485e+06	18.66	1.07729e+06
18.67	1.23441e+06	18.67	1.07705e+06
18.68	1.23251e+06	18.68	1.07749e+06
18.69	1.23172e+06	18.69	1.0774e+06
18.7	1.23096e+06	18.7	1.07787e+06
18.71	1.23089e+06	18.71	1.07716e+06
18.72	1.23065e+06	18.72	1.07539e+06
18.73	1.22877e+06	18.73	1.07677e+06
18.74	1.23002e+06	18.74	1.07549e+06
18.75	1.22958e+06	18.75	1.07469e+06
18.76	1.22996e+06	18.76	1.07424e+06
18.77	1.22973e+06	18.77	1.07357e+06
18.78	1.22825e+06	18.78	1.07405e+06
18.79	1.23031e+06	18.79	1.07357e+06
18.8	1.22831e+06	18.8	1.07438e+06
18.81	1.22918e+06	18.81	1.07493e+06
18.82	1.22988e+06	18.82	1.07245e+06
18.83	1.22964e+06	18.83	1.07333e+06
18.84	1.22927e+06	18.84	1.07331e+06
18.85	1.22942e+06	18.85	1.07192e+06
18.86	1.22914e+06	18.86	1.07553e+06
18.87	1.22991e+06	18.87	1.07351e+06
18.88	1.22948e+06	18.88	1.07251e+06
18.89	1.22964e+06	18.89	1.07126e+06
18.9	1.22849e+06	18.9	1.07258e+06
18.91	1.22844e+06	18.91	1.07422e+06
18.92	1.22874e+06	18.92	1.07525e+06
18.93	1.22903e+06	18.93	1.07423e+06
18.94	1.22955e+06	18.94	1.07437e+06
18.95	1.22899e+06	18.95	1.07396e+06
18.96	1.22964e+06	18.96	1.07487e+06
18.97	1.22957e+06	18.97	1.0722e+06
18.98	1.22881e+06	18.98	1.07386e+06
18.99	1.22846e+06	18.99	1.07494e+06
19	1.22921e+06	19	1.07367e+06
19.01	1.22925e+06	19.01	1.07439e+06
19.02	1.22852e+06	19.02	1.07325e+06
19.03	1.22982e+06	19.03	1.07406e+06
19.04	1.22973e+06	19.04	1.07214e+06
19.05	1.23049e+06	19.05	1.07404e+06
19.06	1.22945e+06	19.06	1.07474e+06
19.07	1.22809e+06	19.07	1.07484e+06
19.08	1.22892e+06	19.08	1.07314e+06
19.09	1.22908e+06	19.09	1.07482e+06
19.1	1.22937e+06	19.1	1.07571e+06
19.11	1.2294e+06	19.11	1.0731e+06
19.12	1.22949e+06	19.12	1.07479e+06
19.13	1.22862e+06	19.13	1.07383e+06
19.14	1.23077e+06	19.14	1.07414e+06
19.15	1.23047e+06	19.15	1.07386e+06
19.16	1.23076e+06	19.16	1.07401e+06
19.17	1.22978e+06	19.17	1.07515e+06
19.18	1.22959e+06	19.18	1.07432e+06
19.19	1.23111e+06	19.19	1.07378e+06
19.2	1.22877e+06	19.2	1.07412e+06
19.21	1.22864e+06	19.21	1.07521e+06
19.22	1.22959e+06	19.22	1.07417e+06
19.23	1.23076e+06	19.23	1.07443e+06
19.24	1.23014e+06	19.24	1.07404e+06
19.25	1.23061e+06	19.25	1.07374e+06
19.26	1.22939e+06	19.26	1.07361e+06
19.27	1.22969e+06	19.27	1.07378e+06
19.28	1.22948e+06	19.28	1.07308e+06
19.29	1.23003e+06	19.29	1.07453e+06
19.3	1.22945e+06	19.3	1.07315e+06
19.31	1.22987e+06	19.31	1.0734e+06
19.32	1.22837e+06	19.32	1.07335e+06
19.33	1.22976e+06	19.33	1.07363e+06
19.34	1.23042e+06	19.34	1.07381e+06
19.35	1.23106e+06	19.35	1.07534e+06
19.36	1.2308e+06	19.36	1.07533e+06
19.37	1.22764e+06	19.37	1.07467e+06
19.38	1.23024e+06	19.38	1.07535e+06
19.39	1.22984e+06	19.39	1.07356e+06
19.4	1.23005e+06	19.4	1.07466e+06
19.41	1.2303e+06	19.41	1.07376e+06
19.42	1.23035e+06	19.42	1.07436e+06
19.43	1.22996e+06	19.43	1.07309e+06
19.44	1.23027e+06	19.44	1.0745e+06
19.45	1.22947e+06	19.45	1.07539e+06
19.46	1.23095e+06	19.46	1.0744e+06
19.47	1.23014e+06	19.47	1.07512e+06
19.48	1.23102e+06	19.48	1.07352e+06
19.49	1.22999e+06	19.49	1.07481e+06
19.5	1.231e+06	19.5	1.07547e+06
19.51	1.22893e+06	19.51	1.0743e+06
19.52	1.2288e+06	19.52	1.07492e+06
19.53	1.22942e+06	19.53	1.07344e+06
19.54	1.22994e+06	19.54	1.07416e+06
19.55	1.23143e+06	19.55	1.07455e+06
19.56	1.22969e+06	19.56	1.07361e+06
19.57	1.23061e+06	19.57	1.07343e+06
19.58	1.22874e+06	19.58	1.0742e+06
19.59	1.2304e+06	19.59	1.07331e+06
19.6	1.22944e+06	19.6	1.07447e+06
19.61	1.23013e+06	19.61	1.07455e+06
19.62	1.22932e+06	19.62	1.07504e+06
19.63	1.22968e+06	19.63	1.0747e+06
19.64	1.23078e+06	19.64	1.07424e+06
19.65	1.23006e+06	19.65	1.07396e+06
19.66	1.22992e+06	19.66	1.07462e+06
19.67	1.2301e+06	19.67	1.07472e+06
19.68	1.23023e+06	19.68	1.07409e+06
19.69	1.23103e+06	19.69	1.07538e+06
19.7	1.23155e+06	19.7	1.07538e+06
19.71	1.23027e+06	19.71	1.07474e+06
19.72	1.23105e+06	19.72	1.07562e+06
19.73	1.23165e+06	19.73	1.07454e+06
19.74	1.2311e+06	19.74	1.07409e+06
19.75	1.23076e+06	19.75	1.07656e+06
19.76	1.23105e+06	19.76	1.07687e+06
19.77	1.23169e+06	19.77	1.07602e+06
19.78	1.23202e+06	19.78	1.07555e+06
19.79	1.23113e+06	19.79	1.07691e+06
19.8	1.23163e+06	19.8	1.07689e+06
19.81	1.23155e+06	19.81	1.07515e+06
19.82	1.23045e+06	19.82	1.07448e+06
19.83	1.23034e+06	19.83	1.07571e+06
19.84	1.23015e+06	19.84	1.07538e+06
19.85	1.2305e+06	19.85	1.07487e+06
19.86	1.2315e+06	19.86	1.07524e+06
19.87	1.23188e+06	19.87	1.074e+06
19.88	1.23123e+06	19.88	1.07493e+06
19.89	1.23061e+06	19.89	1.07429e+06
19.9	1.23091e+06	19.9	1.07359e+06
19.91	1.23025e+06	19.91	1.07475e+06
19.92	1.23047e+06	19.92	1.07329e+06
19.93	1.23043e+06	19.93	1.07306e+06
19.94	1.22915e+06	19.94	1.07338e+06
19.95	1.22966e+06	19.95	1.07454e+06
19.96	1.22967e+06	19.96	1.07535e+06
19.97	1.23009e+06	19.97	1.07486e+06
19.98	1.22915e+06	19.98	1.07298e+06
19.99	1.23073e+06	19.99	1.07431e+06
20	1.2306e+06	20	1.07503e+06
20.01	1.23101e+06	20.01	1.07264e+06
20.02	1.22928e+06	20.02	1.07356e+06
20.03	1.23125e+06	20.03	1.07533e+06
20.04	1.23042e+06	20.04	1.0748e+06
20.05	1.22937e+06	20.05	1.07549e+06
20.06	1.23125e+06	20.06	1.0733e+06
20.07	1.22992e+06	20.07	1.07362e+06
20.08	1.23107e+06	20.08	1.07452e+06
20.09	1.23007e+06	20.09	1.07465e+06
20.1	1.22997e+06	20.1	1.07309e+06
20.11	1.23099e+06	20.11	1.0739e+06
20.12	1.22955e+06	20.12	1.07334e+06
20.13	1.23069e+06	20.13	1.07482e+06
20.14	1.23096e+06	20.14	1.07451e+06
20.15	1.22939e+06	20.15	1.07362e+06
20.16	1.23123e+06	20.16	1.07454e+06
20.17	1.23094e+06	20.17	1.07482e+06
20.18	1.23017e+06	20.18	1.07476e+06
20.19	1.2309e+06	20.19	1.07405e+06
20.2	1.23213e+06	20.2	1.07403e+06
20.21	1.23217e+06	20.21	1.07551e+06
20.22	1.23466e+06	20.22	1.07516e+06
20.23	1.23222e+06	20.23	1.07645e+06
20.24	1.23248e+06	20.24	1.07478e+06
20.25	1.23231e+06	20.25	1.0762e+06
20.26	1.23267e+06	20.26	1.07591e+06
20.27	1.23331e+06	20.27	1.07637e+06
20.28	1.23231e+06	20.28	1.07732e+06
20.29	1.23236e+06	20.29	1.07664e+06
20.3	1.23118e+06	20.3	1.07666e+06
20.31	1.23073e+06	20.31	1.07716e+06
20.32	1.2309e+06	20.32	1.07668e+06
20.33	1.23046e+06	20.33	1.07631e+06
20.34	1.23026e+06	20.34	1.07656e+06
20.35	1.23156e+06	20.35	1.076e+06
20.36	1.23087e+06	20.36	1.07693e+06
20.37	1.23056e+06	20.37	1.07544e+06
20.38	1.23117e+06	20.38	1.07548e+06
20.39	1.23152e+06	20.39	1.07435e+06
20.4	1.22969e+06	20.4	1.07503e+06
20.41	1.23106e+06	20.41	1.07443e+06
20.42	1.231e+06	20.42	1.07358e+06
20.43	1.23059e+06	20.43	1.07353e+06
20.44	1.23285e+06	20.44	1.0754e+06
20.45	1.2307e+06	20.45	1.07447e+06
20.46	1.22955e+06	20.46	1.07432e+06
20.47	1.22972e+06	20.47	1.07433e+06
20.48	1.23065e+06	20.48	1.07552e+06
20.49	1.2301e+06	20.49	1.07382e+06
20.5	1.23153e+06	20.5	1.07454e+06
20.51	1.23329e+06	20.51	1.07507e+06
20.52	1.23142e+06	20.52	1.07403e+06
20.53	1.23049e+06	20.53	1.07429e+06
20.54	1.23028e+06	20.54	1.07412e+06
20.55	1.23116e+06	20.55	1.07579e+06
20.56	1.23021e+06	20.56	1.07404e+06
20.57	1.2303e+06	20.57	1.07338e+06
20.58	1.23031e+06	20.58	1.07385e+06
20.59	1.23003e+06	20.59	1.07424e+06
20.6	1.2309e+06	20.6	1.07396e+06
20.61	1.23058e+06	20.61	1.07383e+06
20.62	1.2297e+06	20.62	1.0741e+06
20.63	1.23114e+06	20.63	1.07329e+06
20.64	1.23135e+06	20.64	1.07239e+06
20.65	1.23016e+06	20.65	1.0743e+06
20.66	1.23075e+06	20.66	1.07545e+06
20.67	1.23029e+06	20.67	1.07482e+06
20.68	1.23049e+06	20.68	1.07426e+06
20.69	1.22946e+06	20.69	1.07513e+06
20.7	1.22948e+06	20.7	1.07419e+06
20.71	1.23021e+06	20.71	1.07342e+06
20.72	1.23072e+06	20.72	1.07498e+06
20.73	1.23022e+06	20.73	1.07614e+06
20.74	1.23116e+06	20.74	1.07652e+06
20.75	1.23242e+06	20.75	1.07432e+06
20.76	1.23184e+06	20.76	1.0733e+06
20.77	1.23207e+06	20.77	1.07368e+06
20.78	1.23169e+06	20.78	1.07571e+06
20.79	1.23049e+06	20.79	1.07475e+06
20.8	1.23133e+06	20.8	1.07556e+06
20.81	1.23333e+06	20.81	1.0757e+06
20.82	1.23391e+06	20.82	1.07709e+06
20.83	1.23352e+06	20.83	1.07491e+06
20.84	1.23513e+06	20.84	1.07515e+06
20.85	1.23549e+06	20.85	1.07675e+06
20.86	1.23663e+06	20.86	1.07719e+06
20.87	1.23819e+06	20.87	1.07829e+06
20.88	1.2381e+06	20.88	1.07769e+06
20.89	1.23837e+06	20.89	1.07856e+06
20.9	1.23823e+06	20.9	1.08052e+06
20.91	1.2375e+06	20.91	1.08042e+06
20.92	1.23736e+06	20.92	1.08111e+06
20.93	1.23625e+06	20.93	1.08141e+06
20.94	1.23671e+06	20.94	1.07884e+06
20.95	1.23549e+06	20.95	1.07894e+06
20.96	1.23449e+06	20.96	1.07856e+06
20.97	1.23416e+06	20.97	1.08005e+06
20.98	1.23342e+06	20.98	1.07803e+06
20.99	1.23247e+06	20.99	1.07712e+06
21	1.23167e+06	21	1.07719e+06
21.01	1.23187e+06	21.01	1.07571e+06
21.02	1.23147e+06	21.02	1.07673e+06
21.03	1.23262e+06	21.03	1.07533e+06
21.04	1.23365e+06	21.04	1.07547e+06
21.05	1.2346e+06	21.05	1.0762e+06
21.06	1.23415e+06	21.06	1.07633e+06
21.07	1.23404e+06	21.07	1.07703e+06
21.08	1.23363e+06	21.08	1.07619e+06
21.09	1.23265e+06	21.09	1.07628e+06
21.1	1.23349e+06	21.1	1.07564e+06
21.11	1.23234e+06	21.11	1.07754e+06
21.12	1.23323e+06	21.12	1.0769e+06
21.13	1.23439e+06	21.13	1.078e+06
21.14	1.23395e+06	21.14	1.07731e+06
21.15	1.23315e+06	21.15	1.07691e+06
21.16	1.2332e+06	21.16	1.07718e+06
21.17	1.23377e+06	21.17	1.07804e+06
21.18	1.23371e+06	21.18	1.07856e+06
21.19	1.23412e+06	21.19	1.07714e+06
21.2	1.23322e+06	21.2	1.07708e+06
21.21	1.23485e+06	21.21	1.07751e+06
21.22	1.2346e+06	21.22	1.0783e+06
21.23	1.23384e+06	21.23	1.07803e+06
21.24	1.23448e+06	21.24	1.07842e+06
21.25	1.2349e+06	21.25	1.07796e+06
21.26	1.23404e+06	21.26	1.07905e+06
21.27	1.23307e+06	21.27	1.07766e+06
21.28	1.23305e+06	21.28	1.07935e+06
21.29	1.23306e+06	21.29	1.07843e+06
21.3	1.23292e+06	21.3	1.07926e+06
21.31	1.23375e+06	21.31	1.07754e+06
21.32	1.23369e+06	21.32	1.0785e+06
21.33	1.23338e+06	21.33	1.07679e+06
21.34	1.23373e+06	21.34	1.07772e+06
21.35	1.23165e+06	21.35	1.07702e+06
21.36	1.23242e+06	21.36	1.07616e+06
21.37	1.23075e+06	21.37	1.07478e+06
21.38	1.23231e+06	21.38	1.07504e+06
21.39	1.23205e+06	21.39	1.07415e+06
21.4	1.23265e+06	21.4	1.07632e+06
21.41	1.23133e+06	21.41	1.07479e+06
21.42	1.23093e+06	21.42	1.0755e+06
21.43	1.23173e+06	21.43	1.07523e+06
21.44	1.23123e+06	21.44	1.07513e+06
21.45	1.23148e+06	21.45	1.07489e+06
21.46	1.23181e+06	21.46	1.0752e+06
21.47	1.23242e+06	21.47	1.0733e+06
21.48	1.2316e+06	21.48	1.07526e+06
21.49	1.23208e+06	21.49	1.07411e+06
21.5	1.23116e+06	21.5	1.07525e+06
21.51	1.23107e+06	21.51	1.07435e+06
21.52	1.23105e+06	21.52	1.07511e+06
21.53	1.23128e+06	21.53	1.07516e+06
21.54	1.23077e+06	21.54	1.07534e+06
21.55	1.23184e+06	21.55	1.07519e+06
21.56	1.23199e+06	21.56	1.07429e+06
21.57	1.23229e+06	21.57	1.07485e+06
21.58	1.23234e+06	21.58	1.07421e+06
21.59	1.23144e+06	21.59	1.07507e+06
21.6	1.23119e+06	21.6	1.07552e+06
21.61	1.23309e+06	21.61	1.07591e+06
21.62	1.23087e+06	21.62	1.07592e+06
21.63	1.23235e+06	21.63	1.07526e+06
21.64	1.23388e+06	21.64	1.07624e+06
21.65	1.2313e+06	21.65	1.07489e+06
21.66	1.23181e+06	21.66	1.07691e+06
21.67	1.23211e+06	21.67	1.07481e+06
21.68	1.23321e+06	21.68	1.07462e+06
21.69	1.23407e+06	21.69	1.07646e+06
21.7	1.23394e+06	21.7	1.07568e+06
21.71	1.23406e+06	21.71	1.07579e+06
21.72	1.23415e+06	21.72	1.07586e+06
21.73	1.23449e+06	21.73	1.07647e+06
21.74	1.23549e+06	21.74	1.07774e+06
21.75	1.23492e+06	21.75	1.07686e+06
21.76	1.23679e+06	21.76	1.07748e+06
21.77	1.23836e+06	21.77	1.07799e+06
21.78	1.24092e+06	21.78	1.07753e+06
21.79	1.24105e+06	21.79	1.07949e+06
21.8	1.24457e+06	21.8	1.08044e+06
21.81	1.24866e+06	21.81	1.0822e+06
21.82	1.24914e+06	21.82	1.08464e+06
21.83	1.24892e+06	21.83	1.08728e+06
21.84	1.24988e+06	21.84	1.08789e+06
21.85	1.24995e+06	21.85	1.09143e+06
21.86	1.24951e+06	21.86	1.09351e+06
21.87	1.245e+06	21.87	1.09473e+06
21.88	1.24364e+06	21.88	1.09392e+06
21.89	1.24259e+06	21.89	1.09254e+06
21.9	1.24178e+06	21.9	1.08798e+06
21.91	1.23963e+06	21.91	1.08785e+06
21.92	1.23885e+06	21.92	1.08646e+06
21.93	1.23594e+06	21.93	1.08518e+06
21.94	1.23422e+06	21.94	1.08319e+06
21.95	1.23363e+06	21.95	1.08108e+06
21.96	1.23389e+06	21.96	1.07923e+06
21.97	1.2336e+06	21.97	1.0777e+06
[truncated: 4,803 more rows]

## Sheet: FIGURE 3(a)
FIGURE 3(a)
2 Theta (degree)	Intensity (a.u.)	2 Theta (degree)	Intensity (a.u.)	2 Theta (degree)	Intensity (a.u.)	2 Theta (degree)	Intensity (a.u.)
15	886.872	15	981.792	610.599	15	15	885.091
15.01	334.889	15.01	2101.9	576.95	15.01	15.01	2466.73
15.02	1898.76	15.02	1155.63	1543.67	15.02	15.02	1300.68
15.03	1468.63	15.03	847.872	963.431	15.03	15.03	2266.47
15.04	818.41	15.04	1585.84	1052.65	15.04	15.04	1518.03
15.05	1255.82	15.05	942.036	410.526	15.05	15.05	1389.16
15.06	1180.04	15.06	1523.1	938.937	15.06	15.06	1524.69
15.07	533.118	15.07	945.444	159.678	15.07	15.07	2604.76
15.08	1254.57	15.08	1604.37	1249.07	15.08	15.08	850.558
15.09	1356.15	15.09	746.436	700.706	15.09	15.09	1839.53
15.1	1148.69	15.1	103.793	1267.17	15.1	15.1	1850.28
15.11	704.714	15.11	518.282	545.047	15.11	15.11	2030.57
15.12	2365.89	15.12	936.374	-202.474	15.12	15.12	1547.59
15.13	845.934	15.13	1410.85	1132.09	15.13	15.13	872.851
15.14	2012.94	15.14	1264.11	1096.44	15.14	15.14	-36.5417
15.15	1218.09	15.15	894.547	-227.321	15.15	15.15	1859.8
15.16	55.7986	15.16	399.902	493.916	15.16	15.16	569.149
15.17	51.3937	15.17	236.832	2105.34	15.17	15.17	-140.663
15.18	1066.28	15.18	1003.29	962.432	15.18	15.18	1642.49
15.19	997.783	15.19	1061.87	265.726	15.19	15.19	1096.85
15.2	776.962	15.2	1436.41	260.664	15.2	15.2	2730.24
15.21	1067.69	15.21	1494.92	-5.52857	15.21	15.21	2894.37
15.22	435.007	15.22	1098.93	395.826	15.22	15.22	557.352
15.23	696.442	15.23	967.551	404.008	15.23	15.23	1364.18
15.24	989.049	15.24	758.244	1183.94	15.24	15.24	2101.79
15.25	804.911	15.25	822.316	959.291	15.25	15.25	1609.67
15.26	1061.07	15.26	1168.07	22.6129	15.26	15.26	48.2205
15.27	1540.83	15.27	987.098	419.797	15.27	15.27	1127.51
15.28	1716.23	15.28	955.724	362.126	15.28	15.28	2258.86
15.29	788.994	15.29	874.94	-127.748	15.29	15.29	1743.95
15.3	1071.74	15.3	1237.13	263.686	15.3	15.3	2318.17
15.31	477.779	15.31	1392.02	-514.338	15.31	15.31	1005.8
15.32	1056.47	15.32	924.073	135.872	15.32	15.32	1485.02
15.33	1294.28	15.33	1611.02	8.79803	15.33	15.33	1608.29
15.34	2087.89	15.34	202.908	894.875	15.34	15.34	1916.49
15.35	950.166	15.35	839.532	712.996	15.35	15.35	-392.249
15.36	1756.8	15.36	1860.04	828.111	15.36	15.36	2025.39
15.37	1467.08	15.37	308.301	-123.212	15.37	15.37	1399.01
15.38	630.343	15.38	1198.02	-510.137	15.38	15.38	32.3514
15.39	372.234	15.39	2315.28	-422.616	15.39	15.39	1444.62
15.4	773.509	15.4	1874.27	34.5518	15.4	15.4	532.383
15.41	128.076	15.41	1095.52	1295.74	15.41	15.41	1905.05
15.42	139.56	15.42	1055.72	82.5059	15.42	15.42	1047.36
15.43	1252.14	15.43	735.895	759.969	15.43	15.43	2662.81
15.44	982.114	15.44	734.743	1212.99	15.44	15.44	1613.2
15.45	2319.85	15.45	634.752	1202.87	15.45	15.45	813.711
15.46	90.4362	15.46	918.766	2021.23	15.46	15.46	-184.062
15.47	-193.228	15.47	198.483	856.514	15.47	15.47	986.877
15.48	1259.21	15.48	1462.52	98.2734	15.48	15.48	1506.95
15.49	1875.29	15.49	965.797	154.678	15.49	15.49	648.986
15.5	319.662	15.5	1795.24	269.667	15.5	15.5	1002.68
15.51	2599.96	15.51	1556.98	1065.72	15.51	15.51	1004.98
15.52	125.947	15.52	1301.51	979.855	15.52	15.52	1786.77
15.53	839.183	15.53	864.133	988.193	15.53	15.53	1367.32
15.54	242.404	15.54	989.979	-432.464	15.54	15.54	1969.08
15.55	1025.97	15.55	1231.33	41.5217	15.55	15.55	1284.68
15.56	471.533	15.56	1465.64	421.375	15.56	15.56	2158.45
15.57	-88.2545	15.57	318.781	427.508	15.57	15.57	997.401
15.58	80.132	15.58	1182.95	577.204	15.58	15.58	1246.92
15.59	637.942	15.59	922.127	305.586	15.59	15.59	507.592
15.6	592.644	15.6	1654.01	1084.88	15.6	15.6	172.658
15.61	1438.29	15.61	1368.03	153.964	15.61	15.61	1611.72
15.62	513.987	15.62	1488.59	-169.945	15.62	15.62	2061.99
15.63	400.163	15.63	722.104	185.239	15.63	15.63	2349.91
15.64	-57.5674	15.64	983.923	595.893	15.64	15.64	2017.25
15.65	1075.35	15.65	320.362	967.315	15.65	15.65	1833.62
15.66	1022.36	15.66	783.809	-359.52	15.66	15.66	2340.79
15.67	1572.45	15.67	1805.59	73.1401	15.67	15.67	1523.45
15.68	485.858	15.68	615.02	-22.4507	15.68	15.68	1188.14
15.69	1073.37	15.69	907.91	515.113	15.69	15.69	951.715
15.7	765.192	15.7	1195.57	1490.39	15.7	15.7	2535.57
15.71	-329.387	15.71	1859.64	799.861	15.71	15.71	1089.81
15.72	988.078	15.72	1573.81	532.086	15.72	15.72	781.647
15.73	919.398	15.73	1519.71	204.689	15.73	15.73	1919.49
15.74	362.999	15.74	3071.6	11.4094	15.74	15.74	1149.7
15.75	-41.5575	15.75	1172.11	729.517	15.75	15.75	1029.79
15.76	-188.614	15.76	1548.6	770.357	15.76	15.76	1394.05
15.77	643.148	15.77	1515.88	449.721	15.77	15.77	1322.92
15.78	502.911	15.78	1831.36	540.461	15.78	15.78	914.933
15.79	1553.08	15.79	431.506	209.029	15.79	15.79	1177.67
15.8	1369.01	15.8	730.969	537.547	15.8	15.8	1586.02
15.81	518.66	15.81	456.851	1088.57	15.81	15.81	2103.2
15.82	342.105	15.82	298.114	542.602	15.82	15.82	1299.78
15.83	-179.362	15.83	1494.42	-25.2507	15.83	15.83	623.581
15.84	832.764	15.84	136.161	1786.55	15.84	15.84	410.637
15.85	-534.985	15.85	486.681	1008.25	15.85	15.85	1210.84
15.86	1761.48	15.86	1475.91	921.706	15.86	15.86	620.688
15.87	548.268	15.87	923.754	1439.57	15.87	15.87	1764.87
15.88	843.755	15.88	51.6931	1465.47	15.88	15.88	2200.92
15.89	814.615	15.89	787.744	652.592	15.89	15.89	1087.92
15.9	919.271	15.9	102.659	82.306	15.9	15.9	1462.61
15.91	548.858	15.91	368.924	482.934	15.91	15.91	1943.85
15.92	1445.76	15.92	435.938	461.994	15.92	15.92	1252.95
15.93	1293.54	15.93	1631.58	274.528	15.93	15.93	1718.86
15.94	1378.58	15.94	209.312	285.036	15.94	15.94	1725.95
15.95	855.138	15.95	-535.184	1049.49	15.95	15.95	1913.07
15.96	-40.7431	15.96	1425.26	223.355	15.96	15.96	2640.28
15.97	-1275.45	15.97	932.338	176.026	15.97	15.97	3339.27
15.98	200.499	15.98	956.51	-262.423	15.98	15.98	2133.95
15.99	778.797	15.99	1400.93	540.909	15.99	15.99	1998.11
16	793.03	16	1229.79	208.628	16	16	2900.1
16.01	907.003	16.01	769.496	1489.62	16.01	16.01	1084.28
16.02	496.173	16.02	1348.95	474.388	16.02	16.02	-355.982
16.03	1194.05	16.03	783.216	510.98	16.03	16.03	2011.34
16.04	554.951	16.04	1295.96	1186.91	16.04	16.04	1362.38
16.05	-123.755	16.05	1635.23	342.47	16.05	16.05	1685.94
16.06	502.252	16.06	807.341	1050.83	16.06	16.06	894.075
16.07	1876.7	16.07	202.37	1308.17	16.07	16.07	929.73
16.08	709.919	16.08	1356.35	336.1	16.08	16.08	817.215
16.09	1679	16.09	587.655	322.828	16.09	16.09	2056.42
16.1	1113.55	16.1	1313.85	-66.7889	16.1	16.1	1494.49
16.11	382.614	16.11	878.623	1269.54	16.11	16.11	470.546
16.12	362.179	16.12	147.832	1540.31	16.12	16.12	1066.06
16.13	249.843	16.13	-841.974	667.839	16.13	16.13	1546.6
16.14	892.249	16.14	1027.46	-205.58	16.14	16.14	2365.52
16.15	1017.82	16.15	1923.92	4.45057	16.15	16.15	2734.41
16.16	1123.54	16.16	1626.66	97.5139	16.16	16.16	1947.52
16.17	909.388	16.17	1647.51	-760.503	16.17	16.17	360.947
16.18	272.256	16.18	1658.41	222.89	16.18	16.18	2339.86
16.19	629.982	16.19	1219.91	1308.66	16.19	16.19	2448.66
16.2	209.924	16.2	-106.888	516.131	16.2	16.2	1585.92
16.21	-715.758	16.21	1182.65	1095.41	16.21	16.21	869.344
16.22	640.535	16.22	598.225	565.897	16.22	16.22	1283.81
16.23	701.194	16.23	342.938	29.5854	16.23	16.23	1158.2
16.24	299.7	16.24	59.2684	422.19	16.24	16.24	2125.9
16.25	1890.37	16.25	1225.53	799.342	16.25	16.25	1995.06
16.26	342.694	16.26	2192.27	369.479	16.26	16.26	474.737
16.27	983.443	16.27	1416.15	990.546	16.27	16.27	1728.91
16.28	313.331	16.28	1247.28	559.114	16.28	16.28	1559.12
16.29	528.664	16.29	1385.94	459.544	16.29	16.29	3329.32
16.3	589.524	16.3	1229.92	1371.73	16.3	16.3	736.406
16.31	1633.29	16.31	1252.48	801.345	16.31	16.31	1841.74
16.32	204.402	16.32	1288.31	1594.35	16.32	16.32	1786.68
16.33	1266.5	16.33	1982.56	1310.37	16.33	16.33	669.557
16.34	502.477	16.34	1535.85	-119.071	16.34	16.34	1694.55
16.35	-11.8288	16.35	-42.7186	760.746	16.35	16.35	1885.55
16.36	554.91	16.36	251.568	293.266	16.36	16.36	2901.49
16.37	327.984	16.37	1392.6	833.361	16.37	16.37	1096.93
16.38	-896.202	16.38	470.704	273.911	16.38	16.38	922.223
16.39	1385.05	16.39	1503.94	-193.981	16.39	16.39	817.221
16.4	66.984	16.4	1625.88	730.503	16.4	16.4	2565.61
16.41	-628.562	16.41	850.457	607.837	16.41	16.41	2556.36
16.42	1.09462	16.42	1723.31	1086.93	16.42	16.42	94.9748
16.43	514.511	16.43	1622.42	1038.63	16.43	16.43	1437.13
16.44	700.801	16.44	1922.65	11.9345	16.44	16.44	2512.07
16.45	-335.311	16.45	1542.17	1237.23	16.45	16.45	1535.96
16.46	293.583	16.46	718.969	26.3133	16.46	16.46	76.2167
16.47	45.8405	16.47	780.98	1280.38	16.47	16.47	1212.66
16.48	384.104	16.48	1495.1	348.672	16.48	16.48	574.79
16.49	438.187	16.49	1108.68	526.559	16.49	16.49	973.447
16.5	-396.988	16.5	1504.42	215.131	16.5	16.5	3004.7
16.51	539.114	16.51	874.952	432.162	16.51	16.51	906.376
16.52	601.303	16.52	1694.85	1381.28	16.52	16.52	1283.7
16.53	-445.581	16.53	67.594	1678.4	16.53	16.53	904.721
16.54	-430.886	16.54	1315.65	2136.42	16.54	16.54	2176.6
16.55	-188.563	16.55	1668.51	637.732	16.55	16.55	2059.65
16.56	729.065	16.56	1233.44	1079.6	16.56	16.56	2522.78
16.57	1143.82	16.57	1090.76	1531.78	16.57	16.57	2542
16.58	427.697	16.58	488.857	1511.81	16.58	16.58	1059.41
16.59	1470.54	16.59	1472.34	440.64	16.59	16.59	833.156
16.6	792.771	16.6	1857.26	897.056	16.6	16.6	1000.7
16.61	232.418	16.61	699.089	1739.68	16.61	16.61	623.937
16.62	192.123	16.62	1344.78	716.617	16.62	16.62	1306.03
16.63	1508.12	16.63	1122.73	-184.652	16.63	16.63	654.685
16.64	1103.43	16.64	402.629	1300.35	16.64	16.64	383.885
16.65	1113.87	16.65	484.698	309.531	16.65	16.65	1784.08
16.66	922.727	16.66	403.701	-211.608	16.66	16.66	2278.51
16.67	619.222	16.67	1946.7	557.035	16.67	16.67	2777.61
16.68	637.804	16.68	2934.52	1531.77	16.68	16.68	2697.63
16.69	554.7	16.69	894.705	677.029	16.69	16.69	247.361
16.7	812.032	16.7	1060.38	710.769	16.7	16.7	2016.95
16.71	464.26	16.71	1427.14	1300.35	16.71	16.71	2442.14
16.72	748.408	16.72	1562.09	1802.84	16.72	16.72	2530.43
16.73	131.303	16.73	208.866	685.043	16.73	16.73	2454.12
16.74	278.154	16.74	914.929	1105.61	16.74	16.74	1898.96
16.75	248.8	16.75	1077.58	1015.55	16.75	16.75	645.926
16.76	845.591	16.76	2375.23	598.862	16.76	16.76	86.9303
16.77	13.4146	16.77	1971.2	565.91	16.77	16.77	1379
16.78	-601.18	16.78	927.98	1267.11	16.78	16.78	139.247
16.79	1237.13	16.79	606.869	-161.801	16.79	16.79	477.719
16.8	1051.17	16.8	-259.873	581.529	16.8	16.8	1508.78
16.81	-281.007	16.81	1834.48	70.9433	16.81	16.81	1279.9
16.82	-227.113	16.82	1408.36	389.534	16.82	16.82	2012.78
16.83	71.4008	16.83	1665.83	744.417	16.83	16.83	2121.5
16.84	1156.8	16.84	815.775	1264.02	16.84	16.84	1741.39
16.85	846.742	16.85	880.263	930.046	16.85	16.85	1717.38
16.86	-74.6142	16.86	1407.88	1085.68	16.86	16.86	1848.04
16.87	2010.11	16.87	940.731	-360.257	16.87	16.87	1752.69
16.88	793.071	16.88	2035.15	-395.934	16.88	16.88	1955.05
16.89	-146.537	16.89	2127.75	111.127	16.89	16.89	3105.46
16.9	744.03	16.9	2114.31	435.73	16.9	16.9	1952.99
16.91	1186.91	16.91	1795.06	-544.77	16.91	16.91	981.285
16.92	767.542	16.92	1609.03	75.2601	16.92	16.92	363.328
16.93	1269.68	16.93	1897.99	-145.778	16.93	16.93	1366.97
16.94	952.033	16.94	1108.52	457.94	16.94	16.94	2162.73
16.95	1983.49	16.95	52.7464	205.086	16.95	16.95	1681.16
16.96	896.512	16.96	1733.03	239.628	16.96	16.96	2442.36
16.97	392.62	16.97	121.329	804.322	16.97	16.97	1293.48
16.98	332.159	16.98	1607.33	1164.21	16.98	16.98	862.053
16.99	1714.83	16.99	2074.53	70.388	16.99	16.99	347.681
17	314.411	17	1652.77	90.3398	17	17	2527.71
17.01	628.26	17.01	870.629	865.806	17.01	17.01	2551.93
17.02	2049.46	17.02	411.612	1571.31	17.02	17.02	2439.06
17.03	1509.74	17.03	424.564	139.987	17.03	17.03	2140.07
17.04	104.517	17.04	733.362	891.251	17.04	17.04	1465.24
17.05	600.394	17.05	1794.19	1331.54	17.05	17.05	646.38
17.06	538.038	17.06	1818.26	1976.42	17.06	17.06	2483.8
17.07	297.896	17.07	2053.31	1268.75	17.07	17.07	2173.82
17.08	574.961	17.08	1416.77	389.27	17.08	17.08	520.053
17.09	453.937	17.09	1117.58	784.193	17.09	17.09	-335.563
17.1	769.254	17.1	1109.32	1192.26	17.1	17.1	-193.852
17.11	1348.02	17.11	398.545	278.69	17.11	17.11	2789.76
17.12	924.983	17.12	1802.14	2131.67	17.12	17.12	1610.86
17.13	584.102	17.13	-132.359	10.644	17.13	17.13	-250.918
17.14	1250.92	17.14	465.316	97.894	17.14	17.14	1402.43
17.15	849.531	17.15	1252.55	1284.92	17.15	17.15	306.281
17.16	-176.197	17.16	1843.04	759.162	17.16	17.16	322.872
17.17	-44.9034	17.17	1925.04	916.877	17.17	17.17	2193.7
17.18	299.352	17.18	984.742	931.145	17.18	17.18	948.765
17.19	970.089	17.19	979.028	984.788	17.19	17.19	-348.989
17.2	596.035	17.2	734.571	701.771	17.2	17.2	800.671
17.21	619.779	17.21	2007.79	210.415	17.21	17.21	1681.24
17.22	2395.71	17.22	1575.34	357.173	17.22	17.22	623.042
17.23	955.622	17.23	1449.58	-86.8953	17.23	17.23	864.028
17.24	-382.915	17.24	1481.33	815.908	17.24	17.24	1346.86
17.25	275.107	17.25	673.482	533.998	17.25	17.25	1212.78
17.26	911.68	17.26	1315.78	1103.04	17.26	17.26	2990.24
17.27	1470.19	17.27	1841.71	1985.23	17.27	17.27	1524.86
17.28	1928.38	17.28	1922.7	1149.32	17.28	17.28	1893.62
17.29	2362.62	17.29	762.68	454.326	17.29	17.29	263.05
17.3	2475.09	17.3	635.257	465.202	17.3	17.3	1366.33
17.31	213.353	17.31	1700.72	-428.472	17.31	17.31	903.136
17.32	1543.34	17.32	1457.45	1185.68	17.32	17.32	2732.11
17.33	539.463	17.33	1941.53	644.488	17.33	17.33	3063.37
17.34	878.406	17.34	1078.03	1022.43	17.34	17.34	775.103
17.35	916.239	17.35	1069.03	1881.86	17.35	17.35	543.8
17.36	687.946	17.36	702.055	1445.57	17.36	17.36	514.805
17.37	1920.51	17.37	342.846	1959.13	17.37	17.37	628.782
17.38	1315.94	17.38	902.728	1684.58	17.38	17.38	1574.46
17.39	1756.79	17.39	220.794	2676.89	17.39	17.39	1780.33
17.4	1366.66	17.4	1264.57	1601.19	17.4	17.4	2677.37
17.41	1271.64	17.41	2281.61	2243.54	17.41	17.41	763.75
17.42	580.269	17.42	834.175	1042.49	17.42	17.42	59.8196
17.43	791.292	17.43	1271.15	-235.405	17.43	17.43	2736.95
17.44	1538.97	17.44	1522.18	1268.45	17.44	17.44	549.841
17.45	1214.78	17.45	2302.8	1381.93	17.45	17.45	635.95
17.46	-18.2844	17.46	1192.47	183.275	17.46	17.46	667.274
17.47	1364.5	17.47	1640.87	828.194	17.47	17.47	1681.51
17.48	1264.27	17.48	1127.6	1686.98	17.48	17.48	2841.83
17.49	867.66	17.49	1865.32	957.19	17.49	17.49	2131.65
17.5	234.979	17.5	1102.84	-699.284	17.5	17.5	479.042
17.51	3116.32	17.51	119.571	689.736	17.51	17.51	190.776
17.52	1200.82	17.52	1338.69	1210.97	17.52	17.52	2039.92
17.53	552.229	17.53	-159.6	288.836	17.53	17.53	2038.55
17.54	919.763	17.54	543.102	1138.44	17.54	17.54	303.068
17.55	1132.24	17.55	2247.67	661.757	17.55	17.55	2201.14
17.56	1460.95	17.56	1522.1	395.436	17.56	17.56	1218.84
17.57	721.329	17.57	1986.28	824.118	17.57	17.57	1576.29
17.58	1005.61	17.58	-241.662	2147.39	17.58	17.58	1317.64
17.59	961.745	17.59	554.766	1020.07	17.59	17.59	1263.45
17.6	1016.58	17.6	1167.78	851.969	17.6	17.6	831.058
17.61	263.561	17.61	-47.9234	1189.09	17.61	17.61	1738.25
17.62	-496.213	17.62	1245.76	1065.23	17.62	17.62	98.244
17.63	921.578	17.63	933.589	374.51	17.63	17.63	2067.76
17.64	1039.16	17.64	1675.11	1130.78	17.64	17.64	1921.85
17.65	520.679	17.65	1474.87	800.5	17.65	17.65	3225.77
17.66	1029.85	17.66	490.011	1307.36	17.66	17.66	1368.42
17.67	833.406	17.67	1067.19	1490.52	17.67	17.67	794.61
17.68	1933.26	17.68	1065.98	972.628	17.68	17.68	2176.96
17.69	731.078	17.69	1207.13	704.949	17.69	17.69	1271.11
17.7	-60.7082	17.7	193.111	765.477	17.7	17.7	3037.24
17.71	404.625	17.71	854.019	479.348	17.71	17.71	2876.54
17.72	549.018	17.72	941.587	405.368	17.72	17.72	849.795
17.73	1788.36	17.73	434.851	1125.33	17.73	17.73	603.043
17.74	125.273	17.74	494.408	1374.89	17.74	17.74	303.517
17.75	618.481	17.75	1112.94	548.062	17.75	17.75	680.232
17.76	823.43	17.76	623.639	741.793	17.76	17.76	2076.54
17.77	1278.95	17.77	1485.07	497.738	17.77	17.77	1566.36
17.78	114.53	17.78	2322.12	1846.97	17.78	17.78	371.646
17.79	1747.7	17.79	2081.17	1155.1	17.79	17.79	229.574
17.8	2360.52	17.8	570.962	910.77	17.8	17.8	1257.59
17.81	1271.54	17.81	1645.09	2045.95	17.81	17.81	1351.55
17.82	778.633	17.82	900.349	1373.07	17.82	17.82	1001.25
17.83	322.886	17.83	1068.8	461.117	17.83	17.83	855.128
17.84	1036.53	17.84	1792.51	1137.17	17.84	17.84	731.953
17.85	-213.632	17.85	1449.03	926.561	17.85	17.85	3020.42
17.86	1163.87	17.86	2105.57	537.955	17.86	17.86	1547.41
17.87	719.274	17.87	1281.95	1435.72	17.87	17.87	1265
17.88	1816.82	17.88	1098.14	1146.85	17.88	17.88	1020.72
17.89	1021.71	17.89	913.956	1080.66	17.89	17.89	1584.71
17.9	1502.05	17.9	429.714	770.802	17.9	17.9	2632.05
17.91	166.174	17.91	799.863	1362.83	17.91	17.91	978.826
17.92	384.665	17.92	1356.42	1791.03	17.92	17.92	461.748
17.93	1300.73	17.93	1983.55	1276.54	17.93	17.93	-416.622
17.94	930.934	17.94	1719.09	-367.831	17.94	17.94	1034.24
17.95	71.8172	17.95	1731.24	557.475	17.95	17.95	787.846
17.96	298.15	17.96	1268.46	1108.04	17.96	17.96	2084.64
17.97	1122.86	17.97	615.179	1084.15	17.97	17.97	1691.64
17.98	709.5	17.98	1725.14	1719.94	17.98	17.98	708.787
17.99	1011.52	17.99	2143.1	625.092	17.99	17.99	2233.06
18	467.273	18	1372.03	1799.6	18	18	2622.38
18.01	1307.9	18.01	1694.25	398.459	18.01	18.01	1621.78
18.02	669.098	18.02	1954.48	779.573	18.02	18.02	1931.46
18.03	1421.75	18.03	1303.95	1894.66	18.03	18.03	2217.41
18.04	1413.13	18.04	464.099	760.14	18.04	18.04	1135.05
18.05	806.801	18.05	452.032	741.362	18.05	18.05	1871.13
18.06	331.655	18.06	1211.56	942.078	18.06	18.06	1471.62
18.07	1067.06	18.07	2132.26	651.242	18.07	18.07	901.648
18.08	1364.39	18.08	70.6306	2092.83	18.08	18.08	174.017
18.09	1537.27	18.09	1429.98	1008.65	18.09	18.09	34.0941
18.1	93.8254	18.1	1587.75	1950.57	18.1	18.1	1916.24
18.11	896.652	18.11	873.136	-78.4882	18.11	18.11	2312.22
18.12	1549.13	18.12	936.501	2092.7	18.12	18.12	1417.54
18.13	845.366	18.13	2466.25	1469.08	18.13	18.13	-421.437
18.14	1718.79	18.14	1000.83	1553.19	18.14	18.14	24.6043
18.15	1347.78	18.15	1069.12	1233.77	18.15	18.15	2079.16
18.16	491.805	18.16	242.909	-264.719	18.16	18.16	1141.95
18.17	1411.97	18.17	1288.24	1218.46	18.17	18.17	308.117
18.18	265.489	18.18	2364.6	1014.48	18.18	18.18	1438.9
18.19	1453.55	18.19	801.707	996.308	18.19	18.19	617.325
18.2	537.565	18.2	1685.66	932.507	18.2	18.2	851.517
18.21	410.506	18.21	1257.96	699.262	18.21	18.21	-486.795
18.22	-558.399	18.22	1219.45	503.28	18.22	18.22	-608.143
18.23	217.445	18.23	1208.84	1262.63	18.23	18.23	1465.21
18.24	680.66	18.24	1781.34	820.24	18.24	18.24	3142.53
18.25	1826.84	18.25	1682.27	853.07	18.25	18.25	2326.18
18.26	825.857	18.26	597.631	21.202	18.26	18.26	328.097
18.27	338.105	18.27	540.29	647.485	18.27	18.27	986.32
18.28	456.592	18.28	499.528	676.216	18.28	18.28	2123.42
18.29	829.982	18.29	195.687	1781.41	18.29	18.29	1046.55
18.3	1425.72	18.3	1037.22	1032.54	18.3	18.3	1506.83
18.31	1766.37	18.31	2719.63	699.213	18.31	18.31	2415.11
18.32	748.027	18.32	1591.03	576.743	18.32	18.32	1445.57
18.33	1069.32	18.33	1391.51	999.846	18.33	18.33	-614.327
18.34	1629.56	18.34	949.272	404.124	18.34	18.34	1376.45
18.35	1711.65	18.35	903.578	1326.15	18.35	18.35	500.507
18.36	1462.11	18.36	716.266	1057.88	18.36	18.36	246.243
18.37	1581.28	18.37	1499.91	1112.02	18.37	18.37	920.405
18.38	78.8512	18.38	374.071	1043.96	18.38	18.38	481.125
18.39	584.891	18.39	892.821	1264.11	18.39	18.39	1701.99
18.4	1556.33	18.4	2060.94	1731	18.4	18.4	622.13
18.41	900.824	18.41	-328.625	1144.84	18.41	18.41	1881.5
18.42	1823.43	18.42	1323.72	2505.31	18.42	18.42	1776.37
18.43	626.709	18.43	1437.29	1841.13	18.43	18.43	1731.8
18.44	390.897	18.44	157.012	1417.69	18.44	18.44	705.202
18.45	938.971	18.45	983.193	1533.45	18.45	18.45	793.569
18.46	1367.92	18.46	1209.14	2067.77	18.46	18.46	1001.39
18.47	672.326	18.47	2427.26	269.66	18.47	18.47	1873.48
18.48	669.496	18.48	374.966	1078.69	18.48	18.48	2446.85
18.49	545.216	18.49	1908.03	1497.61	18.49	18.49	183.036
18.5	1239.36	18.5	1222.97	887.35	18.5	18.5	383.197
18.51	53.9406	18.51	707.539	1713.97	18.51	18.51	1316.32
18.52	1327.82	18.52	565.992	866.778	18.52	18.52	881.526
18.53	555.536	18.53	834.113	1913.79	18.53	18.53	-112.246
18.54	1295.55	18.54	982.922	1483.28	18.54	18.54	-339.132
18.55	1607.05	18.55	1105.85	715.069	18.55	18.55	1369.74
18.56	964.386	18.56	1510.52	1330.88	18.56	18.56	1556.99
18.57	1583.91	18.57	1166.15	1055.47	18.57	18.57	-176.391
18.58	2299.37	18.58	2014.73	957.355	18.58	18.58	634.854
18.59	1309.55	18.59	1903.66	1760.28	18.59	18.59	1204.97
18.6	1560.04	18.6	1222.61	1739.97	18.6	18.6	1601.53
18.61	2059.82	18.61	1051.63	1353.8	18.61	18.61	841.338
18.62	672.954	18.62	1094.52	1206.8	18.62	18.62	2057.36
18.63	2108.11	18.63	1631.75	1349.57	18.63	18.63	767.819
18.64	1692.53	18.64	1113.42	2205.97	18.64	18.64	671.951
18.65	1069.16	18.65	1323.92	1731.34	18.65	18.65	732.082
18.66	684.575	18.66	774.949	2288.9	18.66	18.66	395.368
18.67	594.746	18.67	1817.16	2338.73	18.67	18.67	1407.17
18.68	1650.58	18.68	900.422	1629.5	18.68	18.68	1978.97
18.69	917.119	18.69	1655.51	1025.46	18.69	18.69	1115.08
18.7	186.05	18.7	1535.69	1930.73	18.7	18.7	861.277
18.71	1103.71	18.71	1317.47	635.79	18.71	18.71	73.2547
18.72	255.66	18.72	2481.43	1648.19	18.72	18.72	560.251
18.73	2042.1	18.73	1654.72	2482.42	18.73	18.73	2064.49
18.74	1986.23	18.74	1433.88	2359.38	18.74	18.74	1606.36
18.75	2208.03	18.75	1367.76	2029.6	18.75	18.75	870.001
18.76	3011.48	18.76	651.278	1467.21	18.76	18.76	948.469
18.77	1646.47	18.77	2730.04	907.933	18.77	18.77	1785.73
18.78	1833.43	18.78	2233.11	1434.62	18.78	18.78	1339.67
18.79	2099.77	18.79	2398.55	2069.49	18.79	18.79	1095.73
18.8	1711.55	18.8	1970.72	2381.43	18.8	18.8	1977.4
18.81	1288.09	18.81	1630.03	2340.7	18.81	18.81	1815.01
18.82	2132.85	18.82	2461.59	2024.24	18.82	18.82	1514.65
18.83	1808.79	18.83	2818.06	2657.77	18.83	18.83	1904.84
18.84	2248.29	18.84	1656.8	3094.82	18.84	18.84	3612.52
18.85	2185.06	18.85	2537.14	2673.36	18.85	18.85	3593.96
18.86	2409.63	18.86	3657.63	2900.08	18.86	18.86	3804.13
18.87	3502.39	18.87	2378.37	2184.76	18.87	18.87	3127.44
18.88	2808.6	18.88	4228.62	4990.53	18.88	18.88	2987.39
18.89	2219.47	18.89	4482.44	4788.25	18.89	18.89	2681.58
18.9	3492.7	18.9	3964.49	4904.45	18.9	18.9	3872.81
18.91	3237.25	18.91	3797.65	3638.6	18.91	18.91	5086.41
18.92	3805.05	18.92	4048.14	3995.89	18.92	18.92	4293.17
18.93	3476.08	18.93	5084.27	6266.52	18.93	18.93	4954.09
18.94	3334.36	18.94	4451.06	6601.75	18.94	18.94	6267.25
18.95	3686.17	18.95	6497.87	5334.32	18.95	18.95	9125.81
18.96	3799.79	18.96	6635.76	5500.57	18.96	18.96	9726.29
18.97	3846.81	18.97	6548.62	6914.69	18.97	18.97	10523.6
18.98	3576.34	18.98	6780.7	5935.05	18.98	18.98	12446.2
18.99	4293.68	18.99	7318.84	6265.43	18.99	18.99	12216.1
19	4849.3	19	6998.77	6360.65	19	19	13391
19.01	5016.25	19.01	7698.71	5824.29	19.01	19.01	14078.1
19.02	5572.23	19.02	7145.42	5862.56	19.02	19.02	13793.4
19.03	5034.21	19.03	7403.39	5494.79	19.03	19.03	11473.7
19.04	7119.81	19.04	5925.94	5192.64	19.04	19.04	10052.2
19.05	5447.99	19.05	5210.08	4644.89	19.05	19.05	10297.2
19.06	5868.22	19.06	5099.56	2914.66	19.06	19.06	9181.49
19.07	5826.17	19.07	3597.88	3545.52	19.07	19.07	7010.65
19.08	5300.96	19.08	5042.76	3175.03	19.08	19.08	5949.23
19.09	5490.89	19.09	3162.56	1999.14	19.09	19.09	5890.49
19.1	5560.63	19.1	3594.05	1997.23	19.1	19.1	6107.88
19.11	5402.9	19.11	3667.16	2303.61	19.11	19.11	4540.63
19.12	3948.19	19.12	3370.62	2608.03	19.12	19.12	2805.39
19.13	3217.6	19.13	1766.54	1401.61	19.13	19.13	2159.76
19.14	4463.9	19.14	3229.03	1976.45	19.14	19.14	607.837
19.15	4086.79	19.15	2070.29	2550.35	19.15	19.15	1294.13
19.16	3065.14	19.16	2565.33	855.532	19.16	19.16	2985.83
19.17	1952.97	19.17	1611.64	1471.81	19.17	19.17	1721.68
19.18	4697.83	19.18	1087.61	903.984	19.18	19.18	2036.16
19.19	2594.46	19.19	1529.11	1754.3	19.19	19.19	621.766
19.2	2864.16	19.2	655.162	777.651	19.2	19.2	678.456
19.21	2601.52	19.21	1908.78	1355.51	19.21	19.21	1412.41
19.22	2838.55	19.22	774.834	728.707	19.22	19.22	594.084
19.23	2598.76	19.23	2084.54	1012.63	19.23	19.23	423.408
19.24	2009.43	19.24	1592.01	1290.53	19.24	19.24	795.824
19.25	1674.04	19.25	2133.44	3149.55	19.25	19.25	759.52
19.26	1771.66	19.26	778.061	1937.95	19.26	19.26	1553.7
19.27	3062.29	19.27	2073.65	2394.03	19.27	19.27	1593.61
19.28	1449.04	19.28	1845.75	2304.38	19.28	19.28	259.097
19.29	1984.37	19.29	1007.08	834.283	19.29	19.29	252.656
19.3	1367.62	19.3	1695.89	1814.26	19.3	19.3	-941.753
19.31	2339.96	19.31	1343.08	1441.84	19.31	19.31	298.984
19.32	1215.17	19.32	1993.58	794.479	19.32	19.32	735.336
19.33	1022.42	19.33	1477.46	-383.032	19.33	19.33	622.554
19.34	1954.92	19.34	1172.78	990.675	19.34	19.34	2617.8
19.35	2870.78	19.35	564.149	1288.29	19.35	19.35	874.773
19.36	1291.18	19.36	1175.6	1462.88	19.36	19.36	1902.33
19.37	1209.71	19.37	1023.99	-359.182	19.37	19.37	-215.143
19.38	400.591	19.38	847.334	1206.11	19.38	19.38	470.942
19.39	225.446	19.39	1091	1232.72	19.39	19.39	945.412
19.4	1513.42	19.4	1041.3	1494.51	19.4	19.4	1665.27
19.41	1409.98	19.41	565.936	2144.36	19.41	19.41	1496.84
19.42	825.797	19.42	958.039	1931.55	19.42	19.42	1458.84
19.43	1376.73	19.43	432.216	1041.97	19.43	19.43	807.431
19.44	1038.06	19.44	1119.47	1488.13	19.44	19.44	1521.12
19.45	2182.61	19.45	1321.47	924.415	19.45	19.45	609.949
19.46	1618.39	19.46	377.413	782.038	19.46	19.46	1584.41
19.47	1531.18	19.47	1379.69	1950.65	19.47	19.47	508.567
19.48	3108.72	19.48	973.195	1186.58	19.48	19.48	761.774
19.49	524.507	19.49	1975.29	897.236	19.49	19.49	3084.82
19.5	4.08845	19.5	1655.81	1468.36	19.5	19.5	1353.63
19.51	501.522	19.51	1308.25	908.396	19.51	19.51	1348.72
19.52	1372.38	19.52	1567.34	1183.94	19.52	19.52	1264.88
19.53	1315.52	19.53	1754.15	1133.23	19.53	19.53	991.98
19.54	-283.779	19.54	1105.22	1192.93	19.54	19.54	441.356
19.55	960.236	19.55	1095.89	-134.675	19.55	19.55	141.308
19.56	1148.27	19.56	-88.1949	1362.09	19.56	19.56	555.459
19.57	1569.03	19.57	845.51	-78.9318	19.57	19.57	-280.618
19.58	1259.4	19.58	1406.82	576.282	19.58	19.58	819.478
19.59	1355.87	19.59	1792.36	890.701	19.59	19.59	-801.254
19.6	1507.89	19.6	1242.29	1395.01	19.6	19.6	1021.47
19.61	1163.07	19.61	1147.55	546.467	19.61	19.61	1657.44
19.62	1926.47	19.62	1538.67	869.266	19.62	19.62	771.874
19.63	1929.47	19.63	261.994	1406.14	19.63	19.63	1676.65
19.64	1708.68	19.64	1348.08	2044.95	19.64	19.64	1558.88
19.65	592.21	19.65	930.621	2039.81	19.65	19.65	2027.27
19.66	2001.2	19.66	1176.5	763.285	19.66	19.66	449.673
19.67	2659.25	19.67	400.886	64.6051	19.67	19.67	924.234
19.68	952.86	19.68	697.152	1133.62	19.68	19.68	-20.0257
19.69	1250.54	19.69	803.826	1051.12	19.69	19.69	60.5251
19.7	-81.206	19.7	1609.68	1039.72	19.7	19.7	735.91
19.71	566.13	19.71	1699.28	1590.79	19.71	19.71	355.589
19.72	1816.14	19.72	781.715	1126.63	19.72	19.72	2823.19
19.73	1261.09	19.73	1583.55	713.706	19.73	19.73	967.387
19.74	941.63	19.74	1549.57	1045.71	19.74	19.74	1627.91
19.75	1064.4	19.75	1386.67	1146.9	19.75	19.75	551.474
19.76	2317.26	19.76	1734.56	-64.9136	19.76	19.76	2134.55
19.77	924.093	19.77	1356.31	-19.7195	19.77	19.77	646.196
19.78	1240.47	19.78	1187.1	50.3966	19.78	19.78	-127.648
19.79	949.441	19.79	394.176	239.966	19.79	19.79	722.057
19.8	1135.13	19.8	789.215	871.182	19.8	19.8	900.977
19.81	1185.39	19.81	597.028	1126.39	19.81	19.81	881.355
19.82	1940.86	19.82	2114.23	1235.53	19.82	19.82	1690.23
19.83	1474.03	19.83	1273.77	1373.24	19.83	19.83	1986.36
19.84	1502.56	19.84	1941.26	1766.75	19.84	19.84	653.161
19.85	135.936	19.85	653.316	133.371	19.85	19.85	1673.35
19.86	1067.99	19.86	1449.34	314.418	19.86	19.86	289.136
19.87	1334.16	19.87	1253.97	1070.61	19.87	19.87	1324.38
19.88	1024.09	19.88	108.074	810.317	19.88	19.88	1504.57
19.89	2547.4	19.89	1411.54	630.928	19.89	19.89	1352.08
19.9	1622.13	19.9	2582.8	286.806	19.9	19.9	3188.17
19.91	1644.25	19.91	921.661	1334.75	19.91	19.91	1423.98
19.92	620.781	19.92	1252.81	1555.08	19.92	19.92	1688.25
19.93	1483.93	19.93	959.247	823.889	19.93	19.93	1613.73
19.94	-140.005	19.94	1715.92	847.101	19.94	19.94	598.381
19.95	716.914	19.95	1697.69	601.761	19.95	19.95	2121.57
19.96	813.231	19.96	496.48	-437.983	19.96	19.96	1853.4
19.97	1316.65	19.97	1376.33	881.274	19.97	19.97	837.303
19.98	1087.16	19.98	846.593	1107.6	19.98	19.98	2003.13
19.99	717.076	19.99	640.787	-551.977	19.99	19.99	1728.92
20	799.266	20	737.22	1358.12	20	20	1194.53
20.01	1745.46	20.01	1537.24	1384.37	20.01	20.01	1828.55
20.02	1044.72	20.02	1234.39	1858.34	20.02	20.02	1294.75
20.03	1392.18	20.03	954.557	1818.17	20.03	20.03	2510.37
20.04	1385.36	20.04	1459.92	1445.47	20.04	20.04	-370.996
20.05	1493.75	20.05	664.956	1427.69	20.05	20.05	2905.43
20.06	2321.88	20.06	259.163	1255.54	20.06	20.06	333.095
20.07	1387.22	20.07	379.652	1679.41	20.07	20.07	1571.22
20.08	623.345	20.08	1300.62	1110.63	20.08	20.08	1018.67
20.09	967.814	20.09	677.19	-345.892	20.09	20.09	2389.67
20.1	-191.406	20.1	1261.19	790.012	20.1	20.1	2820.38
20.11	1004.74	20.11	1000	425.551	20.11	20.11	301.562
20.12	617.752	20.12	1139.98	1101.51	20.12	20.12	1615.89
20.13	1487.6	20.13	1149.76	-10.115	20.13	20.13	833.839
20.14	1743.66	20.14	870.489	310.831	20.14	20.14	39.4586
20.15	3232.74	20.15	1175.99	909.303	20.15	20.15	1924.64
20.16	684.264	20.16	1787.29	783.046	20.16	20.16	2146.97
20.17	1396.19	20.17	1441.33	275.782	20.17	20.17	1961.17
20.18	2787.98	20.18	1766.61	460.739	20.18	20.18	2605.71
20.19	2172.06	20.19	854.085	1805.88	20.19	20.19	3045.9
20.2	2635.51	20.2	2312.96	618.513	20.2	20.2	1500.17
20.21	1163.5	20.21	1156.28	1645.25	20.21	20.21	1789.72
20.22	1732.53	20.22	1569.41	2446.05	20.22	20.22	697.974
20.23	903.358	20.23	138.119	599.773	20.23	20.23	1120.9
20.24	2381.85	20.24	1701.03	-157.823	20.24	20.24	2977.01
20.25	983.502	20.25	1041.88	1752.28	20.25	20.25	1397.47
20.26	956.405	20.26	873.89	1098.11	20.26	20.26	907.9
20.27	1063.12	20.27	1314.36	2274.37	20.27	20.27	1451.54
20.28	1833.95	20.28	2858.63	1121.37	20.28	20.28	1882.53
20.29	506.008	20.29	1665.27	1339.75	20.29	20.29	809.406
20.3	2076.16	20.3	788.503	1272.13	20.3	20.3	2903.39
20.31	1922.68	20.31	1632.13	924.611	20.31	20.31	1756.29
20.32	1863.15	20.32	894.817	1096.01	20.32	20.32	1411.78
20.33	1349.61	20.33	1270.73	1365.93	20.33	20.33	559.279
20.34	1835.6	20.34	2026.67	-27.9066	20.34	20.34	1125.17
20.35	2073.02	20.35	2031.71	1513.87	20.35	20.35	2157.02
20.36	1799.16	20.36	1493.32	-96.1847	20.36	20.36	1855.19
20.37	2102.42	20.37	458.96	1930.39	20.37	20.37	1987.75
20.38	1458.6	20.38	592.535	1066.4	20.38	20.38	854.088
20.39	527.527	20.39	1343.83	924.45	20.39	20.39	1975.01
20.4	708.17	20.4	2010.7	722.426	20.4	20.4	1623.64
20.41	1339.05	20.41	865.106	984.974	20.41	20.41	850.933
20.42	1474.31	20.42	824.394	432.774	20.42	20.42	1214.29
20.43	600.289	20.43	1832.62	922.23	20.43	20.43	784.098
20.44	192.082	20.44	461.659	868.096	20.44	20.44	913.334
20.45	2428.66	20.45	1337.77	1221.22	20.45	20.45	702.86
20.46	1415.98	20.46	1506.32	-349.221	20.46	20.46	1534.47
20.47	580.269	20.47	438.39	1033.39	20.47	20.47	2973.45
20.48	1511.47	20.48	1524.84	390.928	20.48	20.48	2186.25
20.49	1545.48	20.49	1504.54	461.218	20.49	20.49	1039.87
20.5	1157.04	20.5	1407.42	820.089	20.5	20.5	3189.67
20.51	1854.18	20.51	1401.24	2108.14	20.51	20.51	1322.06
20.52	1534.84	20.52	1252.02	621.189	20.52	20.52	2026.84
20.53	1048.46	20.53	2195.98	1184.25	20.53	20.53	2387.56
20.54	1035.58	20.54	1563.01	727.592	20.54	20.54	1324.4
20.55	1775.9	20.55	2141.16	1170.77	20.55	20.55	2909.22
20.56	1608.14	20.56	2355.49	661.284	20.56	20.56	1207.64
20.57	1024.65	20.57	1641.18	1411.35	20.57	20.57	292.658
20.58	680.823	20.58	1665.59	646.941	20.58	20.58	725.416
20.59	1040.67	20.59	1755.93	198.399	20.59	20.59	1758.56
20.6	2131.94	20.6	2001.44	221.931	20.6	20.6	1920.2
20.61	1539.93	20.61	1359.58	351.202	20.61	20.61	1590.36
20.62	2075.02	20.62	1108.18	1507.12	20.62	20.62	1091.48
20.63	1750.58	20.63	523.605	1098.5	20.63	20.63	1482.97
20.64	1989.22	20.64	140.517	2330.16	20.64	20.64	1608.01
20.65	1148.86	20.65	918.089	654.158	20.65	20.65	1394.65
20.66	1036.91	20.66	1231.08	759.458	20.66	20.66	2422.34
20.67	1610.19	20.67	9.62793	509.093	20.67	20.67	1398.85
20.68	2349.56	20.68	695.306	1958.33	20.68	20.68	2994.6
20.69	965.984	20.69	2106.54	912.921	20.69	20.69	1037.97
20.7	1957.57	20.7	1020.71	631.587	20.7	20.7	926.936
20.71	-342.352	20.71	1280.12	845.711	20.71	20.71	1246.34
20.72	995.368	20.72	746.228	1515.74	20.72	20.72	1314.94
20.73	794.368	20.73	1015.97	1295.35	20.73	20.73	1114.26
20.74	949.81	20.74	2728.02	834.116	20.74	20.74	1957.04
20.75	1867.46	20.75	1114.29	781.681	20.75	20.75	915.56
20.76	2731.21	20.76	1726.89	854.009	20.76	20.76	-256.88
20.77	965.154	20.77	-273.692	811.619	20.77	20.77	711.447
20.78	1329.48	20.78	1636.46	387.075	20.78	20.78	1588.96
20.79	851.402	20.79	1020.65	915.949	20.79	20.79	2208.07
20.8	1471.56	20.8	586.692	947.472	20.8	20.8	1754.33
20.81	1769.02	20.81	495.873	546.252	20.81	20.81	1468.47
20.82	-371.338	20.82	874.532	1072.62	20.82	20.82	1396.57
20.83	576.873	20.83	2372.74	711.538	20.83	20.83	2160.86
20.84	131.084	20.84	543.678	-157.137	20.84	20.84	1845.21
20.85	-358.269	20.85	32.4488	1025.31	20.85	20.85	909.465
20.86	1107.96	20.86	704.051	734.055	20.86	20.86	786.846
20.87	1236.68	20.87	312.962	526.278	20.87	20.87	1183.48
20.88	1350.31	20.88	1639.26	1028.69	20.88	20.88	1627.77
20.89	1724.93	20.89	1185.77	690.048	20.89	20.89	2184.69
20.9	2095.94	20.9	1292.61	380.77	20.9	20.9	1913.95
20.91	1162.73	20.91	272.126	1177.48	20.91	20.91	1495
20.92	1579.8	20.92	752.049	863.687	20.92	20.92	2058.01
20.93	1791.95	20.93	1013.94	-88.0058	20.93	20.93	2596.78
20.94	634.13	20.94	574.73	-3.90418	20.94	20.94	1038.12
20.95	856.167	20.95	269.604	112.323	20.95	20.95	2386.65
20.96	1257.77	20.96	472.011	543.879	20.96	20.96	1150.57
20.97	-726.381	20.97	747.269	982.346	20.97	20.97	399.244
20.98	1539.5	20.98	1273.8	299.087	20.98	20.98	1140.66
20.99	2411.19	20.99	910.712	366.33	20.99	20.99	2758.02
21	1517.86	21	1563.94	1112.49	21	21	1349.38
21.01	1418.27	21.01	2330.1	1047.48	21.01	21.01	1356.74
21.02	263.509	21.02	2366.89	846.835	21.02	21.02	1513.97
21.03	2150.82	21.03	45.9143	1157.74	21.03	21.03	429.203
21.04	1716.33	21.04	1252.47	1423.52	21.04	21.04	632.983
21.05	1053.77	21.05	1449.67	262.369	21.05	21.05	1675.7
21.06	1717.21	21.06	891.988	352.909	21.06	21.06	414.941
21.07	2311.57	21.07	1224.23	-1365.54	21.07	21.07	2107.98
21.08	1197.93	21.08	2342.07	-270.609	21.08	21.08	2759.21
21.09	1405.17	21.09	527.753	248.144	21.09	21.09	1877.07
21.1	1044.61	21.1	1025.1	565.663	21.1	21.1	1900.18
21.11	1102.83	21.11	355.675	773.238	21.11	21.11	1160.96
21.12	1281.73	21.12	165.748	191.223	21.12	21.12	932.306
21.13	-651.792	21.13	1097.49	225.099	21.13	21.13	641.998
21.14	980.081	21.14	1947.08	55.5799	21.14	21.14	278.145
21.15	1696.94	21.15	566.952	543.099	21.15	21.15	1656.94
21.16	1044.1	21.16	1632.19	933.899	21.16	21.16	1288.11
21.17	181.1	21.17	885.541	715.23	21.17	21.17	2386.48
21.18	1343.59	21.18	1311.81	2172.76	21.18	21.18	3137.53
21.19	1626.76	21.19	987.532	824.538	21.19	21.19	1606
21.2	-166.256	21.2	1676.99	529.56	21.2	21.2	1924.74
21.21	-0.68466	21.21	1450.77	-102.839	21.21	21.21	2338.85
21.22	1972.46	21.22	2497.57	197.417	21.22	21.22	1842.17
21.23	1136.45	21.23	1505.5	508.042	21.23	21.23	1882.14
21.24	532.44	21.24	1488.44	-260.846	21.24	21.24	2561.1
21.25	1337.37	21.25	1849.64	918.112	21.25	21.25	1384.52
21.26	1871.18	21.26	1700.26	482.473	21.26	21.26	472.013
21.27	1628.83	21.27	564.324	1739.64	21.27	21.27	1542.55
21.28	1129.1	21.28	426.428	70.213	21.28	21.28	2397.91
21.29	590.772	21.29	518.857	-771.49	21.29	21.29	1766.04
21.3	308.261	21.3	1286.39	-1374.8	21.3	21.3	1089.61
21.31	474.575	21.31	1518.48	1032.62	21.31	21.31	1630.72
21.32	774.528	21.32	1639.71	807.782	21.32	21.32	750.065
21.33	1542.13	21.33	118.917	-62.4173	21.33	21.33	1469.66
21.34	1138.07	21.34	521.03	-348.014	21.34	21.34	1455.16
21.35	1781.21	21.35	1571.6	49.3589	21.35	21.35	547.194
21.36	1815.3	21.36	1119.91	615.917	21.36	21.36	1377.2
21.37	1097.97	21.37	1331.1	75.7378	21.37	21.37	1459.32
21.38	330.166	21.38	2268.75	1339.93	21.38	21.38	1851.5
21.39	729.598	21.39	1158.59	474.096	21.39	21.39	1051.7
21.4	976.033	21.4	2153.96	1122.88	21.4	21.4	829.711
21.41	1105.93	21.41	1514.5	1056.63	21.41	21.41	942.554
21.42	1922.34	21.42	2210.27	341.457	21.42	21.42	607.145
21.43	644.073	21.43	857.592	-217.261	21.43	21.43	1187.82
21.44	893.083	21.44	2252.79	-269.703	21.44	21.44	2137.21
21.45	751.945	21.45	2374.27	760.3	21.45	21.45	484.419
21.46	264.581	21.46	1719.46	651.015	21.46	21.46	845.859
21.47	1944.45	21.47	1221.5	99.475	21.47	21.47	729.431
21.48	2449.98	21.48	506.578	333.348	21.48	21.48	3282.58
21.49	1443.81	21.49	2327.49	1070.1	21.49	21.49	2593.21
21.5	1335.96	21.5	1899.43	365.769	21.5	21.5	1944.74
21.51	521.874	21.51	1398.83	130.019	21.51	21.51	1472.75
21.52	267.374	21.52	465.479	1222.14	21.52	21.52	616.011
21.53	1035.73	21.53	1185.06	190.35	21.53	21.53	781.552
21.54	960.581	21.54	864.474	-440.806	21.54	21.54	624.138
21.55	2291.4	21.55	1179.19	1114.59	21.55	21.55	1001.78
21.56	1226.24	21.56	2125.51	-21.0679	21.56	21.56	1299.89
21.57	2201.02	21.57	1519.54	924.429	21.57	21.57	2076.79
21.58	1277.27	21.58	1547.18	767.593	21.58	21.58	1127.83
21.59	2241.48	21.59	175.953	315.639	21.59	21.59	1582.47
21.6	1735.29	21.6	68.387	1450.07	21.6	21.6	1595.99
21.61	1044.55	21.61	1181.63	271.097	21.61	21.61	1146.22
21.62	2156.3	21.62	574.169	1121.43	21.62	21.62	2520.81
21.63	988.364	21.63	1673.5	1412.76	21.63	21.63	2092.42
21.64	661.313	21.64	1739.94	467.182	21.64	21.64	857.497
21.65	1048.96	21.65	1390.68	997.882	21.65	21.65	942.488
21.66	1145.44	21.66	725.793	-315.644	21.66	21.66	1465.83
21.67	460.136	21.67	2312.62	891.227	21.67	21.67	1135.53
21.68	1352.16	21.68	199.658	-326.056	21.68	21.68	1197.05
21.69	1505.71	21.69	487.492	-160.262	21.69	21.69	3268.55
21.7	546.597	21.7	629.766	1418.93	21.7	21.7	1640.73
21.71	418.455	21.71	2475.15	576.009	21.71	21.71	1537.4
21.72	968.816	21.72	991.353	878.925	21.72	21.72	2075.56
21.73	992.051	21.73	219.503	554.842	21.73	21.73	1191.96
21.74	283.089	21.74	1672.47	1345.16	21.74	21.74	1435.91
21.75	1528.49	21.75	456.382	-278.02	21.75	21.75	1460.56
21.76	1934.86	21.76	357.081	1463.46	21.76	21.76	599.591
21.77	2646.09	21.77	783.815	788.932	21.77	21.77	1874.39
21.78	131.223	21.78	1276.34	932.925	21.78	21.78	1582.61
21.79	904.608	21.79	570.314	1554.67	21.79	21.79	1706.52
21.8	931.001	21.8	-222.412	315.05	21.8	21.8	1702.05
21.81	581.056	21.81	1346.15	-482.239	21.81	21.81	1487.76
21.82	2242.74	21.82	1394.27	738.854	21.82	21.82	760.96
21.83	1449.11	21.83	736.527	-244.913	21.83	21.83	1621.53
21.84	1562.09	21.84	966.015	-219.663	21.84	21.84	1293.64
21.85	2241.64	21.85	557.059	248.777	21.85	21.85	1833.52
21.86	1303.98	21.86	416.801	1050.9	21.86	21.86	2030.02
21.87	733.514	21.87	-465.945	659.026	21.87	21.87	1045.3
21.88	1304.47	21.88	867.501	974.342	21.88	21.88	2401.72
21.89	920.031	21.89	1448.85	1074.8	21.89	21.89	899.641
21.9	1907.16	21.9	1109.35	1212.02	21.9	21.9	1991.33
21.91	872.833	21.91	1109.16	892.107	21.91	21.91	1685.35
21.92	1594.46	21.92	1340.31	303.6	21.92	21.92	2406.09
21.93	2150.75	21.93	1101.04	70.0805	21.93	21.93	925.625
21.94	219.348	21.94	2233.46	288.14	21.94	21.94	419.444
21.95	1596.16	21.95	923.35	7.82987	21.95	21.95	1111.9
21.96	845.132	21.96	2174.86	208.213	21.96	21.96	725.129
21.97	2046.3	21.97	320.353	1728	21.97	21.97	1966.61
21.98	2271.59	21.98	1885.75	923.495	21.98	21.98	2182.72
21.99	835.961	21.99	2759.72	164.898	21.99	21.99	1496.5
22	1049.3	22	947.105	109.666	22	22	1870.09
22.01	1798.63	22.01	81.8172	93.6368	22.01	22.01	2343.58
22.02	897.067	22.02	1639.78	188.311	22.02	22.02	1419.83
22.03	570.794	22.03	526.376	1099.85	22.03	22.03	1715.76
22.04	873.456	22.04	1132.68	145.601	22.04	22.04	598.734
22.05	1675.33	22.05	1727.46	1036.66	22.05	22.05	793.643
22.06	1053.58	22.06	1326.77	1284.38	22.06	22.06	1412
22.07	482.4	22.07	1489.99	879.73	22.07	22.07	1871.72
22.08	-210.081	22.08	875.885	719.449	22.08	22.08	1539.81
22.09	732.028	22.09	1016.95	310.79	22.09	22.09	1912.29
22.1	927.083	22.1	2680.75	448.423	22.1	22.1	1571.64
22.11	614.147	22.11	1347.19	916.365	22.11	22.11	2408.18
22.12	2901.09	22.12	795.562	452.64	22.12	22.12	3560.96
22.13	1179.32	22.13	1594.38	168.912	22.13	22.13	2793.9
22.14	270.464	22.14	1095.89	957.889	22.14	22.14	2681.23
22.15	307.716	22.15	1701.51	1143.24	22.15	22.15	2067.01
22.16	525.229	22.16	747.697	896.834	22.16	22.16	1227.42
22.17	561.095	22.17	1949.7	722.464	22.17	22.17	1298.31
22.18	1630.53	22.18	1536.3	810.234	22.18	22.18	1068.79
22.19	1158.35	22.19	1140.91	840.074	22.19	22.19	1780.54
22.2	217.711	22.2	1319.55	-503.039	22.2	22.2	1908.46
22.21	1320.44	22.21	1993.26	1546.02	22.21	22.21	1042.48
22.22	847.391	22.22	1586.58	119.554	22.22	22.22	1907.16
22.23	1288.3	22.23	1422.37	826.582	22.23	22.23	1052.65
22.24	998.169	22.24	1237.24	379.319	22.24	22.24	-554.937
22.25	1637.39	22.25	1820.55	1588.7	22.25	22.25	1156.64
22.26	878.754	22.26	1611.21	211.72	22.26	22.26	2372.83
22.27	1128.16	22.27	1781.24	165.202	22.27	22.27	1474.37
22.28	986.855	22.28	675.568	238.838	22.28	22.28	-58.5854
22.29	1872.45	22.29	1926.52	710.123	22.29	22.29	839.261
22.3	792.939	22.3	366.357	229.38	22.3	22.3	1850.97
22.31	1146.13	22.31	1059.93	447.452	22.31	22.31	1531.43
22.32	1525.18	22.32	1817.25	842.387	22.32	22.32	1621.45
22.33	278.719	22.33	1491.06	1325.8	22.33	22.33	2558.63
22.34	994.731	22.34	845.585	225.354	22.34	22.34	1047.71
22.35	2131.11	22.35	359.939	-347.726	22.35	22.35	-239.614
22.36	1253.48	22.36	1444.09	-676.115	22.36	22.36	1681.21
22.37	1774.47	22.37	925.849	58.6009	22.37	22.37	1282.66
22.38	898.6	22.38	817.156	63.2422	22.38	22.38	1063.72
22.39	1607.09	22.39	555.062	-309.135	22.39	22.39	1498.03
22.4	1765.64	22.4	1186.71	494.439	22.4	22.4	1440.96
22.41	852.287	22.41	481.245	451.603	22.41	22.41	1952.55
22.42	2157.78	22.42	1587.76	635.782	22.42	22.42	1307.41
22.43	1580.12	22.43	310.51	612.422	22.43	22.43	1101.37
22.44	1881.52	22.44	1270.67	771.702	22.44	22.44	1622.57
22.45	1292.58	22.45	596.299	-80.7596	22.45	22.45	1723.96
22.46	2319.66	22.46	1537.54	-40.412	22.46	22.46	565.252
22.47	1155.14	22.47	2346.26	19.0966	22.47	22.47	1584.82
22.48	1703.12	22.48	1223.9	219.35	22.48	22.48	1813.72
22.49	2208.55	22.49	1102.83	1120.58	22.49	22.49	655.721
22.5	1605.05	22.5	1825.29	-60.7456	22.5	22.5	204.579
22.51	2504.21	22.51	-77.9877	1323.11	22.51	22.51	1123.69
22.52	1644	22.52	965.143	-29.7669	22.52	22.52	3333.65
22.53	3283.77	22.53	1188.61	1259.43	22.53	22.53	3005.68
22.54	2176.6	22.54	576.179	551.983	22.54	22.54	2802.17
22.55	1248.59	22.55	28.5218	1199.19	22.55	22.55	2489.27
22.56	386.262	22.56	608.521	514.394	22.56	22.56	1480.98
22.57	1609.49	22.57	1780.18	671.884	22.57	22.57	2673.43
22.58	181.073	22.58	590.315	161.418	22.58	22.58	2373.25
22.59	1757.63	22.59	243.459	609.839	22.59	22.59	1028.48
22.6	687.003	22.6	1602.63	1761.95	22.6	22.6	2141.66
22.61	1685.32	22.61	1160.37	972.165	22.61	22.61	1834.38
22.62	848.23	22.62	1403.78	-22.8843	22.62	22.62	1803.29
22.63	2793.25	22.63	1669.14	-78.8355	22.63	22.63	1789.17
22.64	562.874	22.64	1485.56	636.109	22.64	22.64	1094.08
22.65	223.469	22.65	858.912	690.327	22.65	22.65	2124.38
22.66	920.077	22.66	16.1697	852.781	22.66	22.66	923.861
22.67	2240.38	22.67	313.87	669.112	22.67	22.67	2302.58
22.68	1146.54	22.68	1034.79	-179.268	22.68	22.68	1712.18
22.69	364.226	22.69	1145.41	1093.9	22.69	22.69	1696.54
22.7	798.894	22.7	2416.01	381.906	22.7	22.7	2001.08
22.71	1894.74	22.71	1804.82	1345.53	22.71	22.71	245.776
22.72	1591.55	22.72	619.887	1459.33	22.72	22.72	1643.42
22.73	1117.77	22.73	403.373	430.267	22.73	22.73	2454.13
22.74	1660.29	22.74	1160.07	146.513	22.74	22.74	1739.83
22.75	28.2899	22.75	2085.03	-181.55	22.75	22.75	1713.58
22.76	1134.17	22.76	232.357	1241.27	22.76	22.76	680.843
22.77	1000.67	22.77	490	150.672	22.77	22.77	-330.136
22.78	1432.33	22.78	1079.89	-346.926	22.78	22.78	1667.87
22.79	642.266	22.79	1282.07	39.1635	22.79	22.79	2471.1
22.8	2272.02	22.8	1620.39	423.811	22.8	22.8	2240.27
22.81	1929.5	22.81	1157.9	636.587	22.81	22.81	1539.92
22.82	1845.55	22.82	1686.92	503.791	22.82	22.82	2231.42
22.83	1805.35	22.83	1888.76	-129.725	22.83	22.83	2899.61
22.84	3004.32	22.84	-251.132	678.92	22.84	22.84	1827.61
22.85	1391.49	22.85	125.308	1461.4	22.85	22.85	2351.42
22.86	730.594	22.86	2349.96	1086.79	22.86	22.86	940.992
22.87	1466.48	22.87	546.846	1484.44	22.87	22.87	889.606
22.88	700.385	22.88	-519.533	1372.61	22.88	22.88	1396.2
22.89	1235.16	22.89	983.319	350.346	22.89	22.89	1366.16
22.9	902.034	22.9	-19.5021	1342.89	22.9	22.9	3435.71
22.91	1300.38	22.91	989.164	-519.173	22.91	22.91	2758.45
22.92	541.614	22.92	2010.94	-193.594	22.92	22.92	2211.58
22.93	1275.47	22.93	1350.4	1270.2	22.93	22.93	2140.86
22.94	1008.94	22.94	1223.39	1530.06	22.94	22.94	2030.28
22.95	1243.95	22.95	671.541	933.845	22.95	22.95	1015.44
22.96	556.716	22.96	1620.41	193.653	22.96	22.96	-250.995
22.97	1674.05	22.97	1139.24	931.11	22.97	22.97	479.817
22.98	1342.96	22.98	2149.16	413.15	22.98	22.98	949.011
22.99	599.788	22.99	786.682	1547.26	22.99	22.99	1447.22
23	2183.11	23	304.782	390.613	23	23	1702.22
23.01	2000.51	23.01	322.478	856.648	23.01	23.01	1818.44
23.02	402.31	23.02	1474.72	470.316	23.02	23.02	514.644
23.03	144.188	23.03	2092.53	850.739	23.03	23.03	-1013.82
23.04	1342.43	23.04	-12.5094	1384.45	23.04	23.04	535.154
23.05	1004.69	23.05	619.054	3243.98	23.05	23.05	1124.96
23.06	1393.23	23.06	1097.56	1560.17	23.06	23.06	103.363
23.07	1695.75	23.07	2460.39	-488.684	23.07	23.07	1140.42
23.08	1145.88	23.08	1069.88	-158.112	23.08	23.08	537.113
23.09	1912.78	23.09	1415.33	220.521	23.09	23.09	-138.07
23.1	1447.31	23.1	1735.51	1114.74	23.1	23.1	297.958
23.11	908.818	23.11	1611.56	1345.24	23.11	23.11	456.467
23.12	1493.76	23.12	1052.09	988.741	23.12	23.12	850.943
23.13	-572.933	23.13	1200.61	1392.59	23.13	23.13	625.155
23.14	1666.28	23.14	1259.86	251.12	23.14	23.14	811.401
23.15	1832.48	23.15	1350.39	1038.26	23.15	23.15	765.766
23.16	1421.01	23.16	1457.31	648.053	23.16	23.16	2156.72
23.17	2277.43	23.17	248.437	-263.924	23.17	23.17	976.071
23.18	435.378	23.18	1161.08	1260.25	23.18	23.18	1473.04
23.19	1152.15	23.19	1522.73	222.058	23.19	23.19	1372.32
23.2	874.145	23.2	1633.55	961.442	23.2	23.2	1338.3
23.21	1329.06	23.21	761.296	-14.8637	23.21	23.21	1946.79
23.22	989.51	23.22	1612.27	748.147	23.22	23.22	2581.8
23.23	745.135	23.23	1628.62	1097.18	23.23	23.23	2622.87
23.24	786.32	23.24	1561.26	654.074	23.24	23.24	1521.37
23.25	1493.8	23.25	1777.55	2130.18	23.25	23.25	2398.9
23.26	2395.52	23.26	1470.81	103.392	23.26	23.26	415.977
23.27	1304.46	23.27	1001.18	614.384	23.27	23.27	1582.57
23.28	2497.42	23.28	2308.4	543.655	23.28	23.28	1661.4
23.29	772.858	23.29	1549.84	-513.107	23.29	23.29	2272.1
23.3	2077.67	23.3	1121.35	-198.173	23.3	23.3	1448.46
23.31	1264.23	23.31	700.423	1785.88	23.31	23.31	1961.17
23.32	1619.31	23.32	849.874	1418.98	23.32	23.32	2171.05
23.33	1825.08	23.33	2505.85	1016.88	23.33	23.33	2173.7
23.34	1584.1	23.34	2201.7	530.695	23.34	23.34	1941.48
23.35	991.237	23.35	2311.48	1436.47	23.35	23.35	1580.57
23.36	1603.06	23.36	783.908	25.4958	23.36	23.36	1317.33
23.37	483.92	23.37	269.599	864.307	23.37	23.37	2898.19
23.38	418.286	23.38	480.804	692.214	23.38	23.38	1481.5
23.39	663.894	23.39	1749.74	653.434	23.39	23.39	1445
23.4	1082.7	23.4	2063.36	601.672	23.4	23.4	1079.81
23.41	1265.09	23.41	1531.68	1598.63	23.41	23.41	815.849
23.42	1465.65	23.42	1321.51	947.898	23.42	23.42	1510.97
23.43	370.431	23.43	1730.9	1010.18	23.43	23.43	34.6466
23.44	2275.23	23.44	1286.3	470.758	23.44	23.44	558.468
23.45	1604.6	23.45	1586.92	182.493	23.45	23.45	2138.33
23.46	2247	23.46	2417.87	1320.38	23.46	23.46	2006.12
23.47	2154.12	23.47	1326.94	187.882	23.47	23.47	-49.9607
23.48	2578.04	23.48	1403.93	-122.327	23.48	23.48	359.31
23.49	2224.82	23.49	2966.23	-14.6579	23.49	23.49	1339.54
23.5	1253.65	23.5	846.558	1955.49	23.5	23.5	-3.58815
23.51	649.987	23.51	1486.29	817.47	23.51	23.51	-361.72
23.52	-63.4111	23.52	1343.41	790.054	23.52	23.52	1489.75
23.53	-69.0881	23.53	942.28	-511.213	23.53	23.53	948.885
23.54	1259.98	23.54	1665.93	1244.87	23.54	23.54	1774.63
23.55	1658.44	23.55	1879.24	-234.814	23.55	23.55	893.868
23.56	1031.08	23.56	1031.69	915.159	23.56	23.56	860.759
23.57	2319.9	23.57	1600.95	1497.36	23.57	23.57	1872.07
23.58	2737.16	23.58	744.541	1205.17	23.58	23.58	1849.78
23.59	2538.76	23.59	261.821	424.506	23.59	23.59	2611.16
23.6	1511.99	23.6	598.589	927.429	23.6	23.6	1382.04
23.61	2254.02	23.61	1381.17	1038.02	23.61	23.61	1555.88
23.62	1268.54	23.62	775.964	1578.2	23.62	23.62	1538.88
23.63	2498.54	23.63	1585.75	-310.72	23.63	23.63	35.3335
23.64	1660.22	23.64	1014.03	-354.181	23.64	23.64	90.408
23.65	1445.41	23.65	915.417	1322.89	23.65	23.65	1573.73
23.66	1075.2	23.66	-720.816	-163.892	23.66	23.66	2031.36
23.67	1237.29	23.67	1323.3	300.241	23.67	23.67	2325.82
23.68	868.174	23.68	209.717	-84.6325	23.68	23.68	1500.95
23.69	1309.24	23.69	943.292	13.7489	23.69	23.69	-569.906
23.7	623.19	23.7	914.517	645.396	23.7	23.7	1351.46
23.71	1576.63	23.71	818.805	298.823	23.71	23.71	1091.98
23.72	250.59	23.72	1458.04	593.103	23.72	23.72	2054.09
23.73	-724.573	23.73	1575.37	-147.204	23.73	23.73	2243.94
23.74	1725.52	23.74	1311.82	755.37	23.74	23.74	1421.75
23.75	59.324	23.75	1679.15	1063.15	23.75	23.75	2566.87
23.76	618.81	23.76	1153.24	-425.151	23.76	23.76	1081.76
23.77	1568.27	23.77	1302.79	1275.23	23.77	23.77	2151.85
23.78	719.093	23.78	2138.08	-362.438	23.78	23.78	2046.96
23.79	916.167	23.79	781.986	-217.8	23.79	23.79	2561
23.8	2967.15	23.8	198.179	597.652	23.8	23.8	1486.13
23.81	906.461	23.81	1794.46	1391.03	23.81	23.81	2366.49
23.82	116.259	23.82	1570.53	-324.094	23.82	23.82	450.444
23.83	1578.54	23.83	602.648	424.955	23.83	23.83	3315.44
23.84	1084.37	23.84	-408.725	-856.65	23.84	23.84	1778.15
23.85	1496.46	23.85	2250.4	1642.59	23.85	23.85	-101.979
23.86	2327.14	23.86	2580.93	1103.9	23.86	23.86	1187.82
23.87	3315.1	23.87	2092.1	974.8	23.87	23.87	-788.102
23.88	1001.3	23.88	2537.12	1027.83	23.88	23.88	657.887
23.89	294.46	23.89	1384.41	1315.75	23.89	23.89	1071.52
23.9	1552.11	23.9	790.063	1540	23.9	23.9	469.218
23.91	1789.85	23.91	2787.5	1189.61	23.91	23.91	2388.42
23.92	2590.97	23.92	1373.55	374.026	23.92	23.92	1980.61
23.93	1325.75	23.93	2367.48	824.533	23.93	23.93	1147.06
23.94	404.79	23.94	1919.67	831.997	23.94	23.94	954.441
23.95	919.721	23.95	1101.67	1022.98	23.95	23.95	1666.01
23.96	614.865	23.96	1685.7	812.194	23.96	23.96	1831.05
23.97	2052.7	23.97	2136.29	1326.4	23.97	23.97	1415.14
23.98	477.671	23.98	947.288	1835.12	23.98	23.98	1384.23
23.99	880.425	23.99	1026.4	1277.17	23.99	23.99	1340.16
24	1315.85	24	-25.7472	850.542	24	24	2124.56
24.01	-86.2118	24.01	320.784	869.88	24.01	24.01	1516.95
24.02	1159.48	24.02	746.39	1732.82	24.02	24.02	1454.47
24.03	1579.63	24.03	1177.06	2106.34	24.03	24.03	876.108
24.04	2088.2	24.04	344.449	865.534	24.04	24.04	1561.14
24.05	1287.17	24.05	1954.31	787.223	24.05	24.05	2233.65
24.06	1296.78	24.06	2449.09	-1433.22	24.06	24.06	1572.82
24.07	813.063	24.07	1142.48	-420.525	24.07	24.07	1153.78
24.08	2170.53	24.08	3388.64	-1395.82	24.08	24.08	2220.91
24.09	1721.71	24.09	553.428	183.485	24.09	24.09	2121.93
24.1	2153.85	24.1	1841.41	875.454	24.1	24.1	3029.5
24.11	1448.23	24.11	792.994	422.671	24.11	24.11	1047.36
24.12	1137.97	24.12	2137.25	1185.31	24.12	24.12	1617.71
24.13	-327.635	24.13	2383.88	433.666	24.13	24.13	812.563
24.14	506.313	24.14	1409.23	570.987	24.14	24.14	940.502
24.15	1887.38	24.15	323.541	-67.9815	24.15	24.15	281.006
24.16	658.742	24.16	2027.55	1550.9	24.16	24.16	1225.08
24.17	103.039	24.17	1243.87	1325.28	24.17	24.17	-132.237
24.18	1913.94	24.18	1675.67	1622.17	24.18	24.18	389.687
24.19	663.954	24.19	1070.87	627.9	24.19	24.19	-450.434
24.2	1579.27	24.2	696.883	531.565	24.2	24.2	336.434
24.21	1025.39	24.21	1663.83	103.537	24.21	24.21	1417.76
24.22	941.976	24.22	1616.43	257.86	24.22	24.22	88.2957
24.23	1804.89	24.23	1001.84	1289.44	24.23	24.23	110.756
24.24	1213.03	24.24	1250.22	1111.11	24.24	24.24	2251.16
24.25	1776.63	24.25	2305.83	543.585	24.25	24.25	1697.99
24.26	1016.94	24.26	1541.44	1492.32	24.26	24.26	1162.23
24.27	1127.61	24.27	341.317	6.6184	24.27	24.27	1482.28
24.28	1184.96	24.28	893.736	1065.39	24.28	24.28	2078.49
24.29	2148.15	24.29	1404.63	435.059	24.29	24.29	2713.42
24.3	634.408	24.3	1374.41	-325.238	24.3	24.3	239.803
24.31	3026.67	24.31	1119.47	-183.194	24.31	24.31	2009.35
24.32	2169.53	24.32	2045.69	1523.12	24.32	24.32	2011.94
24.33	1706.85	24.33	-242.132	430.429	24.33	24.33	1227.51
24.34	1847.74	24.34	1011.86	442.287	24.34	24.34	1442.36
24.35	1605.77	24.35	1649.18	874.657	24.35	24.35	1073.86
24.36	830.129	24.36	1484.44	1156.61	24.36	24.36	2621.02
24.37	166.438	24.37	844.277	1044.02	24.37	24.37	1734.1
24.38	1985.11	24.38	1639.22	441.436	24.38	24.38	405.66
24.39	2374.48	24.39	2138.49	348.057	24.39	24.39	660.393
24.4	890.146	24.4	930.455	620.385	24.4	24.4	971.555
24.41	2953.98	24.41	2148	739.889	24.41	24.41	1663.64
24.42	2268.01	24.42	1696.55	544.3	24.42	24.42	1481.96
24.43	1212.21	24.43	1615.79	-194.121	24.43	24.43	1793.09
24.44	422.064	24.44	835.742	311.249	24.44	24.44	498.24
24.45	684.633	24.45	2361.74	2993.45	24.45	24.45	1951.96
24.46	660.15	24.46	1705.41	1390.83	24.46	24.46	952.767
24.47	1243.01	24.47	1112.2	1329.49	24.47	24.47	-326.263
24.48	702.963	24.48	1964.14	-616.649	24.48	24.48	960.888
24.49	1069.09	24.49	2552.76	655.49	24.49	24.49	1073.21
24.5	328.351	24.5	1384.86	906.866	24.5	24.5	1373.64
24.51	596.317	24.51	1285.9	673.194	24.51	24.51	2730.6
24.52	1074.98	24.52	2186.41	-256.917	24.52	24.52	527.749
24.53	847.603	24.53	406.997	1405.66	24.53	24.53	248.318
24.54	671.773	24.54	895.145	2370.76	24.54	24.54	1977.66
24.55	1859.75	24.55	704.892	247.64	24.55	24.55	1271.82
24.56	1010.66	24.56	-221.155	1447.14	24.56	24.56	1800.33
24.57	1247.64	24.57	778.019	1292.84	24.57	24.57	2544.81
24.58	1377.23	24.58	1554.9	634.797	24.58	24.58	1268.22
24.59	1020.31	24.59	273.441	1003.36	24.59	24.59	2308.8
24.6	1969.36	24.6	929.411	730.077	24.6	24.6	903.784
24.61	658.708	24.61	1278.18	748.781	24.61	24.61	1221
24.62	1088.17	24.62	1329.06	2958.18	24.62	24.62	1385.13
24.63	539.408	24.63	1139.12	289.562	24.63	24.63	1537.71
24.64	961.955	24.64	-406.991	412.498	24.64	24.64	820.102
24.65	1028.59	24.65	22.2318	1970.58	24.65	24.65	411.546
24.66	-455.719	24.66	1847.21	187.198	24.66	24.66	840.846
24.67	1039.9	24.67	2229.77	399.717	24.67	24.67	1952.53
24.68	646.285	24.68	2214.38	165.485	24.68	24.68	2491.52
24.69	1166.94	24.69	1091.11	545.612	24.69	24.69	1379.52
24.7	1573.54	24.7	1419.97	1820.57	24.7	24.7	398.42
24.71	792.932	24.71	2064.86	1149.25	24.71	24.71	2601.21
24.72	869.56	24.72	635.604	1149.32	24.72	24.72	1936.74
24.73	1516.8	24.73	1347.97	-428.478	24.73	24.73	949.109
24.74	1791.71	24.74	2534.73	1525.3	24.74	24.74	2347.5
24.75	873.622	24.75	2283.09	854.145	24.75	24.75	1549.28
24.76	1300.1	24.76	1116.11	553.764	24.76	24.76	2129.95
24.77	881.378	24.77	1483.56	-0.9334	24.77	24.77	798.011
24.78	2249.01	24.78	589.02	259.828	24.78	24.78	954.905
24.79	1192.52	24.79	122.443	-72.0114	24.79	24.79	108.339
24.8	1466.37	24.8	1015.72	-638.089	24.8	24.8	2219.37
24.81	1576.84	24.81	2104.72	325.866	24.81	24.81	1598.95
24.82	1196.02	24.82	2779.83	604.71	24.82	24.82	517.784
24.83	2691.42	24.83	658.865	545.045	24.83	24.83	1686.25
24.84	1032.09	24.84	714.413	360.937	24.84	24.84	659.047
24.85	2405.07	24.85	1006.14	115.94	24.85	24.85	1120.73
24.86	894.919	24.86	584.74	1196.16	24.86	24.86	712.451
24.87	1369.49	24.87	1719.72	475.516	24.87	24.87	847.516
24.88	347.766	24.88	2895.77	990.382	24.88	24.88	1659.36
24.89	1938.35	24.89	3024.29	-265.663	24.89	24.89	1022.59
24.9	-926.23	24.9	2381.98	-66.2362	24.9	24.9	-136.595
24.91	805.542	24.91	2157.62	898.477	24.91	24.91	1802.58
24.92	1567.99	24.92	-236.091	1066.37	24.92	24.92	983.937
24.93	1356.96	24.93	752.403	475.3	24.93	24.93	1196.25
24.94	2508.87	24.94	2224.32	922.259	24.94	24.94	1074.91
24.95	1700.51	24.95	381.698	1871.62	24.95	24.95	749.169
24.96	1222.36	24.96	867.679	2296.59	24.96	24.96	1160.34
24.97	2956.75	24.97	388.002	1095.84	24.97	24.97	1702.14
24.98	2540.22	24.98	1058.88	939.455	24.98	24.98	1253.68
24.99	775.455	24.99	760.4	1005.43	24.99	24.99	1625.86
25	1893.77	25	1942.95	984.972	25	25	2206.65
25.01	2733.26	25.01	1190.28	934.282	25.01	25.01	821.478
25.02	1338	25.02	936.333	193.953	25.02	25.02	2294.43
25.03	1520.07	25.03	1457.22	368.477	25.03	25.03	2424.97
25.04	971.388	25.04	1854.15	982.282	25.04	25.04	2072.11
25.05	1871.87	25.05	1602.73	898.672	25.05	25.05	1269.75
25.06	718.828	25.06	2339.79	149.043	25.06	25.06	-633.429
25.07	211.524	25.07	1023.89	-1110.46	25.07	25.07	-136.881
25.08	933.045	25.08	905.955	176.49	25.08	25.08	-362.965
25.09	1506.07	25.09	1728.62	1008.89	25.09	25.09	1988.97
25.1	1232.3	25.1	2840.54	891.142	25.1	25.1	1008.25
25.11	753.693	25.11	855.472	484.117	25.11	25.11	535.635
25.12	1651.32	25.12	1906.52	1536.82	25.12	25.12	132.669
25.13	1776.82	25.13	1568.62	413.797	25.13	25.13	950.243
25.14	2735.9	25.14	1726.09	14.2362	25.14	25.14	-173.013
25.15	1365.38	25.15	1110.99	1027.35	25.15	25.15	1313.54
25.16	1164.41	25.16	1492.41	-179.788	25.16	25.16	1563.93
25.17	1247.57	25.17	2599.19	-42.3596	25.17	25.17	1265.52
25.18	1978.7	25.18	1266.75	1206.76	25.18	25.18	-141.816
25.19	2350.44	25.19	1973.36	-343.962	25.19	25.19	42.3306
25.2	1771.07	25.2	1573.89	-204.375	25.2	25.2	572.763
25.21	2032.41	25.21	1129.85	1280.42	25.21	25.21	1934.18
25.22	1088.53	25.22	2503.86	43.8436	25.22	25.22	814.828
25.23	2309.44	25.23	1398.39	308.378	25.23	25.23	-374.994
25.24	1446.75	25.24	1521.56	508.29	25.24	25.24	1248.26
25.25	1500.53	25.25	1347.59	-238.325	25.25	25.25	-18.6319
25.26	1953.78	25.26	1782.58	918.123	25.26	25.26	348.014
25.27	2094.09	25.27	2147.47	623.247	25.27	25.27	1589.56
25.28	1654.91	25.28	1145.28	369.529	25.28	25.28	1152.07
25.29	1537.55	25.29	2678.98	766.156	25.29	25.29	1426.02
25.3	1923.72	25.3	1796.4	744.034	25.3	25.3	1545.81
25.31	1224.98	25.31	1482.75	1599.8	25.31	25.31	751.21
25.32	419.347	25.32	1550.67	121.318	25.32	25.32	1474.02
25.33	1465.31	25.33	214.167	1191.9	25.33	25.33	432.543
25.34	-101.976	25.34	2106.51	1083.2	25.34	25.34	-414.877
25.35	1668.56	25.35	1638.63	484.96	25.35	25.35	874.181
25.36	1049.93	25.36	2480.51	1174.49	25.36	25.36	1479.86
25.37	-192.458	25.37	2513	383.212	25.37	25.37	3086.8
25.38	1375.14	25.38	2456.8	1349.62	25.38	25.38	2731.35
25.39	1869.77	25.39	1767.18	990.734	25.39	25.39	491.688
25.4	1175.48	25.4	2110.8	592.794	25.4	25.4	2321.36
25.41	732.986	25.41	1246.69	1282.81	25.41	25.41	1535.87
25.42	2611.56	25.42	816.059	326.488	25.42	25.42	1710.73
25.43	1876.81	25.43	919.622	-364.349	25.43	25.43	237.605
25.44	1301.02	25.44	374.688	20.4071	25.44	25.44	745.244
25.45	711.062	25.45	1922.4	688.734	25.45	25.45	1205.5
25.46	1616.96	25.46	2729.67	884.492	25.46	25.46	1034.47
25.47	1636.71	25.47	1636.44	553.509	25.47	25.47	331.98
25.48	1006.1	25.48	642.448	778.316	25.48	25.48	226.891
25.49	1293.95	25.49	1603.08	707.88	25.49	25.49	2312.16
25.5	173.678	25.5	932.642	584.403	25.5	25.5	2022.46
25.51	1174.25	25.51	802.057	209.728	25.51	25.51	2772.8
25.52	803.25	25.52	1673.91	1410.17	25.52	25.52	3196.26
25.53	2013.85	25.53	1791.3	573.575	25.53	25.53	1457.08
25.54	71.771	25.54	565.094	230.479	25.54	25.54	1891.58
25.55	1748.12	25.55	1471.27	-617.216	25.55	25.55	205.973
25.56	2007.31	25.56	2533.3	-243.955	25.56	25.56	-1045.03
25.57	1799.58	25.57	2185.03	83.7567	25.57	25.57	660.786
25.58	1853	25.58	1483.27	829.238	25.58	25.58	2164.26
25.59	1043.33	25.59	2447.78	1668.04	25.59	25.59	2004.37
25.6	581.239	25.6	2.20494	884.641	25.6	25.6	-105.503
25.61	1846.61	25.61	1805.98	1844.99	25.61	25.61	866.925
25.62	341.489	25.62	1121.93	221.923	25.62	25.62	1577.09
25.63	1916.42	25.63	1180.34	788.413	25.63	25.63	797.418
25.64	1775.62	25.64	1264.17	754.595	25.64	25.64	401.88
25.65	1545.04	25.65	1472.97	260.525	25.65	25.65	1843.2
25.66	1787.26	25.66	-264.541	1015.26	25.66	25.66	2105.85
25.67	953.219	25.67	1267.3	1694.14	25.67	25.67	2156.43
25.68	1951.96	25.68	1071.21	151.293	25.68	25.68	1759.61
25.69	1343.86	25.69	1784.76	-1000.45	25.69	25.69	1838.41
25.7	1475.93	25.7	1052.59	-262.652	25.7	25.7	1133.47
25.71	194.063	25.71	1522.86	325.021	25.71	25.71	2215.1
25.72	1020.23	25.72	1034.22	1055.63	25.72	25.72	1291.36
25.73	2632.97	25.73	1445.96	-99.4901	25.73	25.73	979.385
25.74	1689.1	25.74	1095.42	1232.75	25.74	25.74	1927.32
25.75	941.339	25.75	1005.35	788.746	25.75	25.75	444.992
25.76	690.861	25.76	443.874	602.513	25.76	25.76	135.209
25.77	692.698	25.77	2252.06	1094.53	25.77	25.77	1018.35
25.78	1118.84	25.78	1368.89	737.78	25.78	25.78	376.776
25.79	254.119	25.79	1845.68	812.976	25.79	25.79	-215.194
25.8	2305.67	25.8	2315.53	1268.98	25.8	25.8	1981.14
25.81	1396.38	25.81	2520.05	-795.084	25.81	25.81	1055.29
25.82	551.046	25.82	63.1847	1371.87	25.82	25.82	1969.1
25.83	1124.96	25.83	1301.16	1538.45	25.83	25.83	1148.58
25.84	1034.67	25.84	2772.22	1349.67	25.84	25.84	1591.67
25.85	454.756	25.85	1734.98	1161.66	25.85	25.85	1264.37
25.86	1578.74	25.86	1674.59	708.739	25.86	25.86	1384.91
25.87	298.518	25.87	2439.14	-200.974	25.87	25.87	2093.53
25.88	1404.22	25.88	1667.36	342.027	25.88	25.88	789.371
25.89	1866.2	25.89	1298.94	1240.99	25.89	25.89	1896.54
25.9	1174.47	25.9	1551.9	269.343	25.9	25.9	860.958
25.91	1799.31	25.91	1326.19	1011.41	25.91	25.91	2891.05
25.92	1402.54	25.92	710.469	1269.34	25.92	25.92	764.446
25.93	925.171	25.93	2177.64	108.813	25.93	25.93	1685.86
25.94	684.648	25.94	-435.296	1188.36	25.94	25.94	765.909
25.95	286.826	25.95	1712.53	2031.42	25.95	25.95	889.29
25.96	317.963	25.96	1451.45	772.518	25.96	25.96	1524.75
25.97	766.991	25.97	2167.19	1503.26	25.97	25.97	596.635
25.98	1216.35	25.98	914.093	585.006	25.98	25.98	1216.74
25.99	1928.5	25.99	201.591	2065.75	25.99	25.99	1857.01
26	1681.22	26	1787.29	919.85	26	26	1288.83
26.01	1515.54	26.01	910.829	350.26	26.01	26.01	279.018
26.02	1100.45	26.02	297.067	13.0729	26.02	26.02	2899.09
26.03	2608.79	26.03	1034.84	558.447	26.03	26.03	2093.27
26.04	432.457	26.04	1603.21	1023	26.04	26.04	108.823
26.05	495.01	26.05	2658.5	1323.98	26.05	26.05	902.191
26.06	1217.71	26.06	1344.32	123.374	26.06	26.06	1207.59
26.07	1852.8	26.07	869.492	-26.8931	26.07	26.07	1681.91
26.08	1117.69	26.08	834.604	1076.63	26.08	26.08	767.543
26.09	1823.84	26.09	1364.76	1166.56	26.09	26.09	2124.93
26.1	893.449	26.1	213.978	660.966	26.1	26.1	1975.83
26.11	-272.846	26.11	1068.12	124.729	26.11	26.11	1099.15
26.12	-298.633	26.12	1621.78	-283.78	26.12	26.12	2184.79
26.13	164.845	26.13	353.034	389.629	26.13	26.13	1397.22
26.14	1510	26.14	2039.66	1107.63	26.14	26.14	977.069
26.15	1939.63	26.15	623.698	-427.51	26.15	26.15	1254.51
26.16	896.967	26.16	1741.72	609.711	26.16	26.16	1514.36
26.17	2037.18	26.17	1075.43	1459.81	26.17	26.17	1078.45
26.18	1367.31	26.18	-381.273	77.1983	26.18	26.18	77.7131
26.19	2003.25	26.19	463.064	149.184	26.19	26.19	231.339
26.2	1267.49	26.2	1743.11	805.734	26.2	26.2	1665.63
26.21	330.038	26.21	1305.21	1031.41	26.21	26.21	1647.03
26.22	919.066	26.22	860.418	1424.11	26.22	26.22	1786.73
26.23	1145.06	26.23	-52.2562	2145.12	26.23	26.23	1238.26
26.24	844.956	26.24	1306.13	310.348	26.24	26.24	846.728
26.25	191.318	26.25	1445.09	2036.51	26.25	26.25	1867.81
26.26	453.751	26.26	1718	2747.92	26.26	26.26	890.261
26.27	1778.04	26.27	373.048	2383.74	26.27	26.27	627.031
26.28	1087.86	26.28	1719.79	1833.22	26.28	26.28	2356.88
26.29	1715.33	26.29	1810.55	1872.62	26.29	26.29	832.41
26.3	516.31	26.3	1418.59	1492.1	26.3	26.3	1311.44
26.31	1235.82	26.31	860.534	1318.88	26.31	26.31	1487.34
26.32	367.064	26.32	183.738	546.72	26.32	26.32	441.695
26.33	96.5992	26.33	-165.483	822.352	26.33	26.33	2870.41
26.34	1015.64	26.34	1893.31	15.7476	26.34	26.34	975.788
26.35	1197.87	26.35	234.959	32.7041	26.35	26.35	1596.44
26.36	3075.25	26.36	435.54	1976.82	26.36	26.36	315.278
26.37	477.954	26.37	1190.9	711.686	26.37	26.37	1568.6
26.38	905.66	26.38	273.303	149.287	26.38	26.38	1457.9
26.39	-145.081	26.39	2848.05	1727.59	26.39	26.39	1761.02
26.4	1196.5	26.4	1354.25	943.243	26.4	26.4	1614.14
26.41	417.271	26.41	1415.21	317.38	26.41	26.41	1955.97
26.42	1281.76	26.42	1700.12	244.575	26.42	26.42	1039.32
26.43	1017.37	26.43	719.803	747.459	26.43	26.43	2319.38
26.44	350.08	26.44	1647.06	922.056	26.44	26.44	2109.71
26.45	804.592	26.45	1372.76	2108.03	26.45	26.45	-392.92
26.46	897.92	26.46	1552.43	2029.91	26.46	26.46	1293.46
26.47	1193.82	26.47	1226.05	1495.59	26.47	26.47	1866.3
26.48	1172.88	26.48	500.157	1449.71	26.48	26.48	1941.74
26.49	1686.99	26.49	2091.59	1877.39	26.49	26.49	-185.052
26.5	538.552	26.5	372.992	288.112	26.5	26.5	823.059
26.51	786.732	26.51	806.46	2044.2	26.51	26.51	2599.26
26.52	1982.79	26.52	1123.46	1853.59	26.52	26.52	482.63
26.53	1690.82	26.53	1465.5	455.844	26.53	26.53	-402.237
26.54	1610.98	26.54	1241.54	687.898	26.54	26.54	1942
26.55	659.112	26.55	686.65	316.505	26.55	26.55	1201.36
26.56	-412.734	26.56	810.952	1417.34	26.56	26.56	1421.13
26.57	923.373	26.57	1667.76	512.46	26.57	26.57	2990.68
26.58	1627.91	26.58	350.118	1582.36	26.58	26.58	2236.77
26.59	107.497	26.59	432.857	2485.58	26.59	26.59	1260.99
26.6	294.665	26.6	1618.2	1170.73	26.6	26.6	512.939
26.61	224.558	26.61	1267.13	1989.65	26.61	26.61	1696.36
26.62	579.008	26.62	2357.25	761.009	26.62	26.62	390.906
26.63	1237.95	26.63	1197.3	1531.33	26.63	26.63	315.612
26.64	1508.48	26.64	1791.39	289.668	26.64	26.64	932.737
26.65	477.058	26.65	2320.21	1295.03	26.65	26.65	492.58
26.66	1660.16	26.66	2282.04	120.239	26.66	26.66	1402.45
26.67	2274.26	26.67	2853.92	73.5202	26.67	26.67	-139.828
26.68	336.531	26.68	1123.74	1377.57	26.68	26.68	700.269
26.69	1636.68	26.69	1120.84	597.7	26.69	26.69	208.354
26.7	1654.3	26.7	611.165	111.636	26.7	26.7	936.465
26.71	3146.72	26.71	1880.22	279.478	26.71	26.71	1265.03
26.72	834.714	26.72	757.746	460.699	26.72	26.72	1563.39
26.73	2000.07	26.73	973.834	206.344	26.73	26.73	1506.16
26.74	429.193	26.74	1402.37	864.707	26.74	26.74	1366.59
26.75	2696.45	26.75	1442.26	1472.5	26.75	26.75	2427.91
26.76	3025.86	26.76	3257.59	860.17	26.76	26.76	1838.87
26.77	1054.88	26.77	1900.81	1342.04	26.77	26.77	555.954
26.78	1558.72	26.78	1841.95	797.293	26.78	26.78	1131.19
26.79	2732.51	26.79	1539.38	1689.8	26.79	26.79	450.419
26.8	2264.8	26.8	1180.83	1180.83	26.8	26.8	-239.706
26.81	1374.69	26.81	1639.74	2286.67	26.81	26.81	298.018
26.82	1504.32	26.82	1183.42	871.034	26.82	26.82	3167.82
26.83	2927.48	26.83	526.259	1582.67	26.83	26.83	2197.38
26.84	1808.05	26.84	1764.72	977.242	26.84	26.84	760.87
26.85	-282.558	26.85	2541.42	890.641	26.85	26.85	-830.414
26.86	883.096	26.86	2225.73	1297.43	26.86	26.86	1827.93
26.87	421.752	26.87	1973.75	1176.11	26.87	26.87	-858.843
26.88	1237.73	26.88	2519.89	829.782	26.88	26.88	851.061
26.89	1895.02	26.89	2332.7	2519.82	26.89	26.89	1487.84
26.9	1440.92	26.9	714.936	1571.09	26.9	26.9	2493.12
26.91	897.859	26.91	1057.4	153.79	26.91	26.91	1449.77
26.92	1864.42	26.92	1606.23	1665.12	26.92	26.92	1433.15
26.93	745.857	26.93	614.65	1893.01	26.93	26.93	1006.68
26.94	932.816	26.94	1292.25	415.547	26.94	26.94	629.034
26.95	1405.18	26.95	2407.18	41.3218	26.95	26.95	934.685
26.96	1235.27	26.96	1013.49	771.308	26.96	26.96	780.533
26.97	1312.35	26.97	2482.43	1285.06	26.97	26.97	1187.74
26.98	1102.76	26.98	1999.18	846.721	26.98	26.98	1667.59
26.99	597.641	26.99	2548.68	821.168	26.99	26.99	475.986
27	1995.03	27	1375.42	1752.25	27	27	1325.95
27.01	1360.02	27.01	-80.656	1485.61	27.01	27.01	1073.16
27.02	1563.35	27.02	949.007	-307.824	27.02	27.02	116.446
27.03	1514.49	27.03	837.315	340.968	27.03	27.03	1190.09
27.04	200.896	27.04	380.676	1798.22	27.04	27.04	2354.6
27.05	639.363	27.05	1328.93	1196.25	27.05	27.05	1971.28
27.06	1306.25	27.06	839.728	-111.005	27.06	27.06	1625.47
27.07	1480.41	27.07	311.865	650.489	27.07	27.07	147.516
27.08	1202.69	27.08	2262.67	1976.15	27.08	27.08	746.112
27.09	111.104	27.09	1531.84	1339.9	27.09	27.09	2032.21
27.1	650.417	27.1	993.141	-258.359	27.1	27.1	2319.21
27.11	2271.55	27.11	1744.5	2264.52	27.11	27.11	758.801
27.12	1668.48	27.12	911.988	918.112	27.12	27.12	2211.78
27.13	3081.2	27.13	1437.5	586.38	27.13	27.13	2023.95
27.14	1441.81	27.14	1782.35	384.416	27.14	27.14	880.286
27.15	1843.23	27.15	1813.43	1162.96	27.15	27.15	2074.46
27.16	969.737	27.16	1901.85	1181.75	27.16	27.16	1022.67
27.17	1068.12	27.17	303.013	2717.75	27.17	27.17	353.288
27.18	1100.16	27.18	933.737	1674.11	27.18	27.18	2071.72
27.19	633.66	27.19	959.386	1162.05	27.19	27.19	1883.22
27.2	1736.49	27.2	1556.35	1436.74	27.2	27.2	674.444
27.21	1266.41	27.21	498.207	1524.37	27.21	27.21	-562.442
27.22	1058.36	27.22	-109.042	1512.57	27.22	27.22	2085.7
27.23	440.902	27.23	846.067	2014.41	27.23	27.23	1520.41
27.24	865.502	27.24	2559.82	1045.9	27.24	27.24	1651.82
27.25	855.066	27.25	2478.76	859.489	27.25	27.25	1077.09
27.26	1619.65	27.26	2227.98	2045.05	27.26	27.26	928.198
27.27	1691.24	27.27	689.871	643.437	27.27	27.27	2021.29
27.28	1904.8	27.28	1347.37	705.751	27.28	27.28	1564.74
27.29	1367.1	27.29	2298.77	1443.88	27.29	27.29	859.195
27.3	2766.01	27.3	2050.49	95.7704	27.3	27.3	592.492
27.31	1605.62	27.31	2711.5	1663.85	27.31	27.31	322.458
27.32	1340.29	27.32	1370.31	1681.7	27.32	27.32	-71.5272
27.33	1125.38	27.33	660.523	1757.05	27.33	27.33	1003.67
27.34	2236.7	27.34	1386.28	1426.77	27.34	27.34	2119.45
27.35	1891.28	27.35	1966.97	475.333	27.35	27.35	2225.03
27.36	1421.47	27.36	1800.22	915.795	27.36	27.36	2406.8
27.37	1991.97	27.37	1563.71	417.025	27.37	27.37	1317.96
27.38	896.387	27.38	1227.37	1653.5	27.38	27.38	770.336
27.39	256.413	27.39	418.981	1212.18	27.39	27.39	1702.99
27.4	1512.06	27.4	915.063	2040.58	27.4	27.4	681.682
27.41	161.739	27.41	736.9	787.65	27.41	27.41	2203.7
27.42	-148.922	27.42	903.219	1388.25	27.42	27.42	2029.3
27.43	937.048	27.43	525.109	893.333	27.43	27.43	1840.87
27.44	1185.43	27.44	2033.71	597.577	27.44	27.44	1367.55
27.45	1543.82	27.45	911.866	436.187	27.45	27.45	1026.37
27.46	1394.64	27.46	759.071	1396.2	27.46	27.46	1630.24
27.47	1522.77	27.47	2055.51	1659.77	27.47	27.47	2463.68
27.48	2269.51	27.48	781.485	2128.47	27.48	27.48	2107.58
27.49	655.043	27.49	1341.64	591.652	27.49	27.49	-442.047
27.5	912.784	27.5	1273.74	1154.97	27.5	27.5	717.766
27.51	1824.17	27.51	2177.53	1569.72	27.51	27.51	886.76
27.52	1355.96	27.52	1594.8	687.93	27.52	27.52	1275.43
27.53	2004.16	27.53	1452.36	1538.23	27.53	27.53	1085.54
27.54	1396.7	27.54	985.988	1211.02	27.54	27.54	2033.14
27.55	1505.92	27.55	857.37	579.251	27.55	27.55	1513.04
27.56	930.727	27.56	1571.17	1481.28	27.56	27.56	323.751
27.57	1316.62	27.57	857.053	1264.71	27.57	27.57	371.364
27.58	2412.9	27.58	1383.13	2230.26	27.58	27.58	704.296
27.59	736.072	27.59	1785.83	1674.67	27.59	27.59	1686.6
27.6	1826.45	27.6	1727.76	1349.37	27.6	27.6	-482.773
27.61	1445.78	27.61	2192.89	1708.61	27.61	27.61	143.219
27.62	178.536	27.62	-156.854	1036.72	27.62	27.62	1539.59
27.63	2278.35	27.63	1605.66	1138.88	27.63	27.63	1902.19
27.64	1115.26	27.64	811.759	1270	27.64	27.64	1773.59
27.65	310.629	27.65	1879.92	896.215	27.65	27.65	841.855
27.66	1569.17	27.66	1675.03	894.48	27.66	27.66	209.197
27.67	-132.991	27.67	1162.62	1477.76	27.67	27.67	862.484
27.68	545.437	27.68	824.492	1034.03	27.68	27.68	68.4435
27.69	1188.33	27.69	1286.21	575.189	27.69	27.69	-55.8803
27.7	1004.91	27.7	1320.82	1093.54	27.7	27.7	2586.31
27.71	1975.93	27.71	40.3906	1237.1	27.71	27.71	1725.51
27.72	2051.29	27.72	1156.36	1031.64	27.72	27.72	2813.51
27.73	1394.71	27.73	2068.71	854.875	27.73	27.73	731.711
27.74	1259.77	27.74	823.444	1478.25	27.74	27.74	1525.37
27.75	471.482	27.75	1840.24	975.786	27.75	27.75	209.345
27.76	358.09	27.76	1924.44	584.478	27.76	27.76	455.396
27.77	1312.11	27.77	891.178	985.239	27.77	27.77	422.631
27.78	1882.61	27.78	1083.15	-41.47	27.78	27.78	1091.44
27.79	2255.02	27.79	428.606	1273.49	27.79	27.79	1366.4
27.8	1227.9	27.8	999.65	1047.15	27.8	27.8	-826.688
27.81	660.056	27.81	409.523	-1019.03	27.81	27.81	928.728
27.82	888.78	27.82	1859.93	1778.36	27.82	27.82	-131.406
27.83	550.577	27.83	2900.18	2422.38	27.83	27.83	2166.25
27.84	375.111	27.84	1928.4	259.821	27.84	27.84	2452.87
27.85	294.346	27.85	2444.18	322.379	27.85	27.85	682.501
27.86	1341.1	27.86	2109.29	742.448	27.86	27.86	2146.54
27.87	1499.09	27.87	1561.76	418.967	27.87	27.87	395.249
27.88	1315.05	27.88	1168.8	1915.78	27.88	27.88	1038.95
27.89	2330.45	27.89	1648.27	1054.18	27.89	27.89	2701.11
27.9	1763.43	27.9	1466.42	1059.26	27.9	27.9	759.687
27.91	2786.43	27.91	1640.56	1094.96	27.91	27.91	1739.51
27.92	534.356	27.92	771.398	2708.18	27.92	27.92	2340.33
27.93	1861.83	27.93	1497.37	1179.29	27.93	27.93	-533.698
27.94	1189.03	27.94	2212.16	-412.349	27.94	27.94	2592.96
27.95	2398.48	27.95	2553.85	585.476	27.95	27.95	2518.95
27.96	1774	27.96	2003.5	499.304	27.96	27.96	3913.36
27.97	334.555	27.97	912.031	-30.9891	27.97	27.97	2393.04
27.98	313.344	27.98	1543.56	1460.25	27.98	27.98	1803.36
27.99	1733.08	27.99	3238.35	859.417	27.99	27.99	1853.21
28	2320.94	28	930.522	1504.2	28	28	958.304
28.01	2821.51	28.01	560.661	286.233	28.01	28.01	2082.49
28.02	1266.95	28.02	1024.37	44.459	28.02	28.02	1963.96
28.03	1141.28	28.03	1169.1	178.948	28.03	28.03	2134.76
28.04	2156.86	28.04	1737.67	950.565	28.04	28.04	2887.34
28.05	1703.15	28.05	1358.73	-129.966	28.05	28.05	2291.9
28.06	1633.19	28.06	2380.09	902.521	28.06	28.06	926.596
28.07	164.109	28.07	2146.42	1780.51	28.07	28.07	1428.86
28.08	1456.72	28.08	802.243	1574.72	28.08	28.08	1286.29
28.09	1004.44	28.09	2464.6	1164.31	28.09	28.09	328.299
28.1	998.572	28.1	1928.37	-93.8402	28.1	28.1	1309.68
28.11	1391.87	28.11	1308.91	579.844	28.11	28.11	3116.49
28.12	1282.48	28.12	730.278	581.12	28.12	28.12	2024.7
28.13	1168.49	28.13	2116.54	1743.17	28.13	28.13	2136.08
28.14	2274.16	28.14	1237.42	1525.76	28.14	28.14	76.0322
28.15	1099.4	28.15	2377.92	1799.39	28.15	28.15	1754.54
28.16	1084.73	28.16	1917.95	1940	28.16	28.16	675.018
28.17	1348.38	28.17	1873.68	991.1	28.17	28.17	1317.79
28.18	2065.57	28.18	2424.49	1619.55	28.18	28.18	1386.04
28.19	1965	28.19	2736.03	1697.65	28.19	28.19	2512.96
28.2	1067.24	28.2	2885.66	558.596	28.2	28.2	1208.42
28.21	-403.564	28.21	1697.98	856.502	28.21	28.21	2189.58
28.22	1082.73	28.22	964.602	848.82	28.22	28.22	1218.34
28.23	1247.32	28.23	2277.07	892.697	28.23	28.23	1166.8
28.24	610.665	28.24	1833.93	1411.63	28.24	28.24	433.295
28.25	955.85	28.25	1760.41	656.391	28.25	28.25	601.175
28.26	1973.04	28.26	2286.84	1237.39	28.26	28.26	1157.79
28.27	2057.74	28.27	2135.39	1256.05	28.27	28.27	1196.26
28.28	1782.14	28.28	2071.18	1749.38	28.28	28.28	1862.37
28.29	2609.64	28.29	679.836	566.504	28.29	28.29	1620.24
28.3	1558.18	28.3	2817.19	612.884	28.3	28.3	2054.87
28.31	1898.61	28.31	2370.23	1298.4	28.31	28.31	2596.5
28.32	1623.99	28.32	1043.91	1754.94	28.32	28.32	1892.57
28.33	1478.81	28.33	1449.9	697.525	28.33	28.33	2180.59
28.34	1700.72	28.34	1708.38	1933.07	28.34	28.34	1026.48
28.35	3420.13	28.35	1969.57	1578.46	28.35	28.35	2809.73
28.36	1209.44	28.36	1930.8	1700.82	28.36	28.36	444.368
28.37	732.663	28.37	1504.45	1452.22	28.37	28.37	1934.43
28.38	1649.7	28.38	2923.63	1075.89	28.38	28.38	1300.78
28.39	1938.35	28.39	1722.94	1797.02	28.39	28.39	-251.448
28.4	-356.754	28.4	2227.35	1069.95	28.4	28.4	1817.23
28.41	1354.9	28.41	1691.4	2385.99	28.41	28.41	1216.85
28.42	1785.84	28.42	2777.82	1759.59	28.42	28.42	1277.73
28.43	1605.78	28.43	2480.22	2360.65	28.43	28.43	-810.814
28.44	809.988	28.44	3252.63	2266.56	28.44	28.44	1554.57
28.45	2257.22	28.45	1967.76	2148.27	28.45	28.45	2473.45
28.46	2608.76	28.46	2323.74	1311.32	28.46	28.46	2652.16
28.47	2945.14	28.47	2867.21	779.42	28.47	28.47	783.991
28.48	2967.87	28.48	2962.8	1478.79	28.48	28.48	1796.61
28.49	2302.07	28.49	3069.48	1409.56	28.49	28.49	-619.234
28.5	2933.99	28.5	2187.64	1394.38	28.5	28.5	1565.68
28.51	2088.7	28.51	1844.33	1358.2	28.51	28.51	1788.4
28.52	1798.82	28.52	2751.97	2065.35	28.52	28.52	869.556
28.53	943.207	28.53	3047.21	1842.38	28.53	28.53	804.067
28.54	1243.88	28.54	2969.29	2341.51	28.54	28.54	942.702
28.55	2565.73	28.55	1833	308.9	28.55	28.55	1219.77
28.56	2461.95	28.56	1616.54	1334.58	28.56	28.56	1800.66
28.57	1206.06	28.57	2403.26	2135.18	28.57	28.57	402.523
28.58	519.363	28.58	1335.26	-10.0329	28.58	28.58	1078.57
28.59	963.432	28.59	1626.98	1690.29	28.59	28.59	-48.2011
28.6	2130.81	28.6	3271.85	488.345	28.6	28.6	1267.81
28.61	1771.32	28.61	1808.31	1890.81	28.61	28.61	1028.79
28.62	2399.13	28.62	2466.91	1635.51	28.62	28.62	1515.98
28.63	1655.1	28.63	2256.71	28.2822	28.63	28.63	1579.1
28.64	2620.53	28.64	2610.52	820.507	28.64	28.64	2834.29
28.65	2616.48	28.65	2215.94	2132.43	28.65	28.65	2381.3
28.66	1932.55	28.66	3723.57	2051.05	28.66	28.66	2324.94
28.67	1904.07	28.67	3483.87	1193.87	28.67	28.67	-288.7
28.68	2031.13	28.68	653.143	1470.18	28.68	28.68	573.356
28.69	444.714	28.69	2033.36	1042.36	28.69	28.69	745.556
28.7	1425.21	28.7	2485.3	1660.01	28.7	28.7	1267.73
28.71	1937.4	28.71	1684.09	1045.28	28.71	28.71	2282.19
28.72	1546.18	28.72	1190.95	539.508	28.72	28.72	1010.57
28.73	830.538	28.73	2595.31	1007.6	28.73	28.73	2240.7
28.74	1760.79	28.74	2165.37	571.388	28.74	28.74	3117.92
28.75	1650.79	28.75	3098.1	1672.8	28.75	28.75	984.164
28.76	2104.53	28.76	3290.58	1251.99	28.76	28.76	1669.31
28.77	2079.71	28.77	2038.44	717.439	28.77	28.77	2208.63
28.78	1522.56	28.78	513.825	1220.62	28.78	28.78	2085.32
28.79	211.26	28.79	1882.03	2010.49	28.79	28.79	1146.88
28.8	1708.93	28.8	1967.66	342.576	28.8	28.8	3042.07
28.81	628.969	28.81	707.407	1577.21	28.81	28.81	830.802
28.82	472.309	28.82	2074.86	1443.66	28.82	28.82	142.693
28.83	1418.64	28.83	2107.99	889.942	28.83	28.83	1955.49
28.84	1414.7	28.84	1972.53	992.797	28.84	28.84	2103.51
28.85	625.476	28.85	2573.16	822.528	28.85	28.85	1751.2
28.86	1312.79	28.86	2934.18	1253	28.86	28.86	1304.8
28.87	1281.04	28.87	3333.36	2013.48	28.87	28.87	902.05
28.88	1486.5	28.88	1935.22	2022.99	28.88	28.88	666.092
28.89	514.145	28.89	1225.03	2018.31	28.89	28.89	2909.36
28.9	2559.94	28.9	1141.6	1047.36	28.9	28.9	986.035
28.91	1374.36	28.91	2801.06	136.609	28.91	28.91	588.072
28.92	1042.79	28.92	2715.15	627.069	28.92	28.92	1525.51
28.93	1637.54	28.93	2708.77	104.834	28.93	28.93	1593.62
28.94	669.122	28.94	2129.91	1572.31	28.94	28.94	779.534
28.95	1000.58	28.95	1987.43	1898.81	28.95	28.95	4389.95
28.96	2456.95	28.96	2083.53	2271.71	28.96	28.96	2123.5
28.97	1310.05	28.97	2284.25	1734.42	28.97	28.97	3062.88
28.98	1422.68	28.98	1306.87	1345.33	28.98	28.98	2212.64
28.99	2464.68	28.99	2160.84	1095.85	28.99	28.99	2358.27
29	880.271	29	3382.27	1352.94	29	29	1925.04
29.01	1778.58	29.01	2903.61	1755.59	29.01	29.01	529.889
29.02	2320.27	29.02	1389.77	2736.85	29.02	29.02	992.385
29.03	1540.6	29.03	1398.83	726.783	29.03	29.03	702.557
29.04	1049.27	29.04	1429.4	-278.45	29.04	29.04	2639.9
29.05	2279.35	29.05	2000.48	484.152	29.05	29.05	269.502
29.06	1133.36	29.06	2632.89	969.426	29.06	29.06	1743.78
29.07	691.3	29.07	1645.91	557.265	29.07	29.07	736.227
29.08	2110.31	29.08	2287.75	1401.56	29.08	29.08	-81.8422
29.09	3000.8	29.09	1350.64	765.252	29.09	29.09	954.831
29.1	431.693	29.1	1329.16	550.312	29.1	29.1	1093.55
29.11	1472.3	29.11	2511.54	1970.38	29.11	29.11	495.306
29.12	1574.18	29.12	2540.49	1054.47	29.12	29.12	1698.05
29.13	2756	29.13	2505.94	1215.61	29.13	29.13	2530.19
29.14	2318.36	29.14	1675.4	1232.84	29.14	29.14	1188.45
29.15	1594.54	29.15	1504.44	1349.3	29.15	29.15	150.847
29.16	1888.7	29.16	1643.11	907.326	29.16	29.16	314.58
29.17	1933.85	29.17	1835.37	1136.92	29.17	29.17	2748.98
29.18	2150.61	29.18	1396.8	1065.1	29.18	29.18	987.364
29.19	1812.25	29.19	2590.52	341.362	29.19	29.19	2055.52
29.2	1750.36	29.2	3664.24	698.485	29.2	29.2	1598.05
29.21	1838.76	29.21	994.567	2467.17	29.21	29.21	455.329
29.22	1464.94	29.22	1402.84	1408.73	29.22	29.22	2580.55
29.23	1547.37	29.23	1465.47	20.0506	29.23	29.23	2289.3
29.24	926.013	29.24	1312.59	993.945	29.24	29.24	723.418
29.25	1409.73	29.25	2467.42	1492.04	29.25	29.25	1374.81
29.26	1906.96	29.26	1475.87	1394.58	29.26	29.26	758.939
29.27	840.176	29.27	526.517	802.766	29.27	29.27	316.612
29.28	2363.08	29.28	1296.25	2366.45	29.28	29.28	1349.32
29.29	-338.88	29.29	871.738	1365.24	29.29	29.29	2237.09
29.3	587.934	29.3	2428.38	1173.65	29.3	29.3	1390.38
29.31	339.766	29.31	2070.16	-31.6932	29.31	29.31	973.64
29.32	2375.64	29.32	972.872	423.923	29.32	29.32	2666.56
29.33	2261.04	29.33	1128.41	-836.822	29.33	29.33	2243.84
29.34	2759.24	29.34	1518.96	-729.112	29.34	29.34	2952.16
29.35	2086.72	29.35	2369.81	1686.42	29.35	29.35	1806.95
29.36	3138.31	29.36	868.352	728.507	29.36	29.36	1566.18
29.37	2683.01	29.37	1203.73	1664.8	29.37	29.37	1639.8
29.38	2314.45	29.38	3343.38	1049.33	29.38	29.38	339.688
29.39	2451.77	29.39	2055.78	670.105	29.39	29.39	337.696
29.4	3051.52	29.4	1927.81	2586.6	29.4	29.4	936.374
29.41	1264.69	29.41	1213.81	1166.96	29.41	29.41	1889.23
29.42	1924.29	29.42	1410.3	1121.1	29.42	29.42	654.291
29.43	432.331	29.43	2462.46	840.095	29.43	29.43	2456.15
29.44	385.277	29.44	598.364	33.8234	29.44	29.44	2618.2
29.45	2851.02	29.45	1332.32	1345.33	29.45	29.45	1153.67
29.46	2134.04	29.46	2082.39	100.515	29.46	29.46	2045.9
29.47	1163.42	29.47	1466.73	1574.97	29.47	29.47	2245.23
29.48	2168.8	29.48	1517.24	932.385	29.48	29.48	67.6142
29.49	475.32	29.49	1129.38	1258.54	29.49	29.49	1048.12
29.5	1911.43	29.5	1382.71	950.535	29.5	29.5	2472.01
29.51	2568.93	29.51	2990.2	1474.29	29.51	29.51	779.58
29.52	1547.28	29.52	1127.99	1766.25	29.52	29.52	-396.12
29.53	1905.94	29.53	689.564	1859.79	29.53	29.53	2615.91
29.54	1184.61	29.54	1711.03	2110.27	29.54	29.54	1814.29
29.55	1956.68	29.55	1755.28	1728.5	29.55	29.55	1964.44
29.56	1065.77	29.56	1177.6	1067.83	29.56	29.56	1428.93
29.57	2253.82	29.57	1025.42	1181.21	29.57	29.57	981.439
29.58	1718.45	29.58	665.87	355.568	29.58	29.58	2672.25
29.59	1574.24	29.59	786.979	64.6708	29.59	29.59	2301.82
29.6	2809.03	29.6	1390.27	1915.9	29.6	29.6	1327.14
29.61	1969.83	29.61	-38.9005	1535.09	29.61	29.61	628.877
29.62	1385.5	29.62	270.689	1293.55	29.62	29.62	1563.4
29.63	1658.42	29.63	-200.571	1425.56	29.63	29.63	884.134
29.64	1385.66	29.64	898.191	1712.04	29.64	29.64	930.567
29.65	2163.61	29.65	1912.28	1964.26	29.65	29.65	1834.39
29.66	2622.62	29.66	2120.12	660.673	29.66	29.66	2654.17
29.67	3408.26	29.67	2425.08	312.725	29.67	29.67	1556.66
29.68	1763.39	29.68	766.874	510.949	29.68	29.68	1144.39
29.69	863.907	29.69	1096.72	1111.53	29.69	29.69	1794.52
29.7	1247.26	29.7	1453.76	1173.93	29.7	29.7	1108.22
29.71	1830.2	29.71	1409.95	1164.6	29.71	29.71	1196.28
29.72	1440.92	29.72	488.33	2371.39	29.72	29.72	1030.75
29.73	3394.15	29.73	1011.35	810.215	29.73	29.73	1725.94
29.74	2365.7	29.74	2118.05	279.343	29.74	29.74	1090.51
29.75	2427.03	29.75	1176.32	118.384	29.75	29.75	906.198
29.76	937.475	29.76	1854.59	531.161	29.76	29.76	961.758
29.77	2846.13	29.77	1407.73	2058.75	29.77	29.77	1809.25
29.78	968.005	29.78	1038.04	1493.41	29.78	29.78	1841.02
29.79	877.716	29.79	1533.12	1030.78	29.79	29.79	1435.17
29.8	1086.77	29.8	1521.92	1155.57	29.8	29.8	3131.04
29.81	1877.27	29.81	700.975	638.392	29.81	29.81	3398.97
29.82	2355.62	29.82	1954.69	-129.326	29.82	29.82	1838.72
29.83	2229.96	29.83	1549.49	1452.01	29.83	29.83	1786.55
29.84	705.245	29.84	2662.03	514.007	29.84	29.84	-784.824
29.85	1535.89	29.85	2107.98	286.269	29.85	29.85	805.423
29.86	1723.83	29.86	3282.94	1584.68	29.86	29.86	1342.26
29.87	1976.35	29.87	1425.74	976.585	29.87	29.87	1732.03
29.88	2342.29	29.88	547.448	1951.81	29.88	29.88	1498.52
29.89	2055.54	29.89	881.487	1161.2	29.89	29.89	1948.13
29.9	797.842	29.9	1280.06	1195.6	29.9	29.9	-25.3252
29.91	600.046	29.91	443.647	508.688	29.91	29.91	685.895
29.92	2508.76	29.92	1935.46	1018.68	29.92	29.92	3101.68
29.93	1630.31	29.93	1768.68	482.197	29.93	29.93	879.479
29.94	1170.37	29.94	1059.04	747.712	29.94	29.94	1200.34
29.95	1669.66	29.95	1780.36	2104.01	29.95	29.95	928.496
29.96	1309.4	29.96	1943.75	1125.35	29.96	29.96	454.538
29.97	2020.23	29.97	2178.48	947.894	29.97	29.97	1817.81
29.98	880.977	29.98	2092.16	340.234	29.98	29.98	2068.83
29.99	2326.01	29.99	2455.21	1663.41	29.99	29.99	2076.5
30	2740.71	30	1738.54	781.198	30	30	2016.09
30.01	1035.81	30.01	2192.05	1663.34	30.01	30.01	2547.34
30.02	1541.29	30.02	1151.35	730.088	30.02	30.02	2541.56
30.03	1951.27	30.03	2206.27	429.131	30.03	30.03	2423.28
30.04	496.296	30.04	1686.94	1236.47	30.04	30.04	1278.37
30.05	761.374	30.05	1773.85	413.942	30.05	30.05	3134.06
30.06	1551.51	30.06	2604.39	190.238	30.06	30.06	1977.16
30.07	1257.75	30.07	2539.29	2153.42	30.07	30.07	1460.3
30.08	2811.94	30.08	1270.64	2391.67	30.08	30.08	-99.5668
30.09	1818.78	30.09	2228	665.618	30.09	30.09	294.043
30.1	1762.44	30.1	728.93	620.029	30.1	30.1	216.263
30.11	2465.09	30.11	1187.39	1266.56	30.11	30.11	459.805
30.12	1316.69	30.12	1553.74	658.06	30.12	30.12	1352.22
30.13	1535.83	30.13	2430.66	1938.03	30.13	30.13	735.163
30.14	1564.83	30.14	1900.02	1441.4	30.14	30.14	1631.69
30.15	1509.67	30.15	2214.99	402.503	30.15	30.15	1794.19
30.16	2159.48	30.16	2396.23	1620.48	30.16	30.16	3211.6
30.17	1775.99	30.17	2370.48	2101.01	30.17	30.17	2883.97
30.18	1801.79	30.18	2355.91	924.733	30.18	30.18	2070.4
30.19	2459.39	30.19	2047.96	2081.16	30.19	30.19	-75.7744
30.2	2417.22	30.2	445.573	677.887	30.2	30.2	1003.44
30.21	860.828	30.21	411.682	1629.67	30.21	30.21	2035.95
30.22	1411.46	30.22	834.888	2089.23	30.22	30.22	2190.88
30.23	2476.33	30.23	2772.68	945.12	30.23	30.23	579.479
30.24	1071.42	30.24	2247.13	-106.178	30.24	30.24	1435.83
30.25	1303.28	30.25	2784.98	619.583	30.25	30.25	1373.05
30.26	2481.03	30.26	1369.76	1583.32	30.26	30.26	903.867
30.27	1553.68	30.27	2461.51	1130.51	30.27	30.27	1443.08
30.28	822.299	30.28	1642.2	1362.43	30.28	30.28	552.23
30.29	2179.9	30.29	1432.92	1760.09	30.29	30.29	1722.29
30.3	1707.63	30.3	1345.34	1088.53	30.3	30.3	24.4632
30.31	2697.39	30.31	694.862	2029.6	30.31	30.31	1641.73
30.32	1665.64	30.32	866.564	-193.91	30.32	30.32	1351.26
30.33	1868.35	30.33	1378.31	757.077	30.33	30.33	1058.07
30.34	2025.94	30.34	2282.95	2411.44	30.34	30.34	489.945
30.35	144.77	30.35	3468.64	428.633	30.35	30.35	1501.75
30.36	1094.12	30.36	2006.77	1153.62	30.36	30.36	18.6006
30.37	2406.41	30.37	261.282	924.987	30.37	30.37	-124.925
30.38	2934.25	30.38	3001.17	979.671	30.38	30.38	2612.64
30.39	2031.66	30.39	3083.13	1260.45	30.39	30.39	1439.72
30.4	2143.97	30.4	3385.34	998.675	30.4	30.4	468.874
30.41	2220.6	30.41	1882.19	184.339	30.41	30.41	2339.72
30.42	2049.99	30.42	-265.797	1316.85	30.42	30.42	2345.87
30.43	2283.29	30.43	1680.29	275.768	30.43	30.43	2047.98
30.44	652.608	30.44	2266.27	400.111	30.44	30.44	2042.7
30.45	2116.01	30.45	2965.38	1436.14	30.45	30.45	1116.65
30.46	2598.5	30.46	3159.7	1673.46	30.46	30.46	2073.17
30.47	3488.6	30.47	1426	1236.44	30.47	30.47	2342.1
30.48	2436.29	30.48	2314.89	1611.17	30.48	30.48	2060.18
30.49	2404.87	30.49	983.709	575.404	30.49	30.49	2050.12
30.5	1327.69	30.5	1633.98	1341.8	30.5	30.5	2204.57
30.51	857.129	30.51	2435.06	1155.42	30.51	30.51	2053.75
30.52	2259.69	30.52	1313.2	1651.15	30.52	30.52	2084.93
30.53	2799.15	30.53	2393.46	1902.43	30.53	30.53	2264.86
30.54	640.423	30.54	1759.3	1944.83	30.54	30.54	1984.13
30.55	2249.07	30.55	1908.21	1794.4	30.55	30.55	1438.96
30.56	2463.05	30.56	1380.05	872.311	30.56	30.56	1185.79
30.57	710.026	30.57	1225.56	948.343	30.57	30.57	814.577
30.58	735.249	30.58	1180.8	2044.15	30.58	30.58	1900.6
30.59	1110.41	30.59	1674.17	1579.45	30.59	30.59	688.897
30.6	2149.32	30.6	1511.1	1034.57	30.6	30.6	330.381
30.61	2090.75	30.61	1206.48	1028.87	30.61	30.61	2078.5
30.62	2573.81	30.62	1422.16	1071.57	30.62	30.62	1189.23
30.63	3143.55	30.63	1991.09	795.957	30.63	30.63	2597.81
30.64	2589.83	30.64	1709.22	744.922	30.64	30.64	2682.35
30.65	1143.37	30.65	2128.11	1399.27	30.65	30.65	2674.86
30.66	1145.54	30.66	2080.66	2246.77	30.66	30.66	2004.57
30.67	2226.31	30.67	1323.3	1188.09	30.67	30.67	2137.19
30.68	2022.69	30.68	1418.82	452.305	30.68	30.68	450.599
30.69	1152.42	30.69	2421.07	1038.26	30.69	30.69	2683.77
30.7	2098.51	30.7	895.631	1846.31	30.7	30.7	2049.23
30.71	2469.78	30.71	800.201	921.497	30.71	30.71	407.264
30.72	3818.45	30.72	1231.35	678.291	30.72	30.72	835.621
30.73	2238.59	30.73	2679.13	1936.21	30.73	30.73	791.015
30.74	2238.92	30.74	3016.42	184.228	30.74	30.74	2033.6
30.75	1762.68	30.75	2395.04	530.065	30.75	30.75	686.371
30.76	1093.06	30.76	1668.76	1966.81	30.76	30.76	2151.46
30.77	2702.89	30.77	1433.24	260.345	30.77	30.77	2196.47
30.78	1438.16	30.78	1609.22	606.009	30.78	30.78	2059.61
30.79	1674.96	30.79	2437.04	1376.25	30.79	30.79	2744.31
30.8	814.319	30.8	3151.05	1357.15	30.8	30.8	1591.63
30.81	2254.44	30.81	1945.7	1365.27	30.81	30.81	2934.47
30.82	1328.04	30.82	3856.15	1100.35	30.82	30.82	1611.28
30.83	2083.53	30.83	940.264	1317.49	30.83	30.83	1451.48
30.84	2857.2	30.84	2661.24	-150.127	30.84	30.84	1648.67
30.85	1400.35	30.85	2250.52	1296.32	30.85	30.85	1714.31
30.86	1766.98	30.86	657.942	1411.13	30.86	30.86	1292.5
30.87	3283.36	30.87	1193.14	1370.09	30.87	30.87	2256.02
30.88	3357.67	30.88	2468.37	512.044	30.88	30.88	1828.07
30.89	2239.98	30.89	2032.11	1418.25	30.89	30.89	2961.7
30.9	3199.27	30.9	3055.34	1936.87	30.9	30.9	2844.09
30.91	3663.09	30.91	2086.56	853.138	30.91	30.91	2260.85
30.92	3376.27	30.92	1843.33	803.2	30.92	30.92	96.6916
30.93	2198.01	30.93	2625.62	1762.51	30.93	30.93	3185.26
30.94	1124.14	30.94	2365.07	743.102	30.94	30.94	2795.71
30.95	1696.81	30.95	2766.09	875.742	30.95	30.95	3383.53
30.96	2882.89	30.96	3893.89	2312.11	30.96	30.96	3494.29
30.97	3369.93	30.97	3544.13	2070.55	30.97	30.97	1549.9
30.98	3577.48	30.98	2446.58	2637.38	30.98	30.98	2312.32
30.99	1741.77	30.99	3587.34	1886.28	30.99	30.99	1515.43
31	3112.99	31	3279.15	2027.78	31	31	2337.57
31.01	3111.91	31.01	3371.32	2333.27	31.01	31.01	3341.85
31.02	3662.43	31.02	2596.71	3041.77	31.02	31.02	3243.43
31.03	2090.03	31.03	3490.71	1143.15	31.03	31.03	2644.64
31.04	3431.75	31.04	4480.74	2513.74	31.04	31.04	2063.68
31.05	2601.74	31.05	3648.69	2367.32	31.05	31.05	3022.11
31.06	4084.18	31.06	5015.74	3294.58	31.06	31.06	3393.51
31.07	3099.42	31.07	3235.03	4199.43	31.07	31.07	4130.79
31.08	3165.72	31.08	3954.08	3356.12	31.08	31.08	3327.6
31.09	2639.37	31.09	3461.78	4506.64	31.09	31.09	3293
31.1	3242.38	31.1	4868.22	4428.95	31.1	31.1	2127.26
31.11	4600.18	31.11	5580.86	5237.71	31.11	31.11	2820.64
31.12	4460.86	31.12	6809.82	5770.76	31.12	31.12	4187.81
31.13	5148.39	31.13	5906.57	6444.63	31.13	31.13	4792.75
31.14	4206.7	31.14	7517.52	6916.42	31.14	31.14	5960.86
31.15	4915.22	31.15	7168.3	7344.09	31.15	31.15	5794.77
31.16	4641.21	31.16	8911.85	10042.1	31.16	31.16	4891.38
31.17	5626.27	31.17	8940.48	10415	31.17	31.17	8649.96
31.18	6009.46	31.18	8793.53	11108.6	31.18	31.18	6926.45
31.19	5172.03	31.19	10077.5	11497.7	31.19	31.19	9559.94
31.2	5304.92	31.2	12682.1	12505.6	31.2	31.2	11050.3
31.21	7930.3	31.21	11835.7	12443.9	31.21	31.21	14734.7
31.22	8434.18	31.22	12489.3	12670.3	31.22	31.22	16308
31.23	7670.78	31.23	13566.7	13615.9	31.23	31.23	17439.2
31.24	8324.53	31.24	13744.5	12886.6	31.24	31.24	19519.7
31.25	7959.38	31.25	14502.3	13447.9	31.25	31.25	22522.1
31.26	8574.33	31.26	15346.2	13683.5	31.26	31.26	24665.8
31.27	11347.9	31.27	13632.6	11571.5	31.27	31.27	22507.7
31.28	10209.6	31.28	14312.1	12623.4	31.28	31.28	24181.4
31.29	10500	31.29	15446.9	12283.2	31.29	31.29	23930.9
31.3	11743	31.3	14499.4	11506.6	31.3	31.3	23074.6
31.31	10245.3	31.31	14499.4	11863.2	31.31	31.31	22239.2
31.32	11582.9	31.32	11478.7	12056.6	31.32	31.32	21404.4
31.33	11590.8	31.33	12414.4	9396.48	31.33	31.33	19977.6
31.34	11681.3	31.34	11265.1	7797.4	31.34	31.34	18881.6
31.35	11077.9	31.35	9888.91	8284.68	31.35	31.35	15745.9
31.36	10533.5	31.36	10135.3	7378	31.36	31.36	14961.5
31.37	8861.65	31.37	10515.6	6001.75	31.37	31.37	14292.9
31.38	10237.8	31.38	8705.94	5485.54	31.38	31.38	11713.1
31.39	9250.15	31.39	8990.31	5849.22	31.39	31.39	9025.64
31.4	9387.72	31.4	8319.44	4989.14	31.4	31.4	9049.39
31.41	7203.59	31.41	8687.46	3324.31	31.41	31.41	7666.91
31.42	8466.18	31.42	6032.42	3987.74	31.42	31.42	7257.4
31.43	7294.22	31.43	4835.28	3618.02	31.43	31.43	5677.19
31.44	6200.31	31.44	5499	3267.49	31.44	31.44	3992.95
31.45	5018.82	31.45	5305.71	3256.67	31.45	31.45	3963.26
31.46	5685.15	31.46	3583.27	2884.75	31.46	31.46	4722.29
31.47	4771.89	31.47	5335.51	2611.54	31.47	31.47	3429.45
31.48	5427.21	31.48	3294.77	1636.67	31.48	31.48	3652.69
31.49	3420.18	31.49	4004.44	2390.79	31.49	31.49	3985.05
31.5	5451.93	31.5	3583.31	1833.03	31.5	31.5	3424.24
31.51	5455.07	31.51	3094.67	1814.6	31.51	31.51	2877.67
31.52	5349.42	31.52	2787.72	2038.42	31.52	31.52	1730.35
31.53	3943.36	31.53	2175.07	1254.41	31.53	31.53	3028.63
31.54	4901.65	31.54	3109.89	1272.15	31.54	31.54	2080.8
31.55	3702.35	31.55	2388.02	1670.47	31.55	31.55	2444.64
31.56	3097.64	31.56	1307.61	941.934	31.56	31.56	2068.02
31.57	2306.25	31.57	1701.55	1940.36	31.57	31.57	1506.77
31.58	2416.6	31.58	3507.78	2370.76	31.58	31.58	1250.51
31.59	2940.57	31.59	1976.82	2771.2	31.59	31.59	1504.91
31.6	1564.42	31.6	2208.77	2185.63	31.6	31.6	514.2
31.61	2735.36	31.61	2066.56	2344.26	31.61	31.61	623.318
31.62	2198.36	31.62	2119.8	1582.07	31.62	31.62	1138.84
31.63	2204.88	31.63	3228.94	1720.08	31.63	31.63	1605.74
31.64	738.634	31.64	2737.01	1122.7	31.64	31.64	911.39
31.65	211.845	31.65	2824.29	1894.46	31.65	31.65	1243.57
31.66	2374.64	31.66	2377.81	1298.26	31.66	31.66	1195.77
31.67	2323.13	31.67	2248.73	1735.76	31.67	31.67	89.4939
31.68	2445.83	31.68	1709.06	1069.77	31.68	31.68	1202
31.69	1469.15	31.69	1378.32	1300.04	31.69	31.69	1387.2
31.7	3075.2	31.7	1528.52	322.871	31.7	31.7	810.293
31.71	2887.72	31.71	2149.44	1370.2	31.71	31.71	518.741
31.72	98.517	31.72	1871.21	1039.56	31.72	31.72	1665.77
31.73	1953.11	31.73	2573.91	1435.7	31.73	31.73	3245.75
31.74	1639.47	31.74	1207.34	2664.55	31.74	31.74	1951.29
31.75	2530.38	31.75	1815.07	1492.33	31.75	31.75	647.663
31.76	1558.82	31.76	2014.33	1218.6	31.76	31.76	1079.8
31.77	853.804	31.77	2316.61	2701.81	31.77	31.77	-45.1579
31.78	-419.491	31.78	1242.85	1832.16	31.78	31.78	227.642
31.79	1993.43	31.79	1379.75	2438.5	31.79	31.79	785.973
31.8	1872.82	31.8	2101.64	1048.51	31.8	31.8	1173.87
31.81	1141.31	31.81	1414.43	1333.93	31.81	31.81	451.638
31.82	1751.25	31.82	1878.16	1891.41	31.82	31.82	1967.58
31.83	2380.29	31.83	2614.75	855.316	31.83	31.83	1632.3
31.84	1771.69	31.84	3124.7	2116.18	31.84	31.84	1551.79
31.85	1784.93	31.85	1371.3	1610.01	31.85	31.85	656.198
31.86	943.019	31.86	989.285	1411.38	31.86	31.86	1465.71
31.87	39.958	31.87	1636.41	1543.15	31.87	31.87	764.155
31.88	1617.24	31.88	1365.77	1593.63	31.88	31.88	1734.57
31.89	-367.137	31.89	1384.21	1679.36	31.89	31.89	1830.28
31.9	1885.79	31.9	1956.39	1035.9	31.9	31.9	813.119
31.91	-200.846	31.91	2449.22	689.075	31.91	31.91	774.907
31.92	2022.94	31.92	831.165	1313.76	31.92	31.92	1064.12
31.93	922.713	31.93	750.5	1129.06	31.93	31.93	1492.09
31.94	13.0379	31.94	2049.1	2046.33	31.94	31.94	1436.51
31.95	1174.37	31.95	1664.88	2533.43	31.95	31.95	542.103
31.96	1479.1	31.96	644.793	1669.23	31.96	31.96	679.275
31.97	1986.22	31.97	989.05	1969.11	31.97	31.97	477.098
31.98	1941.29	31.98	1397.91	2357.49	31.98	31.98	92.6714
31.99	663.095	31.99	815.133	972.519	31.99	31.99	563.297
32	1861.4	32	1314.02	1193	32	32	948.737
32.01	-282.704	32.01	1596.82	1777.28	32.01	32.01	913.429
32.02	769.698	32.02	945.064	1855.97	32.02	32.02	462.365
32.03	1547.96	32.03	827.713	2364.91	32.03	32.03	1462.9
32.04	1336.65	32.04	2031.96	1360.66	32.04	32.04	1661.1
32.05	1226.73	32.05	1974.79	2407.67	32.05	32.05	754.792
32.06	1760.97	32.06	1324.36	375.843	32.06	32.06	749.21
32.07	1335.65	32.07	1449.1	655.791	32.07	32.07	176.955
32.08	1640.86	32.08	2444.62	816.914	32.08	32.08	643.867
32.09	-17.5641	32.09	2324.27	1801.1	32.09	32.09	1000.78
32.1	594.841	32.1	796.011	2147.17	32.1	32.1	720.753
32.11	1363.8	32.11	244.422	1145.97	32.11	32.11	781.711
32.12	961.955	32.12	1887.79	882.868	32.12	32.12	749.532
32.13	1626.5	32.13	1687.38	1522.29	32.13	32.13	3038.56
32.14	1735.9	32.14	2726.21	836.449	32.14	32.14	1505.64
32.15	1958.45	32.15	369.362	1607.09	32.15	32.15	-76.9757
32.16	1802.87	32.16	1084.89	1973.95	32.16	32.16	295.054
32.17	799.086	32.17	796.733	1947.84	32.17	32.17	129.913
32.18	673.717	32.18	2410.33	2673.57	32.18	32.18	837.141
32.19	879.42	32.19	960.939	2547.45	32.19	32.19	1712.01
32.2	1418.59	32.2	1558.8	926.862	32.2	32.2	934.098
32.21	636.364	32.21	1953.04	1704.08	32.21	32.21	310.011
32.22	1420.55	32.22	1512.37	2242.89	32.22	32.22	1591.3
32.23	1257.45	32.23	1932.91	2207.11	32.23	32.23	1051.68
32.24	166.541	32.24	1941.64	2768.22	32.24	32.24	1082.96
32.25	1643.24	32.25	2924.7	1443.52	32.25	32.25	815.019
32.26	1798.5	32.26	2300.81	1918.19	32.26	32.26	-28.3485
32.27	435.568	32.27	505.438	1267.15	32.27	32.27	1049.54
32.28	1624.94	32.28	1451.9	1103.45	32.28	32.28	1006.68
32.29	633.783	32.29	2191.44	1641.1	32.29	32.29	156.634
32.3	401.549	32.3	1202.82	74.7623	32.3	32.3	1253.11
32.31	1029.08	32.31	1772.12	936.198	32.31	32.31	1543.78
32.32	1168.45	32.32	2201.94	1452.35	32.32	32.32	-95.9479
32.33	877.79	32.33	1403.09	1861.51	32.33	32.33	2304.8
32.34	197.034	32.34	1045.11	687.874	32.34	32.34	1452.32
32.35	667.827	32.35	2053.53	2038.69	32.35	32.35	2326.31
32.36	1817.81	32.36	1115.72	1981.58	32.36	32.36	1300.38
32.37	1918.49	32.37	1223.33	499.456	32.37	32.37	1858.27
32.38	2130.97	32.38	785.194	405.208	32.38	32.38	898.435
32.39	1173.75	32.39	1915.03	1672.74	32.39	32.39	933.593
32.4	1033.43	32.4	1552.21	2593.01	32.4	32.4	-492.759
32.41	2211.7	32.41	2111.07	2137.8	32.41	32.41	165.654
32.42	1452.31	32.42	474.165	1452.76	32.42	32.42	592.466
32.43	915.916	32.43	835.89	1404.06	32.43	32.43	3153.35
32.44	-510.1	32.44	1171.51	1643.34	32.44	32.44	2042.23
32.45	333.821	32.45	1696.77	122.871	32.45	32.45	1369.79
32.46	1299.74	32.46	1083.74	-224.307	32.46	32.46	1351.25
32.47	856.7	32.47	3108.61	1020.49	32.47	32.47	549.663
32.48	381.843	32.48	1253.91	-439.066	32.48	32.48	-352.715
32.49	1600.09	32.49	1236.49	1243.89	32.49	32.49	358.807
32.5	1524.87	32.5	-419.351	2266.67	32.5	32.5	1102.16
32.51	924.08	32.51	276.616	899.053	32.51	32.51	1600.06
32.52	2262.76	32.52	2259.51	-315.986	32.52	32.52	1115.17
32.53	754.55	32.53	2037.72	2092.35	32.53	32.53	1868.2
32.54	576.297	32.54	1194.01	1935.89	32.54	32.54	585.627
32.55	1845.03	32.55	2168.4	1349.15	32.55	32.55	2520.64
32.56	-327.279	32.56	-243.27	1088.84	32.56	32.56	1745.22
32.57	620.588	32.57	389.813	2078.87	32.57	32.57	663.744
32.58	761.238	32.58	1071.12	401.204	32.58	32.58	2154.26
32.59	142.585	32.59	1734.25	535.348	32.59	32.59	2007.55
32.6	1938.92	32.6	1818.46	766.348	32.6	32.6	2360.66
32.61	1575.65	32.61	2203.31	2557.29	32.61	32.61	1720.84
32.62	964.399	32.62	934.422	2369.38	32.62	32.62	1042.57
32.63	2133.87	32.63	3095.12	2039.74	32.63	32.63	2242.56
32.64	423.089	32.64	3054.16	2880.69	32.64	32.64	958.419
32.65	835.5	32.65	988.4	1720.86	32.65	32.65	2910
32.66	1099.31	32.66	444.315	537.653	32.66	32.66	2618.81
32.67	1298.1	32.67	1808.52	1511.17	32.67	32.67	1308.91
32.68	-304.493	32.68	1767.74	1699.65	32.68	32.68	1573.17
32.69	673.39	32.69	2192.64	2559.4	32.69	32.69	1213.84
32.7	2339.63	32.7	1584.54	2149.88	32.7	32.7	1009.56
32.71	1952.63	32.71	824.188	578.008	32.71	32.71	882.65
32.72	1587.68	32.72	2233.07	955.247	32.72	32.72	994.944
32.73	1131.77	32.73	2363.79	2023.6	32.73	32.73	2110.49
32.74	410.47	32.74	2501.1	1234.82	32.74	32.74	972.005
32.75	612.559	32.75	1572.44	1649.72	32.75	32.75	2559.62
32.76	1610	32.76	1056.77	796.715	32.76	32.76	985.316
32.77	1001.24	32.77	2108.07	2631.06	32.77	32.77	1556.25
32.78	2302.27	32.78	1485.5	806.533	32.78	32.78	739.298
32.79	1803.6	32.79	2235.6	994.795	32.79	32.79	1426.8
32.8	2181.92	32.8	2489.5	2233.01	32.8	32.8	1393.24
32.81	689.982	32.81	1796.89	287.62	32.81	32.81	1779.65
32.82	623.145	32.82	1627.36	2401.74	32.82	32.82	230.848
32.83	1020.66	32.83	2785.96	2331.87	32.83	32.83	2093.96
32.84	919.781	32.84	1686.51	1505.09	32.84	32.84	1131.33
32.85	1785.96	32.85	2476.76	1637.06	32.85	32.85	1191.9
32.86	702.517	32.86	2631.15	1010.13	32.86	32.86	2839.55
32.87	1550.78	32.87	1881.08	2048.6	32.87	32.87	1998.76
32.88	809.055	32.88	2730.04	2196.48	32.88	32.88	2479.36
32.89	878.699	32.89	2076.44	1235.63	32.89	32.89	2008.27
32.9	2345.74	32.9	2322.7	1604.1	32.9	32.9	-250.546
32.91	1953.52	32.91	2257.92	858.662	32.91	32.91	324.947
32.92	1887.61	32.92	2402.43	2103.58	32.92	32.92	1961.97
32.93	1394.14	32.93	1698.57	1761.33	32.93	32.93	2202.5
32.94	1728.78	32.94	637.847	2505.83	32.94	32.94	-735.099
32.95	2469.82	32.95	2959.61	3256.94	32.95	32.95	252.253
32.96	2052.52	32.96	1568.48	1363.23	32.96	32.96	281.89
32.97	2244.76	32.97	2065.98	1664.5	32.97	32.97	226.56
32.98	1674.61	32.98	1049.21	1365.69	32.98	32.98	520.181
32.99	2453.02	32.99	2008.85	1161.25	32.99	32.99	212.693
33	1334.26	33	2916.4	2135.48	33	33	1251.39
33.01	-294.898	33.01	859.79	1528.81	33.01	33.01	1765.48
33.02	1848.52	33.02	858.035	1857.98	33.02	33.02	937.852
33.03	2204.18	33.03	931.427	-35.446	33.03	33.03	864.735
33.04	1206.82	33.04	603.537	1763.65	33.04	33.04	46.892
33.05	2219.54	33.05	2145.41	1565.79	33.05	33.05	591.347
33.06	2272.12	33.06	2149.19	1525.43	33.06	33.06	1589.51
33.07	1629.18	33.07	2212.56	722.881	33.07	33.07	1462.59
33.08	632.491	33.08	1512.98	1884.54	33.08	33.08	1905.48
33.09	2838.62	33.09	2553.47	74.9999	33.09	33.09	1442.82
33.1	714.466	33.1	2516.51	899.157	33.1	33.1	182.453
33.11	2073.78	33.11	890.308	1989.82	33.11	33.11	2101.48
33.12	841.27	33.12	2892.62	1529.25	33.12	33.12	3535.73
33.13	1119.19	33.13	2637.2	2698.21	33.13	33.13	1110.89
33.14	1779.18	33.14	1733.45	2135.98	33.14	33.14	1861.26
33.15	2666.19	33.15	2890.21	527.5	33.15	33.15	3506.28
33.16	2677.73	33.16	-207.704	1385.22	33.16	33.16	1503.04
33.17	1399.82	33.17	1459.52	1468.15	33.17	33.17	453.075
33.18	1014.71	33.18	2580.86	1700.42	33.18	33.18	1542.79
33.19	714.526	33.19	2318.01	1906.95	33.19	33.19	1168.01
33.2	1454.66	33.2	2293.39	1766.78	33.2	33.2	1902.81
33.21	1181.13	33.21	3033.54	1331.05	33.21	33.21	1862.78
33.22	1117.49	33.22	2757.76	928.493	33.22	33.22	1952.17
33.23	1587.08	33.23	2460.25	667.669	33.23	33.23	1181.03
33.24	1810.53	33.24	2513.16	1120.08	33.24	33.24	156.454
33.25	1217.26	33.25	4224.02	857.551	33.25	33.25	2160.23
33.26	-325.277	33.26	2452.57	991.76	33.26	33.26	1762.05
33.27	1765.43	33.27	2128.2	1989.6	33.27	33.27	1921.62
33.28	2047.35	33.28	2007.37	858.914	33.28	33.28	932.744
33.29	3109.8	33.29	920.962	2185.98	33.29	33.29	376.229
33.3	2177.13	33.3	418.055	1778.7	33.3	33.3	1310.15
33.31	1014.71	33.31	988.071	949.646	33.31	33.31	1560.67
33.32	900.447	33.32	2299.96	1923.67	33.32	33.32	1874.66
33.33	2233.47	33.33	2337.31	1206.64	33.33	33.33	2123.45
33.34	2689.86	33.34	1863.75	1875.89	33.34	33.34	1168.44
33.35	2025.85	33.35	1807.28	1074.51	33.35	33.35	2065.62
33.36	1526.49	33.36	1848.27	452.443	33.36	33.36	2822.03
33.37	1931.57	33.37	1180.39	1942.06	33.37	33.37	1940.56
33.38	1038.48	33.38	1703.14	1261.72	33.38	33.38	1189.34
33.39	1654.34	33.39	1548.23	827.208	33.39	33.39	307.566
33.4	1593.19	33.4	1263.98	528.162	33.4	33.4	718.151
33.41	2581.85	33.41	1928.99	1167.49	33.41	33.41	2342.2
33.42	1623.08	33.42	3021.87	469.164	33.42	33.42	2234.58
33.43	366.519	33.43	2463.65	163.219	33.43	33.43	1973.34
33.44	2080.25	33.44	3482.21	718.261	33.44	33.44	2869.25
33.45	1117.53	33.45	1122.06	1565.8	33.45	33.45	263.583
33.46	923.842	33.46	2176.18	1934.26	33.46	33.46	156.495
33.47	1088.68	33.47	2390.7	819.921	33.47	33.47	563.3
33.48	724.101	33.48	2344.95	2053.14	33.48	33.48	349.946
33.49	835.267	33.49	1547.47	744.744	33.49	33.49	1099.98
33.5	2430.04	33.5	1369.48	804.392	33.5	33.5	1611.76
33.51	648.957	33.51	2139.93	552.325	33.51	33.51	1768.57
33.52	523.118	33.52	1893.75	-208.545	33.52	33.52	3090.85
33.53	419.349	33.53	1962.74	89.5606	33.53	33.53	1823.55
33.54	1544.3	33.54	2441.33	-5.20541	33.54	33.54	1530.42
33.55	1830.06	33.55	3396.53	1296.8	33.55	33.55	2778.46
33.56	1841.26	33.56	2312.07	961.223	33.56	33.56	2432.25
33.57	791.087	33.57	1897.74	2019.02	33.57	33.57	504.83
33.58	1384.29	33.58	2441.86	1433.04	33.58	33.58	2906.26
33.59	1149.78	33.59	1627.79	1333.74	33.59	33.59	2313.1
33.6	673.26	33.6	733.556	2497.44	33.6	33.6	3622.91
33.61	741.038	33.61	1086.87	502.244	33.61	33.61	1936.28
33.62	1201.02	33.62	2359.88	1927.35	33.62	33.62	1676.92
33.63	818.89	33.63	2037.58	1927.23	33.63	33.63	1268.3
33.64	1716.95	33.64	2512.55	1334.66	33.64	33.64	2385.02
33.65	1798.33	33.65	2355.06	1213.9	33.65	33.65	1512.71
33.66	2270.35	33.66	2865.97	1432.66	33.66	33.66	434.521
33.67	1817.48	33.67	2845.63	2706.89	33.67	33.67	739.282
33.68	1595.92	33.68	1408.91	831.229	33.68	33.68	1356.56
33.69	1614.31	33.69	-357.551	1219.08	33.69	33.69	980.978
33.7	123.085	33.7	1978.9	674.018	33.7	33.7	991.605
33.71	1759.61	33.71	2024.77	2031.61	33.71	33.71	1759.2
33.72	1604.32	33.72	2156.66	1519.36	33.72	33.72	-609.84
33.73	1670.59	33.73	2227.5	787.555	33.73	33.73	1195.93
33.74	1578.13	33.74	1978.45	2380.64	33.74	33.74	1152.65
33.75	1002.54	33.75	2100.27	3193.25	33.75	33.75	727.988
33.76	2185.16	33.76	2343.64	1951.56	33.76	33.76	1183.32
33.77	952.338	33.77	2125.42	1275.94	33.77	33.77	2802.65
33.78	809.158	33.78	2212.85	1755.36	33.78	33.78	2405.7
33.79	1056.82	33.79	3097.21	689.92	33.79	33.79	2574.97
33.8	652.594	33.8	3496.95	1046.28	33.8	33.8	2521.08
33.81	1592.13	33.81	1133.97	1568.84	33.81	33.81	1429.58
33.82	1202.21	33.82	2094.45	1195.26	33.82	33.82	1592.4
33.83	2666.83	33.83	2813.83	891.091	33.83	33.83	1866.21
33.84	1345.65	33.84	1449.49	1063.08	33.84	33.84	293.396
33.85	1571.7	33.85	2443.1	1974.81	33.85	33.85	1293.3
33.86	1452.62	33.86	2347.41	1471.35	33.86	33.86	35.6488
33.87	540.259	33.87	1321.93	1440.1	33.87	33.87	2420.65
33.88	1539.48	33.88	3101.47	1221.43	33.88	33.88	77.5146
33.89	2283.46	33.89	1590.22	1708.88	33.89	33.89	1303.14
33.9	2963.98	33.9	2175.66	2216.14	33.9	33.9	438.843
33.91	2035.83	33.91	2204.11	1025.61	33.91	33.91	1099.14
33.92	1321.33	33.92	2044.11	1073.31	33.92	33.92	2225.89
33.93	1405.92	33.93	1886.92	1284.84	33.93	33.93	791.878
33.94	635.912	33.94	1832.41	1016.45	33.94	33.94	1441.44
33.95	1899.21	33.95	1542.07	227.441	33.95	33.95	2451.31
33.96	1354.64	33.96	1556.13	1340.82	33.96	33.96	913.759
33.97	520.198	33.97	2740.71	1394.77	33.97	33.97	1869.61
33.98	1592.77	33.98	2905.03	813.873	33.98	33.98	1118.41
33.99	1456.2	33.99	1858.18	898.228	33.99	33.99	1309.87
34	1148.49	34	66.5712	719.113	34	34	2013.01
34.01	1331.65	34.01	2321.13	217.257	34.01	34.01	1917.22
34.02	1383.53	34.02	934.95	892.403	34.02	34.02	3069.32
34.03	1261.29	34.03	1681.74	1759.74	34.03	34.03	3865.41
34.04	1956.14	34.04	3064.1	1226.89	34.04	34.04	2719.34
34.05	1017.61	34.05	2363.52	1187.71	34.05	34.05	2865.79
34.06	1056.11	34.06	2311.9	2001.76	34.06	34.06	1304.15
34.07	576.224	34.07	2783.46	1138.83	34.07	34.07	1011.79
34.08	1508.48	34.08	1672.25	494.14	34.08	34.08	3081.15
34.09	2180.14	34.09	1558.85	1627.12	34.09	34.09	1328.38
34.1	1696.33	34.1	1731.7	452.358	34.1	34.1	2783.24
34.11	2192.97	34.11	2698.56	-478.42	34.11	34.11	1414.85
34.12	507.23	34.12	1925.66	1157.85	34.12	34.12	1988.82
34.13	958.705	34.13	2518.55	1000.09	34.13	34.13	1294.03
34.14	934.682	34.14	2689.19	1365.36	34.14	34.14	232.857
34.15	1854.57	34.15	2492.42	1753.18	34.15	34.15	1293.54
34.16	1357.49	34.16	3047.86	2178.41	34.16	34.16	2953.36
34.17	1091.17	34.17	1529.93	1181.74	34.17	34.17	1502.66
34.18	1290.82	34.18	2007.12	1738.21	34.18	34.18	2207.2
34.19	1829.12	34.19	779.719	485.422	34.19	34.19	2088.43
34.2	1516.14	34.2	1950.15	231.906	34.2	34.2	1379.76
34.21	1319.4	34.21	1829.98	1153.41	34.21	34.21	2631.77
34.22	343.21	34.22	1312.78	1571	34.22	34.22	1916.8
34.23	1836.12	34.23	2466.99	127.768	34.23	34.23	1404.04
34.24	958.664	34.24	2576.05	735.484	34.24	34.24	2555.8
34.25	1257.27	34.25	3238.87	1255.05	34.25	34.25	1628.13
34.26	1564.23	34.26	1725.26	1430.97	34.26	34.26	1726.42
34.27	540.701	34.27	2200.82	1060.52	34.27	34.27	1897.46
34.28	317.365	34.28	2565.25	790.422	34.28	34.28	568.128
34.29	-203.907	34.29	1811.63	1758.19	34.29	34.29	1549.1
34.3	358.659	34.3	1613.92	911.007	34.3	34.3	395.051
34.31	1377.12	34.31	1094.03	946.37	34.31	34.31	1509.25
34.32	706.86	34.32	1575.95	1372.89	34.32	34.32	1292.31
34.33	-252.247	34.33	625.111	1485.95	34.33	34.33	2221.49
34.34	215.872	34.34	1758.07	502.214	34.34	34.34	2244.84
34.35	426.351	34.35	2444.47	2150.85	34.35	34.35	1939.63
34.36	356.28	34.36	3440.06	988.995	34.36	34.36	2497.76
34.37	-145.076	34.37	1828.56	14.6079	34.37	34.37	1547.41
34.38	702.122	34.38	975.308	1310.47	34.38	34.38	-134.483
34.39	1730.1	34.39	476.423	154.285	34.39	34.39	-207.348
34.4	1218.22	34.4	1056.29	479.508	34.4	34.4	1382.45
34.41	1348.21	34.41	1798.05	1183.48	34.41	34.41	1967.13
34.42	472.952	34.42	795.294	647.369	34.42	34.42	2395.63
34.43	1245.3	34.43	668.154	1212.47	34.43	34.43	1174.66
34.44	507.276	34.44	1921.2	397.548	34.44	34.44	1787.06
34.45	1964.97	34.45	1341.93	1075.58	34.45	34.45	636.344
34.46	745.653	34.46	2298.9	1504.54	34.46	34.46	1721.68
34.47	526.008	34.47	2776.8	1308.22	34.47	34.47	1873.06
34.48	1093.94	34.48	2264.46	1211.87	34.48	34.48	1514.65
34.49	1196.04	34.49	992.043	915.286	34.49	34.49	1529.77
34.5	1129.63	34.5	2069.08	333.517	34.5	34.5	2102.22
34.51	1652.49	34.51	1609.07	1314.23	34.51	34.51	1784.18
34.52	1052.33	34.52	1949.17	854.591	34.52	34.52	593.225
34.53	1767.05	34.53	770.764	1019.52	34.53	34.53	1647.78
34.54	1586.68	34.54	1593.22	1272.39	34.54	34.54	2683.97
34.55	2148.03	34.55	2248.87	829.393	34.55	34.55	2880.88
34.56	1537.97	34.56	1625.97	1391.82	34.56	34.56	709.651
34.57	259.642	34.57	1492.46	307.372	34.57	34.57	800.654
34.58	1764.92	34.58	2332.46	2122.56	34.58	34.58	1969.94
34.59	1598.87	34.59	1605.72	1745.69	34.59	34.59	786.064
34.6	1224.6	34.6	2069.51	1596.6	34.6	34.6	661.715
34.61	1043.51	34.61	2251.02	2059.95	34.61	34.61	3004.71
34.62	1226.16	34.62	1139.44	2496.1	34.62	34.62	1240.09
34.63	1625.03	34.63	2530.59	1055.74	34.63	34.63	-29.1509
34.64	785.526	34.64	1205.73	1357.84	34.64	34.64	1640.89
34.65	1220.52	34.65	1520.14	1647.03	34.65	34.65	2783.27
34.66	1651.24	34.66	1253.41	795.263	34.66	34.66	2562.92
34.67	881.401	34.67	1553.38	1152.36	34.67	34.67	1480.59
34.68	235.187	34.68	353.863	1586.88	34.68	34.68	1759.68
34.69	-479.679	34.69	1485.5	1933.24	34.69	34.69	1452.61
34.7	106.806	34.7	1092.91	618.439	34.7	34.7	1238.98
34.71	297.497	34.71	1607.56	1560.88	34.71	34.71	2279.23
34.72	1142.24	34.72	1085.01	566.57	34.72	34.72	711.669
34.73	1290.27	34.73	1405.93	608.102	34.73	34.73	2386.77
34.74	527.171	34.74	2911.75	1162.85	34.74	34.74	1265.39
34.75	1188.81	34.75	827.884	207.805	34.75	34.75	1362.17
34.76	707.875	34.76	1850.4	2631.07	34.76	34.76	1205.73
34.77	850.781	34.77	562.334	458.667	34.77	34.77	801.858
34.78	740.502	34.78	1452.44	229.043	34.78	34.78	440.419
34.79	1003.03	34.79	1880.48	517.59	34.79	34.79	2485.65
34.8	1568.02	34.8	1443.14	2274.17	34.8	34.8	1826.68
34.81	534.772	34.81	1596.43	2013.75	34.81	34.81	1223.95
34.82	488.311	34.82	2346.37	1383.67	34.82	34.82	2324.25
34.83	548.61	34.83	1031.72	1566.72	34.83	34.83	2780.73
34.84	1898.34	34.84	1461.65	2557.16	34.84	34.84	1571.33
34.85	1883.93	34.85	1643.85	1164.81	34.85	34.85	1296.42
34.86	687.591	34.86	1512.46	119.878	34.86	34.86	1795.59
34.87	1343.27	34.87	2346.29	1080.5	34.87	34.87	2570.97
34.88	963.184	34.88	1720.45	1987.9	34.88	34.88	2207.05
34.89	-612.848	34.89	1473.11	1987.89	34.89	34.89	2265.34
34.9	-617.962	34.9	977.025	1776.53	34.9	34.9	1558.84
34.91	2729.38	34.91	1972.88	1365.6	34.91	34.91	2086.79
34.92	964.147	34.92	1397.54	692.654	34.92	34.92	1152.54
34.93	200.576	34.93	839.015	-51.7747	34.93	34.93	1380.99
34.94	1150.96	34.94	1758.3	928.699	34.94	34.94	1215.14
34.95	1754.51	34.95	2295.64	384.68	34.95	34.95	720.009
34.96	607.165	34.96	2066.35	2067.19	34.96	34.96	1658
34.97	-362.552	34.97	1854.16	879.989	34.97	34.97	1149.21
[truncated: 4,803 more rows]

## Sheet: FIGURE 3(b)
FIGURE 3(b)
2 Theta (degree)	Intensity (a.u.)	2 Theta (degree)	Intensity (a.u.)	2 Theta (degree)	Intensity (a.u.)	2 Theta (degree)	Intensity (a.u.)
15	681.17	15	426.32	15	1736.73	15	2498.01
15.01	306.508	15.01	867.259	15.01	968.657	15.01	1191.59
15.02	1207.21	15.02	927.889	15.02	255.322	15.02	459.291
15.03	-241.259	15.03	1632.22	15.03	1222.07	15.03	1000.74
15.04	1388.98	15.04	1098.57	15.04	1303.06	15.04	1011.59
15.05	638.936	15.05	1178.69	15.05	780.65	15.05	1848.59
15.06	332.155	15.06	1489.99	15.06	958.575	15.06	2591.25
15.07	1772.9	15.07	56.2661	15.07	1702.58	15.07	1223.46
15.08	1274.75	15.08	1135.39	15.08	1149.82	15.08	3007.52
15.09	704.303	15.09	906.344	15.09	674.594	15.09	1568.12
15.1	-285.199	15.1	336.066	15.1	329.933	15.1	1662.51
15.11	531.315	15.11	756.442	15.11	2138.23	15.11	1528.69
15.12	83.3395	15.12	1044.89	15.12	216.267	15.12	1661.82
15.13	1653.1	15.13	1241.82	15.13	266.919	15.13	1326.75
15.14	1571.56	15.14	1539.07	15.14	1074.07	15.14	1589.52
15.15	1769.67	15.15	289.967	15.15	-173.551	15.15	1703.98
15.16	121.506	15.16	-81.4733	15.16	597.547	15.16	1113.64
15.17	204.345	15.17	1125.8	15.17	301.168	15.17	908.475
15.18	2011.41	15.18	1261.62	15.18	991.895	15.18	2964.46
15.19	1358.02	15.19	1127.78	15.19	787.693	15.19	2786.31
15.2	1854.11	15.2	601.701	15.2	1474.24	15.2	432.801
15.21	1347.21	15.21	184.355	15.21	574.316	15.21	-96.7267
15.22	1029.13	15.22	1371.6	15.22	1638.63	15.22	2269.22
15.23	943.14	15.23	919.866	15.23	1463.27	15.23	2124.45
15.24	1519.24	15.24	1188.38	15.24	990.499	15.24	2114.33
15.25	-4.90735	15.25	132.389	15.25	723.556	15.25	2341.08
15.26	693.234	15.26	917.156	15.26	1082.9	15.26	1342.98
15.27	231.31	15.27	1803.39	15.27	1564.83	15.27	2948.19
15.28	1137.5	15.28	941.636	15.28	2211.58	15.28	2147.61
15.29	1276.63	15.29	119.762	15.29	1336.09	15.29	1267.27
15.3	778.26	15.3	1142.82	15.3	947.814	15.3	554.918
15.31	1352.12	15.31	1097	15.31	1025.33	15.31	1459.92
15.32	1158.18	15.32	1156.44	15.32	578.518	15.32	2040.5
15.33	584.073	15.33	1013.69	15.33	260.983	15.33	1569.03
15.34	362.383	15.34	875.802	15.34	1261.24	15.34	695.758
15.35	1874.11	15.35	-580.752	15.35	772.752	15.35	1530.5
15.36	1568.43	15.36	132.27	15.36	1021.14	15.36	1745.72
15.37	562.093	15.37	1658.53	15.37	1661.8	15.37	2981.74
15.38	783.672	15.38	1515.18	15.38	308.851	15.38	2107.44
15.39	1510.54	15.39	1974.26	15.39	754.707	15.39	3044.53
15.4	383.089	15.4	1418.28	15.4	1187.05	15.4	3135.19
15.41	1467.94	15.41	1299.43	15.41	256.551	15.41	1539.28
15.42	1607.92	15.42	1238.51	15.42	840.272	15.42	2841.29
15.43	1063.58	15.43	14.2836	15.43	1137.55	15.43	1644.7
15.44	771.741	15.44	262.098	15.44	1541.65	15.44	1276.6
15.45	770.39	15.45	651.676	15.45	2286.3	15.45	555.056
15.46	1579.27	15.46	769.152	15.46	968.575	15.46	1917.45
15.47	882.542	15.47	2011.96	15.47	2407.85	15.47	2770.67
15.48	677.034	15.48	304.22	15.48	1326.35	15.48	3167.91
15.49	1016.53	15.49	273.428	15.49	-117.315	15.49	932.087
15.5	1207.54	15.5	877.641	15.5	1131.15	15.5	2171
15.51	760.692	15.51	1156.22	15.51	371.196	15.51	2431.07
15.52	-137.755	15.52	792.583	15.52	664.341	15.52	3309.88
15.53	1062.18	15.53	1364.43	15.53	1529.14	15.53	2249.42
15.54	539.933	15.54	1078.07	15.54	2027.65	15.54	2681.2
15.55	463.69	15.55	2096.96	15.55	1661.23	15.55	2673.81
15.56	329.748	15.56	1036.97	15.56	2301.93	15.56	2627.19
15.57	1956.59	15.57	1302.64	15.57	886.932	15.57	1688.64
15.58	1576.68	15.58	265.008	15.58	1147.11	15.58	2161.74
15.59	509.292	15.59	117.252	15.59	2152.35	15.59	218.445
15.6	337.439	15.6	1654.72	15.6	1855.22	15.6	1303.32
15.61	1082.58	15.61	1393.19	15.61	2092.97	15.61	2077.29
15.62	-17.9547	15.62	479.448	15.62	1337.1	15.62	2132.51
15.63	1277.46	15.63	2034.03	15.63	1593.8	15.63	2236.02
15.64	919.936	15.64	853.123	15.64	1388.22	15.64	985.854
15.65	935.538	15.65	675.172	15.65	1511.69	15.65	634.588
15.66	490.792	15.66	585.386	15.66	1560.84	15.66	1687.77
15.67	620.821	15.67	1698.68	15.67	2084.9	15.67	1333.22
15.68	282.377	15.68	1271.36	15.68	1571.35	15.68	1038.5
15.69	778.913	15.69	-72.2201	15.69	716.701	15.69	1379.86
15.7	749.086	15.7	381.678	15.7	1899.93	15.7	905.188
15.71	263.024	15.71	-69.948	15.71	2012.34	15.71	1558.83
15.72	1084.89	15.72	611.613	15.72	1708.53	15.72	697.15
15.73	204.886	15.73	302.819	15.73	1495.13	15.73	2195.86
15.74	344.938	15.74	826.362	15.74	1089.38	15.74	941.923
15.75	-291.394	15.75	1588.5	15.75	1026.57	15.75	1887.57
15.76	1214.27	15.76	1376.84	15.76	698.079	15.76	1795.74
15.77	1353.87	15.77	-98.6069	15.77	1482.8	15.77	2056.13
15.78	177.135	15.78	2062.02	15.78	2130.24	15.78	2134.65
15.79	-422.37	15.79	1787.23	15.79	858.683	15.79	1387.77
15.8	-679.75	15.8	2183.97	15.8	702.994	15.8	671.676
15.81	927.45	15.81	1111.47	15.81	539.824	15.81	1648.1
15.82	670.962	15.82	576.219	15.82	91.2469	15.82	1384.5
15.83	2065.64	15.83	1009	15.83	1745.38	15.83	1526.82
15.84	516.822	15.84	1813.22	15.84	1587.28	15.84	1406.42
15.85	276.486	15.85	1245.9	15.85	1157.64	15.85	2591.55
15.86	504.191	15.86	1187.68	15.86	856.611	15.86	2199.3
15.87	862.993	15.87	1820.81	15.87	1191.48	15.87	2007.92
15.88	116.639	15.88	1961.61	15.88	368.376	15.88	915.155
15.89	538.061	15.89	315.252	15.89	-114.637	15.89	2232.46
15.9	967.967	15.9	1787.78	15.9	354.422	15.9	1880.33
15.91	76.6387	15.91	782.159	15.91	1049.12	15.91	1161.3
15.92	484.731	15.92	750.421	15.92	2120.92	15.92	1929.17
15.93	582.091	15.93	742.498	15.93	1556.9	15.93	1612.27
15.94	1046.89	15.94	-221.594	15.94	784.181	15.94	1782.91
15.95	307.595	15.95	1653.76	15.95	1764.89	15.95	669.332
15.96	253.487	15.96	1689.65	15.96	1678.87	15.96	1956.75
15.97	-350.722	15.97	376.348	15.97	467.578	15.97	814.838
15.98	108.077	15.98	1095.44	15.98	556.8	15.98	1868.49
15.99	282.504	15.99	502.408	15.99	1791.91	15.99	2729.38
16	1319.11	16	1840.23	16	1985.68	16	2008.86
16.01	400.235	16.01	360.445	16.01	956.434	16.01	1367.44
16.02	354.154	16.02	1658.04	16.02	1565.99	16.02	1030.18
16.03	-356.93	16.03	1021.46	16.03	2269.71	16.03	1720.1
16.04	709.238	16.04	1001.87	16.04	1063.59	16.04	1724.15
16.05	-375.801	16.05	597.528	16.05	1778.28	16.05	2060.3
16.06	897.461	16.06	1716.4	16.06	979.608	16.06	2671.12
16.07	258.724	16.07	1709.67	16.07	1870.13	16.07	749.294
16.08	628.05	16.08	1019.35	16.08	1152.75	16.08	1188.49
16.09	73.7331	16.09	1797.37	16.09	2366.98	16.09	1843.16
16.1	77.5645	16.1	1799.3	16.1	749.448	16.1	1861.17
16.11	753.023	16.11	1279.06	16.11	2678.01	16.11	1977.33
16.12	1139.21	16.12	1028.19	16.12	318.508	16.12	1065.56
16.13	330.761	16.13	755.127	16.13	1452.87	16.13	2532.44
16.14	745.871	16.14	1659.92	16.14	1712.61	16.14	1751.73
16.15	1528	16.15	1652.02	16.15	195.411	16.15	1164.14
16.16	26.0566	16.16	843.105	16.16	1085.85	16.16	1151.33
16.17	-59.8223	16.17	-765.437	16.17	1658.34	16.17	414.473
16.18	733.286	16.18	1042.42	16.18	1656.66	16.18	2085.32
16.19	438.706	16.19	1157.76	16.19	396.667	16.19	986.516
16.2	-635.474	16.2	1425.94	16.2	1238.88	16.2	1398.68
16.21	698.052	16.21	1337.13	16.21	1563.12	16.21	1819.17
16.22	1061.09	16.22	1288.6	16.22	8.02915	16.22	1460.39
16.23	160.05	16.23	1407.25	16.23	2049.15	16.23	1334.54
16.24	374.426	16.24	1708.46	16.24	2797.31	16.24	3128.54
16.25	735.986	16.25	1930.11	16.25	2556.29	16.25	1523.95
16.26	673.597	16.26	1132.56	16.26	2663.55	16.26	314.302
16.27	916.791	16.27	1444.38	16.27	1127.93	16.27	2153.23
16.28	784.75	16.28	1585.2	16.28	1590.77	16.28	1912.56
16.29	-954.332	16.29	2278.41	16.29	1869.81	16.29	1327.62
16.3	1270.78	16.3	2037.17	16.3	1264.53	16.3	1329.48
16.31	721.883	16.31	1055.93	16.31	955.974	16.31	2705.86
16.32	529.403	16.32	1065.02	16.32	3005.6	16.32	2924.9
16.33	92.9973	16.33	1695.9	16.33	1346.52	16.33	599.767
16.34	1442.53	16.34	140.416	16.34	1389.61	16.34	871.79
16.35	220.088	16.35	568.589	16.35	2195.2	16.35	2911.83
16.36	1413.03	16.36	1408.7	16.36	2308.87	16.36	1442.15
16.37	1712.8	16.37	2025.34	16.37	1831.23	16.37	2729.95
16.38	1311.78	16.38	1677.78	16.38	2798.31	16.38	996.263
16.39	863.719	16.39	2294.57	16.39	1282.91	16.39	1304.87
16.4	1200.9	16.4	130.122	16.4	1551.02	16.4	1278.2
16.41	871.282	16.41	1631.47	16.41	1519.56	16.41	847.35
16.42	1002.36	16.42	1677.7	16.42	698.605	16.42	2610.39
16.43	274.199	16.43	361.169	16.43	694.419	16.43	2226.08
16.44	26.0777	16.44	1346.07	16.44	1119.74	16.44	1318.03
16.45	609.047	16.45	1647.23	16.45	1832.45	16.45	2500.14
16.46	424.64	16.46	1434.36	16.46	1542.99	16.46	3038.97
16.47	1158.34	16.47	656.152	16.47	1625.52	16.47	1716.38
16.48	1007.97	16.48	919.039	16.48	1406.2	16.48	825.341
16.49	1172.87	16.49	864.612	16.49	1322.88	16.49	1145.8
16.5	132.584	16.5	1540.78	16.5	1551.27	16.5	1420.64
16.51	1688.54	16.51	1472.44	16.51	1647.04	16.51	2093.99
16.52	994.085	16.52	1253.82	16.52	1393.2	16.52	1639.66
16.53	1040.65	16.53	1552.63	16.53	1850.23	16.53	1760.21
16.54	1506.74	16.54	1357.9	16.54	2214.84	16.54	2557.47
16.55	863.452	16.55	1469.01	16.55	814.313	16.55	812.805
16.56	-94.139	16.56	1451.98	16.56	1107.96	16.56	466.846
16.57	1010.98	16.57	569.871	16.57	322.741	16.57	303.009
16.58	-294.119	16.58	882.875	16.58	1165.64	16.58	396.36
16.59	-213.399	16.59	779.144	16.59	1011.79	16.59	1626.64
16.6	1160.55	16.6	1853.98	16.6	1563.7	16.6	633.051
16.61	389.662	16.61	713.828	16.61	864.93	16.61	1284.71
16.62	318.402	16.62	74.697	16.62	1269.88	16.62	2173.68
16.63	1182.81	16.63	1572.84	16.63	1100.81	16.63	1347.07
16.64	1065.62	16.64	1003.48	16.64	3133.88	16.64	1956.37
16.65	617.948	16.65	759.664	16.65	1880.9	16.65	2113.96
16.66	588.355	16.66	1219.59	16.66	2009.18	16.66	1447.47
16.67	410.865	16.67	1111.68	16.67	-162.434	16.67	1065.66
16.68	131.422	16.68	994.23	16.68	1920.25	16.68	862.863
16.69	1146.53	16.69	1813.58	16.69	1780.36	16.69	1728.18
16.7	978.096	16.7	1113.17	16.7	1378.93	16.7	1921.76
16.71	1274.68	16.71	1320.28	16.71	786.988	16.71	3023.25
16.72	541.023	16.72	1711.08	16.72	2293.42	16.72	746.19
16.73	933.149	16.73	2258.68	16.73	2061.41	16.73	1810.59
16.74	1328.27	16.74	1211.36	16.74	1781.73	16.74	1298.9
16.75	1669.75	16.75	1129.4	16.75	2810.26	16.75	2954.48
16.76	-66.8072	16.76	1246.61	16.76	1738.52	16.76	1205.69
16.77	824.443	16.77	1030.1	16.77	520.655	16.77	2201.87
16.78	973.099	16.78	1972.5	16.78	1488.53	16.78	2059.36
16.79	1121.56	16.79	1562.16	16.79	-808.507	16.79	274.706
16.8	1272.58	16.8	1688.1	16.8	931.893	16.8	469.508
16.81	940.535	16.81	1236.12	16.81	2110.66	16.81	1410.73
16.82	1755.5	16.82	1635.41	16.82	1621.34	16.82	1846.19
16.83	885.409	16.83	1019.62	16.83	1886.86	16.83	2546.74
16.84	54.8495	16.84	387.154	16.84	1187.12	16.84	926.478
16.85	960.693	16.85	1770.45	16.85	2535.72	16.85	1639.62
16.86	1338.21	16.86	1633.25	16.86	1664.83	16.86	1858.29
16.87	1612.73	16.87	1665.4	16.87	975.203	16.87	2662.63
16.88	1376.5	16.88	2120.74	16.88	1275.56	16.88	1401.43
16.89	1055.93	16.89	1482.89	16.89	2161.7	16.89	2282.75
16.9	994.744	16.9	827.231	16.9	1089.81	16.9	1232.06
16.91	917.831	16.91	1977.11	16.91	947.623	16.91	1943.78
16.92	844.452	16.92	1527.96	16.92	1366.3	16.92	2234.34
16.93	1375.1	16.93	2459.21	16.93	1037.75	16.93	2012.7
16.94	172.672	16.94	1160.27	16.94	1129.44	16.94	1746.36
16.95	463.353	16.95	1698.2	16.95	922.537	16.95	1370.07
16.96	1041.66	16.96	1621.33	16.96	210.044	16.96	2315.61
16.97	763.172	16.97	869.986	16.97	1133.04	16.97	2529.11
16.98	1296.73	16.98	1449.39	16.98	1882.84	16.98	1059.43
16.99	1930.29	16.99	1583.88	16.99	180.718	16.99	1025.55
17	1567.25	17	1428.48	17	1412.78	17	1533.63
17.01	630.696	17.01	1390.5	17.01	818.076	17.01	1567.6
17.02	1856.98	17.02	1899.7	17.02	510.173	17.02	2495.23
17.03	483.916	17.03	1397.53	17.03	1269.31	17.03	2102.65
17.04	420.795	17.04	2291.23	17.04	1348.28	17.04	1058.52
17.05	1145.31	17.05	2135.11	17.05	1854.8	17.05	1783.59
17.06	1015.71	17.06	1663.38	17.06	1488.88	17.06	1926.65
17.07	279.022	17.07	1462.02	17.07	1967.05	17.07	239.947
17.08	607.375	17.08	1286.96	17.08	59.8049	17.08	1390.9
17.09	1421.42	17.09	1179.61	17.09	779.379	17.09	-207.587
17.1	1327.2	17.1	987.991	17.1	1916.78	17.1	410.174
17.11	2037.01	17.11	1168.77	17.11	3231.06	17.11	2014.7
17.12	955.638	17.12	1034.71	17.12	2704.6	17.12	1061.58
17.13	1117.66	17.13	1896.16	17.13	971.382	17.13	2244.01
17.14	239.584	17.14	1287.13	17.14	1784.39	17.14	3034.49
17.15	1128.01	17.15	1381.08	17.15	1739.64	17.15	1282.87
17.16	234.904	17.16	2631.35	17.16	470.771	17.16	1648.65
17.17	379.865	17.17	1906.55	17.17	1703.34	17.17	1751.33
17.18	315.875	17.18	1881.64	17.18	882.721	17.18	3211.47
17.19	1191.22	17.19	2102.27	17.19	1524.48	17.19	2007.14
17.2	478.314	17.2	710.981	17.2	1585.86	17.2	1703.76
17.21	1715.12	17.21	985.509	17.21	1295.23	17.21	522.31
17.22	1538.25	17.22	1319.34	17.22	965.685	17.22	1159.41
17.23	1799.15	17.23	2638	17.23	641.603	17.23	1843.35
17.24	909.253	17.24	2737.8	17.24	1627.31	17.24	1535.48
17.25	1464.29	17.25	1326.83	17.25	1164.36	17.25	-519.223
17.26	795.862	17.26	1797.6	17.26	1740.97	17.26	2266.6
17.27	2047.21	17.27	1820.11	17.27	1129.79	17.27	1950.97
17.28	1235.19	17.28	2129.1	17.28	1366.71	17.28	2231.57
17.29	208.552	17.29	1310.22	17.29	520.739	17.29	902.2
17.3	437.296	17.3	831.758	17.3	2629.76	17.3	1645.03
17.31	1273.12	17.31	1430.98	17.31	590.297	17.31	1344.13
17.32	1383.1	17.32	432.894	17.32	1071.01	17.32	914.179
17.33	329.269	17.33	-201.922	17.33	1182.98	17.33	1303.76
17.34	1301.98	17.34	1357.79	17.34	1650.57	17.34	1450.64
17.35	13.2252	17.35	348.994	17.35	1588.52	17.35	1922.73
17.36	1822.66	17.36	1760.26	17.36	1959.59	17.36	426.077
17.37	925.645	17.37	1033.66	17.37	1800.05	17.37	1887.11
17.38	-227.129	17.38	152.579	17.38	1022.38	17.38	849.259
17.39	380.199	17.39	2672.5	17.39	1330.43	17.39	770.205
17.4	1215.28	17.4	1423.11	17.4	552.901	17.4	2009.24
17.41	970.575	17.41	2495.4	17.41	1480.93	17.41	3133.9
17.42	923.303	17.42	1395.93	17.42	1228.06	17.42	2151.17
17.43	951.314	17.43	1633.49	17.43	-112.837	17.43	2649.35
17.44	1122.1	17.44	1412.02	17.44	471.607	17.44	2350.25
17.45	70.8591	17.45	1125.92	17.45	624.683	17.45	1324.38
17.46	868.161	17.46	206.796	17.46	1433.35	17.46	928.063
17.47	709.506	17.47	357.943	17.47	2497.8	17.47	991.48
17.48	439.526	17.48	1192.61	17.48	2720.51	17.48	2130.68
17.49	951.359	17.49	2313.86	17.49	2204.03	17.49	-130.883
17.5	2408.6	17.5	889.895	17.5	791.426	17.5	606.766
17.51	1534.49	17.51	2096.32	17.51	1564.84	17.51	748.424
17.52	369.518	17.52	1627.38	17.52	1719.5	17.52	1792.66
17.53	350.175	17.53	1950.09	17.53	891.772	17.53	2417.22
17.54	129.053	17.54	1707.85	17.54	1400.71	17.54	1319.5
17.55	536.95	17.55	882.242	17.55	1116.91	17.55	588.556
17.56	1139.28	17.56	1873.12	17.56	961.35	17.56	2101.24
17.57	215.854	17.57	998.319	17.57	1372.18	17.57	1676.5
17.58	1835.5	17.58	197.569	17.58	1750.95	17.58	2484.75
17.59	1687.55	17.59	226.197	17.59	886.488	17.59	2655.86
17.6	401.047	17.6	2225.9	17.6	1788.14	17.6	111.928
17.61	1585.69	17.61	345.93	17.61	1009.52	17.61	528.265
17.62	935.879	17.62	177.303	17.62	1329.89	17.62	1362.55
17.63	1567.14	17.63	1931.18	17.63	1776.71	17.63	890.615
17.64	1204.45	17.64	1246.64	17.64	1006.57	17.64	1038.83
17.65	418.168	17.65	-374.701	17.65	1607.93	17.65	1909.02
17.66	-310.878	17.66	1172.86	17.66	1254.37	17.66	1425.55
17.67	822.166	17.67	1269.74	17.67	139.225	17.67	1960.44
17.68	908.349	17.68	817.668	17.68	1604.42	17.68	2901.95
17.69	788.329	17.69	1278.63	17.69	1828.52	17.69	1502.29
17.7	593.385	17.7	2520.76	17.7	2039.86	17.7	1457.49
17.71	1159.46	17.71	2071.43	17.71	1754	17.71	893.567
17.72	2390.88	17.72	1622.31	17.72	1118.89	17.72	783.146
17.73	1826.07	17.73	1176.01	17.73	1696.78	17.73	164.798
17.74	1120.96	17.74	1477.23	17.74	1312.65	17.74	2323.6
17.75	2393.4	17.75	799.422	17.75	2378.34	17.75	2120.94
17.76	846.099	17.76	1362.3	17.76	1977.51	17.76	2118.37
17.77	1455.43	17.77	1539.02	17.77	1246.42	17.77	1102.43
17.78	-160.443	17.78	945.71	17.78	1336.45	17.78	1878.59
17.79	627.838	17.79	1977.5	17.79	2008.45	17.79	2691.61
17.8	1932.66	17.8	1823.35	17.8	2558.41	17.8	2206.35
17.81	1566.76	17.81	1697.96	17.81	2136.26	17.81	1710.99
17.82	771.404	17.82	1622.45	17.82	1652.74	17.82	2166.95
17.83	861.938	17.83	1453.91	17.83	2166.51	17.83	1348.28
17.84	112.821	17.84	1044.65	17.84	1239.41	17.84	2746.61
17.85	295.022	17.85	1092.1	17.85	1024.55	17.85	2039.23
17.86	739.111	17.86	1345.28	17.86	2181.05	17.86	1571.16
17.87	306.702	17.87	-71.6281	17.87	488.212	17.87	2135.53
17.88	1463.5	17.88	-556.268	17.88	1348.17	17.88	369.521
17.89	794.506	17.89	-209.072	17.89	764.521	17.89	2532.06
17.9	1674.99	17.9	1145.95	17.9	1927.67	17.9	97.4221
17.91	1706.9	17.91	1304.73	17.91	530.508	17.91	1446.5
17.92	2317.87	17.92	1962.22	17.92	1017.78	17.92	1165.35
17.93	1694.51	17.93	699.323	17.93	1276.65	17.93	2313.91
17.94	2246.08	17.94	1241.96	17.94	157.609	17.94	2656.47
17.95	1811.57	17.95	1771.84	17.95	942.326	17.95	2162.5
17.96	2373.02	17.96	1820.95	17.96	1791.16	17.96	2557.57
17.97	1313.36	17.97	522.465	17.97	-312.123	17.97	694.701
17.98	951.12	17.98	671.145	17.98	2059.67	17.98	1453.49
17.99	1708.74	17.99	991.573	17.99	815.166	17.99	1076.81
18	1293.73	18	811.263	18	1829.03	18	1842.08
18.01	186.746	18.01	585.151	18.01	2618.49	18.01	1968.23
18.02	251.708	18.02	925.156	18.02	2112.5	18.02	1390.13
18.03	853.974	18.03	1477.74	18.03	533.894	18.03	2342.94
18.04	2126.6	18.04	1883.71	18.04	1674.51	18.04	2799.9
18.05	2360.56	18.05	303.426	18.05	487.503	18.05	1457.29
18.06	967.67	18.06	578.382	18.06	2134.48	18.06	480.776
18.07	1645.4	18.07	2180.17	18.07	2004.05	18.07	1744.98
18.08	129.178	18.08	389.88	18.08	1672.83	18.08	1665.27
18.09	801.684	18.09	300.673	18.09	907.094	18.09	2586.15
18.1	1318.64	18.1	1711.37	18.1	852.112	18.1	1587.53
18.11	759.41	18.11	941.891	18.11	649.442	18.11	1807.47
18.12	385.659	18.12	982.94	18.12	950.899	18.12	1330.02
18.13	2259.09	18.13	1851.67	18.13	1183.02	18.13	1511.73
18.14	1395.45	18.14	477.501	18.14	900.834	18.14	2857.92
18.15	396.957	18.15	862.604	18.15	1151	18.15	2833.81
18.16	540.227	18.16	808.029	18.16	1189.14	18.16	3524.59
18.17	1765.75	18.17	636.169	18.17	484.704	18.17	2523.23
18.18	2101.6	18.18	-80.685	18.18	680.145	18.18	1358.72
18.19	729.861	18.19	1971.34	18.19	63.0477	18.19	772.66
18.2	1260.83	18.2	604.957	18.2	427.34	18.2	1489.95
18.21	1041.38	18.21	459.47	18.21	818.8	18.21	701.505
18.22	1159.38	18.22	603.03	18.22	772.995	18.22	1471.79
18.23	1258.4	18.23	1608.59	18.23	1129.85	18.23	1047.98
18.24	1807.36	18.24	2010.87	18.24	1065.32	18.24	2018.51
18.25	1064.77	18.25	211.661	18.25	487.594	18.25	2766.26
18.26	992.498	18.26	733.834	18.26	1199.43	18.26	3850.1
18.27	1708.62	18.27	828.419	18.27	774.622	18.27	2977.68
18.28	1815.84	18.28	1070.24	18.28	64.3313	18.28	2125.21
18.29	1273.06	18.29	878.768	18.29	866.475	18.29	2358.45
18.3	1203.79	18.3	438.734	18.3	747.19	18.3	863.691
18.31	930.987	18.31	207.115	18.31	1510.7	18.31	1191.78
18.32	1585.48	18.32	1581.32	18.32	-101.875	18.32	1449.85
18.33	429.906	18.33	1530.54	18.33	1268.53	18.33	2357.36
18.34	1327.11	18.34	-353.202	18.34	1063.43	18.34	2426.11
18.35	824.526	18.35	762.223	18.35	2645.3	18.35	2549.16
18.36	2239.4	18.36	1379.65	18.36	1264.8	18.36	1896.01
18.37	1681.22	18.37	970.751	18.37	1051.35	18.37	1993.52
18.38	1898.23	18.38	1842.55	18.38	271.206	18.38	3176.41
18.39	2207.91	18.39	1082.44	18.39	1314.69	18.39	1617.17
18.4	1657.83	18.4	1801.15	18.4	952.017	18.4	869.833
18.41	1410.96	18.41	1236.36	18.41	1188.62	18.41	2389.99
18.42	548.035	18.42	-293.179	18.42	1630.97	18.42	2552.44
18.43	1912.78	18.43	-781.871	18.43	1893.4	18.43	3744.29
18.44	1055.91	18.44	506.873	18.44	2137.92	18.44	3099.57
18.45	-8.03098	18.45	299.024	18.45	-120.561	18.45	2262.08
18.46	353.953	18.46	369.636	18.46	1400.69	18.46	3112.8
18.47	2010.67	18.47	833.748	18.47	671.519	18.47	1513.18
18.48	1059.21	18.48	658.826	18.48	-239.074	18.48	2311.74
18.49	844.626	18.49	-187.343	18.49	378.87	18.49	1564.37
18.5	1494.96	18.5	790.148	18.5	581.958	18.5	1936.19
18.51	1641.29	18.51	1161.8	18.51	1419.31	18.51	2830.83
18.52	997.558	18.52	1820.67	18.52	1401.6	18.52	1218.91
18.53	228.849	18.53	601.408	18.53	229.161	18.53	2562.39
18.54	1290.49	18.54	300.578	18.54	914.713	18.54	1434.65
18.55	1490.3	18.55	1592.63	18.55	1500.88	18.55	2360.5
18.56	1708.56	18.56	1187.97	18.56	1851.42	18.56	1735.02
18.57	1420.73	18.57	1147.96	18.57	1389.35	18.57	990.175
18.58	788.705	18.58	1224.48	18.58	1291.42	18.58	655.336
18.59	1909.88	18.59	930.035	18.59	1383.69	18.59	2042
18.6	1626.61	18.6	1185.27	18.6	855.754	18.6	2833.64
18.61	1470.31	18.61	1910.8	18.61	1654.32	18.61	2441.95
18.62	1215.81	18.62	768.974	18.62	1328.83	18.62	2129.83
18.63	1223.76	18.63	489.576	18.63	1897.88	18.63	2752.74
18.64	2992.12	18.64	-624.942	18.64	1742.47	18.64	2201.92
18.65	2176.33	18.65	1277.42	18.65	1413.37	18.65	3141.25
18.66	774.94	18.66	1750.04	18.66	3149.43	18.66	1548.42
18.67	2699.32	18.67	1887.27	18.67	1382.04	18.67	2338.97
18.68	1304.76	18.68	-235.059	18.68	-1.8458	18.68	2185.2
18.69	979.35	18.69	54.6936	18.69	1069.82	18.69	3221.6
18.7	1460.32	18.7	1342.82	18.7	1171.71	18.7	570.205
18.71	2020.81	18.71	2222	18.71	3457.34	18.71	3461.51
18.72	2282.12	18.72	785.127	18.72	3126.83	18.72	2682.23
18.73	1594.45	18.73	-338.057	18.73	687.533	18.73	2212.63
18.74	1169.77	18.74	820.049	18.74	1250.02	18.74	1037.07
18.75	1340.8	18.75	810.58	18.75	3134.99	18.75	1168.19
18.76	3398.19	18.76	1184.12	18.76	575.327	18.76	2552.3
18.77	2663.05	18.77	1850.68	18.77	1866.01	18.77	2316.78
18.78	2909.72	18.78	2093.56	18.78	1965.39	18.78	2049.51
18.79	1487.42	18.79	1302.1	18.79	1565.67	18.79	2700.56
18.8	1702.26	18.8	2316.63	18.8	1849.09	18.8	2308.59
18.81	2954.35	18.81	2236.99	18.81	1760.67	18.81	3175.69
18.82	3316	18.82	2299.18	18.82	1554.34	18.82	1675.3
18.83	1760.64	18.83	2641.06	18.83	2660.61	18.83	2077.87
18.84	1086.68	18.84	1314.89	18.84	3168.12	18.84	2888.15
18.85	1936.79	18.85	2487.35	18.85	1712.93	18.85	2808.85
18.86	2503.07	18.86	2837.96	18.86	1675.99	18.86	3436.07
18.87	4116.45	18.87	1688.18	18.87	3727.41	18.87	2304.27
18.88	3348.56	18.88	2495.4	18.88	3838.4	18.88	2501.35
18.89	4538.86	18.89	3456.02	18.89	3566.85	18.89	2101
18.9	3060.86	18.9	2706.82	18.9	2516.48	18.9	4028.52
18.91	3741.68	18.91	4084.05	18.91	3300.85	18.91	2651.12
18.92	5135.78	18.92	3883.07	18.92	4332.18	18.92	3799.86
18.93	4928.66	18.93	5895.14	18.93	4622.03	18.93	6252.23
18.94	4716.41	18.94	5506.57	18.94	4849.13	18.94	5270.55
18.95	4325.97	18.95	5265.27	18.95	6187.51	18.95	5857.96
18.96	5044.49	18.96	5351.45	18.96	4626.64	18.96	7205.64
18.97	3725.62	18.97	5389.05	18.97	6197.21	18.97	6617.88
18.98	5685.34	18.98	5992.6	18.98	6159.56	18.98	7631.27
18.99	4092.77	18.99	6734.67	18.99	7595.07	18.99	9453.37
19	4883.7	19	7482.89	19	8270.2	19	11583.9
19.01	6883.82	19.01	6640.59	19.01	6738.03	19.01	11844.8
19.02	6064.32	19.02	6745.79	19.02	8470.91	19.02	12641.3
19.03	6239.51	19.03	6503.82	19.03	8572.22	19.03	14018.8
19.04	5468.48	19.04	4755.48	19.04	7586.32	19.04	14054
19.05	4955.42	19.05	4645.46	19.05	6718.48	19.05	14501
19.06	4634.26	19.06	5556.65	19.06	7080.49	19.06	12676.3
19.07	4390.52	19.07	4688.23	19.07	6725.76	19.07	10850.6
19.08	4710.81	19.08	3628.41	19.08	5279.48	19.08	8926.26
19.09	5015.48	19.09	4499.36	19.09	5677.14	19.09	9141.15
19.1	4908	19.1	3605.68	19.1	3894.9	19.1	7654.98
19.11	4850.49	19.11	3047.89	19.11	3197.97	19.11	7672.44
19.12	4761.32	19.12	3347.28	19.12	3851.97	19.12	6920.47
19.13	3368.62	19.13	2503.47	19.13	2156.4	19.13	5167.31
19.14	3057.19	19.14	2524.73	19.14	2659.89	19.14	4638
19.15	2166.73	19.15	2077.66	19.15	2120.98	19.15	4309.81
19.16	2473.7	19.16	1786.02	19.16	1986.74	19.16	4557.09
19.17	3109.23	19.17	1648.7	19.17	2621.27	19.17	3478.01
19.18	2613.56	19.18	2685.95	19.18	2406.92	19.18	3110.31
19.19	1528.88	19.19	135.173	19.19	2181.74	19.19	4028.02
19.2	1745.02	19.2	472.566	19.2	1664.29	19.2	1556.36
19.21	1792.25	19.21	1333.99	19.21	2374.37	19.21	2907.09
19.22	2663.8	19.22	873.666	19.22	2271.63	19.22	949.915
19.23	2402.49	19.23	1015.93	19.23	1385.43	19.23	2881.35
19.24	2996.43	19.24	1360.62	19.24	1111.48	19.24	3477.88
19.25	2313.52	19.25	2309.31	19.25	1218.94	19.25	2904.34
19.26	1360.89	19.26	806.072	19.26	1652.55	19.26	1952.46
19.27	2639.04	19.27	2073.78	19.27	1937.06	19.27	2424.03
19.28	2170.1	19.28	1238.86	19.28	1664.7	19.28	1071.61
19.29	2879.45	19.29	174.126	19.29	1575.75	19.29	1849.7
19.3	2378.73	19.3	42.5473	19.3	1590.6	19.3	2442.65
19.31	1429.75	19.31	466.06	19.31	1187.3	19.31	823.288
19.32	1419.72	19.32	1041.76	19.32	911.691	19.32	443.803
19.33	2484.93	19.33	1501.29	19.33	2106.24	19.33	1867.47
19.34	2275.31	19.34	600.181	19.34	591.749	19.34	2160.43
19.35	1685.12	19.35	223.908	19.35	1528.22	19.35	2528.17
19.36	2475.87	19.36	193.84	19.36	1129.18	19.36	2772.58
19.37	2049.69	19.37	215.054	19.37	1599.07	19.37	2545.12
19.38	822.333	19.38	1220.89	19.38	2818.1	19.38	2407.54
19.39	1510.77	19.39	2895.86	19.39	1792.69	19.39	3760.33
19.4	1977.14	19.4	1148.89	19.4	1187.9	19.4	831.602
19.41	1711	19.41	1403.35	19.41	630.186	19.41	964.849
19.42	2483.04	19.42	1059.8	19.42	1608.85	19.42	1704.13
19.43	1138	19.43	768.138	19.43	1096.31	19.43	497.343
19.44	445.782	19.44	1709.93	19.44	1490.44	19.44	2028.09
19.45	1609.51	19.45	-296.859	19.45	886.718	19.45	1620.31
19.46	1706.01	19.46	1289.15	19.46	1287.99	19.46	2604.53
19.47	1359.58	19.47	1458.71	19.47	1697.43	19.47	1458.61
19.48	1919.9	19.48	211.243	19.48	955.414	19.48	2126.09
19.49	567.591	19.49	996.712	19.49	1073.13	19.49	2485.75
19.5	3064.32	19.5	-122.692	19.5	1143.89	19.5	1553
19.51	1160.39	19.51	-14.8793	19.51	3502.62	19.51	1458.09
19.52	1343.86	19.52	423.89	19.52	1371.97	19.52	1676.97
19.53	1936.82	19.53	387.285	19.53	2206.45	19.53	1055.13
19.54	1059.83	19.54	1516.58	19.54	2406.23	19.54	2586.57
19.55	995.746	19.55	2073.13	19.55	1849.68	19.55	2773.31
19.56	1200.36	19.56	1779.79	19.56	1427.52	19.56	1190.99
19.57	1555.41	19.57	567.611	19.57	2759.6	19.57	2337.74
19.58	850.615	19.58	713.162	19.58	1340.66	19.58	-105.54
19.59	269.015	19.59	688.051	19.59	1274.46	19.59	2484.62
19.6	1117.03	19.6	-52.5999	19.6	1274.31	19.6	1364.64
19.61	469.426	19.61	846.313	19.61	1684.22	19.61	1325.52
19.62	241.426	19.62	446.863	19.62	1370.08	19.62	1448.04
19.63	540.045	19.63	1367.95	19.63	891.365	19.63	2236.08
19.64	2217.9	19.64	1755.74	19.64	1685.09	19.64	2440.55
19.65	2108.44	19.65	1324.86	19.65	545.977	19.65	2100.37
19.66	1138.88	19.66	554.609	19.66	1900.84	19.66	2525.15
19.67	1459.29	19.67	-279.843	19.67	798.226	19.67	2451.54
19.68	2166.11	19.68	-407.994	19.68	1821.58	19.68	2066.59
19.69	1288.91	19.69	1362.01	19.69	2483.51	19.69	2975.32
19.7	724.533	19.7	875.303	19.7	1988.69	19.7	1807.09
19.71	1950.19	19.71	552.172	19.71	820.487	19.71	174.882
19.72	1755.76	19.72	1197.04	19.72	129.265	19.72	3211.81
19.73	1953.52	19.73	149.56	19.73	1079.9	19.73	2375.99
19.74	2515.99	19.74	797.152	19.74	1268.64	19.74	2476.39
19.75	1498.33	19.75	1549.44	19.75	1373.68	19.75	2590.05
19.76	1283.23	19.76	1472.12	19.76	1811.49	19.76	2341.08
19.77	1770.4	19.77	1041.7	19.77	592.322	19.77	2710.92
19.78	1485.33	19.78	1239.14	19.78	1892.79	19.78	1933.14
19.79	1559.49	19.79	918.785	19.79	1751.7	19.79	331.745
19.8	1755.05	19.8	1316.15	19.8	694.793	19.8	1145.42
19.81	2258.27	19.81	1323.53	19.81	1861.42	19.81	2361.29
19.82	3134.39	19.82	252.408	19.82	2140.05	19.82	2156.37
19.83	968.737	19.83	1173.57	19.83	1202.67	19.83	2222.33
19.84	2188.28	19.84	491.658	19.84	1546.35	19.84	-750.477
19.85	1110.62	19.85	460.021	19.85	1119.4	19.85	857.045
19.86	1194.46	19.86	-83.0601	19.86	1257.32	19.86	-36.0878
19.87	965.577	19.87	991.225	19.87	1185.26	19.87	88.3057
19.88	1856	19.88	-367.31	19.88	2260.89	19.88	3207.98
19.89	2326.41	19.89	227.171	19.89	1229.37	19.89	2636.93
19.9	2522.93	19.9	790.303	19.9	653.334	19.9	1073.36
19.91	1351.41	19.91	1723.13	19.91	1179.22	19.91	2318.71
19.92	638.19	19.92	1151.36	19.92	491.078	19.92	2920.86
19.93	1532.25	19.93	1177.14	19.93	912.452	19.93	2013.1
19.94	78.2716	19.94	895.633	19.94	1348.9	19.94	622.973
19.95	1217.16	19.95	935.562	19.95	1088.87	19.95	722.793
19.96	2421.07	19.96	947.002	19.96	1506.92	19.96	1790.43
19.97	814.94	19.97	2292.97	19.97	890.636	19.97	3112.13
19.98	1266.55	19.98	1315.71	19.98	1009.38	19.98	1269.71
19.99	2249.73	19.99	784.56	19.99	2469.52	19.99	1400.48
20	2104.19	20	330.577	20	946.753	20	1936.82
20.01	1658.61	20.01	1330.76	20.01	1419.7	20.01	1592.39
20.02	2002.65	20.02	697.666	20.02	1799.8	20.02	1519.27
20.03	944.492	20.03	542.878	20.03	1341.51	20.03	1127.79
20.04	890.64	20.04	490.076	20.04	1499.36	20.04	1198.95
20.05	951.332	20.05	1133.35	20.05	1187.49	20.05	1453.06
20.06	2211.58	20.06	737.767	20.06	1139.43	20.06	421.017
20.07	1626.59	20.07	-300.301	20.07	941.921	20.07	1588.31
20.08	1962.07	20.08	1326.37	20.08	1949.39	20.08	2436.91
20.09	1589.84	20.09	653.161	20.09	1400.3	20.09	2508.83
20.1	1181.61	20.1	642.459	20.1	655.557	20.1	2528.88
20.11	1162.68	20.11	2787.14	20.11	1915.26	20.11	1370.97
20.12	2565.59	20.12	1522.39	20.12	1399.35	20.12	837.748
20.13	2492.77	20.13	300.815	20.13	1202.03	20.13	1377.5
20.14	932.227	20.14	698.312	20.14	1668.75	20.14	2701.74
20.15	1611.09	20.15	2550.54	20.15	1252.53	20.15	2280.92
20.16	1712.38	20.16	797.585	20.16	1630.24	20.16	1645.32
20.17	1236.77	20.17	2270.63	20.17	1644.49	20.17	4674.51
20.18	2188.08	20.18	298.216	20.18	16.0993	20.18	1314.06
20.19	1267.44	20.19	562.644	20.19	1092.65	20.19	78.659
20.2	2771.49	20.2	825.997	20.2	1745.72	20.2	1350.2
20.21	655.398	20.21	701.939	20.21	962.568	20.21	2485.88
20.22	2085.09	20.22	964.72	20.22	1418.27	20.22	2385.62
20.23	2241.39	20.23	1039.03	20.23	2645.31	20.23	2057.8
20.24	1920.05	20.24	1137.06	20.24	1688.36	20.24	1463.32
20.25	266.433	20.25	-715.293	20.25	1626.58	20.25	2338.2
20.26	2681.87	20.26	886.915	20.26	1952.59	20.26	1722.39
20.27	3241.31	20.27	1114.58	20.27	2475.44	20.27	4121.8
20.28	481.208	20.28	1027.96	20.28	1853.12	20.28	1482.62
20.29	1217.29	20.29	658.686	20.29	561.749	20.29	1887.24
20.3	245.134	20.3	1170.79	20.3	1121.87	20.3	1152.3
20.31	613.609	20.31	221.819	20.31	1798.94	20.31	2045.46
20.32	951.29	20.32	-240.172	20.32	453.713	20.32	2512.92
20.33	2709.44	20.33	492.055	20.33	952.486	20.33	1439.23
20.34	2690.02	20.34	-356.502	20.34	1346.05	20.34	2838.68
20.35	2072.74	20.35	800.134	20.35	1792.15	20.35	3970.65
20.36	3199.65	20.36	479.265	20.36	-170.483	20.36	1583.96
20.37	1260.77	20.37	841.832	20.37	-63.2525	20.37	340.752
20.38	2151.19	20.38	342.669	20.38	1200.39	20.38	1908.94
20.39	1332.22	20.39	1179.41	20.39	891.188	20.39	904.774
20.4	1027.74	20.4	2077.3	20.4	1383.5	20.4	1705.94
20.41	194.682	20.41	2178.13	20.41	-300.993	20.41	613.229
20.42	1565.83	20.42	282.019	20.42	1589.79	20.42	607.749
20.43	2399.14	20.43	1362.22	20.43	1477.18	20.43	3448.32
20.44	2128.35	20.44	560.409	20.44	1409.14	20.44	2565.42
20.45	2755.26	20.45	6.88192	20.45	358.396	20.45	2410.86
20.46	2415.34	20.46	-372.075	20.46	-508.182	20.46	1831.6
20.47	2100.98	20.47	383.199	20.47	597.01	20.47	1728.78
20.48	1823.17	20.48	916.25	20.48	2200.67	20.48	1324.73
20.49	158.857	20.49	408.344	20.49	1895.36	20.49	2619.18
20.5	2100.81	20.5	924.325	20.5	1745.68	20.5	1744.49
20.51	1697.45	20.51	-11.6244	20.51	1352.17	20.51	1461
20.52	2247.63	20.52	1580.32	20.52	1747.94	20.52	972.058
20.53	192.174	20.53	991.9	20.53	1786.64	20.53	2261.64
20.54	1643.49	20.54	-172.38	20.54	1088.92	20.54	3082.5
20.55	1584.58	20.55	405.876	20.55	2186.65	20.55	636.375
20.56	2258.54	20.56	1651.04	20.56	373.633	20.56	1408.51
20.57	1416.35	20.57	1563.4	20.57	1352.74	20.57	565.985
20.58	1913.3	20.58	1254.68	20.58	3370.7	20.58	445.525
20.59	1590.09	20.59	2240.08	20.59	2647	20.59	236.4
20.6	1965.03	20.6	1158.32	20.6	2199.45	20.6	2369.99
20.61	1424.69	20.61	960.15	20.61	1334.85	20.61	1135.7
20.62	-7.78644	20.62	873.357	20.62	1945.75	20.62	1207.09
20.63	1040.61	20.63	1000.91	20.63	2128.53	20.63	760.028
20.64	951.892	20.64	487.093	20.64	984.549	20.64	1224.67
20.65	1505.53	20.65	2249.39	20.65	895.675	20.65	2985.22
20.66	3087.19	20.66	1596.65	20.66	1144.3	20.66	1044.86
20.67	1762.88	20.67	473.291	20.67	934.68	20.67	1413.43
20.68	986.131	20.68	1350.99	20.68	590.962	20.68	2438.64
20.69	810.892	20.69	-518.273	20.69	566.477	20.69	2231.56
20.7	1220.78	20.7	732.503	20.7	1470.81	20.7	2100.19
20.71	3018.52	20.71	1231.17	20.71	1033.21	20.71	1363.56
20.72	1625.77	20.72	850.646	20.72	980.485	20.72	1567.87
20.73	2214.72	20.73	2063.14	20.73	193.31	20.73	1954.66
20.74	1975.49	20.74	1034.67	20.74	1215.55	20.74	1335.14
20.75	971.124	20.75	1363.62	20.75	1332.18	20.75	2714.02
20.76	2078.51	20.76	792.375	20.76	2061.21	20.76	2892.46
20.77	1719.53	20.77	752.051	20.77	2037.2	20.77	2209.4
20.78	2129.22	20.78	351.049	20.78	1145.69	20.78	1680.62
20.79	1466.95	20.79	627.307	20.79	1359.22	20.79	2039.31
20.8	1702.88	20.8	1439.5	20.8	2265.48	20.8	2100.46
20.81	2351.31	20.81	10.6452	20.81	1655.47	20.81	922.984
20.82	2496.91	20.82	192.316	20.82	844.575	20.82	1362.37
20.83	2687.75	20.83	1989.8	20.83	1613.77	20.83	1988.51
20.84	2034.12	20.84	320.446	20.84	2729.96	20.84	2751.83
20.85	1808.49	20.85	1612.86	20.85	-248.449	20.85	2709.49
20.86	1454.85	20.86	212.17	20.86	2022.25	20.86	1327.71
20.87	2019.53	20.87	1035.41	20.87	874.01	20.87	3843.27
20.88	582.944	20.88	377.98	20.88	1522.12	20.88	1673.42
20.89	1895.32	20.89	560.357	20.89	1513.13	20.89	618.428
20.9	1380.57	20.9	830.045	20.9	2120.73	20.9	3033.49
20.91	548.457	20.91	866.739	20.91	1113.87	20.91	1988.58
20.92	1054.06	20.92	-91.4402	20.92	2497.71	20.92	2156.45
20.93	1889.81	20.93	782.145	20.93	342.507	20.93	2179.19
20.94	1326.18	20.94	-147.522	20.94	374.115	20.94	1885.53
20.95	2405.33	20.95	438.169	20.95	1528.14	20.95	1899
20.96	1725.52	20.96	1126.88	20.96	1551.23	20.96	2649.14
20.97	1365.07	20.97	268.92	20.97	2391.64	20.97	2014.56
20.98	2346.71	20.98	374.035	20.98	1398.33	20.98	1859.66
20.99	1498.55	20.99	445.445	20.99	2576.44	20.99	2789.99
21	2427.32	21	-7.58758	21	1252.06	21	1816.12
21.01	2032.15	21.01	370.424	21.01	1324.38	21.01	1754.09
21.02	1431.58	21.02	938.183	21.02	405.259	21.02	795.323
21.03	-43.0018	21.03	1961.14	21.03	1182.77	21.03	2345.09
21.04	2437.89	21.04	1463.69	21.04	1215.69	21.04	1319.94
21.05	582.152	21.05	553.482	21.05	1472.15	21.05	2983.53
21.06	2664.21	21.06	1900.49	21.06	2061.3	21.06	2521.84
21.07	1788.45	21.07	907.455	21.07	1723.65	21.07	1871.72
21.08	1826.53	21.08	1325.05	21.08	731.727	21.08	2255.9
21.09	3010.58	21.09	427.818	21.09	1574.44	21.09	1157.28
21.1	1599.35	21.1	963.06	21.1	670.48	21.1	1251.61
21.11	2952.08	21.11	617.088	21.11	1638.44	21.11	1480.17
21.12	869.72	21.12	1929.38	21.12	1050.97	21.12	787.637
21.13	2099.59	21.13	1092.56	21.13	2123.36	21.13	1603.1
21.14	1252.51	21.14	1452.02	21.14	2313.09	21.14	2596.55
21.15	99.7543	21.15	1371.31	21.15	831.061	21.15	782.162
21.16	1865.56	21.16	-9.22519	21.16	2133.63	21.16	1802.91
21.17	2016.64	21.17	666.013	21.17	1538.01	21.17	1318.03
21.18	1861.95	21.18	95.5131	21.18	1838.46	21.18	2993.89
21.19	1628.93	21.19	1225.5	21.19	2883.74	21.19	2098.16
21.2	1695.45	21.2	1099.92	21.2	1715.55	21.2	2818.15
21.21	2988.99	21.21	126.955	21.21	2013.29	21.21	2565.75
21.22	602.853	21.22	643.225	21.22	1383.4	21.22	1552.04
21.23	571.572	21.23	-1210.2	21.23	740.891	21.23	2172.82
21.24	1907.89	21.24	1447.8	21.24	1489.5	21.24	1865.71
21.25	2930.44	21.25	441.5	21.25	1626.64	21.25	815.944
21.26	1283.11	21.26	192.813	21.26	1263.11	21.26	3340.6
21.27	1815.44	21.27	1463.69	21.27	1409.45	21.27	4206.59
21.28	1783.1	21.28	1409.95	21.28	2021.66	21.28	2066.16
21.29	1179.82	21.29	1174.07	21.29	1363.27	21.29	1139.52
21.3	845.836	21.3	398.162	21.3	2313.05	21.3	3292.27
21.31	505.379	21.31	-220.187	21.31	1460.53	21.31	2073.18
21.32	1437.48	21.32	541.774	21.32	1078.24	21.32	2760.59
21.33	838.368	21.33	260.03	21.33	2062.12	21.33	3453.79
21.34	1046.8	21.34	842.461	21.34	163.513	21.34	2596.19
21.35	1205.73	21.35	1464.54	21.35	955.546	21.35	1625.42
21.36	218.722	21.36	1663.58	21.36	977.744	21.36	648.78
21.37	1238.71	21.37	1094.18	21.37	1259.68	21.37	1602.62
21.38	1893.83	21.38	1223.01	21.38	1910.17	21.38	2676.17
21.39	475.937	21.39	1431.41	21.39	3151.9	21.39	1602.09
21.4	885.135	21.4	545.966	21.4	1580.7	21.4	2121.77
21.41	867.002	21.41	826.04	21.41	482.489	21.41	2452.24
21.42	2006.09	21.42	776.616	21.42	1047.27	21.42	3499.59
21.43	1461.82	21.43	1292.76	21.43	1815.03	21.43	2392.8
21.44	1138.36	21.44	2569.66	21.44	255.572	21.44	1181.5
21.45	2573	21.45	1806.69	21.45	1204.64	21.45	2533.89
21.46	2032.48	21.46	518.97	21.46	1541.15	21.46	2799.21
21.47	1865.86	21.47	821.665	21.47	653.068	21.47	2419.42
21.48	1024.06	21.48	1198.65	21.48	591.702	21.48	2034.14
21.49	2182.02	21.49	998.698	21.49	1932.98	21.49	1574.43
21.5	42.4092	21.5	1239.71	21.5	612.655	21.5	320.056
21.51	1764.25	21.51	907.114	21.51	1126.23	21.51	1731.01
21.52	2427.78	21.52	427.358	21.52	1997.05	21.52	1334.81
21.53	1789.55	21.53	682.064	21.53	1867.94	21.53	1582.31
21.54	1034.12	21.54	-459.629	21.54	2677.6	21.54	2733.24
21.55	2609.23	21.55	934.201	21.55	2714.91	21.55	2640.02
21.56	2735.54	21.56	1632.5	21.56	816.48	21.56	2034.97
21.57	859.03	21.57	717.371	21.57	1074.84	21.57	3483.81
21.58	1630.38	21.58	275.303	21.58	2054.48	21.58	1232.89
21.59	1791.46	21.59	1108.43	21.59	-312.394	21.59	1267.17
21.6	1065.85	21.6	290.432	21.6	1855.19	21.6	1147.96
21.61	2008.48	21.61	782.82	21.61	1375.57	21.61	426.537
21.62	1904.42	21.62	1669.57	21.62	377.343	21.62	2502.39
21.63	2393.86	21.63	662.878	21.63	1365.62	21.63	1652.44
21.64	813.431	21.64	1859.73	21.64	1583.3	21.64	2024.42
21.65	-368.146	21.65	1674.61	21.65	3417.8	21.65	969.554
21.66	1333.45	21.66	1591.68	21.66	1091.56	21.66	585.183
21.67	1605.42	21.67	1639.47	21.67	1590.53	21.67	1204.37
21.68	2093.41	21.68	1336.07	21.68	1140.28	21.68	1327.96
21.69	947.795	21.69	735.585	21.69	1707.18	21.69	1884.45
21.7	3007.16	21.7	-1.04309	21.7	2248.35	21.7	1339.63
21.71	1437.29	21.71	1217.17	21.71	467.541	21.71	2229.25
21.72	1492.95	21.72	-153.03	21.72	936.579	21.72	2119.49
21.73	1251.96	21.73	-133.093	21.73	944.288	21.73	2171.51
21.74	1628.84	21.74	136.763	21.74	2162.5	21.74	1343.63
21.75	1020.62	21.75	417.984	21.75	1960.36	21.75	2164.13
21.76	900.298	21.76	1793.09	21.76	1923.13	21.76	1222.58
21.77	378.493	21.77	408.835	21.77	729.468	21.77	2100.74
21.78	347.873	21.78	202.802	21.78	2007.46	21.78	2171.68
21.79	1574.75	21.79	892.724	21.79	780.418	21.79	1747.39
21.8	2175.6	21.8	-54.5524	21.8	1291.95	21.8	1988.79
21.81	2602.45	21.81	58.7184	21.81	2344.48	21.81	565.922
21.82	839.876	21.82	324.844	21.82	1021.12	21.82	274.219
21.83	1995	21.83	788.063	21.83	346.538	21.83	1719.88
21.84	2390.11	21.84	1672.41	21.84	1669.42	21.84	1864.35
21.85	2232.08	21.85	959.673	21.85	1945.42	21.85	2028.27
21.86	1284.2	21.86	656.433	21.86	1088.87	21.86	2350.69
21.87	1254.27	21.87	610.853	21.87	1308.84	21.87	1101.33
21.88	383.748	21.88	301.998	21.88	1936.92	21.88	1425.41
21.89	514.361	21.89	709.543	21.89	1047.13	21.89	2386.7
21.9	1288.6	21.9	538.107	21.9	1462.75	21.9	1305.17
21.91	1716.76	21.91	542.589	21.91	2269.6	21.91	1671.54
21.92	1793.43	21.92	-146.439	21.92	1608.05	21.92	1687.8
21.93	1785.42	21.93	50.8358	21.93	754.775	21.93	2722.5
21.94	1541.73	21.94	758.316	21.94	-264.28	21.94	701.742
21.95	1606.24	21.95	552.973	21.95	1423.59	21.95	4358.8
21.96	2995.93	21.96	1058.21	21.96	1790.15	21.96	3827.37
21.97	2120.24	21.97	845.592	21.97	-520.582	21.97	1778.05
21.98	2459.68	21.98	818.241	21.98	-62.9214	21.98	2195.54
21.99	1451.89	21.99	865.812	21.99	989.254	21.99	1251.13
22	1943.26	22	494.067	22	123.819	22	1916.06
22.01	985.363	22.01	450.121	22.01	1549.78	22.01	1678.75
22.02	1510.6	22.02	243.662	22.02	548.629	22.02	2061.75
22.03	59.4109	22.03	237.265	22.03	2535.72	22.03	1379.99
22.04	980.157	22.04	536.707	22.04	1116.52	22.04	1326.19
22.05	1999.73	22.05	402.81	22.05	1140.09	22.05	2631.39
22.06	2934.72	22.06	1343.3	22.06	2108.46	22.06	2420.57
22.07	1735.71	22.07	280.992	22.07	467.755	22.07	930.681
22.08	982.456	22.08	324.351	22.08	461.785	22.08	1545.39
22.09	1691.61	22.09	289.94	22.09	1201.28	22.09	2617.64
22.1	2486.3	22.1	1564.05	22.1	1048.25	22.1	1880.22
22.11	824.432	22.11	1137.82	22.11	2934.09	22.11	1851.68
22.12	887.291	22.12	1612.2	22.12	911.105	22.12	2175.26
22.13	1005.45	22.13	756.275	22.13	594.507	22.13	4152.13
22.14	654.805	22.14	352.693	22.14	946.561	22.14	1207.94
22.15	1414.22	22.15	678.236	22.15	314.113	22.15	2522.6
22.16	1421.23	22.16	1084.97	22.16	1086.62	22.16	1703.22
22.17	1497.12	22.17	361.409	22.17	288.349	22.17	2733.19
22.18	1417.49	22.18	1172.2	22.18	-116.772	22.18	2118.58
22.19	520.409	22.19	2019.82	22.19	203.303	22.19	2219.52
22.2	1582.7	22.2	530.971	22.2	-370.092	22.2	3483.27
22.21	1511.57	22.21	580.413	22.21	1141.11	22.21	3117.82
22.22	-437.192	22.22	1726.81	22.22	1187.51	22.22	245.983
22.23	1950.87	22.23	1374.43	22.23	1100.38	22.23	1985.91
22.24	1219.46	22.24	1650.34	22.24	1223.17	22.24	1872.26
22.25	1577.78	22.25	885.769	22.25	519.876	22.25	2540.6
22.26	1110.65	22.26	1206.49	22.26	1180.49	22.26	1764.34
22.27	1712.81	22.27	777.187	22.27	1457.49	22.27	1264.13
22.28	2575.14	22.28	2299.98	22.28	1328.97	22.28	2431.31
22.29	327.216	22.29	325.616	22.29	1804.7	22.29	2180.34
22.3	2693.24	22.3	1012.53	22.3	1665.56	22.3	141.385
22.31	1131.5	22.31	1080.67	22.31	1580.3	22.31	679.824
22.32	1131.14	22.32	2080.29	22.32	1049.52	22.32	1639.78
22.33	2019.47	22.33	1081.34	22.33	59.0668	22.33	2675.17
22.34	760.137	22.34	744.864	22.34	633.611	22.34	907.316
22.35	1287.41	22.35	778.747	22.35	539.633	22.35	1846.46
22.36	2458.38	22.36	-1.73551	22.36	559.995	22.36	1632.52
22.37	2825.68	22.37	1246.49	22.37	1021.97	22.37	1585.58
22.38	1521.01	22.38	1349.27	22.38	902.616	22.38	3296.42
22.39	63.1303	22.39	904.213	22.39	676.913	22.39	2981.71
22.4	1188.01	22.4	370.192	22.4	1504.66	22.4	3363.14
22.41	1183.73	22.41	1442.37	22.41	2090.24	22.41	1132.26
22.42	1421.29	22.42	520.438	22.42	1964.17	22.42	2813.04
22.43	678.33	22.43	848.595	22.43	517.102	22.43	3182.65
22.44	1495.91	22.44	419.35	22.44	1788.8	22.44	2849.32
22.45	1613.55	22.45	805.335	22.45	1580.48	22.45	2972.03
22.46	500.233	22.46	608.316	22.46	949.472	22.46	2690
22.47	772.874	22.47	900.324	22.47	1576.8	22.47	2352.77
22.48	1468.85	22.48	1364.71	22.48	1401.72	22.48	1224.67
22.49	1756.38	22.49	848.1	22.49	68.4048	22.49	1074.28
22.5	1013.94	22.5	1256.58	22.5	215.908	22.5	2181.75
22.51	1997.38	22.51	540.217	22.51	839.574	22.51	2395.28
22.52	1650.05	22.52	2446.3	22.52	704.43	22.52	577.54
22.53	301.471	22.53	469.285	22.53	1334.09	22.53	1859.01
22.54	2163.76	22.54	1300.07	22.54	547.832	22.54	2184.54
22.55	3592	22.55	844.922	22.55	898.715	22.55	2070.09
22.56	1233.86	22.56	584.963	22.56	1001.37	22.56	541.358
22.57	2340.37	22.57	1639.82	22.57	2210.61	22.57	2804.14
22.58	2371.38	22.58	1242.02	22.58	1949.02	22.58	3162.95
22.59	2769.77	22.59	1127.41	22.59	650.841	22.59	1012.15
22.6	1895.43	22.6	-188.666	22.6	31.4888	22.6	1669.26
22.61	657.634	22.61	1881.31	22.61	1999.26	22.61	2907.4
22.62	700.844	22.62	1010.66	22.62	977.641	22.62	2831
22.63	1510.99	22.63	-312.024	22.63	1201.79	22.63	2144.27
22.64	3096.47	22.64	1261.65	22.64	431.47	22.64	2008.3
22.65	1356.29	22.65	1936.77	22.65	917.153	22.65	1321.15
22.66	2750.79	22.66	-46.5441	22.66	-80.291	22.66	3477.87
22.67	986.54	22.67	2238.8	22.67	1159.31	22.67	1730.16
22.68	772.292	22.68	2058.63	22.68	98.2086	22.68	2378.29
22.69	869.963	22.69	343.112	22.69	1392.17	22.69	2023.44
22.7	1608.71	22.7	-576.762	22.7	975.321	22.7	1392.55
22.71	1343.38	22.71	1089.27	22.71	-12.2142	22.71	1122.57
22.72	1902.92	22.72	866.821	22.72	-303.142	22.72	939.086
22.73	759.423	22.73	-220.742	22.73	1584.69	22.73	2583.52
22.74	1949.99	22.74	2360.26	22.74	760.234	22.74	3066.98
22.75	243.438	22.75	2418.52	22.75	1457.15	22.75	1805.1
22.76	661.493	22.76	1584.19	22.76	1193.22	22.76	1840.1
22.77	764.274	22.77	-44.3641	22.77	2105.2	22.77	1556.25
22.78	1148.26	22.78	1306.63	22.78	2065.41	22.78	2462.64
22.79	2193.5	22.79	-600.547	22.79	127.093	22.79	2507.67
22.8	2015.43	22.8	1949.9	22.8	1386.27	22.8	1894.11
22.81	409.854	22.81	1509.67	22.81	996.13	22.81	649.273
22.82	1073.46	22.82	1466.38	22.82	989.63	22.82	1154.83
22.83	2339.14	22.83	1014.21	22.83	1776.49	22.83	2312.55
22.84	1131.6	22.84	1529.92	22.84	1844.13	22.84	387.104
22.85	2346.07	22.85	1274.49	22.85	1978.9	22.85	1228.17
22.86	1003.17	22.86	1097.66	22.86	1542.45	22.86	1691.03
22.87	1276.74	22.87	255.04	22.87	1565.01	22.87	986.558
22.88	2139.29	22.88	987.767	22.88	2100.37	22.88	1164.52
22.89	1600.07	22.89	1457.38	22.89	1197.71	22.89	2272.72
22.9	212.219	22.9	460.751	22.9	1625.12	22.9	2196.11
22.91	1203.59	22.91	1291.74	22.91	680.689	22.91	768.524
22.92	2078.41	22.92	274.216	22.92	226.268	22.92	1659.42
22.93	2038.74	22.93	613.942	22.93	325.63	22.93	2264.63
22.94	1316.34	22.94	1546.93	22.94	1015.66	22.94	575.349
22.95	2368.46	22.95	2739.15	22.95	2182.47	22.95	2633.2
22.96	929.145	22.96	1726.24	22.96	566.591	22.96	2554.63
22.97	1898.98	22.97	1532.48	22.97	2016.68	22.97	2020.35
22.98	1249.93	22.98	1286.98	22.98	2108.16	22.98	967.009
22.99	1376.07	22.99	966.07	22.99	1869.72	22.99	2640.6
23	1232.51	23	2342.34	23	679.339	23	2788.66
23.01	2965.75	23.01	949.129	23.01	670.4	23.01	2766.69
23.02	2093.86	23.02	985.593	23.02	1264.5	23.02	2552.47
23.03	1935.66	23.03	940.137	23.03	981.191	23.03	1965.69
23.04	1738.06	23.04	1715.8	23.04	1721.49	23.04	431.999
23.05	3199.05	23.05	484.471	23.05	2209.62	23.05	1062.68
23.06	2386.94	23.06	1588.53	23.06	1262.28	23.06	853.731
23.07	2144.86	23.07	717.194	23.07	1279.33	23.07	1293.18
23.08	2161.9	23.08	1439.17	23.08	1428.61	23.08	2830.3
23.09	1081.5	23.09	4.57261	23.09	1230.99	23.09	1644.59
23.1	445.552	23.1	1619.14	23.1	460.033	23.1	1075.42
23.11	1895.67	23.11	1224.08	23.11	809.376	23.11	2060.07
23.12	2147.93	23.12	1068.28	23.12	669.051	23.12	1900.04
23.13	1462	23.13	114.56	23.13	1668.71	23.13	35.8062
23.14	980.276	23.14	1676.11	23.14	1045.8	23.14	864.519
23.15	1850.84	23.15	-189.387	23.15	1053.38	23.15	1419.93
23.16	2462.04	23.16	1441.29	23.16	100.451	23.16	3024.2
23.17	1674.7	23.17	38.773	23.17	1171.06	23.17	1830.37
23.18	1991.08	23.18	852.844	23.18	25.7864	23.18	892.888
23.19	1918.14	23.19	1745.85	23.19	913.055	23.19	251.705
23.2	689.533	23.2	1881.21	23.2	713.964	23.2	1870.36
23.21	1607.86	23.21	1393.28	23.21	1725.24	23.21	2305.64
23.22	1516.66	23.22	204.059	23.22	1233.91	23.22	1587.87
23.23	1150.12	23.23	658.463	23.23	684.114	23.23	925.572
23.24	1895.43	23.24	925.23	23.24	1279.61	23.24	1332.86
23.25	2673.08	23.25	831.88	23.25	1302.53	23.25	509.735
23.26	2438.36	23.26	475.32	23.26	277.574	23.26	1933.78
23.27	1064.83	23.27	2526.11	23.27	1588.5	23.27	2278.47
23.28	996.654	23.28	1623.7	23.28	1043.91	23.28	1389.06
23.29	2182.94	23.29	1484.4	23.29	2473.14	23.29	980.962
23.3	1851.84	23.3	540.008	23.3	2175.2	23.3	3007.37
23.31	2006.68	23.31	1438.14	23.31	1729.05	23.31	1033.71
23.32	1717.21	23.32	2323.29	23.32	1728.3	23.32	2040.56
23.33	1389.88	23.33	-78.4188	23.33	1681.18	23.33	538.576
23.34	829.729	23.34	1138.74	23.34	1274.57	23.34	1253.73
23.35	1486.03	23.35	1678.69	23.35	1662.76	23.35	734.09
23.36	1293.6	23.36	1722.89	23.36	1214.57	23.36	-246.079
23.37	1179.99	23.37	1247.39	23.37	1017.57	23.37	575.119
23.38	1494.06	23.38	478.612	23.38	2208.3	23.38	1629.42
23.39	1368.74	23.39	973.345	23.39	2119.23	23.39	713.052
23.4	914.419	23.4	949.526	23.4	185.076	23.4	854.618
23.41	909.905	23.41	727.435	23.41	1308.97	23.41	166.867
23.42	1697.88	23.42	1781.43	23.42	992.583	23.42	1113.91
23.43	1002.05	23.43	813.632	23.43	2753.84	23.43	874.256
23.44	1153.43	23.44	3509.34	23.44	797.023	23.44	490.662
23.45	446.012	23.45	1076.21	23.45	1338	23.45	1884.93
23.46	-300.761	23.46	1431.13	23.46	1951.76	23.46	1221.05
23.47	1676.23	23.47	2293.68	23.47	1535.41	23.47	958.442
23.48	2294.61	23.48	671.288	23.48	900.357	23.48	443.556
23.49	1474.1	23.49	635.737	23.49	1596.65	23.49	1648.03
23.5	2446.52	23.5	1292.86	23.5	1566.85	23.5	-85.8675
23.51	2435.72	23.51	-342.376	23.51	468.753	23.51	802.336
23.52	1375.71	23.52	844.546	23.52	271.097	23.52	1304.93
23.53	2627.83	23.53	602.328	23.53	-69.04	23.53	336.645
23.54	1489.81	23.54	1844.88	23.54	1715.47	23.54	1103.52
23.55	2563.55	23.55	1155.94	23.55	1792.1	23.55	1462.55
23.56	2039.98	23.56	1664.04	23.56	1002.98	23.56	1922.7
23.57	2201.47	23.57	2218.95	23.57	1434.51	23.57	1166.93
23.58	1279.29	23.58	981.157	23.58	2255.72	23.58	1717.98
23.59	235.049	23.59	1097.14	23.59	2142.52	23.59	2198.86
23.6	771.072	23.6	697.286	23.6	1119.25	23.6	634.181
23.61	664.39	23.61	774.332	23.61	2019.38	23.61	584.887
23.62	1399.93	23.62	1830.46	23.62	1066.11	23.62	1427.92
23.63	1452.36	23.63	989.137	23.63	1108.57	23.63	3035.47
23.64	1307.19	23.64	967.257	23.64	953.349	23.64	2375.2
23.65	487.353	23.65	801.243	23.65	1804.03	23.65	88.9501
23.66	1674.1	23.66	1661.3	23.66	1799.59	23.66	2158.45
23.67	1198.56	23.67	842.818	23.67	1642.99	23.67	1441.74
23.68	2196.74	23.68	813.083	23.68	676.217	23.68	1677.83
23.69	1407.38	23.69	825.998	23.69	2112.82	23.69	2066.42
23.7	1280.03	23.7	703.402	23.7	2106.71	23.7	1577.4
23.71	1712.47	23.71	1279.24	23.71	2057.09	23.71	939.399
23.72	1440.59	23.72	1819.32	23.72	1789.09	23.72	861.382
23.73	-134.621	23.73	414.94	23.73	1331	23.73	880.851
23.74	1667.43	23.74	-381.035	23.74	229.626	23.74	1196.98
23.75	1822.57	23.75	-286.382	23.75	1513.23	23.75	2432.34
23.76	1492.33	23.76	413.105	23.76	1463.05	23.76	1308.91
23.77	1725.94	23.77	1944.7	23.77	3624.58	23.77	1277.88
23.78	2050.74	23.78	1205.69	23.78	2188.13	23.78	456.85
23.79	1664.21	23.79	-475.399	23.79	2251.45	23.79	613.963
23.8	1001.2	23.8	1466.54	23.8	1447.23	23.8	1203.75
23.81	2913.05	23.81	1124.12	23.81	1165.74	23.81	496.118
23.82	1529.44	23.82	1907.37	23.82	1079.68	23.82	908.146
23.83	1313.5	23.83	2618.22	23.83	697.664	23.83	1135.71
23.84	476.906	23.84	903.462	23.84	2101.62	23.84	945.431
23.85	1949.01	23.85	1840.75	23.85	1668.96	23.85	938.592
23.86	1148.28	23.86	467.202	23.86	1274.98	23.86	1549.9
23.87	107.511	23.87	241.618	23.87	1788.66	23.87	1392.07
23.88	1177.15	23.88	380.995	23.88	1520.65	23.88	325.962
23.89	1327.97	23.89	2032.57	23.89	2175.97	23.89	-354.253
23.9	1343.25	23.9	1140.18	23.9	261.669	23.9	393.865
23.91	1533.49	23.91	-52.4414	23.91	1580.79	23.91	49.1223
23.92	1963.52	23.92	1479.58	23.92	1273.18	23.92	1702.49
23.93	2183.29	23.93	2085.61	23.93	1048.38	23.93	2205.26
23.94	1250.5	23.94	-453.677	23.94	24.2902	23.94	2286.84
23.95	1650.02	23.95	807.353	23.95	2468.1	23.95	1394.57
23.96	1727.37	23.96	808.53	23.96	1319.16	23.96	496.219
23.97	536.951	23.97	1002.36	23.97	1018.01	23.97	1026.19
23.98	302.645	23.98	1494.13	23.98	790.778	23.98	246.137
23.99	608.551	23.99	1114.3	23.99	1279.75	23.99	603.442
24	1029.46	24	1217.24	24	1012.42	24	1717.68
24.01	1233.1	24.01	-539.298	24.01	1435.45	24.01	2353.37
24.02	744.28	24.02	-223.518	24.02	1689.04	24.02	876.251
24.03	1780.85	24.03	1720.11	24.03	2085.39	24.03	700.46
24.04	1780.28	24.04	354.444	24.04	1632.5	24.04	1215.96
24.05	1640.12	24.05	578.641	24.05	1051.45	24.05	2385.81
24.06	1909.41	24.06	1782.28	24.06	2127.08	24.06	810.919
24.07	1880.02	24.07	791.421	24.07	3224.09	24.07	1129.98
24.08	2089.33	24.08	893.008	24.08	958.892	24.08	1064.4
24.09	2314.77	24.09	3000.74	24.09	408.303	24.09	833.149
24.1	2055.64	24.1	1583.9	24.1	887.596	24.1	2100.1
24.11	1394.49	24.11	856.092	24.11	249.911	24.11	2568.32
24.12	2107.71	24.12	787.031	24.12	1802.32	24.12	990.659
24.13	2468.01	24.13	292.159	24.13	1082.35	24.13	785.284
24.14	1692.52	24.14	1789.35	24.14	1862.79	24.14	548.777
24.15	2493.95	24.15	1860.34	24.15	-389.942	24.15	3549.28
24.16	1195.21	24.16	-631.176	24.16	188.291	24.16	1045.35
24.17	2328.91	24.17	1754.76	24.17	2063.33	24.17	3146.03
24.18	2773.85	24.18	704.488	24.18	1194.94	24.18	2170.48
24.19	552.835	24.19	852.904	24.19	510.019	24.19	1869.11
24.2	1249.45	24.2	651.561	24.2	1089.18	24.2	1084.79
24.21	3099.42	24.21	1073.2	24.21	-290.875	24.21	440.447
24.22	2245.07	24.22	566.148	24.22	2179.98	24.22	527.052
24.23	1262.52	24.23	934.014	24.23	2277.07	24.23	835.603
24.24	2470.29	24.24	44.8355	24.24	1763.65	24.24	-382.066
24.25	1297.49	24.25	185.296	24.25	500.212	24.25	1395.3
24.26	693.408	24.26	699.243	24.26	1266.98	24.26	722.117
24.27	1212.42	24.27	675.667	24.27	2731.05	24.27	543.012
24.28	1548.63	24.28	2677.69	24.28	807.455	24.28	2324.71
24.29	1180.24	24.29	1201.39	24.29	1461.48	24.29	2717.89
24.3	954.978	24.3	2530.86	24.3	1467.54	24.3	1531.3
24.31	751.619	24.31	2013.92	24.31	1078.56	24.31	1694.52
24.32	660.806	24.32	838.63	24.32	1704.37	24.32	1167.96
24.33	3480.37	24.33	1553.38	24.33	2188.53	24.33	1530.8
24.34	1679.85	24.34	3178.02	24.34	878.794	24.34	362.755
24.35	538.811	24.35	2731.1	24.35	828.358	24.35	801.124
24.36	296.497	24.36	519.883	24.36	846.672	24.36	-97.3331
24.37	1153.73	24.37	2053.76	24.37	1377.67	24.37	1159.74
24.38	217.352	24.38	2422.69	24.38	1799.8	24.38	1102.82
24.39	1167.33	24.39	1662.08	24.39	542.109	24.39	1410.32
24.4	463.311	24.4	-153.62	24.4	1497.19	24.4	829.233
24.41	1646.45	24.41	75.2652	24.41	2623.46	24.41	1343.03
24.42	105.295	24.42	1760.17	24.42	1607.55	24.42	785.945
24.43	1673.95	24.43	818.221	24.43	2438.12	24.43	458.585
24.44	1671.17	24.44	861.416	24.44	1483.53	24.44	2705.98
24.45	1212.13	24.45	146.085	24.45	348.919	24.45	1398.16
24.46	2300.2	24.46	1133.87	24.46	1129.85	24.46	1874.78
24.47	841.469	24.47	1378.82	24.47	1069.98	24.47	-143.749
24.48	615.367	24.48	379.658	24.48	1048.9	24.48	1203.3
24.49	1449.76	24.49	592.693	24.49	1956.75	24.49	1789.94
24.5	1898.26	24.5	1821.78	24.5	1392.67	24.5	2417.74
24.51	1231.19	24.51	2437.58	24.51	566.245	24.51	1130.82
24.52	1875.79	24.52	1618.75	24.52	2225.34	24.52	1105.27
24.53	1592.23	24.53	1166.27	24.53	1423.11	24.53	1270.62
24.54	1880.91	24.54	991.47	24.54	779.038	24.54	1812.37
24.55	850.441	24.55	1162.74	24.55	651.916	24.55	1433.14
24.56	266.768	24.56	1660.11	24.56	873.885	24.56	1297.81
24.57	989.081	24.57	1549.59	24.57	1696.03	24.57	2366.72
24.58	740.749	24.58	1917.29	24.58	992.547	24.58	663.393
24.59	1844.86	24.59	217.708	24.59	628.384	24.59	1122.76
24.6	838.598	24.6	57.9669	24.6	1292.67	24.6	1356.84
24.61	986.519	24.61	1236.64	24.61	1366.17	24.61	1393.27
24.62	1973.49	24.62	813.077	24.62	2377.59	24.62	2049.51
24.63	1706.39	24.63	287.301	24.63	1230.62	24.63	804.255
24.64	1079.83	24.64	1144.37	24.64	1057.07	24.64	-236.223
24.65	-574.991	24.65	1547.69	24.65	1319.89	24.65	189.132
24.66	94.5847	24.66	479.301	24.66	1575.55	24.66	1823.48
24.67	-357.129	24.67	753.056	24.67	212.386	24.67	1792.24
24.68	-336.861	24.68	729.975	24.68	-327.399	24.68	1855.42
24.69	2045.73	24.69	2914.88	24.69	800.501	24.69	2210.02
24.7	1449.14	24.7	1137.54	24.7	1039.75	24.7	1125.23
24.71	-349.238	24.71	545.546	24.71	273.555	24.71	309.926
24.72	1283.87	24.72	610.436	24.72	447.357	24.72	-926.995
24.73	1050.81	24.73	1650.95	24.73	399.245	24.73	1155.86
24.74	1658.6	24.74	960.309	24.74	900.219	24.74	1557.56
24.75	2508.47	24.75	2366.91	24.75	1397.51	24.75	245.349
24.76	1494.95	24.76	843.926	24.76	2598.29	24.76	335.815
24.77	935.173	24.77	1102.92	24.77	1458.45	24.77	1764.41
24.78	1772.32	24.78	1320.28	24.78	1677.79	24.78	85.0202
24.79	1836.4	24.79	190.971	24.79	1709.31	24.79	1088.32
24.8	1269.49	24.8	1513.35	24.8	2281.87	24.8	-26.4642
24.81	2171.47	24.81	369.441	24.81	598.459	24.81	1061.42
24.82	-17.2236	24.82	230.8	24.82	1677.8	24.82	506.166
24.83	2414.69	24.83	767.595	24.83	1247.4	24.83	1991.2
24.84	1858.13	24.84	1403.96	24.84	2039.3	24.84	-402.04
24.85	1737.47	24.85	1011.06	24.85	1171.45	24.85	846.221
24.86	693.226	24.86	2382.24	24.86	1058.41	24.86	805.469
24.87	2285.62	24.87	736.003	24.87	2384.42	24.87	1582.55
24.88	903.822	24.88	1612.61	24.88	962.184	24.88	1183.46
24.89	1379.07	24.89	1585.31	24.89	2046.06	24.89	301.189
24.9	1649.33	24.9	975.109	24.9	795.608	24.9	1306.64
24.91	2435.71	24.91	2558.19	24.91	1662.11	24.91	-508.88
24.92	1209.19	24.92	1861.49	24.92	831.051	24.92	420.502
24.93	840.868	24.93	1537.14	24.93	521.783	24.93	1273.79
24.94	979.597	24.94	2405.83	24.94	1026.67	24.94	1848.84
24.95	2320.97	24.95	-38.9263	24.95	931.897	24.95	-226.139
24.96	1023.59	24.96	1230.6	24.96	1433.01	24.96	307.286
24.97	1912.82	24.97	-217.934	24.97	1201.52	24.97	1770.42
24.98	1179.72	24.98	962.664	24.98	155.7	24.98	1652.75
24.99	1253.91	24.99	338.459	24.99	2342.84	24.99	1942.23
25	-135.946	25	1372.34	25	441.166	25	-387.858
25.01	817.243	25.01	1909.08	25.01	1333.32	25.01	856.911
25.02	1222.86	25.02	2352.17	25.02	201.133	25.02	239.167
25.03	912.442	25.03	424.325	25.03	1521.53	25.03	1903.73
25.04	1284.79	25.04	555.697	25.04	1792.09	25.04	957.78
25.05	1920.08	25.05	2019.44	25.05	651.111	25.05	640.648
25.06	-13.6566	25.06	310.674	25.06	934.656	25.06	-402.184
25.07	1737.87	25.07	1343.17	25.07	1632.76	25.07	749.554
25.08	1146.77	25.08	1448.56	25.08	450.431	25.08	1203.59
25.09	1820.66	25.09	1942.7	25.09	366.73	25.09	-46.3701
25.1	1805.62	25.1	1422.54	25.1	726.749	25.1	1114.2
25.11	1071.56	25.11	-285.523	25.11	860.978	25.11	992.041
25.12	1765.49	25.12	10.823	25.12	2081.97	25.12	2288.55
25.13	2268.08	25.13	-14.5173	25.13	1754.44	25.13	758.428
25.14	709.258	25.14	726.988	25.14	2364.22	25.14	12.9756
25.15	175.763	25.15	76.9572	25.15	909.683	25.15	1519.86
25.16	1444.04	25.16	1291.65	25.16	-142.98	25.16	388.9
25.17	1177.08	25.17	2274.35	25.17	1598.89	25.17	428.689
25.18	1762.07	25.18	2768.35	25.18	2118.81	25.18	70.1306
25.19	1036.55	25.19	1410.64	25.19	1427.15	25.19	1024.88
25.2	1150.28	25.2	1098.6	25.2	890.393	25.2	103.015
25.21	1392	25.21	2868.97	25.21	981.282	25.21	1284.14
25.22	2794.25	25.22	1195.68	25.22	1043.32	25.22	-104.961
25.23	1999.22	25.23	2378.09	25.23	651.12	25.23	1199.89
25.24	2169.92	25.24	-69.1194	25.24	2460.75	25.24	1671.16
25.25	2619.24	25.25	2888.45	25.25	897.122	25.25	365.427
25.26	2281.79	25.26	1448.72	25.26	1650.18	25.26	-128.502
25.27	486.465	25.27	1806.4	25.27	941.452	25.27	681.241
25.28	641.463	25.28	1402.72	25.28	716.42	25.28	1913.48
25.29	2227.25	25.29	1197.95	25.29	1858.99	25.29	686.794
25.3	796.333	25.3	1296.09	25.3	1496.51	25.3	470.638
25.31	2278.96	25.31	-197.006	25.31	1015.11	25.31	891.091
25.32	1734.53	25.32	1718.46	25.32	1647.47	25.32	507.318
25.33	1683.16	25.33	244.752	25.33	1660.45	25.33	1204.27
25.34	2265.64	25.34	288.113	25.34	738.758	25.34	1473.78
25.35	1253.96	25.35	1647.56	25.35	1606.37	25.35	-708.03
25.36	763.801	25.36	656.501	25.36	592.007	25.36	-1626.01
25.37	1496.03	25.37	1277.51	25.37	709.415	25.37	-1446.54
25.38	1545.77	25.38	1066.83	25.38	914.461	25.38	127.832
25.39	2181.02	25.39	2005.44	25.39	1885.99	25.39	766.937
25.4	2191.22	25.4	615.742	25.4	1957.01	25.4	1183.16
25.41	1259.11	25.41	1099	25.41	1345.67	25.41	-1376.4
25.42	359.954	25.42	-8.75343	25.42	1118.56	25.42	732.058
25.43	1002.74	25.43	-380.002	25.43	1022.36	25.43	1135.26
25.44	199.241	25.44	1218.15	25.44	1644.59	25.44	1556.26
25.45	1628.92	25.45	1743.23	25.45	1886.11	25.45	-783.958
25.46	1002.11	25.46	-158.942	25.46	604.856	25.46	20.7553
25.47	2695.06	25.47	1524.05	25.47	226.005	25.47	726.299
25.48	1812.15	25.48	968.645	25.48	1587.83	25.48	51.3675
25.49	1060.67	25.49	343.555	25.49	588.883	25.49	125.746
25.5	1761.42	25.5	189.98	25.5	924.964	25.5	229.343
25.51	125.881	25.51	1874.89	25.51	1316.76	25.51	363.916
25.52	1419.35	25.52	734.914	25.52	980.882	25.52	548.542
25.53	1789.46	25.53	1794.57	25.53	-210.423	25.53	1374.61
25.54	884.757	25.54	1567.62	25.54	825.801	25.54	373.223
25.55	1971.9	25.55	1527.71	25.55	2337.2	25.55	-202.705
25.56	1452.93	25.56	1192.3	25.56	410.326	25.56	-50.6639
25.57	1025.22	25.57	1430.32	25.57	1092.17	25.57	680.916
25.58	860.649	25.58	2267.42	25.58	1581.41	25.58	1684.62
25.59	1254.21	25.59	2972.53	25.59	1427.62	25.59	853.541
25.6	925.386	25.6	974.966	25.6	1017.41	25.6	765.709
25.61	60.5858	25.61	872.871	25.61	1051	25.61	854.785
25.62	326.44	25.62	1609.04	25.62	2905.08	25.62	1091.16
25.63	383.936	25.63	831.904	25.63	2379.15	25.63	1582.14
25.64	-154.22	25.64	2054.07	25.64	1301.35	25.64	100.06
25.65	1288.12	25.65	1922.06	25.65	1186.35	25.65	-393.996
25.66	696.552	25.66	1185.82	25.66	3113.39	25.66	497.3
25.67	439.682	25.67	1407.68	25.67	620.152	25.67	-746.446
25.68	928.323	25.68	1489.89	25.68	-241.03	25.68	-74.8409
25.69	1131.29	25.69	1958.67	25.69	1455.29	25.69	541.794
25.7	1902.9	25.7	724.717	25.7	791.857	25.7	1609.65
25.71	1632.95	25.71	385.825	25.71	2630.91	25.71	2030.31
25.72	1569.44	25.72	668.008	25.72	313.121	25.72	1963
25.73	1534.79	25.73	1139.27	25.73	716.845	25.73	1078.64
25.74	1038.06	25.74	-288.154	25.74	825.907	25.74	-22.3904
25.75	2237.83	25.75	426.978	25.75	2744.39	25.75	-766.423
25.76	1304.08	25.76	1339.35	25.76	1754.89	25.76	-113.282
25.77	1217.92	25.77	-171.672	25.77	1676.46	25.77	-436.067
25.78	824.154	25.78	983.447	25.78	518.148	25.78	577.891
25.79	1073.51	25.79	946.391	25.79	-256.543	25.79	1030.14
25.8	468.819	25.8	533.131	25.8	1401.78	25.8	-255.363
25.81	688.472	25.81	1202.85	25.81	760.192	25.81	822.111
25.82	1092.12	25.82	-204.415	25.82	942.23	25.82	1617.81
25.83	2258.35	25.83	2118.83	25.83	1977.83	25.83	431.389
25.84	1990.24	25.84	2222.73	25.84	1572.54	25.84	1500.1
25.85	1892.72	25.85	1122.23	25.85	1113.19	25.85	-700.902
25.86	920.479	25.86	690.871	25.86	1202.14	25.86	31.6315
25.87	882.555	25.87	1094.24	25.87	1638.44	25.87	344.256
25.88	700.421	25.88	491.568	25.88	2223.25	25.88	940.929
25.89	1440.68	25.89	897.171	25.89	1232.98	25.89	251.385
25.9	2075.57	25.9	1127.59	25.9	996.492	25.9	-406.173
25.91	544.525	25.91	1630.57	25.91	2089.85	25.91	-816.824
25.92	1958.1	25.92	515.076	25.92	870.281	25.92	903.086
25.93	1960.26	25.93	1334.04	25.93	2421.51	25.93	2799
25.94	2634.42	25.94	1886.98	25.94	1637.91	25.94	1147.14
25.95	749.18	25.95	1416.27	25.95	119.764	25.95	364.291
25.96	2301.03	25.96	1617.62	25.96	779.657	25.96	599.52
25.97	1801.06	25.97	2042.99	25.97	1169.54	25.97	2069.42
25.98	1460.11	25.98	1395.49	25.98	792.691	25.98	1359.33
25.99	1167.79	25.99	1002.59	25.99	1164.02	25.99	977.425
26	1426.45	26	842.816	26	-39.6624	26	-821.543
26.01	682.677	26.01	2075.66	26.01	314.117	26.01	1889.87
26.02	1875.14	26.02	943.604	26.02	2085.78	26.02	2202.94
26.03	595.271	26.03	1709.01	26.03	561.386	26.03	495.121
26.04	687.174	26.04	1218.84	26.04	1791.84	26.04	-25.4901
26.05	1601.24	26.05	3512.15	26.05	52.7732	26.05	780.519
26.06	1285.04	26.06	-46.1782	26.06	1001.28	26.06	295.266
26.07	2395.65	26.07	1141.76	26.07	3033.96	26.07	-374.636
26.08	315.407	26.08	1672.43	26.08	1701.61	26.08	-864.007
26.09	728.54	26.09	1570.04	26.09	651.807	26.09	237.611
26.1	1665.45	26.1	1855.89	26.1	-614.918	26.1	-24.0358
26.11	1245.07	26.11	1306.56	26.11	1278.45	26.11	859.272
26.12	437.637	26.12	962.272	26.12	312.26	26.12	-103.566
26.13	2909.58	26.13	1837.21	26.13	833.962	26.13	776.356
26.14	331.719	26.14	1446.31	26.14	1868.38	26.14	961.819
26.15	1151.33	26.15	1195	26.15	1767.67	26.15	1782.02
26.16	2072.13	26.16	1970.49	26.16	852.553	26.16	823.773
26.17	2375.09	26.17	416.625	26.17	1043.75	26.17	-641.253
26.18	944.887	26.18	2540.43	26.18	237.404	26.18	435.069
26.19	868.684	26.19	-162.952	26.19	379.464	26.19	310.779
26.2	2226.13	26.2	641.63	26.2	2163.88	26.2	1098.15
26.21	1822.85	26.21	561.569	26.21	1889.04	26.21	606.099
26.22	2504.33	26.22	2474.27	26.22	3408.14	26.22	-426.388
26.23	1971.6	26.23	17.6043	26.23	2350.64	26.23	2353.14
26.24	2041.4	26.24	-144.595	26.24	1575.73	26.24	537.917
26.25	2373.58	26.25	572.565	26.25	-50.5024	26.25	917.982
26.26	1914.88	26.26	2205.07	26.26	-254.994	26.26	1080.74
26.27	836.866	26.27	2046.7	26.27	873.274	26.27	1672.97
26.28	1173.14	26.28	1365.67	26.28	639.459	26.28	1194.74
26.29	1363.29	26.29	1543.79	26.29	1403.17	26.29	374.976
26.3	1821.07	26.3	-22.4502	26.3	1894.33	26.3	1804.45
26.31	1185.57	26.31	1090.42	26.31	1570.33	26.31	807.34
26.32	2485.85	26.32	583.22	26.32	1908.1	26.32	-506.924
26.33	2172.68	26.33	777.489	26.33	1181.23	26.33	784.795
26.34	2757.63	26.34	971.54	26.34	1186.62	26.34	1796.23
26.35	2042.18	26.35	321.425	26.35	1572.57	26.35	1194.91
26.36	2945.91	26.36	840.313	26.36	911.781	26.36	199.692
26.37	3148.28	26.37	1566	26.37	1085.76	26.37	1410.6
26.38	2062.91	26.38	-346.663	26.38	1201.22	26.38	1693.72
26.39	3569.09	26.39	503.267	26.39	894.789	26.39	802.473
26.4	1260.4	26.4	885.983	26.4	1850.47	26.4	1565.12
26.41	2264.92	26.41	1796.82	26.41	475.447	26.41	1430.52
26.42	1332.92	26.42	1729.03	26.42	1534.55	26.42	926.12
26.43	812.928	26.43	340.337	26.43	1980.12	26.43	1658.54
26.44	1684.5	26.44	285.804	26.44	-52.4858	26.44	1154.53
26.45	1874.58	26.45	2487.99	26.45	791.388	26.45	-260.382
26.46	960.854	26.46	1531.72	26.46	2452.47	26.46	1450.92
26.47	305.549	26.47	430.196	26.47	2312.69	26.47	630.641
26.48	1682.52	26.48	1063.37	26.48	1374.28	26.48	1719.29
26.49	1692.48	26.49	890.561	26.49	-5.53299	26.49	2949.09
26.5	557.495	26.5	1376.76	26.5	1293.18	26.5	860.785
26.51	912.294	26.51	909.817	26.51	705.439	26.51	593.357
26.52	2709.63	26.52	1569.27	26.52	124.485	26.52	933.273
26.53	844.756	26.53	1177.69	26.53	-185.877	26.53	711.301
26.54	985.265	26.54	656.083	26.54	1154.7	26.54	286.776
26.55	1303.54	26.55	1479.25	26.55	1356.55	26.55	228.847
26.56	1486.26	26.56	1258.67	26.56	-29.833	26.56	1525.54
26.57	518.659	26.57	-109.522	26.57	729.239	26.57	999.395
26.58	1269.17	26.58	502.168	26.58	1095.28	26.58	418.822
26.59	2264.2	26.59	854.645	26.59	1147.37	26.59	-680.025
26.6	2077.86	26.6	1817.8	26.6	2081.14	26.6	-103.338
26.61	988.412	26.61	998.076	26.61	502.649	26.61	-796.157
26.62	1202.1	26.62	673.496	26.62	639.992	26.62	91.5063
26.63	1771.24	26.63	1618.35	26.63	1525.35	26.63	515.432
26.64	1341.24	26.64	2015.5	26.64	1546.96	26.64	185.062
26.65	2049.22	26.65	1683.09	26.65	551.804	26.65	1874.06
26.66	242.386	26.66	483.32	26.66	2856.47	26.66	1700.71
26.67	269.946	26.67	778.467	26.67	1382.29	26.67	2373.45
26.68	1234.23	26.68	-248.141	26.68	108.388	26.68	1612.14
26.69	1533.15	26.69	-162.132	26.69	1560.54	26.69	772.095
26.7	2342.76	26.7	2242.45	26.7	1139.64	26.7	445.084
26.71	867.655	26.71	2687.59	26.71	517.101	26.71	110.058
26.72	1719.44	26.72	1025.02	26.72	1311.74	26.72	1580.47
26.73	82.2839	26.73	799.834	26.73	1668.79	26.73	1144.33
26.74	1096.77	26.74	774.554	26.74	2647.43	26.74	-222.656
26.75	1064.52	26.75	-505.156	26.75	1016.6	26.75	1510.2
26.76	1512.85	26.76	1596.11	26.76	716.236	26.76	2158.84
26.77	787.958	26.77	2093.69	26.77	338.582	26.77	895.998
26.78	1000.7	26.78	2723.69	26.78	1692.11	26.78	279.664
26.79	1758.57	26.79	792.331	26.79	331.108	26.79	54.7359
26.8	1612.46	26.8	110.287	26.8	1498.35	26.8	126.344
26.81	3277.1	26.81	792.611	26.81	799.502	26.81	978.09
26.82	2064.03	26.82	1698.9	26.82	-104.05	26.82	923.715
26.83	1538.53	26.83	1031.86	26.83	2480.72	26.83	974.139
26.84	1358.83	26.84	1459.35	26.84	-107.856	26.84	622.036
26.85	1291.48	26.85	737.064	26.85	2194.02	26.85	2045.99
26.86	1221.52	26.86	1167.68	26.86	1254.63	26.86	1912.27
26.87	2449.59	26.87	1612.82	26.87	1006.36	26.87	1329
26.88	2186.48	26.88	2808.41	26.88	1433.06	26.88	2705.24
26.89	1728.82	26.89	2380.85	26.89	1854.04	26.89	167.207
26.9	911.174	26.9	1407.89	26.9	1083.69	26.9	1288.37
26.91	9.1444	26.91	1497.05	26.91	1534.59	26.91	1188.12
26.92	1542.47	26.92	1601.21	26.92	632.456	26.92	236.141
26.93	1557.28	26.93	794.251	26.93	688.64	26.93	-112.231
26.94	1347.09	26.94	1922.75	26.94	828.975	26.94	759.202
26.95	1143.39	26.95	1038.57	26.95	485.303	26.95	1510.82
26.96	660.344	26.96	1236.67	26.96	1709.04	26.96	427.627
26.97	1540.71	26.97	1579.05	26.97	901.298	26.97	-130.387
26.98	1799.28	26.98	-136.422	26.98	1625.39	26.98	520.408
26.99	2124.12	26.99	1768.48	26.99	825.015	26.99	-37.0919
27	787.327	27	261.381	27	1382.51	27	525.493
27.01	2750.98	27.01	984.789	27.01	971.29	27.01	936.958
27.02	591.351	27.02	1246.99	27.02	1118.75	27.02	-117.722
27.03	2242.8	27.03	904.421	27.03	2121.71	27.03	717.519
27.04	713.532	27.04	1951.89	27.04	1456.65	27.04	-107.279
27.05	2044.38	27.05	2034.08	27.05	594.172	27.05	-31.3668
27.06	179.883	27.06	1999.19	27.06	1588.43	27.06	297.462
27.07	407.694	27.07	1117.26	27.07	881.571	27.07	-442.085
27.08	1224.58	27.08	298.907	27.08	72.5142	27.08	-399.383
27.09	1199.24	27.09	1751.65	27.09	729.044	27.09	1911.88
27.1	893.852	27.1	2058.67	27.1	1333.11	27.1	1009.81
27.11	1799.86	27.11	1395.54	27.11	-324.782	27.11	-65.5114
27.12	1482.79	27.12	1140.45	27.12	1573.64	27.12	585.14
27.13	1259.64	27.13	1376.58	27.13	2250.03	27.13	479.554
27.14	48.5366	27.14	1476.19	27.14	1168.71	27.14	1634.88
27.15	1892.14	27.15	1500.55	27.15	-647.196	27.15	-636.076
27.16	1893.31	27.16	1840	27.16	2302.7	27.16	885.415
27.17	2328	27.17	1887.42	27.17	1500.58	27.17	1505.82
27.18	2412.65	27.18	2536.86	27.18	1744.75	27.18	813.372
27.19	1274.6	27.19	1352.83	27.19	119.645	27.19	1881.95
27.2	352.277	27.2	964.239	27.2	920.816	27.2	1234.7
27.21	638.809	27.21	1660.37	27.21	614.927	27.21	1775.65
27.22	3000.44	27.22	1422.53	27.22	2156.21	27.22	337.585
27.23	940.72	27.23	210.808	27.23	25.6196	27.23	1604.47
27.24	2138.97	27.24	2110.1	27.24	180.382	27.24	354.546
27.25	965.404	27.25	1176.61	27.25	814.252	27.25	350.653
27.26	1524.34	27.26	1805.01	27.26	1537.8	27.26	1961.88
27.27	1998.49	27.27	2494.47	27.27	409.84	27.27	-208.168
27.28	595.136	27.28	1735.27	27.28	-58.484	27.28	1206.44
27.29	1458.31	27.29	1754.24	27.29	437.658	27.29	1320.64
27.3	1055.9	27.3	1366.99	27.3	869.09	27.3	2440.67
27.31	243.185	27.31	1606.84	27.31	1450.85	27.31	776.932
27.32	991.745	27.32	1119.79	27.32	474.336	27.32	955.552
27.33	647.655	27.33	1146.25	27.33	218.47	27.33	1973.68
27.34	1213.87	27.34	1677.62	27.34	991.051	27.34	812.115
27.35	1102.61	27.35	2338.22	27.35	1753.13	27.35	616.757
27.36	2017.83	27.36	1655.67	27.36	236.815	27.36	1928.21
27.37	576.643	27.37	2517.23	27.37	1179.59	27.37	1865.44
27.38	1317.91	27.38	3246.54	27.38	564.239	27.38	3271.34
27.39	1628.03	27.39	1851.55	27.39	891.436	27.39	2741.29
27.4	1129.7	27.4	-353.71	27.4	1258.39	27.4	586.961
27.41	973.242	27.41	2099.72	27.41	587.396	27.41	1503.69
27.42	1846.29	27.42	1832.76	27.42	466.708	27.42	752.815
27.43	1280.79	27.43	682.605	27.43	1353.22	27.43	2965.97
27.44	715.942	27.44	2032.24	27.44	218.664	27.44	2043.79
27.45	1080.99	27.45	-506.086	27.45	325.835	27.45	1947.08
27.46	1379.46	27.46	2337.48	27.46	152.234	27.46	1399.16
27.47	699.508	27.47	1232.24	27.47	982.204	27.47	583.344
27.48	1595.32	27.48	1375.9	27.48	-576.022	27.48	499.198
27.49	1842.12	27.49	2423.46	27.49	1092.74	27.49	1006.74
27.5	746.144	27.5	172.534	27.5	1676.71	27.5	441.816
27.51	2177.13	27.51	2.31571	27.51	1929.73	27.51	1177.05
27.52	1953.08	27.52	1964.37	27.52	1804	27.52	1099.43
27.53	911.478	27.53	1322.96	27.53	-25.4154	27.53	118.138
27.54	1032.56	27.54	1318.48	27.54	1137.55	27.54	701.453
27.55	1582.09	27.55	2765.33	27.55	949.294	27.55	2213.61
27.56	1589.65	27.56	1760.9	27.56	37.0767	27.56	2035.02
27.57	248.54	27.57	1164.97	27.57	1014.84	27.57	233.596
27.58	1292	27.58	700.011	27.58	1326.56	27.58	1544.52
27.59	797.127	27.59	234.526	27.59	1206.76	27.59	1401.47
27.6	-45.0361	27.6	54.1583	27.6	192.433	27.6	1631.55
27.61	1300.66	27.61	1187.75	27.61	1220.35	27.61	195.974
27.62	896.09	27.62	2897.47	27.62	1633.56	27.62	898.883
27.63	2324.57	27.63	1169.57	27.63	1671.03	27.63	325.667
27.64	2012.93	27.64	253.452	27.64	542.661	27.64	841.064
27.65	1046.24	27.65	2116.76	27.65	864.862	27.65	1302.43
27.66	87.7585	27.66	-221.558	27.66	1179.75	27.66	348.675
27.67	384.288	27.67	2324.88	27.67	1033.25	27.67	988.473
27.68	1431.93	27.68	982.615	27.68	1263.98	27.68	818.108
27.69	1879.22	27.69	1058.13	27.69	915.187	27.69	1626.31
27.7	2015.68	27.7	100.61	27.7	914.051	27.7	2210.04
27.71	487.271	27.71	1447.1	27.71	1940.32	27.71	420.55
27.72	1402.81	27.72	2335.83	27.72	9.71867	27.72	2160.17
27.73	2120.15	27.73	908.068	27.73	563.706	27.73	1576.12
27.74	-27.3848	27.74	-60.6853	27.74	1631.84	27.74	509.853
27.75	-907.343	27.75	929.888	27.75	752.496	27.75	2418.43
27.76	838.972	27.76	1218.03	27.76	1319.57	27.76	1115.35
27.77	255.638	27.77	3264.96	27.77	1860.86	27.77	950.934
27.78	1526.76	27.78	1668.44	27.78	1235.17	27.78	1419.33
27.79	1707.19	27.79	1206.49	27.79	1410.08	27.79	745.621
27.8	1174.56	27.8	1308.48	27.8	1739.92	27.8	2260.65
27.81	829.777	27.81	1128.86	27.81	1408.77	27.81	1759.83
27.82	2014.18	27.82	1882.08	27.82	1113.49	27.82	2320.96
27.83	1096.71	27.83	1508.32	27.83	1662.25	27.83	1715.63
27.84	732.113	27.84	834.178	27.84	469.843	27.84	1065.41
27.85	1750.11	27.85	1632.22	27.85	1036.49	27.85	1662.44
27.86	2045.08	27.86	2232.51	27.86	1316.03	27.86	2982.1
27.87	1593.26	27.87	1013.01	27.87	968.899	27.87	732.125
27.88	1580.45	27.88	1268.65	27.88	1920.22	27.88	656.956
27.89	2864.62	27.89	-871.108	27.89	2031.81	27.89	-158.037
27.9	1742.2	27.9	1325.19	27.9	1259.06	27.9	1467.78
27.91	610.008	27.91	690.067	27.91	152.665	27.91	823.173
27.92	801.003	27.92	1860.36	27.92	2476.14	27.92	1617.64
27.93	1535.83	27.93	687.066	27.93	2340.64	27.93	994.306
27.94	426.103	27.94	362.557	27.94	2777.73	27.94	1342.41
27.95	1722.85	27.95	-213.829	27.95	1941.47	27.95	894.612
27.96	1984.59	27.96	742.248	27.96	1150.71	27.96	2001.57
27.97	649.279	27.97	424.052	27.97	440.566	27.97	1756.48
27.98	1976.96	27.98	1080.82	27.98	583.193	27.98	1436.5
27.99	1216.81	27.99	658.166	27.99	812.295	27.99	1406.45
28	2547.14	28	719.485	28	1624.23	28	2162.85
28.01	2169.78	28.01	1920.52	28.01	317.764	28.01	1626.88
28.02	1444.29	28.02	748.212	28.02	508.249	28.02	1020.82
28.03	1765.3	28.03	1453.03	28.03	2432.74	28.03	2111.06
28.04	1012.59	28.04	2028	28.04	-209.707	28.04	601.937
28.05	874.478	28.05	1602.49	28.05	890.736	28.05	811.357
28.06	2017.84	28.06	1852.17	28.06	853.506	28.06	1109.74
28.07	1239.16	28.07	1599.15	28.07	2637.48	28.07	1848.11
28.08	2184.77	28.08	52.8668	28.08	1082.93	28.08	1758.15
28.09	2364.18	28.09	847.899	28.09	630.58	28.09	168.082
28.1	1296.57	28.1	1923.88	28.1	1539.46	28.1	-300.274
28.11	1589.82	28.11	1380.29	28.11	388.936	28.11	-520.635
28.12	582.411	28.12	342.961	28.12	3252.66	28.12	459.983
28.13	2053.08	28.13	1845.45	28.13	585.733	28.13	691.103
28.14	652.179	28.14	3233.49	28.14	1077.28	28.14	711.37
28.15	2017.57	28.15	2843.37	28.15	1930.95	28.15	727.106
28.16	1442.79	28.16	1343.53	28.16	519.06	28.16	1488.65
28.17	1789.19	28.17	1380.19	28.17	685.024	28.17	1468.12
28.18	2135.72	28.18	886.555	28.18	947.283	28.18	653.486
28.19	2420.95	28.19	1941.87	28.19	2162.68	28.19	1597.92
28.2	597.483	28.2	670.422	28.2	1932.75	28.2	454.703
28.21	418.902	28.21	353.049	28.21	1100.16	28.21	1063.94
28.22	715.06	28.22	1005.31	28.22	1321.24	28.22	1578.77
28.23	1628.1	28.23	2180.54	28.23	1358.37	28.23	2941.44
28.24	1068.27	28.24	1981.78	28.24	721.43	28.24	1989.61
28.25	1475.21	28.25	2048.17	28.25	614.461	28.25	427.77
28.26	1846.9	28.26	2148.9	28.26	1047.15	28.26	-67.8159
28.27	1734.88	28.27	374.84	28.27	618.155	28.27	824.495
28.28	675.934	28.28	567.698	28.28	1250.38	28.28	1993.4
28.29	337.929	28.29	1569.96	28.29	-190.881	28.29	1720.77
28.3	2564.49	28.3	2624.42	28.3	2209.55	28.3	1043.03
28.31	1645.36	28.31	1834.83	28.31	2141.65	28.31	1742.71
28.32	1736.82	28.32	2081.85	28.32	2193.27	28.32	1569.74
28.33	1147.29	28.33	1550.62	28.33	2391.06	28.33	332.718
28.34	2082.11	28.34	1327.54	28.34	1093.19	28.34	2232.22
28.35	2103.11	28.35	757.988	28.35	387.388	28.35	446.819
28.36	823.043	28.36	2100.2	28.36	468.387	28.36	567.067
28.37	2558.67	28.37	2017.64	28.37	-423.517	28.37	1563.9
28.38	1340.71	28.38	2482.15	28.38	1378.01	28.38	469.586
28.39	2476.53	28.39	860.485	28.39	2096.14	28.39	1003.23
28.4	2069.73	28.4	1941.61	28.4	558.055	28.4	304.918
28.41	627.234	28.41	40.7157	28.41	690.975	28.41	1653.41
28.42	1863.36	28.42	1820.75	28.42	1744.94	28.42	891.552
28.43	1837.74	28.43	2442.67	28.43	1697.96	28.43	286.097
28.44	573.284	28.44	1486.37	28.44	1364.17	28.44	1846.54
28.45	2569.57	28.45	3224.14	28.45	1252.15	28.45	1367.48
28.46	2324.09	28.46	2091.85	28.46	1928.53	28.46	268.805
28.47	2389.57	28.47	1866.87	28.47	669.628	28.47	1479.88
28.48	1167.51	28.48	1137.57	28.48	1013.84	28.48	119.202
28.49	1729.7	28.49	1537.47	28.49	1174.8	28.49	1690.07
28.5	1508.65	28.5	2231.59	28.5	1071.33	28.5	1499.62
28.51	2554.64	28.51	1184.96	28.51	470.328	28.51	1086.83
28.52	810.276	28.52	2717.5	28.52	1724.71	28.52	1719.54
28.53	795.504	28.53	4014.91	28.53	50.9531	28.53	1761.68
28.54	1490.34	28.54	1524.83	28.54	1093.6	28.54	1320.62
28.55	1384.12	28.55	1730.16	28.55	1890.53	28.55	622.887
28.56	2087.29	28.56	2382.58	28.56	922.991	28.56	1479.05
28.57	1599.46	28.57	2893.32	28.57	584.16	28.57	1167.03
28.58	1168.33	28.58	1716.57	28.58	1853.91	28.58	1308.43
28.59	1331.82	28.59	844.456	28.59	1496.46	28.59	857.151
28.6	2190.48	28.6	2305.2	28.6	1525.99	28.6	-60.1663
28.61	1560.42	28.61	1128.85	28.61	1738.12	28.61	1458.49
28.62	22.8829	28.62	1471.64	28.62	1616.18	28.62	79.2609
28.63	1354.2	28.63	1452.11	28.63	539.541	28.63	777.75
28.64	1230.37	28.64	-75.0651	28.64	891.302	28.64	992.867
28.65	1522.89	28.65	1670.53	28.65	988.19	28.65	369.384
28.66	2005.4	28.66	93.5872	28.66	1806.45	28.66	2149.43
28.67	3166.28	28.67	-138.737	28.67	1234.03	28.67	269.769
28.68	1596.45	28.68	1457.98	28.68	857.812	28.68	2513.14
28.69	446.139	28.69	1578.88	28.69	1832.29	28.69	1372.35
28.7	1506.76	28.7	-146.549	28.7	373.265	28.7	1542.58
28.71	1402.97	28.71	997.816	28.71	170.889	28.71	923.506
28.72	2527.43	28.72	1754.92	28.72	404.502	28.72	1112.01
28.73	711.459	28.73	1581.81	28.73	2096.34	28.73	688.18
28.74	1824.18	28.74	1366.27	28.74	1089.81	28.74	174.196
28.75	650.658	28.75	2236.46	28.75	775.554	28.75	1203.08
28.76	1580.55	28.76	748.171	28.76	1648.32	28.76	2365.22
28.77	2699.81	28.77	1902.92	28.77	1265.95	28.77	1133.78
28.78	965.396	28.78	2464.23	28.78	1443.64	28.78	876.246
28.79	1462.01	28.79	999.678	28.79	-73.3459	28.79	510.218
28.8	1364.1	28.8	1485.45	28.8	846.394	28.8	550.934
28.81	342.179	28.81	2356.04	28.81	1850.8	28.81	6.11629
28.82	230.818	28.82	865.837	28.82	466.4	28.82	2546.32
28.83	1244.32	28.83	716.065	28.83	515.512	28.83	2175.94
28.84	1922.74	28.84	977.81	28.84	1528.56	28.84	1126.32
28.85	410.852	28.85	2231.36	28.85	2076.06	28.85	548.87
28.86	1436.9	28.86	1691.75	28.86	2561.22	28.86	3597.68
28.87	1609.54	28.87	1547.73	28.87	1633.04	28.87	510.504
28.88	1547.33	28.88	1895.84	28.88	1398.15	28.88	1914.63
28.89	1305.28	28.89	1522.09	28.89	1152.92	28.89	975.296
28.9	347.983	28.9	425.344	28.9	2316.04	28.9	1261.44
28.91	1742.78	28.91	1699.55	28.91	1038.79	28.91	1778.09
28.92	2243.26	28.92	1939.8	28.92	333.189	28.92	-315.476
28.93	2988.47	28.93	744.537	28.93	856.563	28.93	2660.43
28.94	2408.64	28.94	1610.39	28.94	38.2865	28.94	2589.41
28.95	1595.51	28.95	1074.49	28.95	-23.7367	28.95	2338.63
28.96	892.013	28.96	1935.48	28.96	1440.91	28.96	1885.71
28.97	1066.04	28.97	1209.33	28.97	2125.25	28.97	2106.17
28.98	1668.91	28.98	-278.391	28.98	1118.11	28.98	856.214
28.99	2484.17	28.99	1761.46	28.99	411.002	28.99	2789.98
29	1365.11	29	1071.18	29	774.916	29	1198.87
29.01	1424.47	29.01	2044.73	29.01	347.512	29.01	1061.75
29.02	1651.89	29.02	1790.29	29.02	308.136	29.02	758.089
29.03	1331.54	29.03	675.051	29.03	827.997	29.03	1250.82
29.04	771.942	29.04	1724.22	29.04	2154.74	29.04	23.8117
29.05	1881.56	29.05	2482.17	29.05	1312.99	29.05	139.729
29.06	1729.79	29.06	1902.47	29.06	2188.82	29.06	745.172
29.07	1471.09	29.07	1639.94	29.07	1805.81	29.07	705.654
29.08	2073.28	29.08	2293.56	29.08	1520.96	29.08	1807.4
29.09	924.052	29.09	2664.68	29.09	1213.28	29.09	137.646
29.1	1051.26	29.1	610.122	29.1	1549.7	29.1	925.589
29.11	2018.61	29.11	1574.51	29.11	1558.09	29.11	856.696
29.12	3247.06	29.12	1748.3	29.12	1614.38	29.12	2205.88
29.13	2011.56	29.13	1552.28	29.13	881.02	29.13	887.21
29.14	1358.7	29.14	584.184	29.14	1819.67	29.14	892.972
29.15	617.849	29.15	1639.56	29.15	1498.78	29.15	1018.7
29.16	1180.01	29.16	2151.25	29.16	1480.36	29.16	1565.26
29.17	1531.53	29.17	2590.46	29.17	1763.5	29.17	1567.82
29.18	36.9751	29.18	2760.6	29.18	473.869	29.18	1664.48
29.19	1019.5	29.19	1533.36	29.19	1220.27	29.19	485.433
29.2	732.697	29.2	670.909	29.2	487.043	29.2	830.283
29.21	-412.619	29.21	1591.56	29.21	1617.73	29.21	7.21009
29.22	276.56	29.22	2340.43	29.22	1840.24	29.22	632.073
29.23	782.4	29.23	2068.49	29.23	1840.19	29.23	1705.15
29.24	2624.97	29.24	416.009	29.24	1768.72	29.24	302.314
29.25	982.451	29.25	3231.08	29.25	2085.91	29.25	334.879
29.26	919.583	29.26	1159.26	29.26	1297.45	29.26	977.008
29.27	1890.75	29.27	1512.04	29.27	1463.51	29.27	576.839
29.28	1558.43	29.28	1882.41	29.28	1605.79	29.28	1594.87
29.29	443.852	29.29	1767.79	29.29	530.269	29.29	1655.8
29.3	612.875	29.3	-976.308	29.3	1988.58	29.3	1365.97
29.31	851.713	29.31	129.43	29.31	136.085	29.31	226.748
29.32	1087.01	29.32	1463.33	29.32	1210.6	29.32	-3.08291
29.33	2648.4	29.33	114.386	29.33	1580.93	29.33	992.229
29.34	2438.08	29.34	1978	29.34	1358.62	29.34	1566.49
29.35	1665.4	29.35	1698.31	29.35	2187.92	29.35	1543.79
29.36	1900.8	29.36	566.453	29.36	1644.6	29.36	512.809
29.37	2163.98	29.37	2465.59	29.37	2397.99	29.37	1549.45
29.38	1827.4	29.38	2418.25	29.38	1524.03	29.38	936.246
29.39	2428.98	29.39	-274.634	29.39	1464.26	29.39	843.343
29.4	752.588	29.4	142.168	29.4	2388.62	29.4	2218.08
29.41	1228.49	29.41	1469.98	29.41	1309.41	29.41	1991.88
29.42	534.108	29.42	-100.317	29.42	1546.52	29.42	2001.4
29.43	339.885	29.43	1384.22	29.43	1901.03	29.43	1510.04
29.44	1395.48	29.44	1268.41	29.44	1645.01	29.44	1945.6
29.45	135.259	29.45	1427.77	29.45	911.311	29.45	1141.01
29.46	1848.82	29.46	41.5077	29.46	-125.631	29.46	1488.59
29.47	785.912	29.47	2040.4	29.47	502.109	29.47	2791.47
29.48	1341.88	29.48	982.277	29.48	1357.97	29.48	1467.85
29.49	775.378	29.49	817.325	29.49	2583.89	29.49	959.267
29.5	1764.3	29.5	1662.97	29.5	903.138	29.5	1337.93
29.51	229.111	29.51	131.265	29.51	2265.73	29.51	426.181
29.52	1053.44	29.52	1110.23	29.52	1203.06	29.52	896.331
29.53	2189.11	29.53	1648.78	29.53	1778.27	29.53	1156.72
29.54	177.719	29.54	1926.16	29.54	1887.18	29.54	286.39
29.55	1692.18	29.55	1775.88	29.55	2506.67	29.55	915.328
29.56	1635.35	29.56	648.148	29.56	2486.28	29.56	743.147
29.57	1460.83	29.57	1016.24	29.57	2443.66	29.57	1377.14
29.58	1433.96	29.58	431.906	29.58	-69.7209	29.58	3109.87
29.59	2367.32	29.59	1526.18	29.59	1349.08	29.59	888.929
29.6	2018.74	29.6	823.788	29.6	174.706	29.6	1290.52
29.61	1557.67	29.61	2225.39	29.61	1891.96	29.61	1214.25
29.62	572.768	29.62	1863.93	29.62	999.289	29.62	3149.2
29.63	1663.92	29.63	1877.58	29.63	1135.9	29.63	213.779
29.64	253.334	29.64	2866.78	29.64	1377.41	29.64	1808.84
29.65	2164.44	29.65	1622.69	29.65	1796.14	29.65	2611.44
29.66	1735.54	29.66	629.108	29.66	1924.01	29.66	664.332
29.67	722.74	29.67	1420.24	29.67	1598.49	29.67	948.252
29.68	-46.9803	29.68	1896	29.68	1068.46	29.68	1669.6
29.69	1749.48	29.69	977.015	29.69	1055.4	29.69	-836.488
29.7	2922.58	29.7	537.688	29.7	1456.27	29.7	1121.01
29.71	515.382	29.71	2336.84	29.71	1295.08	29.71	1310.55
29.72	1577.32	29.72	2913.53	29.72	473.672	29.72	174.593
29.73	-29.4042	29.73	431.36	29.73	1308.8	29.73	139.052
29.74	919.635	29.74	429.386	29.74	2790.07	29.74	972.542
29.75	1450.78	29.75	666.276	29.75	2160.41	29.75	1338.9
29.76	1525.51	29.76	748.681	29.76	-43.2619	29.76	1544.06
29.77	374.54	29.77	1663.59	29.77	165.887	29.77	929.99
29.78	-101.587	29.78	1534.24	29.78	886.516	29.78	1315.24
29.79	1894.52	29.79	2106.07	29.79	1674.73	29.79	215.472
29.8	1490.64	29.8	2501.23	29.8	1526.33	29.8	799.944
29.81	1182.92	29.81	1677.92	29.81	1544.07	29.81	1276.97
29.82	2096.4	29.82	2435.08	29.82	725.119	29.82	322.151
29.83	1822.07	29.83	2333.34	29.83	2142.59	29.83	-155.218
29.84	1342.07	29.84	1036.33	29.84	2323.69	29.84	-586.996
29.85	1122.36	29.85	2070.76	29.85	-261.211	29.85	1452.65
29.86	2907.72	29.86	984.543	29.86	2523.82	29.86	1746.66
29.87	2035.3	29.87	934.265	29.87	1726.19	29.87	673.187
29.88	1872.14	29.88	-445.612	29.88	1133.37	29.88	2958.15
29.89	1400.21	29.89	872.714	29.89	2152.08	29.89	1770.82
29.9	2114.3	29.9	2391.51	29.9	1689.69	29.9	240.836
29.91	1637.53	29.91	1056.75	29.91	2087.18	29.91	3565.42
29.92	940.321	29.92	215.338	29.92	778.692	29.92	1125.88
29.93	1018.92	29.93	-942.339	29.93	-296.332	29.93	453.916
29.94	1729.84	29.94	1728.11	29.94	561.752	29.94	793.987
29.95	1165.22	29.95	761.699	29.95	3201.59	29.95	3019.43
29.96	851.716	29.96	1115.87	29.96	1911.92	29.96	2064.06
29.97	2403.12	29.97	980.45	29.97	1300.13	29.97	2789.61
29.98	2088.73	29.98	1813.87	29.98	566.491	29.98	2516.53
29.99	521.344	29.99	641.825	29.99	1131.94	29.99	618.408
30	1475.57	30	1943.19	30	2820.29	30	3564.16
30.01	1815.29	30.01	1095.38	30.01	742.941	30.01	1709.22
30.02	2433.19	30.02	1392.71	30.02	1397.31	30.02	1373.61
30.03	2441.26	30.03	2386.81	30.03	2048.85	30.03	3356.59
30.04	1248.99	30.04	455.404	30.04	1573.04	30.04	777.744
30.05	1453.28	30.05	1343.39	30.05	1741.31	30.05	948.759
30.06	2226.36	30.06	1279.5	30.06	2471.94	30.06	1393.1
30.07	1482.13	30.07	529.303	30.07	682.24	30.07	835.654
30.08	981.705	30.08	2277.73	30.08	1591.9	30.08	2392.37
30.09	1224.3	30.09	3661.14	30.09	1832.71	30.09	2184.8
30.1	1397.43	30.1	2865.4	30.1	-190.399	30.1	1738.71
30.11	-598.293	30.11	1266.7	30.11	1362.52	30.11	2157.47
30.12	1305.32	30.12	1602.51	30.12	1715.46	30.12	1461.44
30.13	346.697	30.13	1889.95	30.13	1429.13	30.13	-43.5973
30.14	1225.15	30.14	464.791	30.14	1538.33	30.14	583.831
30.15	1957.18	30.15	870.399	30.15	389.69	30.15	1494.42
30.16	2175.2	30.16	1392.62	30.16	2196.76	30.16	1642.92
30.17	1612.75	30.17	1861.07	30.17	673.313	30.17	581.884
30.18	1835.22	30.18	1897.21	30.18	1845.22	30.18	497.815
30.19	1719.98	30.19	905.046	30.19	1917.75	30.19	1987.71
30.2	734.874	30.2	503.284	30.2	2403.82	30.2	1881.96
30.21	610.115	30.21	2025.8	30.21	2669.48	30.21	1730.7
30.22	1531.88	30.22	720.964	30.22	1708.53	30.22	-541.078
30.23	1476.49	30.23	2326.49	30.23	1225.88	30.23	1325.17
30.24	1896.58	30.24	1010.16	30.24	2645.95	30.24	1443.27
30.25	940.364	30.25	1671.77	30.25	1744.43	30.25	1738.08
30.26	1678.37	30.26	2011.58	30.26	968.925	30.26	945.628
30.27	1307.5	30.27	1199.71	30.27	1318.03	30.27	813.649
30.28	1475.96	30.28	1256.62	30.28	2394.46	30.28	1805.35
30.29	1876.25	30.29	1337.03	30.29	1373.25	30.29	2650.03
30.3	1552.82	30.3	432.271	30.3	1428.11	30.3	226.702
30.31	2130.25	30.31	1996.87	30.31	2304.42	30.31	2080.57
30.32	1910.93	30.32	3039.27	30.32	2323.21	30.32	1174.35
30.33	1479	30.33	1741.24	30.33	2079.26	30.33	1988.49
30.34	1923.7	30.34	2222.26	30.34	2270.16	30.34	1012.76
30.35	1130.43	30.35	1164.98	30.35	604.524	30.35	94.2933
30.36	2261.72	30.36	2762.29	30.36	651.957	30.36	1723.65
30.37	1594.61	30.37	2182.43	30.37	2210.45	30.37	310.498
30.38	1237.29	30.38	1161.26	30.38	1588.71	30.38	2640.99
30.39	1361.47	30.39	1610.15	30.39	1952.46	30.39	2876.12
30.4	1004.02	30.4	1621.47	30.4	3043.07	30.4	1455.47
30.41	1389.19	30.41	2122.35	30.41	1702.79	30.41	1581.8
30.42	-182.935	30.42	1924.61	30.42	2900.62	30.42	1726.52
30.43	1637.33	30.43	1468.16	30.43	2228.65	30.43	1627.42
30.44	2241.71	30.44	1442.23	30.44	1994.81	30.44	1722.38
30.45	1672.22	30.45	1790.36	30.45	1100.62	30.45	1158.87
30.46	1592.39	30.46	2586.05	30.46	1279.34	30.46	1528.01
30.47	1531.31	30.47	1390.22	30.47	1795.73	30.47	587.171
30.48	-289.554	30.48	1429.66	30.48	1228.23	30.48	971.279
30.49	1331.27	30.49	1365.99	30.49	1211.9	30.49	1995.11
30.5	1640.29	30.5	2357.14	30.5	3043.98	30.5	1434.61
30.51	2641.83	30.51	1594.15	30.51	2174.28	30.51	633.31
30.52	1593.02	30.52	1960.25	30.52	1996.39	30.52	717.47
30.53	1944.54	30.53	3721.24	30.53	1363.6	30.53	13.3103
30.54	2364.97	30.54	1851.43	30.54	1929.81	30.54	2013.15
30.55	1781.15	30.55	-427.51	30.55	2572.14	30.55	1815.27
30.56	1306.84	30.56	2061.61	30.56	1507.7	30.56	386.897
30.57	983.191	30.57	2062.59	30.57	1711.89	30.57	470.146
30.58	1138.21	30.58	1631.85	30.58	1786.56	30.58	1024.92
30.59	1063.35	30.59	2290.56	30.59	3386.47	30.59	2410.53
30.6	1312.86	30.6	2108.03	30.6	3208.91	30.6	1392.52
30.61	1307.45	30.61	790.472	30.61	2262.15	30.61	2099.38
30.62	1040.35	30.62	-907.882	30.62	733.749	30.62	3058.24
30.63	2642.33	30.63	2916.75	30.63	2306.72	30.63	-128.728
30.64	1198.59	30.64	928.217	30.64	2965.47	30.64	1736.16
30.65	1781.45	30.65	700.033	30.65	842.198	30.65	-171.162
30.66	1312.88	30.66	1627.21	30.66	1926.07	30.66	1587.51
30.67	2015.28	30.67	1573.09	30.67	1298.58	30.67	618.798
30.68	1680.99	30.68	2463.66	30.68	2665.72	30.68	865.094
30.69	2175.12	30.69	2379.3	30.69	1962.48	30.69	262.112
30.7	292.073	30.7	2863.94	30.7	1632.72	30.7	2170.29
30.71	-395.539	30.71	3318.34	30.71	2377.83	30.71	522.392
30.72	1788.57	30.72	2071.91	30.72	3483.68	30.72	930.022
30.73	1865.71	30.73	1801.2	30.73	1975.93	30.73	293.089
30.74	324.883	30.74	1616.89	30.74	2141.31	30.74	633.525
30.75	1280.14	30.75	2431.29	30.75	773.873	30.75	1667.92
30.76	1037.16	30.76	2102.07	30.76	1550.75	30.76	2622
30.77	1307.72	30.77	1289.37	30.77	1208.67	30.77	1084.41
30.78	2091.87	30.78	1205.87	30.78	2810.51	30.78	1106.04
30.79	1652.91	30.79	2970.82	30.79	3027.49	30.79	1559.57
30.8	2789.55	30.8	2034.64	30.8	1326.75	30.8	1034.32
30.81	2030.97	30.81	2399.92	30.81	1644.23	30.81	1183.38
30.82	1419.85	30.82	1975.16	30.82	1975.53	30.82	1428.95
30.83	1089.79	30.83	2438.13	30.83	1312.93	30.83	2110.06
30.84	884.57	30.84	1787.79	30.84	2025.31	30.84	2348.43
30.85	890.409	30.85	1145.49	30.85	3587.75	30.85	2162.98
30.86	1909.56	30.86	2486.25	30.86	2746.99	30.86	1602.98
30.87	2772.42	30.87	4208.98	30.87	1942.33	30.87	1838.75
30.88	1763.86	30.88	2287.56	30.88	1224.9	30.88	2758.73
30.89	1212.81	30.89	1108.52	30.89	1722.39	30.89	1336.77
30.9	1235.82	30.9	1220.58	30.9	2810.42	30.9	1709.43
30.91	2106.22	30.91	2860.25	30.91	2500.54	30.91	1728.43
30.92	3430.5	30.92	3494.95	30.92	2036.75	30.92	2355.48
30.93	2847.38	30.93	1411.32	30.93	2179.84	30.93	2164.76
30.94	2518.77	30.94	1205.48	30.94	1690.6	30.94	2797.95
30.95	2106.26	30.95	2454.88	30.95	2413.98	30.95	1245.19
30.96	2139.66	30.96	3486.15	30.96	2254.59	30.96	1885.7
30.97	3143.95	30.97	2350.2	30.97	2393.83	30.97	3197.06
30.98	2770.23	30.98	1772.68	30.98	2678.66	30.98	2793.46
30.99	2609.36	30.99	2688.99	30.99	2898.81	30.99	3147.36
31	2678.45	31	3449.93	31	3229.06	31	1729.72
31.01	2539.08	31.01	3005.13	31.01	2667.79	31.01	-167.199
31.02	3421.1	31.02	3230.7	31.02	3477.53	31.02	2878.18
31.03	4447.38	31.03	3349.65	31.03	3034.98	31.03	3100.36
31.04	3908.35	31.04	4764.14	31.04	2922.91	31.04	218.81
31.05	3258.09	31.05	4365.12	31.05	3512.54	31.05	1709.32
31.06	4620.93	31.06	3053.04	31.06	3204.89	31.06	1182.8
31.07	4457.68	31.07	3711.52	31.07	3987.2	31.07	3167.77
31.08	4861.31	31.08	3989.11	31.08	3082.62	31.08	3045.42
31.09	4251.23	31.09	3733.29	31.09	2142.57	31.09	3558.99
31.1	5180.08	31.1	5400.65	31.1	4861.3	31.1	3448.02
31.11	5431.33	31.11	4083.19	31.11	4656.06	31.11	3849.15
31.12	5043.48	31.12	3821.7	31.12	4710.71	31.12	2825.95
31.13	6019.27	31.13	6047.72	31.13	5066.87	31.13	3723.97
31.14	5693.56	31.14	6285.39	31.14	6644.69	31.14	3201.29
31.15	5631.34	31.15	6827.91	31.15	6718.34	31.15	4312.73
31.16	6736.51	31.16	7135.92	31.16	6081.65	31.16	4532.43
31.17	8292.28	31.17	7745.01	31.17	7101.97	31.17	5825.19
31.18	8734.17	31.18	8063.73	31.18	6959.4	31.18	5652.32
31.19	9477.92	31.19	10131.4	31.19	9335.97	31.19	7080.86
31.2	9373.77	31.2	10309.1	31.2	10516.9	31.2	7093.19
31.21	8744.46	31.21	10877	31.21	11029.4	31.21	6586.57
31.22	9934	31.22	11432.6	31.22	10972.7	31.22	10386.1
31.23	11113.6	31.23	11548.5	31.23	11320.8	31.23	10949.7
31.24	11677.6	31.24	13361.8	31.24	14588.7	31.24	12680.7
31.25	12475.8	31.25	13081.3	31.25	15198.5	31.25	14486.8
31.26	11994.8	31.26	13546.9	31.26	15973.4	31.26	17447.1
31.27	12495.9	31.27	14096.4	31.27	16976.3	31.27	20436.1
31.28	11862.8	31.28	12846.2	31.28	17547.4	31.28	20629.9
31.29	12232	31.29	14986.9	31.29	17337.6	31.29	21706.9
31.3	11803	31.3	15197.9	31.3	18814.2	31.3	21982.2
31.31	12025.8	31.31	13897.9	31.31	17338.3	31.31	23536.1
31.32	12547.8	31.32	12741.8	31.32	17249.7	31.32	23492
31.33	11590.5	31.33	11171.6	31.33	16758.8	31.33	21990.5
31.34	11598.3	31.34	13019.9	31.34	15675.1	31.34	21496.6
31.35	9730.31	31.35	11825.3	31.35	14206.6	31.35	19422
31.36	9853.56	31.36	9109.59	31.36	12814.7	31.36	19475.7
31.37	11629.8	31.37	8752.95	31.37	12434.1	31.37	18975.1
31.38	9104.02	31.38	8996.07	31.38	11702.2	31.38	16496.4
31.39	9780.11	31.39	8220.55	31.39	11524.9	31.39	15081.7
31.4	9444.32	31.4	8633.68	31.4	10716.2	31.4	13764.8
31.41	7871.54	31.41	7387.72	31.41	9293.66	31.41	11700.9
31.42	7119.78	31.42	5713.28	31.42	9070.66	31.42	12067.6
31.43	7904.05	31.43	6049.18	31.43	7705.11	31.43	9468.11
31.44	5922.87	31.44	5611.25	31.44	7025.85	31.44	7481.28
31.45	5602.33	31.45	5778.71	31.45	6657.24	31.45	8391.61
31.46	5178.45	31.46	4556.03	31.46	5347.34	31.46	5386.1
31.47	8505.23	31.47	5275.48	31.47	4694.98	31.47	4315.19
31.48	5791.72	31.48	1813.98	31.48	4033.04	31.48	4255.02
31.49	4800.01	31.49	1734.5	31.49	3180.36	31.49	2947.93
31.5	4552.36	31.5	3024.25	31.5	3022.18	31.5	2212.91
31.51	3557.66	31.51	2563.77	31.51	4397.42	31.51	2269.91
31.52	3514.46	31.52	3228.33	31.52	3376.86	31.52	1441.56
31.53	4261.68	31.53	3070.23	31.53	3075.66	31.53	3998.07
31.54	3484.28	31.54	1385.58	31.54	3136.79	31.54	1905.81
31.55	3817.69	31.55	-141.17	31.55	2869.26	31.55	2043.5
31.56	3301.24	31.56	1389.82	31.56	2005.64	31.56	2838.15
31.57	3177.1	31.57	1825.82	31.57	2754.12	31.57	2743.06
31.58	3812.06	31.58	1593.52	31.58	1818.03	31.58	3234.18
31.59	3224.36	31.59	648.012	31.59	1456.32	31.59	3656.71
31.6	4617.29	31.6	1475.58	31.6	525.285	31.6	1326.72
31.61	2551.94	31.61	1829.54	31.61	1064.34	31.61	1244.19
31.62	1971.42	31.62	1689.4	31.62	2585.36	31.62	1334.03
31.63	1849.51	31.63	1587.24	31.63	2529.45	31.63	126.137
31.64	2362.52	31.64	1221.82	31.64	1037.8	31.64	1559.78
31.65	3350.72	31.65	3868.89	31.65	1736.63	31.65	1823.54
31.66	2166.09	31.66	1636.75	31.66	1396.99	31.66	2315.89
31.67	2740.09	31.67	2622	31.67	-61.0755	31.67	418.147
31.68	1370.63	31.68	1664.67	31.68	1342.22	31.68	952.123
31.69	2068.08	31.69	2195.77	31.69	1263.17	31.69	1215.02
31.7	3125.88	31.7	1951.44	31.7	1851.94	31.7	2350.76
31.71	1615.15	31.71	1544.28	31.71	1801.6	31.71	663.835
31.72	1537.36	31.72	667.235	31.72	1762.31	31.72	-225.907
31.73	2193.91	31.73	1890.53	31.73	2839.12	31.73	382.021
31.74	1734.12	31.74	2267.8	31.74	2498.95	31.74	734.76
31.75	2532.85	31.75	1278.5	31.75	1187.3	31.75	1001.53
31.76	2199.35	31.76	510.746	31.76	794.957	31.76	2166.04
31.77	1626.54	31.77	3003.61	31.77	1059.75	31.77	808.887
31.78	1756.3	31.78	933.981	31.78	1595.2	31.78	858.507
31.79	1408.56	31.79	633.131	31.79	2132.84	31.79	669.384
31.8	323.408	31.8	2395.64	31.8	1936.93	31.8	2456.3
31.81	1764.59	31.81	1908.34	31.81	344.503	31.81	1434.31
31.82	2361.16	31.82	1052.49	31.82	1693.12	31.82	2335.6
31.83	1234.48	31.83	1345.64	31.83	1314.57	31.83	254.53
31.84	2252.63	31.84	2378.21	31.84	2301.83	31.84	586.62
31.85	347.78	31.85	1965.33	31.85	1989.43	31.85	-174.662
31.86	2518.4	31.86	692.823	31.86	1595.61	31.86	886.431
31.87	2515.91	31.87	720.648	31.87	22.9258	31.87	2447.93
31.88	2434.34	31.88	259.049	31.88	587.473	31.88	840.22
31.89	2673.07	31.89	1260.11	31.89	-223.774	31.89	1813.95
31.9	3559.58	31.9	2281.34	31.9	1725.9	31.9	1491.57
31.91	2645	31.91	1796.4	31.91	1923.18	31.91	1530.02
31.92	3044.78	31.92	1798.05	31.92	1226.42	31.92	806.998
31.93	2393.82	31.93	454.688	31.93	1348.33	31.93	1170.44
31.94	1393.58	31.94	1445.5	31.94	1583.7	31.94	3099.97
31.95	576.868	31.95	1200.22	31.95	4346.02	31.95	10.546
31.96	919.728	31.96	80.1795	31.96	1377.02	31.96	1977.69
31.97	1861.7	31.97	133.122	31.97	345.355	31.97	2211.35
31.98	2912.65	31.98	1177.33	31.98	-37.904	31.98	1861.66
31.99	1824.03	31.99	2607.13	31.99	922.382	31.99	951.262
32	2128.59	32	866.924	32	1396.93	32	1842.95
32.01	1642.93	32.01	871.254	32.01	-261.18	32.01	1600.19
32.02	1942.84	32.02	1379.38	32.02	1573.95	32.02	2224.19
32.03	1487.34	32.03	2535.55	32.03	1538.14	32.03	349.075
32.04	1882.66	32.04	1473.99	32.04	-189.686	32.04	1827.41
32.05	1242.16	32.05	964.118	32.05	1651.32	32.05	265.552
32.06	-557.216	32.06	1163.85	32.06	2012.03	32.06	1054.63
32.07	1142.41	32.07	1273.85	32.07	1837.41	32.07	1571.29
32.08	2795.9	32.08	334.32	32.08	-41.2629	32.08	993.983
32.09	1324.2	32.09	641.83	32.09	1137.13	32.09	1257.59
32.1	938.625	32.1	1783.74	32.1	1069.92	32.1	1494.09
32.11	1644.29	32.11	1378.17	32.11	1511.85	32.11	804.739
32.12	812.532	32.12	721.774	32.12	1112.71	32.12	1030.44
32.13	2465.45	32.13	1148.08	32.13	1050.8	32.13	1420.08
32.14	1881.8	32.14	1043.61	32.14	1342.45	32.14	1708.69
32.15	2121.36	32.15	747.132	32.15	649.832	32.15	1757.66
32.16	1577.08	32.16	1617.34	32.16	638.211	32.16	2540.62
32.17	2368.57	32.17	1322.51	32.17	790.287	32.17	1996.22
32.18	1534.38	32.18	1847.58	32.18	11.7422	32.18	1015.97
32.19	1359.28	32.19	1537.86	32.19	1806.57	32.19	1711.44
32.2	497.111	32.2	533.532	32.2	1726.79	32.2	254.797
32.21	2310.55	32.21	556.198	32.21	728.662	32.21	364.257
32.22	1125.74	32.22	768.522	32.22	227.636	32.22	3042.39
32.23	1510.63	32.23	804.186	32.23	1990.54	32.23	1849.35
32.24	1989.44	32.24	1771.52	32.24	1681.4	32.24	146.848
32.25	1901.91	32.25	2993.6	32.25	606.757	32.25	1474.69
32.26	2793.75	32.26	854.102	32.26	2535.42	32.26	1432.73
32.27	2878.11	32.27	1621.68	32.27	3014.88	32.27	677.102
32.28	2020.6	32.28	1123.98	32.28	1460.38	32.28	399.354
32.29	920.22	32.29	791.944	32.29	630.864	32.29	2195.85
32.3	2506.84	32.3	1641.02	32.3	1158.2	32.3	-357.553
32.31	2189.9	32.31	1121.39	32.31	1274.51	32.31	476.158
32.32	1263.29	32.32	1843.55	32.32	968.981	32.32	1629.59
32.33	2162.99	32.33	1306.2	32.33	962.581	32.33	1515.77
32.34	1872.15	32.34	1426.85	32.34	1557.93	32.34	1182.02
32.35	1055.11	32.35	1629.65	32.35	164.43	32.35	-169.435
32.36	2127.67	32.36	354.75	32.36	445.81	32.36	48.8662
32.37	1809.95	32.37	738.379	32.37	572.469	32.37	785.839
32.38	3530.94	32.38	828.018	32.38	331.33	32.38	948.938
32.39	2774.88	32.39	1872.58	32.39	499.565	32.39	1739.09
32.4	1994.12	32.4	1173.7	32.4	1020.82	32.4	-495.919
32.41	54.6928	32.41	1445.45	32.41	438.409	32.41	219.888
32.42	1983.6	32.42	1402.36	32.42	235.968	32.42	1884.99
32.43	2296.36	32.43	1897.81	32.43	1593.9	32.43	21.3728
32.44	3124.27	32.44	1467.29	32.44	970.99	32.44	1021.93
32.45	3825.17	32.45	612.751	32.45	494.502	32.45	2143.5
32.46	1495.82	32.46	483.675	32.46	2250.34	32.46	1433.81
32.47	1372.29	32.47	339.095	32.47	2117.52	32.47	-35.1312
32.48	796.799	32.48	1151.41	32.48	1311.73	32.48	206.62
32.49	624.522	32.49	1794.74	32.49	1453.35	32.49	-95.0206
32.5	1517.88	32.5	2553.13	32.5	2477.84	32.5	1783.22
32.51	2521.55	32.51	885.436	32.51	2086.39	32.51	103.365
32.52	1995.79	32.52	1277.28	32.52	1115.39	32.52	1058.73
32.53	2547.11	32.53	1754.1	32.53	273.477	32.53	753.209
32.54	1213.04	32.54	681.114	32.54	492.728	32.54	37.5706
32.55	1880.8	32.55	1506.4	32.55	421.83	32.55	1281.12
32.56	1247.73	32.56	715.248	32.56	1445.56	32.56	2682.59
32.57	1516.22	32.57	77.1325	32.57	502.428	32.57	1321.07
32.58	1896.65	32.58	668.278	32.58	1054.39	32.58	429.758
32.59	2078.84	32.59	1245.99	32.59	1838.77	32.59	-1009.33
32.6	2336.76	32.6	481.543	32.6	2001.65	32.6	1300.93
32.61	1683.34	32.61	1876.38	32.61	1520.16	32.61	1412.67
32.62	-222.422	32.62	2880.44	32.62	1218.51	32.62	1970.96
32.63	3321.37	32.63	1812.27	32.63	3810.35	32.63	75.3896
32.64	1739.14	32.64	761.354	32.64	2595.08	32.64	1259.63
32.65	1060.28	32.65	521.468	32.65	1183.93	32.65	1345.27
32.66	1050.37	32.66	975.456	32.66	1671.18	32.66	1826.39
32.67	696.422	32.67	1558.04	32.67	3468.68	32.67	679.914
32.68	1922.25	32.68	1924.28	32.68	572.344	32.68	2675.83
32.69	1662.58	32.69	1830.3	32.69	2676.75	32.69	1593.23
32.7	866.576	32.7	1320.33	32.7	2347.96	32.7	1335.94
32.71	2372.28	32.71	2226.03	32.71	3892.98	32.71	2851.58
32.72	1906.71	32.72	397.103	32.72	658.492	32.72	1298.79
32.73	2857.59	32.73	754.756	32.73	1239.51	32.73	1708.76
32.74	1292.51	32.74	-400.647	32.74	1196.3	32.74	3100.61
32.75	919.249	32.75	1377.86	32.75	1628.73	32.75	1726.9
32.76	2443	32.76	-230.934	32.76	3164.98	32.76	2431.85
32.77	2082.52	32.77	1393.02	32.77	2184.82	32.77	860.377
32.78	2368.8	32.78	913.78	32.78	1630.36	32.78	1594.93
32.79	1739.09	32.79	312.178	32.79	3304.97	32.79	561.184
32.8	635.629	32.8	1998.44	32.8	2650.33	32.8	1940.21
32.81	443.187	32.81	1190.77	32.81	1990.42	32.81	412.089
32.82	1035.64	32.82	1261.28	32.82	865.022	32.82	1697.14
32.83	1454.55	32.83	668.327	32.83	2768.18	32.83	1710.2
32.84	1212.31	32.84	222.172	32.84	1620.12	32.84	2872.54
32.85	3456.02	32.85	1986.53	32.85	1071.69	32.85	1937.02
32.86	2216.57	32.86	260.606	32.86	698.686	32.86	919.381
32.87	3170.03	32.87	956.201	32.87	1946.81	32.87	-264.786
32.88	2773.7	32.88	956.491	32.88	1700.07	32.88	-341.459
32.89	3378.21	32.89	562.673	32.89	406.954	32.89	669.517
32.9	1998.72	32.9	1675.95	32.9	2024.07	32.9	565.832
32.91	2422.23	32.91	-320.927	32.91	1160.85	32.91	2374.95
32.92	-556.117	32.92	159.382	32.92	1388.8	32.92	2528.14
32.93	2725.36	32.93	3143.25	32.93	2220.51	32.93	2384.27
32.94	2038.64	32.94	1905.16	32.94	1208.95	32.94	2286.27
32.95	1667.17	32.95	2859.1	32.95	1595.04	32.95	-308.23
32.96	754.515	32.96	1044.62	32.96	2545.35	32.96	634.146
32.97	2026.3	32.97	1826.88	32.97	661.792	32.97	2031.5
32.98	992.14	32.98	1093.27	32.98	2490.24	32.98	1287.1
32.99	1828.31	32.99	2138.99	32.99	3071.07	32.99	2347.19
33	2119.28	33	3199.88	33	1024.87	33	1875.14
33.01	2450.84	33.01	206.381	33.01	1029.25	33.01	1457.52
33.02	2554.74	33.02	233.946	33.02	2259	33.02	1655.91
33.03	3213.86	33.03	505.681	33.03	1426.68	33.03	1721.33
33.04	1482.09	33.04	1780.76	33.04	1525.4	33.04	1761.39
33.05	2940.35	33.05	1643.26	33.05	1662.59	33.05	1063.2
33.06	1885.2	33.06	-403.346	33.06	1657.42	33.06	1062.69
33.07	953.791	33.07	707.24	33.07	368.547	33.07	21.9456
33.08	2022.1	33.08	1040	33.08	2310.58	33.08	2407.57
33.09	2253.79	33.09	72.2366	33.09	2259.11	33.09	1584.61
33.1	2219.56	33.1	1791.67	33.1	351.681	33.1	1811.46
33.11	1444.53	33.11	1312.95	33.11	2500.83	33.11	1514.08
33.12	1221.01	33.12	1553.45	33.12	1146.73	33.12	2532.88
33.13	1799.2	33.13	2391.21	33.13	-367.893	33.13	2686.95
33.14	1506.93	33.14	-71.126	33.14	1912.38	33.14	2156.59
33.15	2801.32	33.15	4.61305	33.15	2625.63	33.15	1717.06
33.16	1624.46	33.16	932.185	33.16	3281.7	33.16	1391.65
33.17	535.37	33.17	1078.36	33.17	751.915	33.17	1227.31
33.18	1980.02	33.18	2282.32	33.18	2497.81	33.18	1865.9
33.19	1741.69	33.19	1116.27	33.19	1572.71	33.19	424.589
33.2	1636.61	33.2	1333.7	33.2	2407.63	33.2	1011.56
33.21	2211.42	33.21	614.847	33.21	2372.85	33.21	913.69
33.22	2721.36	33.22	1305.63	33.22	1168.63	33.22	473.078
33.23	1099.79	33.23	1412.16	33.23	1634.64	33.23	599.55
33.24	1051.64	33.24	1063.72	33.24	2778.32	33.24	265.826
33.25	868.23	33.25	902.032	33.25	824.339	33.25	596.36
33.26	1780.96	33.26	1521.56	33.26	1315.04	33.26	357.2
33.27	1698.83	33.27	2208.46	33.27	804.004	33.27	-136.59
33.28	1763.43	33.28	353.588	33.28	2046.59	33.28	1097.14
33.29	12.2894	33.29	938.913	33.29	2884.35	33.29	987.688
33.3	1092.1	33.3	2244.6	33.3	2535.54	33.3	715.37
33.31	813.571	33.31	1379.53	33.31	2484.18	33.31	1541.32
33.32	2950.17	33.32	1008.64	33.32	327.143	33.32	1246.48
33.33	2029.05	33.33	2584.87	33.33	1644.53	33.33	1681.27
33.34	1196.18	33.34	1828.98	33.34	2304	33.34	1037.93
33.35	2447.41	33.35	1355.82	33.35	2384.7	33.35	607.33
33.36	2377.88	33.36	1455.15	33.36	1870.75	33.36	793.749
33.37	1408.72	33.37	1466.29	33.37	1906.73	33.37	1439.76
33.38	1793.47	33.38	634.987	33.38	1059.94	33.38	-254.591
33.39	1895.78	33.39	2131.52	33.39	1784.06	33.39	2226.63
33.4	1700.98	33.4	1773.72	33.4	1633.91	33.4	1626.94
33.41	924.336	33.41	2801.9	33.41	1526.29	33.41	1229.05
33.42	1258.74	33.42	564.561	33.42	722.532	33.42	904.674
33.43	1655.51	33.43	1932.06	33.43	991.123	33.43	2237.45
33.44	1654.18	33.44	1512.24	33.44	790.658	33.44	2100.53
33.45	1671.9	33.45	1135.38	33.45	1284.06	33.45	2283.2
33.46	2548.72	33.46	1593.48	33.46	1982.6	33.46	1921.33
33.47	2088.34	33.47	1829.95	33.47	1947.63	33.47	2766.91
33.48	1423.18	33.48	2468.66	33.48	2825.28	33.48	1593.78
33.49	1275.77	33.49	1612.74	33.49	3086.91	33.49	1020.85
33.5	1945.66	33.5	2216.94	33.5	1710.44	33.5	2026.61
33.51	830.843	33.51	91.8657	33.51	1753.68	33.51	1105.79
33.52	2490.72	33.52	471.667	33.52	1061.81	33.52	890.969
33.53	646.138	33.53	898.099	33.53	866.984	33.53	2606.05
33.54	1776.8	33.54	1618.35	33.54	1813.68	33.54	1845.39
33.55	231.911	33.55	1715.94	33.55	2503.68	33.55	1886.38
33.56	1577.9	33.56	2153.24	33.56	1482.06	33.56	2645.07
33.57	1374.91	33.57	428.106	33.57	332.363	33.57	1526.8
33.58	2848.11	33.58	802.53	33.58	2135.06	33.58	4425.7
33.59	2279.3	33.59	1948.8	33.59	1868.84	33.59	1360.44
33.6	2431.15	33.6	1159.74	33.6	1927.24	33.6	1671.92
33.61	987.239	33.61	192.338	33.61	1526.81	33.61	1613.39
33.62	1267.9	33.62	533.643	33.62	1112.2	33.62	2202.59
33.63	1947.98	33.63	591.397	33.63	681.752	33.63	2077.38
33.64	2658.85	33.64	564.792	33.64	1294.76	33.64	1053.64
33.65	2911.45	33.65	1121.5	33.65	177.797	33.65	546.461
33.66	1382.39	33.66	1899.11	33.66	1370.57	33.66	1294.57
33.67	1951.58	33.67	1947.51	33.67	1307.48	33.67	2010.88
33.68	1579.99	33.68	871.198	33.68	1053.35	33.68	1115.32
33.69	1359.87	33.69	632.608	33.69	1118.93	33.69	36.3143
33.7	1044.23	33.7	1775.69	33.7	1327.82	33.7	1192.57
33.71	1086.65	33.71	1496.15	33.71	2235.58	33.71	1667.22
33.72	2502.63	33.72	2207.64	33.72	2200.89	33.72	1919.9
33.73	1980.7	33.73	1552.03	33.73	604.837	33.73	1354.31
33.74	1381.71	33.74	1694.41	33.74	185.27	33.74	689.391
33.75	1438.99	33.75	475.629	33.75	1128.98	33.75	761.638
33.76	3800.47	33.76	339.672	33.76	1897.18	33.76	2405.79
33.77	2601.83	33.77	1414.84	33.77	1030.93	33.77	19.3212
33.78	920.366	33.78	2712.73	33.78	1956.32	33.78	1461.91
33.79	1694.47	33.79	1593.32	33.79	2777.81	33.79	974.245
33.8	475.101	33.8	1815.74	33.8	777.924	33.8	2675.67
33.81	1041.51	33.81	882.966	33.81	827.032	33.81	1672.13
33.82	1070.53	33.82	500.238	33.82	22.3808	33.82	1700.68
33.83	656.424	33.83	1462.93	33.83	958.211	33.83	3602.57
33.84	1236.52	33.84	1248.62	33.84	910.07	33.84	928.298
33.85	623.581	33.85	550.108	33.85	1571.23	33.85	543.24
33.86	965.42	33.86	2515.18	33.86	789.283	33.86	1196.7
33.87	438.651	33.87	2221.61	33.87	54.7418	33.87	1099.33
33.88	893.234	33.88	905.069	33.88	1758.82	33.88	2081.4
33.89	997.716	33.89	809.909	33.89	1652.52	33.89	1809.1
33.9	1673.68	33.9	793.161	33.9	850.836	33.9	667.39
33.91	1526.74	33.91	2812.96	33.91	1133.06	33.91	545.926
33.92	1670.9	33.92	1508.14	33.92	2764.55	33.92	1238.9
33.93	1403.47	33.93	852.907	33.93	1486.3	33.93	1516.99
33.94	1654.51	33.94	1714.03	33.94	1966.51	33.94	582.973
33.95	1779.2	33.95	1514.72	33.95	1653.26	33.95	2485.26
33.96	974.856	33.96	1736.85	33.96	1013.41	33.96	1403.06
33.97	60.4092	33.97	838.487	33.97	279.487	33.97	1679.56
33.98	1198.29	33.98	706.56	33.98	829.49	33.98	917.038
33.99	3370.59	33.99	-452.767	33.99	1013.59	33.99	901.557
34	1465.58	34	2048.47	34	2500.95	34	283.823
34.01	387.962	34.01	1903.98	34.01	2149.56	34.01	-457.244
34.02	1097.18	34.02	953.125	34.02	1338.5	34.02	1062.04
34.03	1996.35	34.03	619.278	34.03	1094.43	34.03	1473.66
34.04	518.334	34.04	513.148	34.04	1183.92	34.04	2265.84
34.05	287.884	34.05	2156	34.05	135.587	34.05	2455.32
34.06	261.289	34.06	1625.88	34.06	-746.447	34.06	2456.28
34.07	2400.59	34.07	1624.35	34.07	384.142	34.07	2421.16
34.08	1658.98	34.08	1405.87	34.08	1188.09	34.08	610.066
34.09	2585.16	34.09	1403.53	34.09	956.433	34.09	1335.58
34.1	1777.97	34.1	1873.01	34.1	2675.5	34.1	2314.36
34.11	877.5	34.11	505.541	34.11	1054.37	34.11	2058.89
34.12	1196.02	34.12	228.675	34.12	1013.52	34.12	1817.46
34.13	3304.65	34.13	313.89	34.13	1344.35	34.13	2144.4
34.14	1343.58	34.14	176.921	34.14	1746.31	34.14	1317.73
34.15	2268.65	34.15	923.952	34.15	2689.83	34.15	1274.29
34.16	2667.9	34.16	30.2153	34.16	920.639	34.16	1079.62
34.17	251.991	34.17	1156.51	34.17	-106.871	34.17	1038.84
34.18	1153.05	34.18	657.865	34.18	72.1951	34.18	1142.08
34.19	2233.27	34.19	755.231	34.19	-126.412	34.19	3770.91
34.2	2045.86	34.2	1606.11	34.2	-909.559	34.2	1823.85
34.21	1709.49	34.21	809.392	34.21	1228.16	34.21	875.264
34.22	1882.83	34.22	2306.69	34.22	2158.5	34.22	1438.36
34.23	833.38	34.23	1611.6	34.23	2530.21	34.23	1652.38
34.24	2552.05	34.24	1677.64	34.24	3101.28	34.24	1397.41
34.25	1738.12	34.25	561.54	34.25	1562.85	34.25	684.622
34.26	2049.28	34.26	941.576	34.26	1280.22	34.26	842.383
34.27	1612.73	34.27	1584.31	34.27	1155.3	34.27	929.318
34.28	1045.24	34.28	1503.66	34.28	630.753	34.28	1828.6
34.29	2056.38	34.29	-318.486	34.29	769.08	34.29	1658.58
34.3	1831.65	34.3	262.943	34.3	1599.26	34.3	1653.12
34.31	445.481	34.31	1111.81	34.31	1501.19	34.31	1977.2
34.32	2371.98	34.32	1029.1	34.32	613.771	34.32	50.2847
34.33	1115.5	34.33	1349.34	34.33	815.261	34.33	767.193
34.34	675.711	34.34	1605.1	34.34	1249.96	34.34	1747.94
34.35	631.755	34.35	1885.89	34.35	1321.68	34.35	1624.17
34.36	619.267	34.36	1157.98	34.36	1209.26	34.36	3322.7
34.37	1925.97	34.37	1787.35	34.37	523.53	34.37	2315.63
34.38	2414.37	34.38	1191.8	34.38	1648.58	34.38	2054.36
34.39	642.8	34.39	2935.56	34.39	2886.31	34.39	361.357
34.4	1311.31	34.4	1117.55	34.4	672.042	34.4	1784.04
34.41	1638.91	34.41	1800.49	34.41	-81.2943	34.41	989.985
34.42	1455.11	34.42	192.992	34.42	1044.46	34.42	1175.65
34.43	2114.95	34.43	1646.6	34.43	721.505	34.43	2402.28
34.44	1792.81	34.44	920.056	34.44	-147.281	34.44	1120.66
34.45	1311.93	34.45	-739.925	34.45	937.612	34.45	1757.44
34.46	1782.41	34.46	404.629	34.46	2181.1	34.46	1428.07
34.47	1210.71	34.47	3063.26	34.47	985.297	34.47	2253.09
34.48	866.968	34.48	1351.06	34.48	2030.85	34.48	3163.82
34.49	1135.95	34.49	2093.39	34.49	1381.01	34.49	1819.47
34.5	1195.66	34.5	1559.71	34.5	471.28	34.5	1048.78
34.51	1850.26	34.51	1499.8	34.51	857.335	34.51	1810.76
34.52	1314.95	34.52	1631.74	34.52	1202.13	34.52	1383.94
34.53	1468.54	34.53	2596.31	34.53	2147.55	34.53	1184.92
34.54	2015.26	34.54	2038.67	34.54	2111.91	34.54	1470.85
34.55	1011.42	34.55	1980.53	34.55	698.754	34.55	564.325
34.56	1395.26	34.56	751.709	34.56	1630.73	34.56	1646.28
34.57	2352.41	34.57	2327.95	34.57	1900.42	34.57	1653.21
34.58	1490.29	34.58	1540.82	34.58	774.217	34.58	833.05
34.59	118.897	34.59	2215.62	34.59	619.903	34.59	1595.87
34.6	569.31	34.6	1393.31	34.6	1602.77	34.6	2588.88
34.61	1182.17	34.61	1165.84	34.61	427.82	34.61	2539.95
34.62	422.414	34.62	982.894	34.62	1118.73	34.62	1376.58
34.63	2078.06	34.63	1996.99	34.63	874.262	34.63	2203.11
34.64	1543.3	34.64	1602.85	34.64	1573.62	34.64	1534.06
34.65	1535.98	34.65	2207.88	34.65	692	34.65	209.612
34.66	1646.16	34.66	1852.98	34.66	1789.96	34.66	1479.88
34.67	1394.08	34.67	2807.93	34.67	1355.96	34.67	733.272
34.68	1007.85	34.68	864.071	34.68	1031.2	34.68	1452.41
34.69	1255.57	34.69	2191.45	34.69	1609.76	34.69	1881.85
34.7	1430.15	34.7	962.385	34.7	1556.95	34.7	1626.42
34.71	-49.0045	34.71	936.075	34.71	1526.63	34.71	1342.63
34.72	2115.11	34.72	646.796	34.72	651.56	34.72	1341.93
34.73	1739.17	34.73	917.296	34.73	-81.8087	34.73	2318.22
34.74	402.794	34.74	1091.91	34.74	2006.29	34.74	2547.81
34.75	3180.17	34.75	1400.37	34.75	1227.18	34.75	1014.59
34.76	1779.18	34.76	369.15	34.76	126.15	34.76	1016.48
34.77	2158.81	34.77	625.486	34.77	1076	34.77	1522.22
34.78	988.458	34.78	1400.08	34.78	163.198	34.78	2470.58
34.79	1009.01	34.79	1631.8	34.79	1783.71	34.79	-223.575
34.8	3156.75	34.8	1637.24	34.8	711.717	34.8	1843.63
34.81	1484.29	34.81	1175.01	34.81	219.493	34.81	1357.6
34.82	1084.28	34.82	1641.87	34.82	357.869	34.82	1645.22
34.83	1244.89	34.83	1713.99	34.83	625.441	34.83	2483.88
34.84	2665.23	34.84	540.928	34.84	2621.81	34.84	2765.1
34.85	1577.63	34.85	379.068	34.85	952.866	34.85	2327.98
34.86	1003.15	34.86	-461.302	34.86	1044.91	34.86	2569.06
34.87	901.652	34.87	980.572	34.87	-148.794	34.87	165.094
34.88	1120.67	34.88	419.981	34.88	1158.91	34.88	1163.72
34.89	559.392	34.89	1053.84	34.89	1300.01	34.89	1047.89
34.9	994.499	34.9	-50.0478	34.9	2816.4	34.9	66.4093
34.91	703.821	34.91	1996.68	34.91	684.047	34.91	1184.09
34.92	1304.25	34.92	277.501	34.92	2037.25	34.92	1802.89
34.93	1187.45	34.93	2753.22	34.93	812.696	34.93	355.101
34.94	833.217	34.94	2711.15	34.94	786.801	34.94	1175.86
34.95	1213.85	34.95	3433.03	34.95	2206.83	34.95	1778.69
34.96	965.829	34.96	3277.41	34.96	1335.31	34.96	1345.3
34.97	1644.86	34.97	2491.54	34.97	1166.71	34.97	1614.49
[truncated: 4,803 more rows]

## Sheet: FIGURE 3(c)
FIGURE 3(c)
2 Theta (degree)	Intensity (a.u.)	2 Theta (degree)	Intensity (a.u.)	2 Theta (degree)	Intensity (a.u.)	2 Theta (degree)	Intensity (a.u.)
15	1646.83	15	48.9978	15	977.69	15	464.008
15.01	434.287	15.01	-400.452	15.01	1282.6	15.01	2045.81
15.02	1587.93	15.02	619.425	15.02	572.89	15.02	-213.561
15.03	385.648	15.03	-378.631	15.03	320.661	15.03	1813.39
15.04	271.139	15.04	1025.8	15.04	904.002	15.04	1288.52
15.05	1103.95	15.05	423.3	15.05	83.5186	15.05	2064.76
15.06	1891.53	15.06	301.322	15.06	-226.605	15.06	489.258
15.07	1990.26	15.07	993.737	15.07	230.914	15.07	1491.07
15.08	1390.76	15.08	2177.4	15.08	135.222	15.08	1426.29
15.09	1602.3	15.09	-67.2251	15.09	114.907	15.09	2173.67
15.1	872.19	15.1	-10.2652	15.1	735.454	15.1	1434.14
15.11	1199.58	15.11	-791.638	15.11	1220.21	15.11	1220.78
15.12	1224.09	15.12	247.177	15.12	206.38	15.12	1836.47
15.13	2464.85	15.13	599.544	15.13	607.245	15.13	1578.44
15.14	2103.06	15.14	1450.98	15.14	588.176	15.14	2151.38
15.15	972.805	15.15	1161.6	15.15	436.742	15.15	1801.41
15.16	2342.89	15.16	62.1369	15.16	172.526	15.16	1120.67
15.17	1830.48	15.17	702.115	15.17	-67.7459	15.17	2107.54
15.18	1637.82	15.18	612.613	15.18	945.338	15.18	1190.55
15.19	1624.83	15.19	646.516	15.19	-175.248	15.19	463.976
15.2	2359.52	15.2	-163.441	15.2	476.573	15.2	1809.73
15.21	2439.75	15.21	728.858	15.21	267.836	15.21	2093.15
15.22	2209.78	15.22	1150.61	15.22	922.059	15.22	1412.66
15.23	2310.62	15.23	-280.552	15.23	463.441	15.23	1566.8
15.24	654.745	15.24	-318.689	15.24	651.896	15.24	1648.21
15.25	1688.53	15.25	-1001.55	15.25	1273.19	15.25	2133.49
15.26	2539.84	15.26	147.708	15.26	1143.26	15.26	747.501
15.27	2412.86	15.27	742.35	15.27	1066.58	15.27	1978.61
15.28	1819.78	15.28	1834.26	15.28	834.649	15.28	1374.69
15.29	1630.68	15.29	730.678	15.29	641.74	15.29	1213.28
15.3	1765.74	15.3	1117.3	15.3	584.211	15.3	808.083
15.31	2145.41	15.31	650.64	15.31	1389.36	15.31	2017.49
15.32	1772.49	15.32	6.42824	15.32	1442.79	15.32	618.825
15.33	2055.4	15.33	931.152	15.33	845.933	15.33	1854.37
15.34	420.844	15.34	830.196	15.34	245.144	15.34	1276.63
15.35	209.598	15.35	1313.14	15.35	-615.838	15.35	1543.57
15.36	457.006	15.36	1047.56	15.36	248.646	15.36	256.428
15.37	1551	15.37	849.458	15.37	-9.09215	15.37	769.58
15.38	1137.53	15.38	450.888	15.38	357.027	15.38	1269.15
15.39	1459.34	15.39	1269.62	15.39	960.769	15.39	658.86
15.4	1767.42	15.4	1798.92	15.4	1179.76	15.4	530.932
15.41	968.022	15.41	1232.43	15.41	612.845	15.41	2110.39
15.42	917.413	15.42	447.357	15.42	754.78	15.42	2230.76
15.43	1546.08	15.43	332.651	15.43	-92.8388	15.43	1459.99
15.44	2521.02	15.44	1439.39	15.44	631.956	15.44	2360.41
15.45	2220.85	15.45	-63.5264	15.45	-331.952	15.45	2189.38
15.46	2640.77	15.46	234.843	15.46	707.774	15.46	2987.57
15.47	824.05	15.47	475.521	15.47	488.024	15.47	1881.76
15.48	1171.28	15.48	-163.278	15.48	1352.74	15.48	1570.13
15.49	2092.81	15.49	1059.69	15.49	886.082	15.49	2620.29
15.5	880.049	15.5	1160.33	15.5	492.08	15.5	2901.19
15.51	1259.98	15.51	-290.096	15.51	729.983	15.51	2030.2
15.52	1179.48	15.52	-106.176	15.52	406.55	15.52	2505.65
15.53	925.833	15.53	1082.64	15.53	1672.75	15.53	1386.09
15.54	338.936	15.54	294.202	15.54	646.837	15.54	1257.64
15.55	1525	15.55	854.45	15.55	735.388	15.55	1793.84
15.56	1592.08	15.56	238.871	15.56	1544.89	15.56	1849.78
15.57	1180.2	15.57	322.654	15.57	1006.89	15.57	2671.44
15.58	1605.83	15.58	57.925	15.58	496.061	15.58	932.015
15.59	935.908	15.59	730.032	15.59	1182.86	15.59	1885.56
15.6	2075.24	15.6	978.492	15.6	542.09	15.6	1277.7
15.61	1069.76	15.61	1418.26	15.61	500.719	15.61	1982.18
15.62	1022.69	15.62	-171.806	15.62	106.603	15.62	2203.28
15.63	1745.12	15.63	1358.42	15.63	172.181	15.63	357.08
15.64	1340.37	15.64	772.791	15.64	1005.93	15.64	1739.03
15.65	0.47465	15.65	1159.78	15.65	1396.7	15.65	1729.89
15.66	1701.65	15.66	898.723	15.66	617.851	15.66	-99.0938
15.67	1331.32	15.67	326.783	15.67	608.822	15.67	1066.46
15.68	2079.94	15.68	-271.475	15.68	-300.999	15.68	2110.9
15.69	1322.12	15.69	1220.47	15.69	1046.17	15.69	1631.88
15.7	2562.5	15.7	2097.62	15.7	1944.01	15.7	1981.67
15.71	1365.26	15.71	835.047	15.71	1487.82	15.71	858.501
15.72	551.06	15.72	-508.126	15.72	1319.89	15.72	543.746
15.73	1745.48	15.73	170.911	15.73	1287.71	15.73	2437.78
15.74	729.211	15.74	1280.46	15.74	269.857	15.74	2347.4
15.75	1036.63	15.75	1479.32	15.75	532.031	15.75	1086.06
15.76	1802.3	15.76	1473.06	15.76	233.75	15.76	769.035
15.77	1189.29	15.77	380.349	15.77	369.168	15.77	992.582
15.78	1684.34	15.78	612.196	15.78	881.708	15.78	634.725
15.79	1032.74	15.79	349.012	15.79	-285.784	15.79	2063.16
15.8	2099.88	15.8	1348.12	15.8	-77.7953	15.8	3058.63
15.81	1527.12	15.81	-228.734	15.81	285.181	15.81	1511.28
15.82	413.061	15.82	92.7998	15.82	640.209	15.82	1477.47
15.83	1148.07	15.83	113.718	15.83	606.558	15.83	1239.86
15.84	561.821	15.84	38.7415	15.84	592.787	15.84	609.033
15.85	1998.96	15.85	-240.307	15.85	785.34	15.85	1784.81
15.86	1395.68	15.86	440.08	15.86	789.448	15.86	1706.74
15.87	1363.75	15.87	1064.22	15.87	47.2363	15.87	2246.15
15.88	819.402	15.88	67.1061	15.88	201.307	15.88	775.696
15.89	2576.98	15.89	543.461	15.89	1199.34	15.89	1499.02
15.9	1816.2	15.9	1273.51	15.9	962.33	15.9	2422.7
15.91	2372.28	15.91	-368.843	15.91	433.344	15.91	193.463
15.92	2238.05	15.92	1381.91	15.92	1233.12	15.92	1694.98
15.93	882.104	15.93	543.124	15.93	866.363	15.93	3356.63
15.94	1387.11	15.94	963.844	15.94	791.557	15.94	3887.68
15.95	2003.26	15.95	-392.103	15.95	578.568	15.95	2272.35
15.96	1416.89	15.96	445.293	15.96	-330.875	15.96	1801.94
15.97	697.432	15.97	574.08	15.97	-434.244	15.97	635.356
15.98	2367.35	15.98	1773.81	15.98	792.813	15.98	2816.03
15.99	1456.31	15.99	1184.25	15.99	1233.1	15.99	1618.68
16	2062.57	16	-60.1865	16	-7.45436	16	1939.09
16.01	1450.77	16.01	-185.72	16.01	600.68	16.01	1933
16.02	747.399	16.02	-589.085	16.02	-5.80917	16.02	925.402
16.03	387.842	16.03	419.402	16.03	386.958	16.03	1348.1
16.04	1544.16	16.04	-60.7152	16.04	325.724	16.04	2117.03
16.05	810.885	16.05	935.545	16.05	1437.85	16.05	793.427
16.06	839.489	16.06	960.161	16.06	607.986	16.06	661.277
16.07	985.29	16.07	-58.4677	16.07	487.431	16.07	2070.35
16.08	150.312	16.08	895.797	16.08	1700.67	16.08	2563.58
16.09	887.946	16.09	-505.576	16.09	292.738	16.09	1742.72
16.1	2360.55	16.1	-1081.44	16.1	-425.481	16.1	116.374
16.11	1048.81	16.11	-821.913	16.11	640.358	16.11	2097.51
16.12	1231.5	16.12	844.904	16.12	142.448	16.12	1167.45
16.13	3234.2	16.13	1379.86	16.13	557.652	16.13	276.671
16.14	1613.16	16.14	-1260.07	16.14	682.074	16.14	2142.26
16.15	1285.47	16.15	-154.444	16.15	1459.91	16.15	3638.7
16.16	1258.06	16.16	1253.09	16.16	103.423	16.16	2581.22
16.17	1831.26	16.17	818.5	16.17	818.68	16.17	2137.11
16.18	751.103	16.18	190.154	16.18	336.228	16.18	2390.53
16.19	1839.12	16.19	446.317	16.19	555.444	16.19	2531.07
16.2	2132.39	16.2	49.1557	16.2	1162.03	16.2	2304.02
16.21	2581.58	16.21	817.926	16.21	1296.95	16.21	2131.97
16.22	1994.8	16.22	639.603	16.22	463.238	16.22	3252.76
16.23	1032.07	16.23	837.8	16.23	800.644	16.23	1742.75
16.24	1582.31	16.24	802.829	16.24	475.962	16.24	3029
16.25	3022.87	16.25	692.361	16.25	1390.46	16.25	2156.96
16.26	1268.31	16.26	498.787	16.26	8.59078	16.26	376.914
16.27	1847.2	16.27	1268.97	16.27	227.735	16.27	1905.87
16.28	1820.07	16.28	1760.35	16.28	476.413	16.28	850.8
16.29	1316.01	16.29	1136.88	16.29	-241.377	16.29	2813.56
16.3	121.166	16.3	518.428	16.3	-188.233	16.3	3273.5
16.31	2110.36	16.31	1184.85	16.31	788.309	16.31	3104.1
16.32	1604.21	16.32	443.221	16.32	859.261	16.32	1689.35
16.33	1879.53	16.33	1430.58	16.33	1054.81	16.33	699.254
16.34	819.678	16.34	1072.8	16.34	836.58	16.34	1851.44
16.35	1663.43	16.35	912.499	16.35	807.426	16.35	1496.46
16.36	2261.88	16.36	-2.65319	16.36	880.429	16.36	1731.14
16.37	1808.06	16.37	781.488	16.37	413.721	16.37	1272.5
16.38	2036.44	16.38	1080.69	16.38	785.202	16.38	1918.29
16.39	1512.66	16.39	199.933	16.39	909.62	16.39	2055.75
16.4	1059.16	16.4	424.126	16.4	165.111	16.4	1619.81
16.41	259.49	16.41	1392.74	16.41	1057.96	16.41	1864.7
16.42	-74.0403	16.42	298.284	16.42	150.283	16.42	69.8327
16.43	388.679	16.43	-429.971	16.43	889.225	16.43	3090.07
16.44	891.48	16.44	834.102	16.44	962.015	16.44	2625.29
16.45	1700.04	16.45	494.698	16.45	981.707	16.45	3017.36
16.46	1693.39	16.46	809.868	16.46	-629.029	16.46	2056.07
16.47	799.102	16.47	168.098	16.47	-277.383	16.47	858.665
16.48	2500.18	16.48	-168.354	16.48	670.642	16.48	1613.68
16.49	680.202	16.49	1123.1	16.49	933.691	16.49	1826.31
16.5	2601.95	16.5	677.796	16.5	463.419	16.5	1426.12
16.51	2239.27	16.51	38.6463	16.51	427.883	16.51	2205.91
16.52	1613.31	16.52	-194.081	16.52	634.289	16.52	1343.1
16.53	915.908	16.53	790.799	16.53	-870.356	16.53	1948.75
16.54	1786.69	16.54	704.885	16.54	1088.93	16.54	1760.13
16.55	1574.66	16.55	555.748	16.55	799.302	16.55	2197.95
16.56	1906.56	16.56	422.892	16.56	951.737	16.56	1032.61
16.57	1894.66	16.57	487.079	16.57	27.3403	16.57	1317.12
16.58	486.348	16.58	292.81	16.58	918.701	16.58	44.7115
16.59	1145.02	16.59	931.522	16.59	999.55	16.59	2235.63
16.6	2047.1	16.6	1381.22	16.6	524.817	16.6	2758
16.61	2691.55	16.61	1095.03	16.61	1252.97	16.61	2443.1
16.62	-70.6864	16.62	1420.68	16.62	348.463	16.62	2108.55
16.63	1301.1	16.63	323.068	16.63	702.545	16.63	1585.68
16.64	642.64	16.64	-262.979	16.64	162.761	16.64	1589.98
16.65	1053.42	16.65	-247.769	16.65	464.996	16.65	1185.24
16.66	1958.22	16.66	614.886	16.66	1398.18	16.66	1431.97
16.67	1108.72	16.67	892.159	16.67	1013.44	16.67	1537.42
16.68	1759.66	16.68	687.753	16.68	616.315	16.68	1396.17
16.69	1265.54	16.69	1203.26	16.69	16.2077	16.69	1425.67
16.7	1139.16	16.7	233.173	16.7	516.263	16.7	536.17
16.71	1062.37	16.71	292.233	16.71	1264.75	16.71	174.717
16.72	434.941	16.72	327.964	16.72	1234.55	16.72	1850.72
16.73	811.029	16.73	-246.396	16.73	767.366	16.73	2405.26
16.74	768.404	16.74	259.92	16.74	1424.97	16.74	1331.57
16.75	2566.24	16.75	671.39	16.75	1440.82	16.75	2860.92
16.76	1455.18	16.76	945.245	16.76	801.876	16.76	1305.99
16.77	1172.04	16.77	1252.73	16.77	1531.41	16.77	1128.77
16.78	358.745	16.78	1142.79	16.78	1620.59	16.78	2721.8
16.79	380.235	16.79	-967.872	16.79	823.124	16.79	1523.24
16.8	1417.39	16.8	120.026	16.8	1319.87	16.8	2369
16.81	522.825	16.81	111.737	16.81	1249.52	16.81	2656.07
16.82	524.608	16.82	-777.269	16.82	1618.8	16.82	1923.32
16.83	1130.06	16.83	388.791	16.83	1443.35	16.83	1848.83
16.84	1114.85	16.84	190.856	16.84	856.694	16.84	620.877
16.85	2468.26	16.85	404.272	16.85	378.89	16.85	-263.187
16.86	2081.23	16.86	906.832	16.86	1747.54	16.86	1671.67
16.87	458.834	16.87	313.119	16.87	927.543	16.87	1512.25
16.88	1411.7	16.88	889.208	16.88	373.881	16.88	1195.17
16.89	1755.07	16.89	345.827	16.89	888.367	16.89	1451.45
16.9	988.829	16.9	1121.27	16.9	786.881	16.9	2793.2
16.91	1690.27	16.91	-283.75	16.91	157.325	16.91	1639.92
16.92	1081.44	16.92	1089.7	16.92	496.021	16.92	1467.66
16.93	639.396	16.93	366.999	16.93	1238.36	16.93	1804.29
16.94	2430.44	16.94	80.6426	16.94	1130.73	16.94	3590.65
16.95	2636.29	16.95	528.079	16.95	842.502	16.95	2070.67
16.96	1195.79	16.96	908.946	16.96	913.709	16.96	1552.47
16.97	324.936	16.97	1967.6	16.97	664.463	16.97	1371.48
16.98	1345.47	16.98	563.985	16.98	1394.82	16.98	2326.06
16.99	349.07	16.99	94.2047	16.99	1368.53	16.99	2950.39
17	1641.78	17	327.901	17	1243.39	17	1676.69
17.01	716.469	17.01	953.876	17.01	246.176	17.01	1065.43
17.02	2103.9	17.02	582.894	17.02	-225.694	17.02	1118.81
17.03	1025.64	17.03	1335.92	17.03	1516.85	17.03	1870.5
17.04	994.218	17.04	543.19	17.04	1119.91	17.04	1214.78
17.05	1088.16	17.05	649.956	17.05	1416.98	17.05	2088.45
17.06	1583.73	17.06	1119.76	17.06	700.914	17.06	1958.4
17.07	1612.86	17.07	398.66	17.07	-197.116	17.07	1502.74
17.08	2796.76	17.08	85.9137	17.08	1280.2	17.08	1343.54
17.09	2513.37	17.09	281.788	17.09	-219.559	17.09	2461.29
17.1	677.218	17.1	-2.63806	17.1	696.227	17.1	1782.33
17.11	1027.75	17.11	1007.81	17.11	-310.635	17.11	995.172
17.12	107.12	17.12	1538.21	17.12	1161.49	17.12	2552.44
17.13	1230.68	17.13	-30.3255	17.13	1158.49	17.13	1905.69
17.14	1464.19	17.14	150.61	17.14	490.452	17.14	1435.06
17.15	1316.67	17.15	138.642	17.15	356.45	17.15	2822.98
17.16	522.95	17.16	872.472	17.16	260.816	17.16	1902.41
17.17	481.858	17.17	-58.4839	17.17	640.033	17.17	1163.24
17.18	1311.69	17.18	166.016	17.18	649.923	17.18	2723.64
17.19	1168.38	17.19	1683.96	17.19	749.026	17.19	2894.17
17.2	1354.05	17.2	409.932	17.2	-642.371	17.2	2881.83
17.21	1181.35	17.21	984.712	17.21	1164.49	17.21	2394.98
17.22	1047.53	17.22	964.085	17.22	929.684	17.22	3512.79
17.23	1618.9	17.23	1356.52	17.23	398.229	17.23	3011
17.24	372.295	17.24	-164.502	17.24	1045.57	17.24	2914
17.25	1221.57	17.25	772.732	17.25	90.0618	17.25	840.628
17.26	775.459	17.26	154.885	17.26	788.185	17.26	2199.23
17.27	1191.57	17.27	396.215	17.27	349.516	17.27	1379.54
17.28	-253.187	17.28	805.084	17.28	984.252	17.28	2825.75
17.29	1034.78	17.29	1760.08	17.29	361.083	17.29	2195.19
17.3	653.824	17.3	860.259	17.3	264.311	17.3	1827.89
17.31	1844.13	17.31	1221.09	17.31	1157.86	17.31	2866.67
17.32	1226.67	17.32	-339.494	17.32	715.712	17.32	1681.69
17.33	1144.88	17.33	-175.319	17.33	497.186	17.33	1458.58
17.34	359.114	17.34	256.876	17.34	1825.04	17.34	1230.21
17.35	1000.25	17.35	-472.627	17.35	-314.451	17.35	1427.58
17.36	1360.55	17.36	347.905	17.36	649.061	17.36	2201.68
17.37	1640.56	17.37	791.617	17.37	724.206	17.37	1793.92
17.38	2742.6	17.38	1873.71	17.38	883.363	17.38	1539.69
17.39	1182.91	17.39	887.177	17.39	677.293	17.39	2221.03
17.4	1081.14	17.4	2076.19	17.4	1161.24	17.4	1722.48
17.41	1089.76	17.41	-114.025	17.41	424.591	17.41	2661.67
17.42	512.156	17.42	-390.804	17.42	1536.49	17.42	2964.78
17.43	1993.28	17.43	890.854	17.43	1142.56	17.43	1319.23
17.44	1389.68	17.44	1575.92	17.44	1905.52	17.44	1734.65
17.45	1217.22	17.45	444.383	17.45	733.988	17.45	2458.62
17.46	1784.04	17.46	755.182	17.46	447.898	17.46	2466.79
17.47	2257.48	17.47	981.342	17.47	390.985	17.47	2499.42
17.48	1741.73	17.48	53.2379	17.48	332.536	17.48	3363.94
17.49	239.195	17.49	287.286	17.49	721.966	17.49	1366.4
17.5	510.065	17.5	-920.135	17.5	640.578	17.5	633.04
17.51	1103.6	17.51	354.369	17.51	203.643	17.51	2173.06
17.52	1277.87	17.52	1213.19	17.52	1132.59	17.52	2722.17
17.53	198.241	17.53	453.681	17.53	-266.166	17.53	984.131
17.54	-209.58	17.54	560.884	17.54	561.286	17.54	1562.64
17.55	1538.89	17.55	1101.81	17.55	734.744	17.55	2672.7
17.56	772.819	17.56	1561.63	17.56	900.607	17.56	2075.14
17.57	512.084	17.57	1389.46	17.57	1858.1	17.57	2150.93
17.58	2510.59	17.58	-337.382	17.58	938.085	17.58	2450.47
17.59	1655.76	17.59	202.632	17.59	672.729	17.59	2404.04
17.6	1987.84	17.6	583.62	17.6	1140.89	17.6	1815.23
17.61	1480.98	17.61	1147.9	17.61	720.025	17.61	3167.37
17.62	1298.13	17.62	164.538	17.62	-382.26	17.62	2680.09
17.63	1891.26	17.63	211.971	17.63	1594.7	17.63	-436.494
17.64	427.681	17.64	217.301	17.64	559.12	17.64	3362.93
17.65	1279.78	17.65	535.177	17.65	1038.93	17.65	1115.42
17.66	1896.1	17.66	933.495	17.66	1439.16	17.66	1264.2
17.67	1335.5	17.67	1492.43	17.67	329.422	17.67	1491.03
17.68	2053.96	17.68	-31.8956	17.68	1047.81	17.68	264.672
17.69	1900.99	17.69	1411.99	17.69	1117.09	17.69	1837.32
17.7	1212.59	17.7	-415.558	17.7	1310.2	17.7	1190.97
17.71	1088.29	17.71	-45.7747	17.71	1402.84	17.71	1626.55
17.72	612.394	17.72	-450.21	17.72	1733.91	17.72	2712.84
17.73	1067.7	17.73	1080.99	17.73	795.879	17.73	1751.54
17.74	1227.3	17.74	618.81	17.74	1544.93	17.74	1053.64
17.75	1991.98	17.75	1353.14	17.75	1974.25	17.75	-40.6938
17.76	1143.94	17.76	-551.702	17.76	216.024	17.76	1241.3
17.77	1294.85	17.77	-114.884	17.77	569.631	17.77	2757.24
17.78	1541.32	17.78	315.827	17.78	381.763	17.78	1119.54
17.79	1143.9	17.79	-341.528	17.79	1315.17	17.79	1791.35
17.8	1052.2	17.8	-437.093	17.8	870.766	17.8	1738.68
17.81	-9.06402	17.81	445.702	17.81	185.288	17.81	1266.24
17.82	1726.04	17.82	617.917	17.82	1114.08	17.82	1647.53
17.83	1819.1	17.83	1035.64	17.83	772.299	17.83	2153.42
17.84	2806.41	17.84	723.766	17.84	1080.38	17.84	2329.72
17.85	1547.85	17.85	-1652.18	17.85	716.857	17.85	1859.38
17.86	897.708	17.86	882.629	17.86	255.954	17.86	712.266
17.87	245.236	17.87	1130.71	17.87	1803.28	17.87	143.83
17.88	1502.31	17.88	-161.355	17.88	1455.11	17.88	2191.62
17.89	486.319	17.89	732.826	17.89	695.241	17.89	1104
17.9	1077.37	17.9	858.537	17.9	976.318	17.9	2212.74
17.91	-24.664	17.91	367.497	17.91	1509.26	17.91	1673.99
17.92	210.728	17.92	972.726	17.92	1601.67	17.92	1627.45
17.93	526.508	17.93	-204.056	17.93	2439.77	17.93	2182.57
17.94	824.969	17.94	841.407	17.94	468.368	17.94	1493.27
17.95	825.824	17.95	1671.21	17.95	227.753	17.95	832.779
17.96	1041.25	17.96	695.811	17.96	289.252	17.96	1034.87
17.97	1557.03	17.97	-333.37	17.97	575.804	17.97	2107.24
17.98	1690.68	17.98	278.763	17.98	729.268	17.98	1967.38
17.99	1687.14	17.99	146.815	17.99	1260.75	17.99	2162.26
18	1519.3	18	500.882	18	476.713	18	1988.6
18.01	1311.75	18.01	1076.23	18.01	1208.97	18.01	1750.55
18.02	1096.05	18.02	-170.283	18.02	755.799	18.02	1320.71
18.03	213.59	18.03	1005.12	18.03	1435.03	18.03	1188.22
18.04	2088.85	18.04	1010	18.04	692.502	18.04	1587.22
18.05	1863.99	18.05	2481.84	18.05	1420.57	18.05	812.131
18.06	2034.69	18.06	-161.814	18.06	766.842	18.06	3291.06
18.07	642.86	18.07	694.079	18.07	1491.74	18.07	1503.06
18.08	125.844	18.08	803.501	18.08	1477.47	18.08	1030.66
18.09	1183.29	18.09	820.306	18.09	115.434	18.09	219.48
18.1	1749.31	18.1	1450.94	18.1	590.724	18.1	1354.21
18.11	526.18	18.11	473.753	18.11	1322.09	18.11	1596.74
18.12	1540.46	18.12	626.723	18.12	497.972	18.12	2022.53
18.13	9.0167	18.13	949.655	18.13	1068.22	18.13	1779.88
18.14	363.908	18.14	257.045	18.14	907.475	18.14	2382.32
18.15	879.767	18.15	769.352	18.15	168.41	18.15	4125.43
18.16	2391.21	18.16	978.985	18.16	780.207	18.16	1972.79
18.17	1028.47	18.17	984.739	18.17	1105.98	18.17	1973.33
18.18	818.966	18.18	775.342	18.18	933.028	18.18	2835.47
18.19	-69.4075	18.19	-609.389	18.19	845.172	18.19	2416.97
18.2	1218.5	18.2	889.759	18.2	1783.33	18.2	1331.64
18.21	1701.49	18.21	81.7106	18.21	1107.85	18.21	2758.4
18.22	1382.78	18.22	-33.9813	18.22	1144.8	18.22	1706.82
18.23	1255.55	18.23	1101.08	18.23	523.839	18.23	3018.52
18.24	-232.541	18.24	1083.26	18.24	725.754	18.24	870.766
18.25	1177.16	18.25	154.92	18.25	611.851	18.25	1622.65
18.26	1903.03	18.26	1107.37	18.26	656.034	18.26	2152.68
18.27	409.699	18.27	370.092	18.27	1253.92	18.27	1995.77
18.28	1719.44	18.28	-90.0695	18.28	972.398	18.28	1346.17
18.29	1711.95	18.29	696.778	18.29	754.167	18.29	2503.58
18.3	985.555	18.3	-494.777	18.3	1217.79	18.3	339.247
18.31	329.658	18.31	571.633	18.31	1201.23	18.31	2277.87
18.32	764.439	18.32	384.496	18.32	1429.17	18.32	2517.77
18.33	1314.81	18.33	-481.657	18.33	420.79	18.33	2323.43
18.34	1534.93	18.34	577.095	18.34	260.829	18.34	1586.35
18.35	1508.05	18.35	38.4025	18.35	721.757	18.35	2240.46
18.36	1670.59	18.36	374.052	18.36	439.181	18.36	1417.58
18.37	1494.71	18.37	488.433	18.37	1031.14	18.37	1223.35
18.38	892.945	18.38	215.827	18.38	979.726	18.38	2372.66
18.39	2035.77	18.39	545.667	18.39	510.19	18.39	2205.08
18.4	1348.63	18.4	-125.099	18.4	748.265	18.4	1228.32
18.41	904.456	18.41	1161.31	18.41	1336.64	18.41	2111.91
18.42	1020.43	18.42	626.39	18.42	1194.88	18.42	1635.42
18.43	1908.85	18.43	1779.67	18.43	715.844	18.43	323.6
18.44	2014.48	18.44	2147.05	18.44	1611.78	18.44	2407.43
18.45	1723.06	18.45	1120.54	18.45	365.838	18.45	1881.57
18.46	1288.3	18.46	954.064	18.46	1124.8	18.46	1640.78
18.47	1451.82	18.47	110.391	18.47	-317.114	18.47	1728.88
18.48	1587.41	18.48	1243.32	18.48	963.797	18.48	2058.71
18.49	2006.86	18.49	1581.01	18.49	1370.04	18.49	1884.02
18.5	663.131	18.5	221.778	18.5	2076.76	18.5	944.878
18.51	1201.5	18.51	674.052	18.51	548.858	18.51	2702.02
18.52	553.324	18.52	1536.07	18.52	556.005	18.52	1790.46
18.53	443.343	18.53	185.316	18.53	837.357	18.53	1899.16
18.54	1620.84	18.54	1574.53	18.54	1735.62	18.54	1899.13
18.55	1174.52	18.55	563.468	18.55	1027.95	18.55	2021.41
18.56	2093.6	18.56	1121.55	18.56	1657.7	18.56	1501.01
18.57	753.977	18.57	1096.53	18.57	596.92	18.57	563.755
18.58	1481.98	18.58	1484.44	18.58	916.774	18.58	1478.88
18.59	1913.84	18.59	344.388	18.59	71.3237	18.59	1634.08
18.6	955.953	18.6	1076.3	18.6	1268.66	18.6	2242.23
18.61	726.485	18.61	1037.92	18.61	787.094	18.61	1548.88
18.62	1400.99	18.62	1410.43	18.62	2049.54	18.62	2062.29
18.63	35.9136	18.63	1372.14	18.63	1209.89	18.63	500.972
18.64	-360.823	18.64	1145.33	18.64	922.924	18.64	1017.61
18.65	1855.08	18.65	1834.47	18.65	1493	18.65	2217.43
18.66	834.895	18.66	501.07	18.66	1616.29	18.66	1554.64
18.67	1504.37	18.67	1924.93	18.67	770.985	18.67	3205.36
18.68	950.755	18.68	2067.02	18.68	2214.41	18.68	2350.37
18.69	981.151	18.69	429.27	18.69	1096.52	18.69	2034.37
18.7	2411.02	18.7	887.091	18.7	2115.36	18.7	2287.5
18.71	1220.66	18.71	730.019	18.71	1556.68	18.71	1013.72
18.72	1639.29	18.72	56.4505	18.72	117.01	18.72	393.749
18.73	1594.28	18.73	606.169	18.73	1944.61	18.73	2032.82
18.74	931.787	18.74	1617.79	18.74	1483.3	18.74	2417.91
18.75	1822.67	18.75	2062.31	18.75	1458.03	18.75	2711.47
18.76	2484.78	18.76	1016.59	18.76	892.56	18.76	2212.59
18.77	1699.66	18.77	1017.44	18.77	1692.15	18.77	1954.61
18.78	1762.04	18.78	1771.43	18.78	2254.26	18.78	2918.56
18.79	2664.82	18.79	2560.48	18.79	1779.39	18.79	1339.02
18.8	2549.54	18.8	1989.68	18.8	1756.15	18.8	3158.69
18.81	2094.69	18.81	1096.91	18.81	1862.03	18.81	3645.88
18.82	2301.26	18.82	232.553	18.82	1543.66	18.82	2151.59
18.83	2217.85	18.83	1586.15	18.83	1444.68	18.83	3507.35
18.84	2120.25	18.84	467.065	18.84	1564.26	18.84	2799.23
18.85	2140.17	18.85	1889.79	18.85	1942.07	18.85	2485.65
18.86	1841.72	18.86	1930.56	18.86	2642.24	18.86	3193.41
18.87	2415.71	18.87	2664.58	18.87	2915.87	18.87	2876.93
18.88	2004.26	18.88	1679.44	18.88	3315.23	18.88	4777.79
18.89	2743.48	18.89	2911.59	18.89	4169.52	18.89	4785.34
18.9	2367.31	18.9	3899.07	18.9	4284.6	18.9	4878.8
18.91	2153.8	18.91	3608.98	18.91	4053.62	18.91	4978.33
18.92	1474.7	18.92	2899.98	18.92	4509.83	18.92	4417.28
18.93	3093.2	18.93	3539.7	18.93	5039.62	18.93	5904.91
18.94	2891.17	18.94	1963.39	18.94	4306.53	18.94	7825.01
18.95	4042.45	18.95	4410.89	18.95	4795.21	18.95	8105.26
18.96	3206.35	18.96	4713.22	18.96	5002.81	18.96	9340.38
18.97	3222.35	18.97	4478.71	18.97	4707.82	18.97	9365.5
18.98	4260.78	18.98	4702.6	18.98	5475.59	18.98	9859.35
18.99	4336.38	18.99	6476.7	18.99	4607.66	18.99	11146
19	3517.51	19	5914.99	19	5171.26	19	12860.4
19.01	3815.83	19.01	6505.64	19.01	4350.27	19.01	12249.5
19.02	3487.86	19.02	6880.88	19.02	4024.7	19.02	11949.5
19.03	4214.74	19.03	7740.26	19.03	2825.48	19.03	9126.37
19.04	3999.4	19.04	6591.23	19.04	3334.69	19.04	10574.3
19.05	6230.48	19.05	7798.01	19.05	2858.94	19.05	8938.45
19.06	5181.06	19.06	7213.84	19.06	3734.14	19.06	7126.92
19.07	5863.49	19.07	6292.38	19.07	2592.72	19.07	6591.79
19.08	3941.89	19.08	4532.86	19.08	2617.73	19.08	4878
19.09	4699.06	19.09	5742	19.09	2489.77	19.09	5392.84
19.1	4461.79	19.1	5165.03	19.1	2204.89	19.1	4206.02
19.11	3743.33	19.11	3920.57	19.11	2937	19.11	4358.21
19.12	5660.28	19.12	3874.75	19.12	1755.3	19.12	3904.42
19.13	5139.56	19.13	4878.37	19.13	2531.11	19.13	2853.42
19.14	3792.83	19.14	3792.61	19.14	955.41	19.14	3318.03
19.15	4691.58	19.15	4073.61	19.15	1676.93	19.15	1540.79
19.16	3290.64	19.16	4299.17	19.16	1411.61	19.16	2499.11
19.17	3577.52	19.17	2409.5	19.17	1768.72	19.17	3229.22
19.18	3353.65	19.18	2304.14	19.18	1409.46	19.18	2046.81
19.19	2747.32	19.19	2814.35	19.19	1641.58	19.19	2689.06
19.2	2600.98	19.2	2232.24	19.2	686.239	19.2	1484.41
19.21	3550.22	19.21	2484.68	19.21	1620.8	19.21	2455.22
19.22	2865.37	19.22	1272.67	19.22	1479.13	19.22	3317.22
19.23	2133.69	19.23	2275.96	19.23	1417.57	19.23	2047.74
19.24	2337.51	19.24	2378.56	19.24	2310.96	19.24	2485.89
19.25	1825.93	19.25	2522.31	19.25	1563.24	19.25	1610.7
19.26	1804.91	19.26	1467.17	19.26	1363.85	19.26	1053.08
19.27	968.67	19.27	2544.22	19.27	1794.74	19.27	1345.9
19.28	2739.36	19.28	1378.7	19.28	746.543	19.28	2486.65
19.29	2227.46	19.29	2054.02	19.29	1474.24	19.29	1441.08
19.3	3715.45	19.3	2597.4	19.3	1875.31	19.3	2079.49
19.31	2254.43	19.31	810.562	19.31	1527.85	19.31	1497.08
19.32	2095.7	19.32	725.14	19.32	2515.27	19.32	1145.03
19.33	1933.02	19.33	646.532	19.33	2059.29	19.33	3350.25
19.34	880.873	19.34	1560.66	19.34	1260.12	19.34	2778.7
19.35	2067.67	19.35	1307.72	19.35	1173.69	19.35	3222.12
19.36	2380.96	19.36	-38.3274	19.36	2157.91	19.36	2513.78
19.37	2592.15	19.37	1192.97	19.37	1437.15	19.37	1611.17
19.38	687.746	19.38	674.517	19.38	1858.34	19.38	2437.52
19.39	1791.04	19.39	2802.52	19.39	1016.83	19.39	1292.11
19.4	1833.35	19.4	1121.69	19.4	1493.94	19.4	1738.78
19.41	1821.14	19.41	635.146	19.41	2411.98	19.41	2905.14
19.42	1327	19.42	70.4311	19.42	1455.99	19.42	2281.8
19.43	1561.77	19.43	665.563	19.43	-143.362	19.43	2538.32
19.44	981.572	19.44	1760.53	19.44	1226.41	19.44	2968.08
19.45	162.08	19.45	1226.37	19.45	2040.55	19.45	1946.05
19.46	550.642	19.46	2156.59	19.46	1363.33	19.46	1035.52
19.47	-360.26	19.47	2374.45	19.47	686.807	19.47	1393.86
19.48	1799.63	19.48	1335.28	19.48	2107.24	19.48	1711.67
19.49	985.128	19.49	250.909	19.49	1788.16	19.49	1166.27
19.5	1380.86	19.5	1852.44	19.5	1923.77	19.5	2263.69
19.51	2081.66	19.51	1635.09	19.51	1309.68	19.51	2144.48
19.52	302.649	19.52	2565.39	19.52	832.315	19.52	1737.97
19.53	1555.79	19.53	1800.92	19.53	1710.82	19.53	2950.62
19.54	1252.81	19.54	943.459	19.54	645.895	19.54	2515.85
19.55	-78.6786	19.55	694.115	19.55	1684.12	19.55	1768.26
19.56	1145.13	19.56	1490.42	19.56	1199.33	19.56	1340.39
19.57	744.375	19.57	2296.89	19.57	1603.48	19.57	943.491
19.58	875.609	19.58	1764.27	19.58	878.416	19.58	1717
19.59	97.4326	19.59	1703.37	19.59	1899.46	19.59	1810.43
19.6	2144.18	19.6	1674.46	19.6	2232.49	19.6	2313.02
19.61	1221.98	19.61	1847.45	19.61	2021.96	19.61	1780.09
19.62	1872.5	19.62	621.979	19.62	847.952	19.62	648.781
19.63	1076.48	19.63	1034.22	19.63	1681.77	19.63	1694.14
19.64	915.165	19.64	1308.34	19.64	1629.69	19.64	1561.7
19.65	1700.14	19.65	603.022	19.65	1848.25	19.65	1885.8
19.66	-77.9593	19.66	317.206	19.66	2003.45	19.66	625.398
19.67	1201.18	19.67	1541.86	19.67	452.953	19.67	713.042
19.68	785.563	19.68	1899.48	19.68	1703.43	19.68	689.503
19.69	910.938	19.69	1988.01	19.69	1913.28	19.69	1011.39
19.7	1271.54	19.7	1778.96	19.7	1598.62	19.7	1835.18
19.71	817.384	19.71	2009.24	19.71	2392.68	19.71	1125.31
19.72	-516.717	19.72	1991.34	19.72	2016.13	19.72	3556.4
19.73	814.956	19.73	2641.4	19.73	612.209	19.73	1635.15
19.74	1094.13	19.74	2091.05	19.74	2098.87	19.74	1467.79
19.75	993.71	19.75	2091.32	19.75	1803.51	19.75	834.122
19.76	-23.0509	19.76	1944.44	19.76	1218.1	19.76	3228.38
19.77	1755.99	19.77	1302.96	19.77	411.142	19.77	1865.31
19.78	1731.75	19.78	2304.62	19.78	1736.56	19.78	1540.58
19.79	977.36	19.79	1474.1	19.79	1323.94	19.79	2313.35
19.8	820.915	19.8	2065.45	19.8	1784.83	19.8	1908.15
19.81	1108.51	19.81	3107.41	19.81	2041.02	19.81	818.738
19.82	851.931	19.82	1125.76	19.82	1053.07	19.82	419.295
19.83	1001.47	19.83	994.58	19.83	3095.74	19.83	1022.5
19.84	398.029	19.84	758.172	19.84	1174.12	19.84	1130.56
19.85	1560.1	19.85	206.429	19.85	1248.52	19.85	2234.24
19.86	1510.09	19.86	1489.43	19.86	1506.76	19.86	2265.06
19.87	1507.7	19.87	1598.55	19.87	1686.51	19.87	1628.05
19.88	691.392	19.88	1128.65	19.88	507.1	19.88	1421.71
19.89	1223.36	19.89	974.885	19.89	1647.53	19.89	1427.76
19.9	856.517	19.9	536.703	19.9	2246.17	19.9	334.864
19.91	834.799	19.91	3021.56	19.91	1600.37	19.91	891.678
19.92	-106.144	19.92	-566.117	19.92	1458.16	19.92	1583.74
19.93	671.48	19.93	2110.72	19.93	2817.55	19.93	3231.76
19.94	1858.47	19.94	2280.73	19.94	1856.01	19.94	1842.3
19.95	1321.09	19.95	775.844	19.95	2203.95	19.95	806.378
19.96	713.397	19.96	2106.16	19.96	1146.96	19.96	772.999
19.97	1957.43	19.97	948.949	19.97	738.759	19.97	1925.17
19.98	2144.48	19.98	1131.21	19.98	1417.53	19.98	2041.57
19.99	1429.63	19.99	1915.71	19.99	2108.28	19.99	2257.11
20	2359.28	20	2749.37	20	1705.82	20	1396.95
20.01	1434.62	20.01	2787.62	20.01	865.322	20.01	1556.1
20.02	693.362	20.02	3138.52	20.02	921.392	20.02	3005.93
20.03	2254.35	20.03	1403.24	20.03	2112.92	20.03	1881.69
20.04	2330.29	20.04	1694.64	20.04	1031.26	20.04	1978.9
20.05	2467.44	20.05	1664.13	20.05	1262.57	20.05	3273.97
20.06	1580.01	20.06	1442.2	20.06	1847.5	20.06	1067.49
20.07	388.988	20.07	1125.05	20.07	771.449	20.07	2920.65
20.08	1405.11	20.08	2087.65	20.08	2524.77	20.08	2847.82
20.09	2299.69	20.09	1014.19	20.09	231.638	20.09	1094.22
20.1	602.649	20.1	1647.67	20.1	317.694	20.1	1374.87
20.11	2149.82	20.11	2493.22	20.11	1152.24	20.11	1225.07
20.12	1006.72	20.12	2225.6	20.12	1680.67	20.12	791.323
20.13	850.91	20.13	1010.31	20.13	2265.78	20.13	2386.13
20.14	683.368	20.14	1415.71	20.14	2172.08	20.14	1488.04
20.15	1679.92	20.15	1990.12	20.15	2152.34	20.15	2197.72
20.16	1842.7	20.16	1261.18	20.16	825.601	20.16	2865.05
20.17	1093.63	20.17	2311.31	20.17	1629.76	20.17	1808.39
20.18	965.399	20.18	1811.94	20.18	2014	20.18	1865.6
20.19	512.656	20.19	1529.81	20.19	1429.68	20.19	2737.5
20.2	418.317	20.2	-137.07	20.2	1958	20.2	1522.14
20.21	1882.6	20.21	1632	20.21	1761.72	20.21	1378.19
[truncated: 6,279 more rows]

[truncated: 33 more sheets: FIGURE 3(d), FIGURE 3(e), FIGURE 6, FIGURE 7(a), FIGURE 7(b), FIGURE 7(c), FIGURE 7(d), FIGURE 7(e), FIGURE S1(a), FIGURE S1(b), FIGURE S1(c), Figure S2, Figure S3 and Table S1 L-350, Figure S3 and Table S1 L-400, Figure S3 and Table S1 L-450, Figure S3 and Table S1 L-500, Figure S3 and Table S1 RD3-350, Figure S3 and Table S1 RD3-400, Figure S3 and Table S1 RD3-450, Figure S3 and Table S1 RD3-500 …]
